# Supplementary material for: Analysis of MAPK and MAPKK gene families in wheat and related Triticeae species
Source: PubMed Central journal article supplement (PMC5838963; doi:10.1186/s12864-018-4545-9), 2018-03-05
Supplement: 12864_2018_4545_MOESM3_ESM.pdf [file 12864_2018_4545_MOESM3_ESM.pdf]

**Additional File 3. Triticeae MPK and MKK accessions and nomenclature.** Six tables are presented below one for each species: *Triticeae aestivum* (pages 2-5), *Hordeum vulgare* (pages 6-7), *Secale cereale* (page 8), *xTritosecale* (page 9), *Aegilops tauschii* (page 10), *Triticum urartum* (page 11). Nucleotide accessions were collected from various databases as indicated in the footnote for each table. Translated sequences from nucleotides marked in bold were used for phylogenetic analysis (Figs 1, 2 and 3, and Additional File 11).

## References

1. Takezawa D. Elicitor- and A23187-induced expression of WCK-1, a gene encoding mitogen-activated protein kinase in wheat. *Plant Mol Biol.* 1999;40:921-33.
2. Lian W-w, Tang Y-m, Gao S-q, Zhang Z, Zhao X, Zhao C-p. Phylogenetic analysis and expression patterns of the MAPK gene family in wheat (*Triticum aestivum* L.). *J Integr Agric.* 2012;11:1227-35.
3. Rudd JJ, Keon J, Hammond-Kosack KE. The wheat mitogen-activated protein kinases TaMPK3 and TaMPK6 are differentially regulated at multiple levels during compatible disease interactions with *Mycosphaerella graminicola*. *Plant Physiol.* 2008;147:802-15.
4. Cevher-Keskin B, Yıldızhan Y, Kulen O, Onarıcı S. Quantitative expression analysis of TaMPK4 and TaTIP1 genes in drought tolerant and non-tolerant wheat (*Triticum aestivum* L.) cultivars. *Plant Omics Journal.* 2015;8:270-7.
5. Zhan H, Yue H, Zhao X, Wang M, Song W, Nie X. Genome-Wide Identification and Analysis of MAPK and MAPKK Gene Families in Bread Wheat (*Triticum aestivum* L.). *Genes.* 2017;8:284.
6. Wen Y, Li X, Guo C, Ma C, Duan W, Lu W, Xiao K. Characterization and expression analysis of mitogen-activated protein kinase cascade genes in wheat subjected to phosphorus and nitrogen deprivation, high salinity, and drought. *J Plant Biochem Biotechnol.* 2015;24:184-96.
7. Yao S, Wang Y, Yang T, Kou F, Lu W, Xiao K. Expression pattern and function of wheat mitogen-activated protein kinase (MPK) cascade genes under micronutrient-deprived conditions. *Acta Physiol Plant.* 2016;39:40.
8. Yao S-f, Wang Y-x, Yang T-r, Hao L, Lu W-j, Xiao K. Expression and functional analyses of the mitogen-activated protein kinase (MPK) cascade genes in response to phytohormones in wheat (*Triticum aestivum* L.). *J Integr Agric.* 2017;16:27-35.
9. Gao Y, Liu X, Stebbing J-A, He D, Laroche A, Gaudet D, Xing T. *TaFLRS*, a novel mitogen-activated protein kinase in wheat defence responses. *Eur J Plant Pathol.* 2011;131:643-51.
10. Alsaïari S. Functional analysis of FLRS and FLR in wheat during drought stress. *M.Sc. Thesis.* Ottawa, Canada: Carleton University; 2012.
11. Liu, X., Lin, Y., Liu, D., Wang, C., Zhao, Z., Cui, X., Liu, Y., and Yang, Y. (2017). MAPK-mediated auxin signal transduction pathways regulate the malic acid secretion under aluminum stress in wheat (*Triticum aestivum* L.). *Scientific Reports* 7:1620.
12. Hao L, Wen Y, Zhao Y, Lu W, Xiao K. Wheat mitogen-activated protein kinase gene TaMPK4 improves plant tolerance to multiple stresses through modifying root growth, ROS metabolism, and nutrient acquisitions. *Plant Cell Rep.* 2015;34:2081-97.
13. Singh D, Bhaganagare G, Bandopadhyay R, Prabhu K, Gupta P, Mukhopadhyay K. Targeted spatio-temporal expression based characterization of state of infection and time-point of maximum defense in wheat NILs during leaf rust infection. *Molecular Biology Reports.* 2012;39:9373-82.
14. Křenek P, Niks RE, Vels A, Vypelková P, Šamaj J. Genome-wide analysis of the barley MAPK gene family and its expression patterns in relation to *Puccinia hordei* infection. *Acta Physiol Plant.* 2015;37:1-16.
15. Abass M, Morris PC. The *Hordeum vulgare* signalling protein MAP kinase 4 is a regulator of biotic and abiotic stress responses. *J Plant Physiol.* 2013;170:1353-9.
16. Nakamura S, Pourkheirandish M, Morishige H, Kubo Y, Nakamura M, Ichimura K, Seo S, Kanamori H, Wu J, Ando T, et al. Mitogen-activated protein kinase kinase 3 regulates seed dormancy in barley. *Curr Biol.* 2016;26:775-81.
17. Khalil HB, Ehdaievand M-R, Xu Y, Laroche A, Gulick PJ. Identification and characterization of rye genes not expressed in allohexaploid triticales. *BMC Genomics.* 2015;16:281.

## Wheat (*Triticum aestivum*)

| Gene Name         | Nucleotide                         | Loc | Protein    | Reported Names                                                                              | Comments                                                                                                                                         |
|-------------------|------------------------------------|-----|------------|---------------------------------------------------------------------------------------------|--------------------------------------------------------------------------------------------------------------------------------------------------|
| <b>Wheat MPKs</b> |                                    |     |            |                                                                                             |                                                                                                                                                  |
| <b>TaMPK3</b>     | AF079318 <sup>GB</sup>             | -   | AAC28850   | <i>WCK-1</i> <sup>GB,1</sup><br><i>TaMAPK1</i> <sup>2</sup><br><i>TaMPK3</i> <sup>3</sup>   | Genbank Gene ID 542829                                                                                                                           |
|                   | TA63689_4565 <sup>GB</sup>         | -   | -          | <i>TaMPK4</i> <sup>4</sup>                                                                  | Genbank accession provided by [4] could not be retrieved from the database; however, primer sequences show homology to TaMPK3 and its 3'-UTR     |
|                   | 306486_AA1008960.2 <sup>EP</sup>   | 4AS | A7L5U5     | <i>MPK3</i> <sup>EP</sup><br><i>TaMAPK30</i> <sup>5</sup>                                   |                                                                                                                                                  |
|                   | 320270_AA1033300.1 <sup>EP</sup>   | 4BL | A7L5U5     | <i>MPK3</i> <sup>EP</sup><br><i>TaMAPK9</i> <sup>5</sup><br><i>TaMAPK15</i> <sup>5</sup>    |                                                                                                                                                  |
|                   | 344691_AA1148960.1 <sup>EP</sup>   | 4DL | W5EFF0     | <i>MPK3</i> <sup>EP</sup><br><i>TaMAPK25</i> <sup>5</sup>                                   |                                                                                                                                                  |
| <b>TaMPK4</b>     | AK330924 <sup>GB</sup>             | -   | -          | <i>TaMPK6</i> <sup>6-8</sup><br><i>TaMAPK4</i> <sup>2</sup>                                 |                                                                                                                                                  |
|                   | 000118_AA0003960.1 <sup>EP</sup>   | 1AL | W4ZQS8     | <i>TaMAPK14</i> <sup>5</sup>                                                                |                                                                                                                                                  |
|                   | 030274_AA0084790.2 <sup>EP</sup>   | 1BL | W5A5U1     | <i>TaMAPK28</i> <sup>5</sup>                                                                |                                                                                                                                                  |
|                   | 061983_AA0206840.1 <sup>EP</sup>   | 1DL | -          | <i>TaMAPK32</i> <sup>5</sup>                                                                |                                                                                                                                                  |
| <b>TaMPK6</b>     | AY173962 <sup>GB</sup>             | -   | AAO16560   | <i>FLRS</i> <sup>GB,9,10</sup><br><i>TaMAPK2</i> <sup>3</sup><br><i>TaMPK6</i> <sup>2</sup> | Genbank Gene ID 543088; insertion encoding a ten residue stretch (277-VFPCGISSLQ-287) within the PK domain of AA061959.1 (see Additional File 6) |
|                   | JX646783                           | -   | AG061959   | <i>MAPKflrs</i> <sup>GB,11</sup>                                                            | Partial sequence; 100% sequence ID with AAO16560                                                                                                 |
|                   | AK333212 <sup>GB</sup>             | -   | -          | <i>TaMPK1</i> <sup>6-8</sup>                                                                | Single nucleotide and amino acid difference between RFL_contig3769 and AK333212                                                                  |
|                   | RFL_contig3769 <sup>TRI</sup>      | -   | -          | -                                                                                           |                                                                                                                                                  |
|                   | 570369_AA1834630.1 <sup>EP</sup>   | 7AS | -          | <i>TaMAPK48</i> <sup>5</sup>                                                                |                                                                                                                                                  |
|                   | 593766_AA1954300.1 <sup>EP</sup>   | 7BS | -          | <i>TaMAPK51</i> <sup>5</sup>                                                                |                                                                                                                                                  |
|                   | 622461_AA2040040.1 <sup>EP</sup>   | 7DS | -          | <i>TaMAPK19</i> <sup>5</sup>                                                                |                                                                                                                                                  |
| <b>TaMPK7</b>     | HQ650112 <sup>GB</sup>             | -   | AET10457   | <i>MAPK5</i> <sup>GB</sup>                                                                  |                                                                                                                                                  |
|                   | HQ650111 <sup>GB</sup>             | -   | AET10456   | <i>MAPK4/TaMPK4</i> <sup>GB,12</sup>                                                        |                                                                                                                                                  |
|                   | Ta.7205 <sup>GB</sup>              | -   | -          | <i>TaMAPK5</i> <sup>2</sup>                                                                 |                                                                                                                                                  |
|                   | tplb0018e09 <sup>TRI</sup>         | -   | -          | <i>TaMPK4</i> <sup>6-8</sup>                                                                |                                                                                                                                                  |
|                   | 558385_AA1792950.1.X <sup>EP</sup> | 7AL | -          | <i>TaMAPK12</i> <sup>5</sup>                                                                |                                                                                                                                                  |
|                   | 576902_AA1859240.1 <sup>EP</sup>   | 7BL | A0A088AX68 | <i>TaMAPK54</i> <sup>5</sup>                                                                |                                                                                                                                                  |
|                   | 603254_AA1979200.2 <sup>EP</sup>   | 7DL | -          | <i>TaMAPK21</i> <sup>5</sup>                                                                |                                                                                                                                                  |
| <b>TaMPK11</b>    | 603035_AA1974260.1 <sup>EP</sup>   | 7DL | -          | -                                                                                           |                                                                                                                                                  |
|                   | HAAB01041577 <sup>GB</sup>         | -   | -          | -                                                                                           | Proteins share 100% sequence identity                                                                                                            |
|                   | 555982_AA1751700.1 <sup>EP</sup>   | 7AL | W5H9L7     | -                                                                                           |                                                                                                                                                  |
|                   | JV870088 <sup>GB</sup>             | -   | -          | <i>TaMAPK3</i> <sup>2</sup>                                                                 | Proteins share 100% sequence identity                                                                                                            |
| <b>TaMPK14</b>    | 580661_AA1914980.1 <sup>EP</sup>   | 7BL | -          | -                                                                                           |                                                                                                                                                  |
|                   | 603600_AA1986180.1 <sup>EP</sup>   | 7DL | -          | -                                                                                           |                                                                                                                                                  |
|                   | AK332648 <sup>GB</sup>             | -   | -          | <i>TaMPK3</i> <sup>6-8</sup><br><i>TaMAPK6</i> <sup>2</sup>                                 |                                                                                                                                                  |
| <b>TaMPK14</b>    | 487866_AA1573320.1.X <sup>EP</sup> | 6AS | -          | <i>TaMAPK36</i> <sup>5</sup>                                                                |                                                                                                                                                  |
|                   | 514340_AA1658600.1.X <sup>EP</sup> | 6BS | -          | -                                                                                           |                                                                                                                                                  |

| Gene Name                        | Nucleotide                         | Loc    | Protein               | Reported Names          | Comments                                                                                            |
|----------------------------------|------------------------------------|--------|-----------------------|-------------------------|-----------------------------------------------------------------------------------------------------|
| <b>TaMPK16</b>                   | 544171_AA1747030.1 <sup>EP</sup>   | 6DS    | -                     | TaMAPK45 <sup>5</sup>   |                                                                                                     |
|                                  | DQ322665 <sup>GB</sup>             | -      | ABC54584              | MAPK2A <sup>GB,11</sup> | Genbank Gene ID 100136975                                                                           |
|                                  | DQ322666 <sup>GB</sup>             | -      | ABC54585              | MAPK2B <sup>GB,11</sup> | Genbank Gene ID 100137006                                                                           |
|                                  | DQ322667 <sup>GB</sup>             | -      | ABC54586              | TaMAPK11 <sup>2</sup>   |                                                                                                     |
|                                  | 020601_AA0078640.1 <sup>EP</sup>   | 1AS    | W4ZYA7                | MAPK2C <sup>GB</sup>    |                                                                                                     |
|                                  |                                    |        |                       | TaMAPK11 <sup>5</sup>   |                                                                                                     |
|                                  |                                    |        |                       | MPK16 <sup>EP</sup>     |                                                                                                     |
| 049733_AA0160590.2 <sup>EP</sup> | 1BS                                | A9RAB0 | TaMAPK27 <sup>5</sup> |                         |                                                                                                     |
|                                  |                                    |        | MPK16 <sup>EP</sup>   |                         |                                                                                                     |
| 642759_AA2122920.1 <sup>EP</sup> | U                                  | A9RAB1 | TaMAPK4 <sup>5</sup>  |                         |                                                                                                     |
|                                  |                                    |        | MPK16 <sup>EP</sup>   |                         |                                                                                                     |
| <b>TaMPK17</b>                   | AK333198 <sup>GB</sup>             | -      | -                     | TaMPK12 <sup>6-8</sup>  | Stop codon in PK domain                                                                             |
|                                  | RFL_contig3756 <sup>GB</sup>       | -      | -                     |                         |                                                                                                     |
|                                  | AY881102 <sup>GB</sup>             | -      | AAX20165              | MAPK1a <sup>GB,11</sup> |                                                                                                     |
|                                  |                                    |        |                       | TaMAPK14 <sup>2</sup>   |                                                                                                     |
|                                  | AY881103 <sup>GB</sup>             | -      | AAX20166              | MAPK1b <sup>GB</sup>    |                                                                                                     |
|                                  | DQ322668 <sup>GB</sup>             | -      | ABC54587              | MAPK1C <sup>GB</sup>    |                                                                                                     |
|                                  | DQ334402 <sup>GB</sup>             | -      | ABC65848              | MAPK1d <sup>GB,13</sup> | Genbank Gene ID 100125895;<br>premature stop?                                                       |
|                                  | DQ444321 <sup>GB</sup>             | -      | ABD97883              | MAPK1f <sup>GB,11</sup> |                                                                                                     |
|                                  | 556562_AA1765430.2 <sup>EP</sup>   | 7AL    | A9RAB3                | TaMAPK49 <sup>5</sup>   |                                                                                                     |
|                                  | 641980_AA2108810.2 <sup>EP</sup>   | U      | -                     | TaMAPK53 <sup>5</sup>   |                                                                                                     |
| 604680_AA2000630.1 <sup>EP</sup> | 7DL                                | Q5BU11 | TaMAPK20 <sup>5</sup> |                         |                                                                                                     |
| <b>TaMPK20-1</b>                 | KT187392 <sup>GB</sup>             | -      | AKS50324              | -                       |                                                                                                     |
|                                  | Ta.13373 <sup>GB</sup>             | -      | -                     | TaMAPK10 <sup>2</sup>   |                                                                                                     |
|                                  | 194002_AA0624350.1 <sup>EP</sup>   | 3AL    | AOA0K0YGT2            | TaMAPK38 <sup>5</sup>   |                                                                                                     |
|                                  | 224428_AA0796670.1.X <sup>EP</sup> | 3B     | -                     | -                       | Unidentified nucleotides (presumably 27<br>residue stretch) in C-terminal extension                 |
|                                  | 253300_AA0894090.1 <sup>EP</sup>   | 3DL    | -                     | TaMAPK8 <sup>5</sup>    |                                                                                                     |
| <b>TaMPK20-2</b>                 | AK331818 <sup>GB</sup>             | -      | -                     | TaMAPK9 <sup>6-8</sup>  |                                                                                                     |
|                                  |                                    |        |                       | TaMAPK9 <sup>2</sup>    |                                                                                                     |
|                                  | tplb0059e09 <sup>TRI</sup>         | -      | -                     | -                       | Predicted protein in database is<br>translated in the wrong frame                                   |
|                                  | 002534_AA0042880.5.X <sup>EP</sup> | 1AL    | -                     | TaMAPK43 <sup>5</sup>   |                                                                                                     |
|                                  | 030959_AA0104540.1 <sup>EP</sup>   | 1BL    | -                     | TaMAPK6 <sup>5</sup>    |                                                                                                     |
| 063491_AA0227870.2 <sup>EP</sup> | 1DL                                | -      | TaMAPK34 <sup>5</sup> |                         |                                                                                                     |
| <b>TaMPK20-3</b>                 | KR422425 <sup>GB</sup>             | -      | AKL80627              | -                       |                                                                                                     |
|                                  | 557823_AA1786610.1 <sup>EP</sup>   | 7AL    | W5HC04                | TaMAPK3 <sup>5</sup>    |                                                                                                     |
|                                  | 577050_AA1864020.2 <sup>EP</sup>   | 7BL    | -                     | TaMAPK52 <sup>5</sup>   |                                                                                                     |
|                                  | 604962_AA2003380.1 <sup>EP</sup>   | 7DL    | -                     | TaMAPK7 <sup>5</sup>    |                                                                                                     |
| <b>TaMPK20-4</b>                 | AK333309 <sup>GB</sup>             | -      | see comment           | TaMAPK7 <sup>2</sup>    | NCBI Genomic Scaffold Match:<br>HG670306; RFL predicted protein is<br>translated in the wrong frame |
|                                  | RFL_contig3856 <sup>TRI</sup>      | -      |                       | TaMAPK8 <sup>2</sup>    |                                                                                                     |
|                                  | 195023_AA0643580.5 <sup>EP</sup>   | 3AL    | -                     | TaMAPK39 <sup>5</sup>   |                                                                                                     |
|                                  | 225288_AA0806810.1 <sup>EP</sup>   | 3B     | AOA077RTL3            | TaMAPK16 <sup>5</sup>   |                                                                                                     |
|                                  | 250331_AA0866300.5 <sup>EP</sup>   | 3DL    | -                     | TaMAPK24 <sup>5</sup>   |                                                                                                     |
| <b>TaMPK20-5</b>                 | KR422426 <sup>GB</sup>             | -      | AKL80628              | -                       |                                                                                                     |
|                                  | tplb0009i20 <sup>TRI</sup>         | -      | -                     | TaMPK7 <sup>6-8</sup>   |                                                                                                     |
|                                  | 001596_AA0032670.1 <sup>EP</sup>   | 1AL    | -                     | TaMAPK41 <sup>5</sup>   |                                                                                                     |

| Gene Name                          | Nucleotide                                             | Loc                                | Protein  | Reported Names                  | Comments                                                                                      |
|------------------------------------|--------------------------------------------------------|------------------------------------|----------|---------------------------------|-----------------------------------------------------------------------------------------------|
|                                    | 032512_AA0130820.2 <sup>EP</sup>                       | 1BL                                | -        | <i>TaMAPK29</i> <sup>5</sup>    |                                                                                               |
|                                    | 643598_AA2133390.1 <sup>EP</sup>                       | U                                  | -        | <i>TaMAPK33</i> <sup>5</sup>    |                                                                                               |
| <i>TaMPK21-1</i>                   | KR422427 <sup>GB</sup>                                 | -                                  | AKL80629 | -                               |                                                                                               |
|                                    | Ta.18660 <sup>GB</sup>                                 | -                                  | -        | <i>TaMAPK12</i> <sup>2</sup>    |                                                                                               |
|                                    | tplb0009k03 <sup>TRI</sup>                             | -                                  | -        | <i>TaMPK17</i> <sup>6-8</sup>   |                                                                                               |
|                                    | 002281_AA0040420.1.X <sup>EP</sup>                     | 1AL                                | -        | <i>TaMAPK42</i> <sup>5</sup>    |                                                                                               |
|                                    | 032784_AA0134120.1 <sup>EP</sup>                       | 1BL                                | -        | -                               |                                                                                               |
|                                    | 061695_AA0201870.1 <sup>EP</sup>                       | 1DL                                | -        | <i>TaMAPK5</i> <sup>5</sup>     |                                                                                               |
| <i>TaMPK21-2</i>                   | AK330685 <sup>GB</sup>                                 | -                                  | -        | <i>TaMAPK13</i> <sup>2</sup>    |                                                                                               |
|                                    | RFL_contig1494 <sup>TRI</sup>                          | -                                  | -        | <i>TaMPK16</i> <sup>6-8</sup>   |                                                                                               |
|                                    | 196288_AA0659130.2 <sup>EP</sup>                       | 3AL                                | -        | <i>TaMAPK40</i> <sup>5</sup>    |                                                                                               |
|                                    | 221708_AA0748020.2 <sup>EP</sup>                       | 3B                                 | -        | -                               |                                                                                               |
|                                    | 249051_AA0836180.1 <sup>EP</sup>                       | 3DL                                | -        | <i>TaMAPK23</i> <sup>5</sup>    |                                                                                               |
| <i>TaMPK24</i>                     | AK334728 <sup>GB</sup>                                 | -                                  | -        | <i>TaMPK12;1</i> <sup>6-8</sup> |                                                                                               |
|                                    | Ta.68224 <sup>GB</sup>                                 | -                                  | -        | <i>TaMAPK15</i> <sup>2</sup>    |                                                                                               |
|                                    | RFL_contig5132 <sup>TRI</sup>                          | -                                  | -        | -                               |                                                                                               |
|                                    | 640751_AA2072490.1.X + AA2072480.1.X <sup>EP</sup>     | U                                  | -        | <i>TaMAPK35</i> <sup>5</sup>    | Fusion of 2 accessions; Unidentified nucleotides (presumably 28 residue stretch) in PK domain |
|                                    | 513631_AA1646180.1 <sup>EP</sup>                       | 6BS                                | -        | <i>TaMAPK17</i> <sup>5</sup>    |                                                                                               |
|                                    | 543835_AA1744530.1 <sup>EP</sup>                       | 6DS                                | -        | <i>TaMAPK44</i> <sup>5</sup>    |                                                                                               |
| <i>TaMPK25</i>                     | 375843_AA1227850.X <sup>EP</sup>                       | 5AL                                | -        | -                               |                                                                                               |
|                                    | 405765_AA1334990.1 <sup>EP</sup>                       | 5BL                                | -        | -                               |                                                                                               |
|                                    | *TGACv1_Scaffold_433177_5DL:99000-100916 <sup>EP</sup> | 5DL                                | -        | -                               |                                                                                               |
|                                    | 290148_AA0982230.1 <sup>EP</sup>                       | 4AL                                | -        | -                               |                                                                                               |
| <i>TaMKK1-1</i>                    | 570427_AA1835590.1.X <sup>EP</sup>                     | 7AS                                | -        | -                               |                                                                                               |
|                                    | HP624471 <sup>GB</sup>                                 | -                                  | -        | -                               | Coding sequences share 100% identity                                                          |
|                                    | 622118_AA2033130.2 <sup>EP</sup>                       | 7DS                                | -        | -                               |                                                                                               |
| <i>TaMKK1-2</i>                    | HP621269 <sup>GB</sup>                                 | -                                  | -        | -                               |                                                                                               |
|                                    | 485693_AA1550190.1.X <sup>EP</sup>                     | 6AS                                | -        | -                               |                                                                                               |
| <b>Wheat MKKs</b>                  |                                                        |                                    |          |                                 |                                                                                               |
| <i>TaMKK1-1</i>                    | 290148_AA0982230.1 <sup>EP</sup>                       | 4AL                                | -        | -                               |                                                                                               |
|                                    | 570427_AA1835590.1.X <sup>EP</sup>                     | 7AS                                | -        | -                               |                                                                                               |
|                                    | HP624471 <sup>GB</sup>                                 | -                                  | -        | -                               | Coding sequences share 100% identity                                                          |
|                                    | 622118_AA2033130.2 <sup>EP</sup>                       | 7DS                                | -        | -                               |                                                                                               |
| <i>TaMKK1-2</i>                    | HP621269 <sup>GB</sup>                                 | -                                  | -        | -                               |                                                                                               |
|                                    | 485693_AA1550190.1.X <sup>EP</sup>                     | 6AS                                | -        | -                               |                                                                                               |
|                                    | 513382_AA1639520.1.X <sup>EP</sup>                     | 6BS                                | -        | -                               |                                                                                               |
| <i>TaMKK1-3</i>                    | 644387_AA2139180.1.X <sup>EP</sup>                     | U                                  | -        | -                               |                                                                                               |
|                                    | 623511_AA2053970.1.X <sup>EP</sup>                     | 7DS                                | -        | -                               |                                                                                               |
|                                    | 228257_AA0826360.1.X <sup>EP</sup>                     | 3B                                 | -        | -                               | Partial sequence                                                                              |
| <i>TaMKK3</i>                      | KT187393 <sup>GB</sup>                                 | -                                  | AKS50325 | -                               |                                                                                               |
|                                    | 405566_AA1330480.6.X <sup>EP</sup>                     | 5BL                                | -        | <i>TaMAPKK2</i> <sup>5</sup>    |                                                                                               |
|                                    | 432926_AA1394740.1 <sup>EP</sup>                       | 5DL                                | -        | <i>TaMAPKK13</i> <sup>5</sup>   |                                                                                               |
|                                    | <i>TaMKK3-3</i>                                        | 373997_AA1187200.3.X <sup>EP</sup> | 5AL      | -                               | <i>TaMAPKK4</i> <sup>5</sup>                                                                  |
| 405070_AA1319320.2.X <sup>EP</sup> |                                                        | 5BL                                | -        | <i>TaMAPKK18</i> <sup>5</sup>   |                                                                                               |

| Gene Name          | Nucleotide                           | Loc | Protein | Reported Names                                  | Comments                      |
|--------------------|--------------------------------------|-----|---------|-------------------------------------------------|-------------------------------|
|                    | 435057_AA1445420.4 <sup>EP</sup>     | 5DL | -       | TaMAPKK3 <sup>5</sup>                           |                               |
| <b>TaMKK4</b>      | 472053_AA1517260.1.X <sup>EP</sup>   | 6AL | -       | -                                               | Described in Ensembl as ncRNA |
|                    | 502626_AA1625820.1 <sup>EP</sup>     | 6BL | -       | -                                               |                               |
|                    | 528809_AA1716310.1.X <sup>EP</sup>   | 6DL | -       | TaMAPKK1 <sup>5</sup>                           |                               |
| <b>TaMKK5</b>      | 572257_AA1851770.1 <sup>EP</sup>     | 7AS | -       | -                                               |                               |
|                    | 592906_AA1946090.1 <sup>EP</sup>     | 7BS | -       | -                                               |                               |
|                    | 623332_AA2052160.1.X <sup>EP</sup>   | 7DS | -       | -                                               |                               |
| <b>TaMKK6</b>      | AK330201 <sup>GB</sup>               | -   | -       | TaMPKK1 <sup>6-8</sup>                          |                               |
|                    | 290485_AA0985860.1 <sup>EP</sup>     | 4AL | -       | MKK6 <sup>EP</sup>                              |                               |
|                    | 320624_AA1044950.2 <sup>EP</sup>     | 4BL | -       | MKK6 <sup>EP</sup>                              |                               |
|                    | 342786_AA1122060.5 <sup>EP</sup>     | 4DL | W5EJ68  | MKK6 <sup>EP</sup>                              |                               |
| <b>TaMKK10-2</b>   | 307146_AA1017600.1 <sup>EP</sup>     | 4AS | -       | -                                               |                               |
|                    | 323005_AA1073590.1 <sup>EP</sup>     | 4BL | -       | -                                               |                               |
|                    | 344093_AA1143600.1 <sup>EP</sup>     | 4DL | -       | -                                               |                               |
| <b>TaMKK10-1/3</b> | 288275_AA0943400.1.1 <sup>EP</sup>   | 4AL | -       | TaMAPKK17 <sup>5</sup>                          |                               |
|                    | 327917_AA1078630.1.1.X <sup>EP</sup> | 4BS | -       | -                                               |                               |
|                    | 328797_AA1093760.1.1 <sup>EP</sup>   | 4BS | -       | TaMAPKK7 <sup>5</sup>                           |                               |
|                    | 328797_AA1093770.1.1.X <sup>EP</sup> | 4BS | -       | TaMAPKK7 <sup>5</sup>                           |                               |
|                    | 329516_AA1102150.1.1 <sup>EP</sup>   | 4BS | -       | TaMAPKK6 <sup>5</sup>                           |                               |
|                    | 329775_AA1103890.1.1 <sup>EP</sup>   | 4BS | -       | -                                               |                               |
|                    | 362002_AA1175570.1.1 <sup>EP</sup>   | 4DS | -       | TaMAPKK12 <sup>5</sup>                          |                               |
|                    | 362154_AA1177260.1.1 <sup>EP</sup>   | 4DS | -       | -                                               |                               |
| <b>TaMKK10-4</b>   | 220919_AA0723740.1.1 <sup>EP</sup>   | 3B  | -       | TaMAPKK9 <sup>5</sup><br>TaMAPKK10 <sup>5</sup> |                               |
|                    | 289532_AA0972640.1.1 <sup>EP</sup>   | 4AL | -       | TaMAPKK14 <sup>5</sup>                          |                               |
|                    | 291020_AA0991400.1 <sup>EP</sup>     | 4AL | -       | TaMAPKK15 <sup>5</sup>                          |                               |
|                    | 329491_AA1101870.1.1 <sup>EP</sup>   | 4BS | -       | TaMAPKK5 <sup>5</sup>                           |                               |
|                    | 361832_AA1173360.1 <sup>EP</sup>     | 4DS | -       | -                                               |                               |
| <b>TaMKK10-5</b>   | 292438_AA0998860.1 <sup>EP</sup>     | 4AL | -       | TaMAPKK16 <sup>5</sup>                          |                               |
|                    | 331242_AA1109740.1 <sup>EP</sup>     | 4BS | -       | -                                               |                               |
|                    | 362002_AA1175550.1.1 <sup>EP</sup>   | 4DS | -       | TaMAPKK11 <sup>5</sup>                          |                               |

#### Notes:

- **Nucleotide** - Accessions were collected from EP (Ensembl Plants, <http://plants.ensembl.org/index.html>), GB (GenBank, <https://www.ncbi.nlm.nih.gov/genbank/>), or TRI (Triticeae Full-length CDS database, <http://trifldb.psc.riken.jp/v3/index.pl>). Abbreviated nucleotide identifiers were used for EP accessions (for full gene identifiers refer to Additional File 2) which should be preceded with 'TRIAE\_CS42\_CN\_TGACv1\_', where CN refers to the chromosome number as defined under location. In some cases where nucleotide sequences were identified in EP, accessions were not available—in these instance, genomic locations are provided under Nucleotide instead. Sequences for which alternative splicing is proposed are include the suffix 'X' at the end of the nucleotide identifier.
- **Loc** (location) - Gene sequence were located on chromosomes 1-7 of the A, B and D genomes of *Triticum aestivum*. U refers to unknown location, where U is followed by a number if more than one orthologue was identified with unknown location. Location is not available (-) for sequences obtained from GB or TRI.
- **Protein** - GB or UniProt (Ensembl) protein accessions.
- **Reported Names** - Other names that have been assigned in GB, EP or according to references (marked with superscript numbers). EP names were assigned to the genes where MPKs and MKKs are spelled out ('mitogen activated protein kinase' and 'mitogen activated protein kinase kinase', respectively; note that in some cases UniProt sequence was assigned a different MPK/MKK number than that assigned to the gene.

## Barley (*Hordeum vulgare*)

| Gene Name          | Nucleotide                                                     | Loc | Protein  | Reported Names                 | Comments                              |
|--------------------|----------------------------------------------------------------|-----|----------|--------------------------------|---------------------------------------|
| <b>Barley MPKs</b> |                                                                |     |          |                                |                                       |
| <i>HvMPK3</i>      | MLOC_17814.3 <sup>EP</sup>                                     | 4   | M0V3Q0   | <i>MPK3</i> <sup>EP</sup>      | Coding sequences share 100% identity  |
|                    | Locus_5782_Transcript_3/3_Confidence_0.864 <sup>HW</sup>       | -   | -        | <i>HvMPK5</i> <sup>14</sup>    |                                       |
| <i>HvMPK4</i>      | AK366765 <sup>GB</sup>                                         | -   | BAJ97968 | <i>HvMPK6</i> <sup>14</sup>    | Coding sequences share 100% identity  |
|                    | MLOC_5653.1 <sup>EP</sup>                                      | 1   | F2DS97   | -                              |                                       |
| <i>HvMPK6</i>      | AK355058 <sup>GB</sup>                                         | -   | BAJ86277 | <i>HvMPK1</i> <sup>14</sup>    | Proteins share 100% sequence identity |
|                    | AK376245 <sup>GB</sup>                                         | -   | BAK07440 | -                              |                                       |
|                    | AK359140 <sup>GB</sup>                                         | -   | BAJ90351 | -                              |                                       |
|                    | *7:33935418-33937780(-) <sup>EP</sup>                          | 7   | -        | -                              |                                       |
| <i>HvMPK7</i>      | AK252980 <sup>GB</sup>                                         | -   | -        | <i>HvMPK4</i> <sup>14,15</sup> | Coding sequences share 100% identity  |
|                    | MLOC_74277.1 <sup>EP</sup>                                     | 7   | M0YY17   | -                              |                                       |
| <i>HvMPK11</i>     | AK364586 <sup>GB</sup>                                         | -   | BAJ95789 | <i>HvMPK2</i> <sup>14</sup>    | Coding sequences share 100% identity  |
|                    | MLOC_71588.1 <sup>EP</sup>                                     | 7   | M0YQ06   | -                              |                                       |
| <i>HvMPK14</i>     | AK353742 <sup>GB</sup>                                         | -   | BAJ84961 | <i>HvMPK3</i> <sup>14</sup>    | Coding sequences share 100% identity  |
|                    | AK354217 <sup>GB</sup>                                         | -   | BAJ85436 | -                              |                                       |
|                    | MLOC_44271.1 <sup>EP</sup>                                     | 6   | F2CQ40   | -                              |                                       |
| <i>HvMPK16</i>     | AK356908 <sup>GB</sup>                                         | -   | BAJ88123 | -                              | Coding sequences share 100% identity  |
|                    | AK354221 <sup>GB</sup>                                         | -   | -        | -                              |                                       |
|                    | AK251500 <sup>GB</sup>                                         | -   | -        | <i>HvMPK14</i> <sup>14</sup>   |                                       |
|                    | MLOC_60926.2 <sup>EP</sup>                                     | 1   | M0XKT1   | <i>MPK16</i> <sup>EP</sup>     |                                       |
| <i>HvMPK17</i>     | AK252439 <sup>GB</sup>                                         | -   | -        | -                              | Proteins share 100% sequence identity |
|                    | AK376500 <sup>GB</sup>                                         | -   | BAK07695 | -                              |                                       |
|                    | MLOC_31474.2 <sup>EP</sup>                                     | 7   | F2EK23   | -                              |                                       |
| <i>HvMPK20-1</i>   | AK252802 <sup>GB</sup>                                         | U   | -        | -                              | Partial or chimeric sequence?         |
| <i>HvMPK20-2</i>   | AK361158 <sup>GB</sup>                                         | -   | BAJ92365 | <i>HvMPK9</i> <sup>14</sup>    | Coding sequences share 100% identity  |
|                    | AK361419 <sup>GB</sup>                                         | -   | -        | -                              |                                       |
|                    | MLOC_64743.1 <sup>EP</sup>                                     | 1   | F2DB94   | -                              |                                       |
| <i>HvMPK20-3</i>   | Locus_4929_Transcript_3/3_Confidence_0.714 <sup>HW</sup>       | -   | -        | <i>HvMPK11</i> <sup>14</sup>   |                                       |
| <i>HvMPK20-4</i>   | AK365649 <sup>GB</sup>                                         | -   | BAJ96852 | -                              | Coding sequences share 100% identity  |
|                    | AK365810 <sup>GB</sup>                                         | -   | BAJ97013 | -                              |                                       |
|                    | MLOC_4609.1 <sup>EP</sup>                                      | 3   | F2DP31   | -                              |                                       |
| <i>HvMPK20-5</i>   | AK357581 <sup>GB</sup>                                         | -   | BAJ88795 | <i>HvMPK7</i> <sup>14</sup>    | Coding sequences share 100% identity  |
|                    | MLOC_36752.2 <sup>EP</sup>                                     | 1   | F2D124   | -                              |                                       |
| <i>HvMPK21-1</i>   | AK377157 <sup>GB</sup>                                         | -   | BAK08351 | <i>HvMPK17</i> <sup>14</sup>   | Chimeric sequence?                    |
|                    | MLOC_11730.2.X <sup>EP</sup>                                   | 1   | M0UKB5   | -                              |                                       |
| <i>HvMPK21-2</i>   | AK373134 <sup>GB</sup>                                         | -   | BAK04331 | <i>HvMPK16</i> <sup>14</sup>   |                                       |
| <i>HvMPK24</i>     | *6:62507485-62509104(1) + 6:47704546-47706434(-) <sup>EP</sup> | 6   | -        | -                              | Fusion of 2 chromosomal regions       |
| <i>HvMPK25</i>     | *5:449484666-449486231(-) <sup>EP</sup>                        | 5   | -        | -                              |                                       |
| <b>Barley MKKs</b> |                                                                |     |          |                                |                                       |
| <i>HvMKK1-1</i>    | MLOC_5024.1 <sup>EP</sup>                                      | 7   | M0WE95   | -                              |                                       |

| Gene Name          | Nucleotide                                                                                        | Loc | Protein     | Reported Names                 | Comments                                                                                                                                                                       |
|--------------------|---------------------------------------------------------------------------------------------------|-----|-------------|--------------------------------|--------------------------------------------------------------------------------------------------------------------------------------------------------------------------------|
| <i>HvMKK1-2</i>    | *6:24836464-24837555(-) <sup>EP</sup>                                                             | 6   | -           | -                              | Partial sequence; N-terminal region found in GenBank accession AC264970.1                                                                                                      |
| <i>HvMKK3-2</i>    | AK364882 <sup>GB</sup>                                                                            | -   | BAJ96085    | -                              | Partial PK domain                                                                                                                                                              |
|                    | AB598128 <sup>GB</sup>                                                                            |     | BAU62004    | <i>HvMKK3</i> <sup>GB,16</sup> |                                                                                                                                                                                |
|                    | MLOC_51567.4.X +<br>*5:556255205-556260000(-) <sup>EP</sup>                                       | 5   | M0WHK8      | <i>MKK3</i> <sup>EP</sup>      | Fusion of accession with downstream sequence shows homology with other Triticeae MKK3-2 sequences. Protein accession (M0WHK8) represents translated sequence from MLOC_51567.4 |
| <i>HvMKK3-3</i>    | *5:282831404-282831930(-) +<br>5:85174242-85175936(+) +<br>5:111354822-111355452(-) <sup>EP</sup> | 5   | -           | -                              | Fusion of 3 chromosomal regions                                                                                                                                                |
| <i>HvMKK4</i>      | AK374401 <sup>GB</sup>                                                                            | -   | see comment | -                              | Predicted protein (BAK05597) is in frame with translated sequence but is missing the N-terminal region reported herein                                                         |
|                    | *6:510407310-510408104(+) <sup>EP</sup>                                                           | 6   | -           | -                              | Partial (N-term truncation)                                                                                                                                                    |
| <i>HvMKK5</i>      | AK370268 <sup>GB</sup>                                                                            | -   | see comment | -                              | Predicted protein (BAK04169) is translated in the wrong frame                                                                                                                  |
|                    | *7:71862432-71862578(+) +<br>MLOC_21954.1.X <sup>EP</sup>                                         | 7   | -           | -                              | Fusion of accession with upstream sequence; missing sequence between accession and upstream sequence provided, but the sequences have homologies to AK370268.                  |
| <i>HvMKK6</i>      | AK250233 <sup>GB</sup>                                                                            | -   | -           | -                              |                                                                                                                                                                                |
|                    | MLOC_4417.1.X +<br>*4:519072245-519072491(-) <sup>EP</sup>                                        | 4   | -           | <i>MKK6</i> <sup>EP</sup>      | Fusion of accession with downstream sequence                                                                                                                                   |
| <i>HvMKK10</i>     | MLOC_58682.1.X <sup>EP</sup>                                                                      | 1   | -           | -                              | Partial sequence                                                                                                                                                               |
| <i>HvMKK10-2</i>   | AK363295 <sup>GB</sup>                                                                            | -   | BAJ94499    | -                              |                                                                                                                                                                                |
|                    | MLOC_77796.1.X <sup>EP</sup>                                                                      | 4   | -           | -                              | Partial sequence                                                                                                                                                               |
| <i>HvMKK10-1/3</i> | *morex_contig_1636696:1-1144(+) <sup>EP</sup>                                                     | U   | -           | -                              | Partial sequence                                                                                                                                                               |
| <i>HvMKK10-4</i>   | *4:23822500-23823800(-) <sup>EP</sup>                                                             | 4   | -           | -                              |                                                                                                                                                                                |
| <i>HvMKK10-5</i>   | *4:23881977-23883581(-) <sup>EP</sup>                                                             | 4   | -           | -                              |                                                                                                                                                                                |

#### Notes:

- **Nucleotide** - Accessions were collected from EP (Ensembl Plants, <http://plants.ensembl.org/index.html>), GB (GenBank, <https://www.ncbi.nlm.nih.gov/genbank/>), or HW (HarvEST:Web, <http://harvest-web.org/hweb/utimenu.wc>). For nucleotide sequences identified in EP, but accessions were not available, genomic locations are provided instead, and marked with an asterisk. Sequences for which alternative splicing is proposed include the suffix 'X' at the end of the nucleotide identifier.
- **Loc** (location) - Gene sequence were located on chromosomes 1-7 of H genome (*Hordeum vulgare*). Location is not available (-) for sequences obtained from GB or HW.
- **Protein** - GB or UniProt (Ensembl) protein accessions.
- **Reported Names** - Other names that have been assigned in GB, EP or according to references (marked with superscript numbers). EP names were assigned to the genes where MPKs and MKKs are spelled out ('mitogen activated protein kinase' and 'mitogen activated protein kinase kinase', respectively; note that in some cases UniProt sequence was assigned a different MPK/MKK number than that assigned to the gene.

## Rye (*Secale cereale*)

| Gene Name        | Nucleotide   | Comments                                                              |
|------------------|--------------|-----------------------------------------------------------------------|
| <b>Rye MPKs</b>  |              |                                                                       |
| <i>ScMPK3</i>    | GCJW01013649 |                                                                       |
| <i>ScMPK4</i>    | GCJW01021504 |                                                                       |
| <i>ScMPK6</i>    | GCJW01029298 |                                                                       |
| <i>ScMPK7</i>    | GCJW01012233 |                                                                       |
| <i>ScMPK11</i>   | GCJW01021982 |                                                                       |
| <i>ScMPK14</i>   | GCJW01021899 |                                                                       |
| <i>ScMPK17</i>   | GCJW01009290 |                                                                       |
| <i>ScMPK20-1</i> | GCJW01023871 |                                                                       |
| <i>ScMPK20-2</i> | GCJW01009928 |                                                                       |
| <i>ScMPK20-3</i> | GCJW01009952 |                                                                       |
| <i>ScMPK20-4</i> | GCJW01023593 |                                                                       |
| <i>ScMPK20-5</i> | GCJW01010817 |                                                                       |
| <i>ScMPK21</i>   | GCJW01028630 |                                                                       |
| <i>ScMPK24</i>   | GCJW01027829 | Re-amplified sequence does not have stop codon as reported in GenBank |
| <i>ScMPK25</i>   | GCJW01029388 |                                                                       |
| <b>Rye MKKs</b>  |              |                                                                       |
| <i>ScMKK1</i>    | GCJW01014171 |                                                                       |
| <i>ScMKK3-2</i>  | GCJW01010230 |                                                                       |
| <i>ScMKK3-3</i>  | GCJW01028545 |                                                                       |
| <i>ScMKK4</i>    | GCJW01029276 |                                                                       |
| <i>ScMKK5</i>    | GCJW01029147 | Partial sequence                                                      |
| <i>ScMKK6</i>    | GCJW01013226 |                                                                       |
| <i>ScMKK10</i>   | GCJW01031072 | Partial sequence                                                      |

**Note:** Nucleotide accessions were collected from GeneBank's Transcript Assembly (TSA) database. Bioproject PRJDB2278 [16].



## Triticale (*xTritosecale*)

| Gene Name             | Nucleotide   | Loc   | Comments                                                                                                                                         |
|-----------------------|--------------|-------|--------------------------------------------------------------------------------------------------------------------------------------------------|
| <b>Triticale MPKs</b> |              |       |                                                                                                                                                  |
| <i>TsMPK3</i>         | Contig10429  | R/A/B |                                                                                                                                                  |
| <i>TsMPK4</i>         | Contig67966  | R/A   | Re-amplified sequence does not have stop codon reported in contig file                                                                           |
| <i>TsMPK6</i>         | Contig251617 | R     |                                                                                                                                                  |
| <i>TsMPK7</i>         | Contig199810 | B     |                                                                                                                                                  |
| <i>TsMPK11</i>        | Contig120398 | U     |                                                                                                                                                  |
|                       | Contig88156  | A     |                                                                                                                                                  |
| <i>TsMPK14</i>        | Contig220413 | R/B   |                                                                                                                                                  |
| <i>TsMPK16</i>        | Contig209684 | U1    |                                                                                                                                                  |
|                       | Contig244429 | U2    |                                                                                                                                                  |
| <i>TsMPK17</i>        | Contig26009  | R     |                                                                                                                                                  |
|                       | Contig75139  | A     |                                                                                                                                                  |
|                       | Contig38651  | U     |                                                                                                                                                  |
| <i>TsMPK20-1</i>      | Contig53750  | U1    |                                                                                                                                                  |
|                       | Contig64364  | U2    | Multiple stop codons                                                                                                                             |
|                       | Contig185846 | U3    |                                                                                                                                                  |
| <i>TsMPK20-2</i>      | Contig111052 | U1    | Deletion or sequencing error; single nucleotide (T) missing in sequence leads to disruption of full length MAPK sequence (see Additional File 5) |
|                       | Contig113411 | U2    |                                                                                                                                                  |
| <i>TsMPK20-3</i>      | Contig68811  | U     |                                                                                                                                                  |
|                       | Contig19795  | B     |                                                                                                                                                  |
| <i>TsMPK20-4</i>      | Contig251629 | U     |                                                                                                                                                  |
| <i>TsMPK20-5</i>      | Contig67306  | U1    |                                                                                                                                                  |
|                       | Contig67307  | U2    |                                                                                                                                                  |
| <i>TsMPK21-1</i>      | Contig53625  | U     | Partial sequence                                                                                                                                 |
| <i>TsMPK21-2</i>      | Contig68757  | U1    |                                                                                                                                                  |
|                       | Contig201182 | U2    |                                                                                                                                                  |
|                       | Contig221182 | U3    |                                                                                                                                                  |
| <i>TsMPK24</i>        | Contig116794 | U     |                                                                                                                                                  |
| <i>TsMPK25</i>        | Contig146788 | U     |                                                                                                                                                  |
| <b>Triticale MPKs</b> |              |       |                                                                                                                                                  |
| <i>TsMKK3-2</i>       | Contig143511 | B     |                                                                                                                                                  |
|                       | Contig224242 | U1    |                                                                                                                                                  |
|                       | Contig229009 | U2    |                                                                                                                                                  |
| <i>TsMKK3-3</i>       | Contig90697  | U     |                                                                                                                                                  |
| <i>TsMKK4</i>         | Contig104479 | U1    |                                                                                                                                                  |
| <i>TsMKK5</i>         | Contig141775 | U2    |                                                                                                                                                  |
|                       | Contig154845 | U3    |                                                                                                                                                  |
| <i>TsMKK6</i>         | Contig212597 | R     |                                                                                                                                                  |
| <i>TsMKK10</i>        | Contig129481 | -     | Partial sequence                                                                                                                                 |

**Note:** Nucleotide accessions were collected from a TSA project not yet available in GenBank [17]; Locations predicted based on homologies with wheat and rye sequences, where U = unknown.

## Goat Grass (*Aegilops tauschii*)

| Gene Name              | Nucleotide                    | Protein | Reported Names | Comments         |
|------------------------|-------------------------------|---------|----------------|------------------|
| <b>Goat Grass MPKs</b> |                               |         |                |                  |
| <i>AetMPK3</i>         | EMT08915.X                    | -       | <i>MPK3</i>    |                  |
| <i>AetMPK4</i>         | EMT33725.X                    | -       | <i>MPK6</i>    |                  |
| <i>AetMPK6</i>         | EMT30535.X                    | -       | <i>MPK1</i>    |                  |
| <i>AetMPK7</i>         | EMT18927                      | R7W9L5  | -              |                  |
| <i>AetMPK11</i>        | EMT18008.X                    | -       | -              |                  |
| <i>AetMPK14</i>        | EMT33478.X                    | -       | <i>MPK3</i>    |                  |
| <i>AetMPK16</i>        | EMT19997.X                    | -       | <i>MPK16</i>   |                  |
| <i>AetMPK17</i>        | EMT12771.X                    | -       | -              |                  |
| <i>AetMPK20-1</i>      | EMT32532.X                    | -       | <i>MPK10</i>   |                  |
| <i>AetMPK20-2</i>      | EMT15153.X                    | -       | -              |                  |
| <i>AetMPK20-3</i>      | EMT10986.X                    | -       | <i>MPK11</i>   |                  |
| <i>AetMPK20-4</i>      | EMT09350.X                    | -       | <i>MPK8</i>    |                  |
| <i>AetMPK20-5</i>      | EMT10806.X                    | -       | <i>MPK7</i>    |                  |
| <i>AetMPK21-1</i>      | EMT25710.X                    | -       | <i>MPK17</i>   |                  |
| <i>AetMPK21-2</i>      | EMT27546.X                    | -       | <i>MPK16</i>   |                  |
| <i>AetMPK24</i>        | EMT28412.X                    | -       | -              |                  |
| <i>AetMPK25</i>        | EMT00145.X                    | -       | -              |                  |
| <b>Goat Grass MPKs</b> |                               |         |                |                  |
| <i>AetMKK1-1</i>       | *Scaffold59969:73755-76762(-) | -       | -              |                  |
| <i>AetMKK1-2</i>       | EMT27166.X                    | -       | <i>MKK1</i>    |                  |
| <i>AetMKK3</i>         | EMT30937.X + EMT30938.X       | -       | <i>MKK1</i>    |                  |
| <i>AetMKK3-2</i>       | EMT25805.X                    | -       | <i>MKK6</i>    |                  |
| <i>AetMKK4</i>         | EMT05580.X                    | -       | <i>MKK4</i>    |                  |
| <i>AetMKK5</i>         | EMT03871.X                    | -       | <i>MKK4</i>    |                  |
| <i>AetMKK6</i>         | EMT19002.X                    | -       | <i>MKK6</i>    |                  |
| <i>AetMKK10-5</i>      | EMT23048.X                    | -       | <i>MKK4</i>    | Partial Sequence |
| <i>AetMKK10</i>        | EMT19304.X                    | -       | -              | Partial Sequence |

**Note:** Nucleotide and protein accessions and reported names from Ensembl Plants.

## Red Wild Eincorn (*Triticum urartu*)

| Gene Name                    | Nucleotide           | Protein | Reported Names | Comments                                                                                                                     |
|------------------------------|----------------------|---------|----------------|------------------------------------------------------------------------------------------------------------------------------|
| <b>Red Wild Einkorn MPKs</b> |                      |         |                |                                                                                                                              |
| <i>TuMPK3</i>                | TRIUR3_20327-T1.X    | -       | <i>MPK5</i>    |                                                                                                                              |
| <i>TuMPK7</i>                | TRIUR3_17440-T1      | M8A8M9  | <i>MPK4</i>    |                                                                                                                              |
| <i>TuMPK11</i>               | TRIUR3_30143-T1      | M7ZEQ4  | <i>MPK2</i>    |                                                                                                                              |
| <i>TuMPK14</i>               | TRIUR3_09881-T1      | M7ZYV1  | <i>MPK3</i>    |                                                                                                                              |
| <i>TuMPK16</i>               | TRIUR3_00870-T1.X    | -       | <i>MPK14</i>   |                                                                                                                              |
| <i>TuMPK17</i>               | TRIUR3_13756-T1.X    | -       | <i>MPK12</i>   | Partial sequence                                                                                                             |
| <i>TuMPK20-1</i>             | TRIUR3_21548-T1.X    | -       | <i>MPK10</i>   |                                                                                                                              |
| <i>TuMPK20-2</i>             | TRIUR3_19922-T1.X    | -       | <i>MPK9</i>    |                                                                                                                              |
| <i>TuMPK20-3</i>             | TRIUR3_18187-T1.X    | -       | <i>MPK11</i>   |                                                                                                                              |
| <i>TuMPK20-4</i>             | TRIUR3_32310-T1.X    | -       | <i>MPK8</i>    |                                                                                                                              |
| <i>TuMPK21</i>               | TRIUR3_01866-T1      | M8A5Z4  | <i>MPK17</i>   |                                                                                                                              |
| <i>TuMPK24</i>               | TRIUR3_08179-T1.X    | -       | <i>MPK13</i>   |                                                                                                                              |
| <b>Red Wild Einkorn MKKs</b> |                      |         |                |                                                                                                                              |
| <i>TuMKK1-1</i>              | TRIUR3_03040-T1.X    | -       | <i>MKK1</i>    |                                                                                                                              |
| <i>TuMKK1-2</i>              | TRIUR3_10169-T1.X    | -       |                | Described in Ensembl as nontranslating CDS                                                                                   |
| <i>TuMKK3</i>                | TRIUR3_00549-T1.X    | -       | <i>MKK6</i>    | Partial sequence                                                                                                             |
| <i>TuMKK3-2</i>              | TRIUR3_07377-T1.X    | -       | <i>MKK6</i>    |                                                                                                                              |
| <i>TuMKK3-3</i>              | TRIUR3_10006 + 10007 | -       | <i>MKK1</i>    | Fusion of 2 accessions; 'Other name' associated with TRIUR_10006                                                             |
| <i>TuMKK4</i>                | TRIUR3_14235-T1.X    | -       | <i>MKK4</i>    |                                                                                                                              |
| <i>TuMKK5</i>                | TRIUR3_05471-T1.X    | -       | <i>MKK5</i>    |                                                                                                                              |
| <i>TuMKK6</i>                | TRIUR3_04435-T1      | M7YY42  | <i>MKK1</i>    | Stop codon not reported in Ensembl, but is found in 1 <sup>st</sup> three nucleotides downstream of proposed coding sequence |
| <i>TuMKK10-1/3</i>           | TRIUR3_19643-T1.X    | -       | <i>MKK4</i>    | Partial sequence                                                                                                             |
| <i>TuMKK10-4</i>             | TRIUR3_30060-T1.X    | -       | -              |                                                                                                                              |
| <i>TuMKK10</i>               | TRIUR3_19642-T1.X    | -       | -              | Partial sequence                                                                                                             |

**Note:** Nucleotide and protein accessions and reported names from Ensembl Plants.
