# Supplementary material for: Analysis of MAPK and MAPKK gene families in wheat and related Triticeae species
Source: PubMed Central journal article supplement (PMC5838963; doi:10.1186/s12864-018-4545-9), 2018-03-05
Supplement: 12864_2018_4545_MOESM6_ESM.pdf [file 12864_2018_4545_MOESM6_ESM.pdf]

**Additional File 6. Triticale MPK and MKK transcript sequences.** Transcripts were identified from an in-house transcript assembly library which has been submitted to GenBank by Laroche et al. *TsMPKs* and *TsMKKs* sequences are provided. Blue and red fonts are used to mark putative start and stop codons, respectively.

**>TsMPK3 : contig10429**

CTGATTATAAAATCTATTTCTTCGTAGACTAGAGAATGATTTGCTCTCAAATCATACTCCAAATTTTTTATTTCGCAT  
AGCCAAGGGACAAAGGCTGAAGAAGCAGCAACAACCTTACACGGAAACAAACAAATGCAGTGCGCAACCTACCA  
TGTTCTTTGATCTTACTCCTATTTACAGACAGTTTTACACCGAAATCATACTATTTGGGGTTGGGCAACTAGGAATG  
AATCGT**CTA**GTATCGGAAGTTGGGGTTCAACTCGAGGGCTTCGTTGAATATGAGCTGCTTCATCTGGTCTTCCGTCA  
GAGGGTGCTGCTCGAAGTCGAAGGAGAAGGGTCCGTGCAGATGGGCTCATCGGGCAGCTCGTAAGCCGCTCTAGG  
TACGGGTGCTCGAGCGCTCTTCAACTGTGATCCTTCGAGCGGGTTGAAGGTGAGCATCCTCTCGATGAGGTCCAG  
CGCGCGGGGTCACCTTGGGGAACTGTCCCGGGAAGGACCGGCGAGGAACTGCGGCAGGTGCCTCATGTACCTCC  
TGGCGTCTCGTTCGGATGAAGCCAGGTCGTGCTCGGTGGGGTGGCGATCACCTCCGTGATGAGCCGCATCTGG  
TGCAATGGTCCCTCCCGGGAAGAGCGGCGCGGTTGATGAGCTCCATGAAGATGCAGCCGACGGACCAGACGTC  
GATGGCGGCCGAGTAGTCGGTGGAGTTGAGCAGCAGCTCCGGGGCCCGTACCACCGGTGACCACGTACTCCGTCA  
TCATGTCGCTCTCCGACGACGGCCGCGCAGGCCGAAGTCGCAGATCTTGAGGTGCGAGTTGGCGTTCAGTAGCAGG  
TTGCTCGGTTTCAGGTGCGGTTGGATCACGTTCCGCGAGTGGATGTACTTGAGGCGCGCAGCAGCTGGTACAGGAA  
GTACTGGCAGTGTCTTCTGAGAGTCTTGGTTGGAGCGGATGATGTGGTGGAGGTCCGTGCCATGAGCTCGGTGG  
CGATGTAGACCTCGTTGAAGACTGCGGGATCGCCGGCGGGATCACATCTCGGAGGCCACTATGTTCTCGTGGTCCG  
AGGTGCCTGAGGAGCTTGATCTCCCGAGCGTGCCTTGGCGTCCATGTTGTTGTCGAAGGCGTTTGGCATCTTCTT  
GATTGCCACCATCTCCCTCGTCTCGAAGTTCATCACGAGCAGACGATCCCGTAGGCGCCGCGGCCGATGGGCATGA  
TCGGCGGCTGGTACTTGGCCGTGATCTCGAAGTGGTTGCCAATATGTTGTAGAGGAGGAAGCGGCCGCGGTGCCTC  
ATCGTCCGCCGAACCTCGGCCACCGGAGCGCCGTC**CA**TCTCAAACAGCCAAGAACTCTCAAACCCCAATCACAGG  
AGGCAACACGCACGCACGCACCGCAACGGGATGAGGCTGATGAGCTGATGATTGACTTTATCTGGCTCTCGATTC  
TTGTAGGGGGGAAGAGGAGAGAATTATAAATAGAAAAGGGCGGCTCCGCTAATGCTCTTGGCCCA

**>TsMPK4 : contig67966**

TTTTGAGATAATAAAGGCAATATGTCAACTCAGATATACATGGGATGTTTAAATAAGTGTACACAAAATTACAAGC  
CTTAGATACACAAGAAGAAATTTTCAATCAACCGTATAATAACAAGCCAGGCGCAAGCCATCTCATACAAATGTC  
GTTTCTTCAGAAAGGCCCAAAAGAAATAGTTACAGCAACAATAATCCATGCCCAATTCGCCAATAAGCGAGCATA  
AAATAAATAGATGCACAAGACATGGAAATATCGGCTTCACTAGAGCTAGAGGTAGATCTTCAATGCCCTCAGCTGGT  
AATTTGGTCTTGGCTCTTAGTAGGGAGGATCAGGGTTAAATGCTAAAGTTTCCCTCCAGATGAGCTCTTTCATATGT  
TCTTCTGTAAAAGATGGTTGCTCAAATCAAAGCTGAAAGGTGCCGGCAAGTGGGTCTTTCATTGATGTCATGAAG  
AGAAGCCAAGTATGGGTGATGCAGAGCCTCATCAACAGTGATGCGTCTGCTTGGGTCAAACACCAGCATCTCTCTA  
ACAGATCAACTGCACCATCAGACATGTTGCGGAAGCGCAGGCGGAAGTCTGCCTTGGGTACTGTGGTAATTGCT**TC**  
**A**TGTATCTTCGTGCATTATCACTCCGAAGAAACCCAGGCTCGAATCATCTGGTATCCTATCAGCTCAGTGATCAAT  
TTTTAACTGTTGGATGTAATCTCTTCCAGGAAATAGGGTTGACGAGTAATAATTTACCAAGTATACACCCAACCTGA  
CCAGACATCAATAGCAGCAGTATATTGTGAACAGTTCAACAGCAACTCTGGTGCTCGGTACCAACGAGTGACCACAT  
ACTCTGTATGAGATCGGTTTCTGAAGTGGTCTTTCGAAGCCAAAGTCTGCAATCTTGAGATCGCAATTTGCGTTT  
AGGAACAAATGCTTGGCTTCAGATCACGGTGAAGACATTTGCTGAGTGCACATATTTAGCCCTCGAAGCAACTG  
ATACAAGAAGTACTGGCAATGGTCATCAGTCAATGATTTGATTTGAGCGAATGATCTGGTGGAGATCTGTGTCCATCA  
ACTCAGTAACAATGTACACATCTTAAAAATCATCTCTTCTTGGGGGGCGTATTAATCCTTTATGGCAAGAATATTC  
TCATGGTCCATGTGGCGAAGAAGCTTTATTTCTCTCAGCCTCGCTTGGCGTCGATGTGGTTGTCAAACGCATTTCC  
AATCTTCTTGTATCGCAACCTCCTCTCTGATCCGAACATAACCGCGCAGACAATGCCGTAGCGCCCTCGGCCGA  
TGGGGCGGATGGGAGGGGCGTACTTGGAGGCGACCTCGAAGAGGTTGCCGTAGACGTTGTAGAGCACGTAGCGGCCG  
CCGTGCGTCCATCCCTGGATCTGCGCGGCCCGCCCGCGCGCCGCGCCGCGCCGCGCCGAGGAT**CA**TGGCTC  
TTCGTCGCGGCTCGCGAGGGGGAGGAGCCGAGGAGGGGTGGAGAGTAGGGTTGGGTTCTAGGGTTGGTGTCTCCGGAG  
CGACTAGTCGTTTCATGGGCTGGGACTCTGGTGGAGAAGCTTCCCGGTTGATGTTTCTACTTGTGA

**>TsMPK6 : contig251617**

GCGGCGGCCGCGGCGGGGTCGGCGCCGGGCGGCGCG**GATG**GAGAACATCCAGGCCACGCTCACCCACGGCGGGGAGGTT  
CATCCAGTACAACATCTTCGGCAACGCTCTTCGAGGTCACCGCCAAGTACAAGCCCCCATCTCCCCATCGGCAAGG  
GCGCCTACGGCATCGTCTGCTCCGCGCTCAACTCCGAGACGGGGGAGCAGGTGGCCATCAAGAAGATCGCCAACGCC  
TTCGACAACAAGATCGACGCCAAGCGCACGCTGCGGGAGATCAAGCTGCTCCGCCACATGGACCACGAGAATATTGT  
TGCAATAAGGGATATTATACCTCCTGCACAAAGGACTGCATTTAATGATGTCTATATTGCATATGAATTGATGGACA  
CCGACCTGCATCAAATTATTTCGCTCAAATCAAGCTTTATCGGAGGAGCACTGCCAGTATTTCTTTTATCAGATCCTT  
CGTGGCTTGAAGTATATACATTAGCAAAATGTTCTCCACCAGACTTGAAGCCTAGCAATCTTCTTTTGAATGCAAA  
CTGTGACCTAAAAATTTGTGATTTTGGACTTGTCTGTACCCTCAGAACTGATTTTATGACCGAGTATGTTGTGA  
CAAGATGGTACAGGGCACAGAGCTTCTGTTGAACCTCCGAATATACTGCAGCAATTGATGTGTGGTCTGTGGGC  
TGTATATTTATGGAACATGATGGATCGGAAACCTTTGTTTCCGGGAAGAGACCATGTCCATCAGCTACGCCTACTAAT  
GGAGCTCATTGGAACACCAAATGAGGCCGATTTGGATTTTGTAAATGAAAATGCAAGAAGATATATCCGCCAACCTC  
CCCCTCATGCAAGGCAATCATTATCTGAGAAGTTTCCACATGTTCCACCCTCAGCAATTGACTTGGTTGAAAAGATG  
CTGACTTTCGATCCTAGACAGAGAATAACAGTTGAAGGCGCACTTGCGCATCCTTACTTGGCATCGCTGCATGACAT  
AAGTGATGAGCCAGTCTGCACAGTGCCTTTCAGCTTTGACTTCGAGCAGCATGCGTTGTCCGGAAGAACAATGAAG  
ATCTAATCCACCAAGAGGGCATCGCGTTCAACCCTGATTACCAG**TAGC**TGGAGTTCTTTGATCGGCTTCATTCATA  
TGGAAAGTTTTCGGTCTCCTGCCGCATAAAATGTGCTAGCTGTAAATAATTGCCACCCAGAGAAATCAAAAGG  
AGATGGCGTGTAAAGGGTAGATGACAAGAGCTGTGGTGGTCAAATTTCCGTGTAGCCTATGGATTCTTGTGCTTGTG  
TATGTTGTTTATGTGGATTTTTCCTTCTGCTGAAGATGTTTTCAGATTTTCCGTAAGATGCGATAGTCCGTG  
AACGATGGCTCCCTAAATTTCTGTGGCCCTCATGAGATTTTACATTTGCTGGTGGATTATGGATTATGTAATGTTGTC  
TGGTTAATGAACTCCGACTGACTGATTGGAATATTGTGTTGAATGCGGACTGACCGTGATTTAGTGGTTGCTGTTT  
GAAGTTGTAGA

**>TsMPK7 : contig199810**

ACTTGAAAGTTTAGACTCCTTACATAGAGCAGCTTCTAAAATTACAACCTACAATCATGGGAAAAGGGAATATTA  
CAACTTACACAAGCTTCTTCATAACCCAATTTCTTAATAAACCGAATTCGGCTTCTACAACACAGTAGTCCATATACA  
TAGAGCAGTGTCTAAGATTACAACCTTACAAATCAGGGGAAAAAGAGAGAAGATTACAACCTTACACAAGCTTCTTCA  
TAACCAGATTTCTGATAACCGAATTTCCGTTTCTACAACACAGTAGTCTATATATACTAGCAAGTACTGATCCACAGC  
TAGAGAAATCCATACGCCGTTTATGTGCACATATTTACATAAACAGGTCACCTCGACGGCATTGCGATAATTGCATT  
AAAGCTTTATATGAAGAACGAACATGTGAAGACCTGGTGTGGCACACTGCTCTCACATGTTTTCATTCTGCTT**TCA**  
CATATTCACCATCCTGGCGGCTCAGGGTGATACTGGAGCATCTCCTGCCACAACATTTCTCGGATCATATCTGTGC  
CAATGTTTTCATCTATCTCGAGATCGATGGGCACCTGAGCAGGAGGGTTTGCCTGGGATCATAACAGCGGGGACATG  
TAGGGGTGCTCCAGAGCCTGGGTGACACTGATCCTCTTGAAGGGTCAAAGACAAGCATCTTCTGCAACAGATCAAT  
GGCAAGAGGATGGGCGTGGCGGTACATGATACTGAGGGCATCCCCGGGTGTATGGAAGGGATTTAATGTAGTTGC  
GAGCTTTTGGTGTGTCATGAAGCAAGGTCAGTTTTCGCTCATGGTGCCAAGAACATTGACTATAAGCTTAAGCTGA  
TTAAGGCACTCGGTTCTCGAAAGATCGGCTTGGCGCAAGTAGCTCAGCAAAGATGCAGCCAACAGACCAGACATC  
TATGGAGGTGCCATAGTTGTGCGAGCAGAGCAGCAGCTCGGGAGCTCTGTACAGCGGGTGACAACGTATTTCAGTCA  
TAACTGACCTTTAGTGTATTGTTGCGAGCCAGACCAAAGTACAGATCTTCAGGTCACAGTTTCGATTGACCAGA  
AGGTTCCAGGCTTCAGTCTCTATGGAGTATCCCGCATGAAGGTACTTCAGTCTCGAGCAGCTGAAAAGGAA  
ATACTGGCAGTGGTCAATGGACAGCGGCTGAGACGACTTACTATCTGATGTCAGATCCCGTGTCCATGAGCTCGGAGA  
CCAAGTAGACATCCTTGAAGCTCCTCCTATGAATCGGCATCATTTATATCCTTCAAAGCAATGACATTTCTCATGACGC  
AGGTGCCCTGAGGAGCTTCAGCTCCCGCAGCGTCTCAACGCATCCACGCGGTTGTCAAAGACATTTGTTTATCTTCTT  
GATGGCGACCTTCTCGTTGGTCTCCTGGTTGATGGATGAGCAAACATATCCCGTAAGCACCTCTGCCAATGGGCTTGA  
TCGGCACGTACTTGGTTCGATCTCGAACATGGTCTGCCACATGGTGTAGTAGTGCTTCCCGTGGTTTCCCATGCCG  
TTCGGGGATCCACCATCATCGC**CAT**TTTTCTCAGGACCGCGGCGCAGATCTGGAGAAGCAGAGCACGTCGGGCTCG  
TCCGGGAGCGGGCGAGGAGGAAGGGATGGGAGCGCACGGGAGACGAAGGCGGAGGCCAAAGGCAGAGAGCGAC  
CGAGCAGGAGGGCGCTCTGTCTATTTTTTATTTCCGGGAAGGAAGGAAGGAAGGAACGAACGTACGCACGCACGTAG  
CTCCACTGGACTTGTGGAGTGGTGCAGGAGATGGCGATGGATGGGTGCCGCTCAGGTACAGCGAAGGGGCGGGG  
AGCTAGC

**>TsMPK11 : contig120398**

GCGGCGCGTGCCTTTCTTTCTTTCTTGGCTAGCTCCTCGATCAAGGTGTTTCGCGCGCAGGCGTGCGGTTC**ATG**CGC  
ATGGAGGGTGGAGGCGCGGGGAGGAGGAGGAGGTCACGGCGCGGCCATGGCCTCGGCGCGAGGGCGCAGAT  
CAAGGGCACGCTCACCCACGGCGCAGGTACGTGCAGTACAACGCTTACGGCAACCTCTTTGAGGCTCTGTAAAGT  
ACGTCACCCACCATCCGACTGTGCGCCGCGCGCCTGCGGCATCATCTGTCTGTGTAATGCACAGACTCGTGAG  
GAGGTGCTATCAAGAAGATTGGTAATGCGTTTGCACACAGATCGATGCCAAACGCACTTTGCGGAGAAGTAAAGCT  
GCTTCGCCACATGAATCATGAGAATGTGATTTCAATAAAGGACATCATACGCCCAAGGCGGGGAGAACTTCAACG

ATGTTTACATCGTCTATGAACTGATGGACTGATCTTACCACCTTCTAAGATCAAACCAGCCACTCACGGATGAT  
CACTGTCAGTATTTTCTCTACCAAGTGCTCCGAGGATTGAAGTATGTGCATTAGCAAAGGCTTGCACCGGGACCT  
CAGGCCGAGCAACCTGTGCTCAATGCCAAGTGTGAACTCAAGATTGGAGATTTTGGCTTGGCTAGGACCACCCTG  
AGACTGACTTCATGATGGAGTATGTTGTTACTCGGTGGTACAGGGCGCCTGAGCTCCTGCTCAACTGCTCGGAGTAC  
ACTGCAGCAATGATATATGGTCAGTGGGTGTCATCCTCGGTGAGATTGCTATGAGGGAGCCACTGTTCCCTGGAAA  
AGATTATGTTTATCAGCTGAGGCTAATTACTGAGCTGATAGGCTCACCAGATGACACGAGCCTTGGGTTTCTTCGAA  
GTGATAATGCCCGCAGATACGTGAGGTCTCTCCTCAATACCCGAAACAGCATTTTGGTTTACCGGTTCCCCAGTATG  
TCCACCGGCGCGGTGGATTTGCTTGGAGGATGCTCGTGTGATCCGAGCAAGAGGATTACTGTTGATGAGGCTCT  
ATGCCATCCGTACTTAGCATCCCTCATGAGATAAACGATGACCCCTGTCTGCCAGCGCCTTTCAGCTTCGACTTTG  
AGCAGCCATCATTTACTGAGGAAGATATCAAAGAACTTATTTGGAGGGAGGCTCTCAAGTTCAACCCGAAACCAATT  
CAC**TGA**AAAGTTGCCAATCTTTATCTTTACCTAATAATAAAGGACTGAGGCTTTTCATAGTTCTTCATACGTCGTCG  
TTTTTATCCGTTGATTTATGTAAACCTCAAATAGTTGGCGGTGAGATTAAAAGTATGATACACACCTAAGGAA  
AAAAACGCTCGTC

**>TsMPK11 : contig88156**

GCGCGCGTGGCTTTCTTTCTTTCTTGGCTAGCTCCTCGATCAAGGTGTTGCGCGCAGGCGTGGGGTGG**ATG**CGC  
ATGGAGGGTGGAGGCGCGGGGCAGGAGGAGGAGGAGTACGCGCGCGGCCATGCCTCGGCGGCGAGGCGCAGAT  
CAAGGGCAGGCTCACCACGCGCGGAGGTACGTGCAGTACAACGTCTACGGCAACCTCTTTGAGGTCTCTGCTAAGT  
ACGTCCCACCCATCCGACCTGTCCGCGCGGCGCCTGCGGCATCATCTGTGCTGTAAATGCACAGACTCGTGAG  
GAGTCCGCTATCAAGAAGATTGGTAATGCCTTTGACAACAGATCGATGCCAAACGCACTTTGCGAGAAAGTAAAGCT  
GCTTCGCCACATGAATCATGAGAAATGTGATTTCAATAAAGGACATCATACGCCCCCAAGGCGGGAGAACTTCAACG  
ATGTTTACATCGTCTATGAACTGATGGACTGATCTTACCACCTTCTAAGATCAAACCAGCCACTCACGGATGAT  
CACTGTCAGTATTTTCTCTACCAAGTGCTCCGAGGATTGAAGTATGTGCATTAGCAAAGGCTTGCACCGGGACCT  
CAGGCCGAGCAACCTGCTGCTCAATGCCAAGTGTGAACTCAAGATTGGAGATTTTGGCTTGGCTAGGACCACCCTG  
AGACTGACTTCATGATGGAGTATGTTGTTACTCGGTGGTACAGGGCGCCTGAGCTCCTGCTCAACTGCTCGGAGTAC  
ACTGCAGCAATTGATATATGGTCAGTGGGTGTCATCCTCGGTGAGATTGCTATGAGGGAGCCACTGTTCCCTGGAAA  
AGATTATGTTTATCAGCTGAGGCTAATTACTGAGCTGATAGGCTCACCAGATGACACGAGCCTTGGGTTTCTTCGAA  
GTGATAATGCCCGCAGATACGTGAGGTCTCTCCTCAATACCCGAAACAGCATTTTGGTTTACCGGTTCCCCAGTATG  
TCCACTGGCGCCATGGATTTGCTTGGAGGATGCTCGTATTTGATCCGAGCAAGAGGATTACTGTTGATGAGGCTCT  
ATGCCATCCTTATTTAGCATCCCTTCATGAGATAAATGATGAACCTGTCTGCCAGCGCCTTTCAGCTTCGACTTCG  
AGCAGCCATCATTTACTGAGGAAGATATCAAAGAACTCATTGGAGGGAGGCTCTCAAGTTCAACCCGAAACCAATT  
CAC**TGA**AAAGTTCCCAATGTAGAAAAGAAGCAATTTCAAATGGCAAATCTATCAGCTCCGTGGGAAAATAATGAG  
CTGACAGCAGATGTACAGAGTAAATGAGTATCAGCTCAGCATCTTGTATACGGCTTTGTTGATGACACCATGA  
CTTCGAAAACCTGGAAATTTAGGAAACATGAACGCTGATCAATAAATTTGTTAGCCAAAAAAGTGGGGCCATTATC  
TGATATGTCAGGTTGTATCTACCCCTTTTGGTTGATGCTTAAACAAGACTGAGTTATGACTATGGTATTACAA  
GCTTCCGGCCACTCTCCGGTCTCAGTGTGTTCCACATCCAACAGATGTTACTTATTATTA

**>TsMPK14 : contig220413**

CCCCACCGCATCTCCCTCCCTCCCCCAGCTGCAATTCACCTCCGAATTCGGTTCGCCATGGCGCGGCTGCTC  
TGATCCTACCCACCTACCCCTCCCCCCCCCTCTCCTCTCCAGCTGCTCTCCCTTCCCTCTCGTTTGA**AAATG**GCAA  
TGCTGGTGGATCCTCCGAATGGCATGGGAAACCAAGGAAGCACTACTACTCAATGTGGCAAACCTTGTGAGATT  
GACACCAAGTATGTGCCTATCAAGCCCGCGGAGGAGCTTATGGAATAGTTTGTCTATCCATAAACCGTGAGACAAA  
CGAGAAAGTAGCGATAAAGAAGATACATAATGTATTCGACAACCGTGTGGATGCACTAAGGACCTTGCGGGAGCTGA  
AATCCTCCGGCATCTCCGCATGAGAATGTTATTTCTTTGAAGGATATAATGATGCCTGTACAAAGGAGGAGCTTT  
AAGGATGTGTACTTGGTTATGAGCTCATGATACTGACATGATGATAAATCAAAATCGCCTCAGGGGCTTTCCAA  
TGACCACTGCCAATATTTCTTTTTCAGTTGCTTCGAGGACTGAAATACCTCCATTTCAGCAGAGATACTCCACAGAG  
ACCTAAAACCTGGGAACCTACTGGTGAATGCAAACCTGTGATCTGAAGATATGTGATTTTGGTCTTGCACGTACAAAC  
AGTAGTAAAGGCCAGTTATGACTGAATACGTCGTACCCGCTGGTATAGGGCTCCTGAGTTGCTGCTTTGCTGTGA  
CAACTACGGCACTTCCATCGATGTTGGTCTGTTGGCTGCATCTTTGCTGAGCTACTTGGCCGCAAGCCTATTTTTTC  
CTGGGACAGAGTGCCTCAATCAGCTAAAACCTGATAGTCAATGTTCTTGGACCATGAGCGAGTCTGACCTGGAGTTC  
ATCGACAACCCAAAAGCTCGCAGGTATATCAAGACCCTCCCTACACTCCCGGTGTTCTCTCGCAAGTATGTACCC  
ACATGCACACCTCTGGCCATCGATCTATTACAGAAGATGCTCATCTTCGACCCTACCAAAAAGGATCAGTGTTACCC  
AGGCCCTTGAGCACCCTTACATGTCTCCTGTATGACCAAGCGCAAACCTCCCGCGCAAGTGGCCATCGATCTC  
GACATAGATGAGAACATCAGCTCAGAGATGATCAGGAAATGATGTGGCAGGAGATGCTTCACTACCACCTGAAGC  
CGCCACTGCAGTAAACATG**TGA**CGGCGTCTTTCAGTGCCTCCGGGAAAGAACTCGGCAGGCTCACCTCTTTTCTC  
GAAAAGACTACTGCGATTATCGCACCTATTAAGTAACCACGACGTGCAGTGTGGAGATTATCTCCGTGTAATATG  
CAGTGCAGATAAGAACCAGATATGGATAGTTCTTGTATGGACCACTATTTGGTGTATGTATACTGTTGTTGTTGT

ATGAGCTCATGAAAGAACTGTTGAAGCGGATTACAGTAAAGTTGTTGATTTGTGATGGCCCTCCTGTGTTTGTGTTGTC  
AGTTGTTGGTATTTGAAGCAGACCTGCTGTTATTCCGCTTGTGTGTTTTATTTAGTACTATTAATCGG

**>TsMPK16 : contig209684**

CTACTAACTTACTGCATATCACATTTACAAATTCGCGACAAAAAACCCTGGGGTTTCAATAGCGAGCAGGGTCCAAATA  
ATGTGTTATCAGAAACAGTGTTCATAGTTCAATACTACAGCTGGATGACAGACTACCAAGCAACAAGAACATACTT  
TAAAGTCAATTTAACTCCGTGTTACAACATTAGATGTACAGTGGGCTCTCTGAACCTCCCTCAGGGCCACCAGCTTG  
GAGAAACGAATTTGCGGAACACCATCAGTCAAGTCAAGTCCCTTTGTCGCGAATGCCACTCAAGCTTCCAGTTT  
TTGGTTTACTTGTGAACAGTTGAACAGTGGATCTACCAATTCGAGTAAACCAGACCAGAGTTGAGCTTAACAGGAG  
ACTAGCCTGCCACAACGACCTTGCATACAGATCTATCGTCTCCGGGAGATGTAACCGTGACAGATAATATAACTCTG  
TACAGAATGGCATGTTTGAAGGTGCTCCTTGGAGTGAATAACCTTCTGATCCAGTGACAAGGATTTTCTGGCAT  
TGCCACAGCAGTCTACAGTGCCTGTTGCGCCATCCACAGTTGCAGGTAGTTTTATTCCAGTATATGGCTTTGGTG  
GCCAGCTTGGCTCACTGCGATCCTTTCAGCTTCCACTGTTTTCGCTCTTGCAGGTGTTATTTCTTCTAGGGTATGAG  
CTGCCCGAAGGAACACCGTTTGGAAACAATTCCTTGGCTTGTGATGACCCTTCGCTGTTTCATATTTGCTCGGTACCAGA  
TGTGAACAGTTTACCATAACGAAGTGCAGAACCAACCACTTTACCAGGCCTTGCAGACAGCAGCTCCTTAGGAACCTCT  
GTTTGCACCAACTGAAGCAGGATCTCTGCGTGGCTTTTGTGCATTATCTCTGATTATACACCTGGAAAGATCATCCG  
TAATGTTGGCAGCACCCTGTGGTGGCTATCTGAACCTGTGGCCGATTATCCGAATAGATAAACACTCGGCCTTGGT  
AATGAATTATGTTGCCCTCTCAGGCGGTGCTGCTGTTGATCCCTTTCGATAATGCTCTTCAAGGAATGTGAATTGCTT  
TTTGAATGATCTACTGCATTTGGGTACATGAAATTAGTTGGTCCGCCCCCTCAAGGAATTCCTCAGCATGTTTG  
GATGATATTTCCAGAATTTCTCTGTATATGAGTTCCCTTATGTCTCCTTCGTAATTCCTCGTCTCTCAAACCTCAAAC  
TCGAGCTTAGTAATGGGCTGTGCAGAAGGCTCCCTATCCACACTAGCTATGTTCTTGAATAAAGATCAGCAAGAGC  
CTCTTCAGCAGCTTGGCCGGTATTTTGGATCAAATGTAGCATTTCTCTTAAACAAATTTAATGCAAGTGGATCTGCAT  
TCGGAAACTTCTGTGTAACCGGTACAGGCTTTTTCCGCTCATACTGCTCAAGTAGCGTCTGGCCTTCTCATTTTCGA  
ATCCTAGCAATGTTTCTGGAGCAGGCGTTCCAGTAGATCTGTGATTATCAAGTTGATGCACCACATTTTTC  
AGGAAAAAGAGGTTTGGCAGTTTCCGAGTTTCCGCAATATACATCCAATCTCATATATCTATTGCTGGTGTACT  
TGGAGAAAAAGATCCACATAGCTCAGGTGCTCGGTACCACCTTGTGCGATATAATCCGTCCAAATAATGGCGGTT  
GGAGTATCATTATAGTACCCCTTGCAGACCGAAGTACATATTTTGGCTTACATCAGCATTAGCCAAAGATAT  
CTTTGGTTTGGATCTCGATGAATAACATTTGCTGTATGTATGTTTCAATCCTCGGAGCAACTGATACAAGAAAA  
ACTGATAATGTTCTGGAGTCAAGTCAATTCGCTTTATAACTTGGTGCAAACTCAGATCCATGAGTTCGAAAAACA  
ACGTATATATCTTGAATCTCTCCTCGACGGAGGAGTAGAATATGTTTATTTCCACAATATCAGGGTGTCTTAG  
GAGCCTAAGCAACTTGTATCTCGCGGAGTATCCGTGTCGCATCAGACACATGTTCAAAGATGTCGTTTATCTTCTTGA  
TAGCAACTTTCTCACCCTGTGAGTATCCAAAGCAGAGCAGACCACGCCATAACTCCCTTTTCTATAACCTCTTCT  
ATCTTGTATCTGTTTCCCTCGCCATACTCGGTAATAAAGTCCATTTGAGATGTTTCGCTCACGCGGCACACGACGAC  
GAGGGGGAGGAGTCCAGCTGCGCTGCGCTGCGATCCAAGGCGAAGCTCGAGGACAGAGGGGGGGGGGGTGGTAGC  
TGGGAG

**>TsMPK16 : contig244429**

AAACATACGTCGCAACTCCATTTTTACTCGGGCTACTTGGATTACTGCATACATCATTATAAAATTCGCGACTCAATAG  
CGAGCAGGGTCCAAATAATGTGTTATCAGAAATAGCCGTGTTTAAATAGTTCAATACTACAGCTTGATGACAGACTAC  
AAGCAACAAGAAACATTAAAGTCAATTAATTAACCTCCGTGTTACAACATTAGATAGTGTACAGTGGGCTCTCTGAACC  
TCCCTCAAGGCCACCAGCTTGGAGAAACAAATCGAGGAACACCATCAGTCAAGTCAAGTCCCTTTGTCGTGAA  
TGCCGCTCAAAGTTTCCAGTTTTTTTGTATACTTGTGAACAGTTGAACGGATCTACCCAATTGCAGGTAACCAG  
ACCAGAGTTGAGCTTAAACAGGAGACTAGCCTGTGCGCAAAGGCTCTCATAAGTTCTATCGTCTCCGGGAGATGTAA  
GCTTGACAGATAATATAACTCTGTACAGAATGGCATGTTTGAAGGTGTCTTGGAAATGAGGTGACAAGGATTTTC  
TGGCATTGTACAGCAGTCACTAGTCCAGTGCCTTTCAGCTTCCACTGTTTCACTCTTGCAGGTGTTATTTCTTCTAGGG  
TATGAGCTGCCTGAAGGAACGCCGTTTGGAAACAATTCCTTGGCTTGTGATGACCCCTTCGCTGTTTCATATGCTCAGT  
ACCAGATGTTGAACAGTTACCATAACGAAGTGCAGAACCAACCACTTTACCAGGCCTTGCAGACAGCAGCACCCTTAG  
GAATCTGTTTGCACCAACTGAAGCAGGATCTTGCCTGGCTTTTGTGCATTATCTGATTATACACCTGGAAAGA  
TCATCCGTAATGTTGGCAGCACCCTGTGGTGGCTATCTGAACCTGTGGCCGATTATCCGAATAGATAAACCTCGG  
CCTTGGTAATGAATTATGTTGCCCTCTCAGGCGGCGTCTGTTGATCCCTTTCGATAATGCTCTTCAAGGAATGTGA  
ATTGCTTTTTGAAATGATCTACTGCATTTGGGTACATGAAATTAGTTGGCTCTGCCCCCTCAAGGAATTCCTCAGC  
ATGTTTGGATGATATTTCCAGAATTTCTCTGTATATGAGTTCCCTTATGTCGTCTTCGTAATTTCTCGTCTCTCAA  
CTCGAATCAAGTTTCCGAAATTTGGATGCCCTTGAAGGCTCACGCTCCACATTTGGCAAGACTTGCAAAAATATGGGTCTG  
CCAAAGCCTCTTTCAGCTGAAGGCCGCTTTTAGGATCAAATGCAAGTAAACGCCCTAGTAAGCGAACCGCCAATGGA  
TCAGCATTAGGAAATTTCTGAGTCAAGGGTACAGGATGCTTTTTTCGCATGCAACTTAAGTAGCGCTGGCCTTCTC  
ATTTCAATCCTAGCAATTTGTTTCTGGAGCAGGTGTTCCAGGAGATCTGTGATTATATCAAGTTGGTGCACCACAT

TTTTCCAGGAAAAAGAGGTTTGGCAGTTAGAAAGTTCCGCAAATATACATCCAATACTCCATATATCTATTGCTGGT  
GTGTACTTGGAGAAAAAGATCCACATAGTTCAGGTGCTCGGTACCACCTTGTTCGATATAATCCGTCCAAAAT  
GGCGTTGGAGTATCACTTATAGCTACCTTGAAGACCGAAGTCACATATTTTGAGCTTACAATCAGCATTAGCCA  
AGATATTCTTTGGTTTGGATCTCGATGAAATACATTTGCTGTATGTATGTTTCAATCCTCGGAGCAACTGATAC  
AAGAAAACTGATAATGTTCCGGAGTCAAGTCATCATTTGGCCTTTATAACTTGGTGCAAATCAGACTCCATGAGTTC  
GAAAAACAACGTATATATCCTTGAACCTCTCCTCGACGGAGGAAGTAGAATATGTTTTATTTCACGATATCGGGAT  
GTCTTAGGAGCTAAGCAACTTGATCTCGCGGAGTATCCGCGTCGCATCAGACACATGTTCAAAGATGTCGTTTTATC  
TTCTTGATAGCAACTTCTCACCCGTGTGAGTATCCAAAGCAGAGCAGACCACGCCATAACTCCCTTTTCTATAAC  
CTCTTCAATCTGTATCTGTTCCCTCGCATACTCGGTAAAAAGTCCATTTGAGATGTTTCGCTCACGCGCGCGCA  
CGACGACGGGCGGGGAGAGCCCAGCTCGCTGCGATCCAAGGCAGAGCTCGAGGACAGAGAAGAGGGGGCGGT  
GGTAGCTGGGAAGTCAGGAGAGAGCCCCACACAGTGGCCTCCGCTTTTCGGAATTTATACCGGAGATTTATTTCTCT  
CTTTGCTTAACTAGAT

**>TsMPK17 : contig26009**

TCACCGGCGGCAGGCAGAGAACTCACCGAGTACAAATGCCAAGTAACTGATCCAAGAGTCGAGACAAATTGGGGAG  
AATGAATGATCACAGCTCTTGAATGGAGGGGAATCCTTTGGACTTGTCTTCTGTATTTTGTAGACCGTGGAGCAA  
TTGCGTTGCCATATCGCACACGTCGGTAGGAACTGAGACCGTCTGGTCTCCCGCTCATATCAGTCTCGGAAG  
AATCACGCACCAAGAGGCGGCACAACCTCCTTGGCAGATGCCGTGCACCTCGATGCTGAAACTAGGCTACAAATGAC  
GGGAAACATCGTTCAAATGAGAAAAAATACTACTAGATGTTTCTAAATCTGTACTCAGGGTCCAGCTTAATTGCCA  
CATTTATCCAAAACGCCAAAAGAAAGAAATGAAACTCAGCACTTGTGATATAGATGCAGAGCAGCAACGCTTCTT  
GATACTATTAAGGATGTTTCGACAAGGAAACATGACAAGTGTTCATCAGATGCTTTGGTCCGTTTCGTTACAATCAT  
GTACTTAGATGCTAGAGAGCAAATGTCGGTGTACATTGCGAGCTTGAAGTGTAAAAATACATCAATCCATGCAGG  
GTACACCAACGATGCTGGGCACCTTGGCAGGAAACCGCACTCGTAAACCATCCCCAGCTTGACAGCGGGCGCAGTGC  
TCTGCTTCCCTAGGACAGCGCTCTGCTATCATCATCCGGTGTACATGACAGAAATGCGGTGCAGAGCTCGACTT  
TCGTTTGTCTCGCTCCCTGCACTAGGCGTGCATCTTGGAGACCTTCTCGGATAGTCCGTCGACGGCCCCCTCCGCTTC  
TCGGAGATTGCATCGTCATACTCTGGCTGTTTATTTCGGGTTGACAACGACACACTTGGAAAGCGTAATGCTCGCGCT  
CTTGAGGTAGTCCGCGAGCTTAAGCTGGTGGGGCTCAGACCATTCTGGCCAACGCGGGTGCATCCTGTGCCTTTT  
GAGGGCTCTCTGTACCATGGGCATCAGGCTCTGCATCATCTCCTGATCACTAATATGCTGTTTATTACCGTCCG  
TTCGACGCACCTACTCTGCTTGGTAAAGAGGCATGCTTTCTTTCGAGCGGGGAACTCGTTCTCCTTTGCTGTA  
ATGCTCCTCCAGGTGTGCAAACTGCCGTTTAAAGCGGTCAACACCCTTGGATAGAGGAAGCTAATCTGGTCACCAC  
CTTTCATGTATTCTCCAGCATCTGTGGATGGTACTCCAGAATCTCTCGATAGATCAACTCCCTAACATCATCTTTT  
GTAACCTTCCGCTCTCAAACCTCAAACCTCAAGTTTCGAAATGGATGCCTTGAAGGCTCACGCTCCACATTGGCAA  
ACTTGCAAAATATGGGTCTGCCAAAGCCTTTCAGCTGAAGGCCGGTCTTTAGGATCAAATGCAAGTAAACGCCCTA  
GTAAGCGAACCGCAAATGGATCAGCATTAGGAAATTTCTGAGTCAAGGGGACAGGATGCTTTTTTCGATGCAACTT  
AAGTATCTCTGGCCCTTTTCAATTTCTAATCCGAGATAAGGTTTCTGATGATGGAGTTCGAAGAAGATCTGTTATTAT  
ATCTAACTGGTGTACAACATTTCTCCAGGAAAAAGTGGTCCGTCAGTGAAGCTCGGCAAATATGCATCCAATAC  
TCCAAATATCAATAGCAGGAGTGTATTTTCGAGAAAAAGGAGCCACATAATTCAGGGGCTCTGTACCACCTTGTGCT  
ACATAATCCGTCCAAAATATAGCTGAAGGAGCATATTAATGATACACGCGCAAGTCCAAAGTCAAAAATTTTCAG  
TTTGCAGTCTGCGTTGGCCAGTATATTTGGGCTTCAGATCGCGATGAAATACATTAGCCCCATGGATGTACTTGA  
GAGCGCGGAGAAAGCTGGTACAGGAAAAAAGTGGTAACTGCTCCGCGTGAGGTATCATATAGCTCTGATGACCTGATGG  
AGATCCGACTCCATCAGCTCAAAAACAACGTATATATCTTGGAACTCCCTCCGAGAAGGAGGGAGCATTATGTGCTT  
GATCTTACCAGCTCTGGATGACGTAGCAGCCGAAGGAGCTTACCTCACGGAGGATGCGCGTGGCATCCGAGAGCT  
GCTCAACACATCGTTGATCTTCTAATCGCAACCCGCTCGCCGGTGCAGGATCTATTGCAGCAGCAACTACTCCA  
TAACTCCCCTTGCCAACAACTTCTGGATTTGGTACTGGCTTGCCCTCCATACTCTGTGAAGAATTTCTTCCAT  
TATGTTCTTCTTGTGGCTCTCGACGGGAGCGGCATCTTGCCTTGGGACGCGGATGGGGCGGAGGCCACGAGAT  
CCAGGTCTTCGACGGCTCGACGCTCGGAGGGTCTCGCCGGCGGAGGACTGGTTGGAGCTGGCGAGCAGGAGCCG  
GAGGGCTGCGGGCGGTGGAACAAGCGGGCGGAAGCCTCGACGATGCCGTTCCCTCCTCCCATGATCCCTCCCTAC  
CCCTGCGGCATTGGCTAGCTGCCCGCTCTCTCCAGCCACAGCCACAGCTCCCCCTACTCTTCTCCTCCCGCC  
GCCACTCACCGCACTAAGGAGACCCCGGAGCTCACTCTCTCCGCGCGGTGTCCCGCGGCTGTCCCGCGGTGTCTGCG  
CGCAGAGGACGGAGGATTTGATGCGGGAGGAAACGCGGGTCTGCTCTTATACTGCC

**>TsMPK17 : contig75139**

TTTTCGCAGCAGTAAACGCTTCTTGATATATTAAGAATTTTCGACAGCGAAAACATGACAGCGTCAAGATGTCTTGCTC  
TGTTGTTGTTTACAATCATGATAGATGATAGGTGTAGGAACATAATCCAGTGTACATTGAGTGTAAAAATACATC  
AATCCATGCAGGGCCAGCTCCTGCGTGCAGCAACGACGCTTGCAGGAAACATGCACTCCGCTAAAACCATCTCCAACT  
TGCAGTCTTTGCTATCAGCTATCAGCATCCGGTGTACCTGACAGAAATGAGAAATGCGGTGCCGACTTCCGCTGCTC  
GTTGCTGCACTAGGCATGCATCTTGGAGCTTCTCGGATAGTCCGTCACAGGCTCCTTCTGTTTCTCAGAGATGC

CGTCGTCATACTCTGGCTGTTTATTTCGGGTTGACAACGACGCACTTGGAAAGCGCTAATGCTCGCGCTCTTGAGGTAG  
GTCCGCGAGCTCAAGCTGGTGGGGCTCAGACCATTCTGGCCAACACCGGGTGCATCCTGTGACTTTTGAGGGCTCAC  
TGCACCATGGGCATCAGGCTCTGCACTCATCTCCTGATCACTAATATGCTGCTCATTATTACCGTCTGTCGATGCAC  
CTACCCTCTGCTTGGTAAAGAGGCATGCTTTCTTTGACGCGGAGAACCCTCGTTCTCCTTTGCTGTAATGCTCCCTCC  
AGGTGTGCAAACCTGCCGTTTAAAGCGGTCAACACCCTTGGATAGAGGAAGCTAATCTGGTCTCCACCTTTCATGTA  
TTCCTCCAGCATCTGTGGATGGTACTCCAAAATCTCTCGATAGATCAATTCCCTAACATCATCTTTTGTAACTTTC  
GTCTCTCAAACCTCAAACCTCGAGTTTCGAAATTTGGATGCCTTGATGGCTCAGCTCCACATTGGCAAGAGATGCAAAA  
TATGGGTCTGCTAAAGCCTCTTCAGCTGAAGGCCGGTCTTTAGGATCAATGCAAGTAAACGACCCAGTAGGCGAAC  
CGCCAATGGATCGGCATTAGGAAATTTCTGAGTCAAGGGTACAGGGTGTTTTTCGCGATGCAACTTAAGTACCCTCC  
TGGCCTTCTCATTTTCGAATCCGAGATAAGGTTTCTGATGATGGAGTTCCAAGAAGATCTGTTATTATATCTAACTGG  
TGTACAACATTTCTCCAGGAAAGAGTGGCCGTCAGTGAGAAGCTCGGCAAATATGCATCCAATACTCCAAATATC  
AATAGCAGGAGTGTATTTCGAGAAAAGGAGCCACATAATTCAGGGGCTCTGTACCACCTTGTGTCTACATAATCCG  
TCCAAAATATAGCTGAAGGAGCATCATTAAATGATACACGCGCAAGTCCAAAGTCAAAAATTTTCAGTTTGCAGTCT  
GCGTTGGCCAGTATATTCTTGGGCTTTAGATCACGATGAAATACATTAGCGCCATGGATGTAATGAGAGCACGGAG  
AAGCTGGTAAAGGAAAAACTGGTAATGCTCCGCCGTGAGGTCATCATTAGCTCTGATGACCTGATGGAGATCCGACT  
CCATGAGCTCGAAAACAACATATATATCTTGGAACTCCCTCCGAGAAGGGGGGAGCATTATGTGCTTGTATCTCCACC  
ACGCTTGATGACGTAGCAGCCGAGGAGCTTGACCTCGCGGAGGATGCGTGTGGATCCGAGACGTGCTCAAACAC  
ATCGTTGATCTTCTTAATCGCAACCCGCTCGCCGGTGCAGGATATCTATTGACGACGCAACTACTCCATAACTCCCT  
TGCCAAACAATCTCCTGGATTGGTACTGGCTTGCCTCTCCATACTCTGTGAAGAATCTTTCTCCATTATGTCTCTC  
TTGTGGCTCTCGACGGGAGCGGCATCTTCCGCTTGGGGACCGGATGGGGCGGAGGCCACAGAGATCCAGGCTCTC  
GGCGGCTCGGCGTGGAGGAGTCTCGCCGGCGGAGGACTGGTTGGAGCTGCCGAGCACGGAGCCGGAGGGCGTGC  
GGCGTGGAAACAGCGCGGAAGCGTCCGACGATGCGTTCCTCCCCCATGTATCCCTCCCTACCCTGCGGCA  
TTGGCTAGCTGCTAGCCGCTCTCCAGCCACAGCCACAGCTCCTCCTACTCCTCCTCCACCAACTCTTCTCGCT  
CCCCCTCCCGCCGCACTACTGGCTCGAGGTGGAGTGTCTCGGCCGCTATCTCCGGCGGTGTCTGCGGCGTGGAG  
CGGACGGATTGGATCGGCGGCGCAACCGCGGGTGTGCTCTTATACTGCCCGGCGGATTTGGGGCGGGGGCGGAA  
GGAATTTCTCTCTTTTTCGGCTCTGCGTTTTCTGCGGTGTGGGTGACAGATAAAGCTGTACAGCACACGCTC  
GCTCGCTCACACACGGTGTGTGTGACGAAGGCAAAACG

**>TsMPK17 : contig38651**

TTTTTTAGACCGGAGCAGTAACGCTTCTTGATATATTAAGATTAAGAATGTTTCGACACAAAACAGGACAGTGTTTAG  
ATGCATTGCTCTGTTTCGTTACAATCCGGCATAGATGACAGAGAGCAAATCGCAGTGTACGTTGTGAGCTTGAATGT  
AAAAATACATCAAAGACAGACAGGGCCAGCTCCTGGGTACAGCAACGATGCTTGGCAGGAACATGCACCTCGGCTAAA  
CCAATCTCCAACCTGACGCGCTCTGCTTCTTAGGAGTGCATGCTATGCTATCAGCATCCGGCGTACCTGACAGAA  
ATGCGGCGCCGAGCTTTCATCGGCTCCCTGCACTAGGCGTGCATCTTGGAGACCTTCTCGGATAGTCCATC  
GACGCCCCCTTCGTTTCTCAGAGATTGCATCGTCACTACTCTGGCTGTTTATTTCGGGTTGACAACGACACACTTGG  
AAGCACTAATGCTCGGCTCTTGGAGTAGTCCGCGAGCTTAAAGCTAGTTGGGCTCAGACCATTCCGGCCAAACTG  
GGTGCATCCTGTGACTTTTGGAGGCTCAGTGCGCCATGGGCATCAGGCTCTGCATCATCTCCTGATCACTAATATG  
CTGTTTATTATTACCGTCTGTCGACGCACTACTCTCTGCCTTGGTAAAGAGGCATGCTTTCTTTCGAGCGGGGAA  
CTCGTCTCCTTTGCTGTAATGCTCCTCAGGTGTGCAAACTGCCGTTTAAAGCGGTCAACACCATTGGATAGAGG  
AAGCTAATCTGGTCTCCACCTTTCATGTATTCTCCAGCATCTGTGGATGGTACTCCAAAATCTCTCGATAAATCAA  
TTCCTAACATCATCTTTTGTACCTTTCGCTCTCAAACCTCAAACCTCAAGTTTCGAAATTTGGATGCTTGAAGGCT  
CGCGCTCCACATTGGCAAGAGATGCAAAAATATGGGTCTGCTAAAGCCTCTTCAGCTGAAGGACGGCTTTAGGATCA  
AATGCAAGTAAACGACCAGTAGGCGAACCCCAATGGATCAGCATTAGGAAATTTCTGAGTCAAGGGTACAGGGTG  
TTTTTTTCGATGCAACTTAAGTAACTCCTGGCCTTCTCATTTCGAATCCGAGATAAGGTTTCTGATGATGGAGTTC  
CAAGAAGATCTGTTATTATATCTAATCTAAGTGTGACGACATCTTCCAGGAAAGAGTGGCCGTCAGTGAGAAGCTCG  
GCAAAATGCACTCAATACTCCAAATATCAATAGCAGGAGTGTATTTGAGAAAAGGAGCCACATAATTCAGGGG  
CCTGTACCACCTTGTGCTACATAATCCGTCCAAAATATAGCTGAAGGAGCATCATTAATGATACACGCGCAAGT  
CAAAGTCACAAAATTTTCAGTTTGCAGTCTGCGTGGCCAGTATATTCTTGGGCTTCAGATCGGATGAAATACATTA  
GCCCATGGATGTACTTGAGAGCGCGGAGAAGCTGGTAAAGGAAAAACTGGTAATGCTCAGCTGTGAGGTATCATATT  
CGCTCTGATGACCTGATGGAGATCTGACTCCATCAGCTCGAAAACAACATATATATCTTGGAACTCCCTCCGAGAAG  
GGGGGAGCATTATGTGCTTGTATCTTACCACGTCTGGATGACGTAGCAGCCGAAGGAGCTTGACCTCGCGGAGGATG  
CGTGTGGCATCCGAGACGTGCTCAAACACGTCATTGATCTTCTTAATCGCAACCCGCTCGCCGGTGGGGTATCTAT  
TGCAGCAGCACTACTCCATAACTCCCTTGGCAACAACCTCTTGGATTTGGTACTGGCTCGCTCTCCATACTCTG  
TGAAGAATCTTTCTCATTATGTTCTTCTTGTGGCTCTCGACGGGAGCGGCATCTTGCCTTGGGGACGCGGATG  
GGGCGGAGGCCACAGAGATCCAGGTCTCGACGGCTCGACGTCGGAGGAGTCTCGCCGGCGGAAGACTGGTTGGA  
GCTGCCGAGCACGGAGCCGGAGGGCGTGGCGGGTGGAAACAAGCGGCGGAAGCCGTCGACGATGCCGTTCCCTCCTC  
CATGTATCCCTCCCTACCCTGCGGCATTGGCTAGCTGCCCGCTCTCCAGCCACAGCCACAGCTCCTCCTC

TACTACTACTACTCTTCTCGCCTCCCCCTTCCGCCGCCACTACTGGCTCGAGATGGAGTGCTCGGCCGTATC  
TCCGGCGGTGTCGTGCGCGGTGAGGATGGA

**>TsMPK20-1 : contig53750**

GGGCTGCCCTGCGCTGTAAACCTTGCGCATCCCCACCAAGCTTGATCCGCCACTTCGTTTCTCGCTGTTTCGTTA  
AGCCACCAGCCGCACTCCAGGAAGGCATGTCGGATGCGCCTGACTGGCCACTAATACATCTGCGACATACTGTAGGG  
AACACGCCGACCTTCTGTGAGCACTTGCCGCCACTCCTGTTGTAGTTGGAGCTATGCCATTAAGGGATCTCGAGT  
ATAGGTTTGATTCGGCTGATAGCCTA**TC**GAGAAGAACCCTTTTCGGCCCTGCTGACTGATGGAAGGGAGGTGCTCTC  
ATGTCCAACATCAGGCACAGTTGAACCTGTTTGCACAAGCATAGGCCTGCTGGTGCAGCGTATACATTTCCGCCCTGCC  
ATGGCTCGGAGCAAGCTGACTTTGCCGGTGTCTGATAATAACCGTATATTTGCCGGATTTGTTGTTGGGGAGGATAA  
CCGGAGCTCATTGCTGCCACTCTTCTTGGGTCATATGTATCCTTCATGCCACCATTTTCGTAAGGCAGAAGTGGACC  
AACACCCTTCTGGTCTTGTCTTGGCCTCTTTGTGGAGCCTGTGAGGTTCTCTGGGCATGCGCAGAAATATTTT  
CTGAATCTCGATGATTTTGTAAAGACTCGTCAGGCGAAGGCTTATCCCTTGATGGCCAATACGGGGTGTTCCTTG  
CCATGAATTGGAGCTGAGTGAACAATAGTAGACCTAGGAAGAGAGGTGTGCTTTCTATCCATTGGAACCTACAGGACC  
ATTTCTCACTGTTTTCTCAAGATGGGCAAACTGCTTCTAAATGATCAACAGCACTGGGTATAGAAAGGTTGTCC  
TTTCAGTGCCATTGGTGTAGTCTTTGAGCAATTGTGGATGGTATTCCAATATCTCACGAAATATAAGCTCCCTTATG  
TCTTCTTTTGTCACTCTTCTACGCTCAAACCTCAAACCTCCATTTTGTGATTTGGTGGCAGGATGGTTCTCTCTCAAC  
CTTGGCAAGCCCTTAAAGTACGGATGAGACAATGCCTCTTACAGCAGTTGGGCGGTCTTTGGATCGAACGCTAAAA  
GCCTTTGCACAGGCTTAAGGCCAAAGGATCTGCATTGAGAAATTTATGCGAAATGAAATTGGCTCTTTCTTTCTC  
ATGCTGCTCAGATACCTCCTTGTCTTCTCATTTCCGACCCGAGAGATTGTATCCATAGATGGTGGCCAGAAAGGTC  
AGTCATCAAATCTAACTGATGTACAACATTTTACCAGGAAACAAAGGTTTCTGTCAAGACCTCAGCAAAGATGC  
ATCCGATGCTCCAGACATCAATGGCGGGTGTATACCTTGAAGAAAGAACACAGAGCTCTGGAGCTTATACCAT  
CTTGTGCAACGTAATCCGTCAAAAGATTGTTGTGGGGGTATCGTTGAATGCAACTCGTGCCAATCCAAAATCACA  
AATCTTCAGTTTGCAGTTGGAATTTGCCAATATATCTTTGGCTTTAGGTCCCGGTGATAAACATTAGCAGTGTGAA  
TGTACTTCCAGAGCCCGGAGTAATTTGATAAAGAAAGAACTGGTAAATGCTCCTTTGTCAAGTCATCTAGCCCTTATA  
ACCTGGTGGAGATCAGACTCCATGAGCTCAAAAACGACATAAATATCTTTGAAGTCTCTTCTTGTGATGGAGGTAACAT  
GATATGCTTGTATCTCAACAATGTGAGGATGCTTAAAGAGCCTCAGAAGCTTGATCTCACGGAGAATCCGTGCGAGCAT  
CAGATATGTGCTCAAAGATATCATGTATCTTTTTATTGCCACTTTCTCTCCCGTGTGGACGTCTATTGCGGAGCAC  
ACGACACCATAGTGCCTTTCCAACGATTTCTGAATTTGTATCGACTTGCCTGCGCTACTCCGTAAAAAATCTC  
TGCCCTGCGGAACTCTTTTGGCTGATCTGCT**CA**CTCGCCGCTCACCAGGATCTCGCCCGAATCTCCTCGGC  
TCCCCCGTACCCTAAGGGCGGCAACAACAACAGCACCAAGCCCGCCCTCCGAATCGACACGGTCAGACACACGGC  
ATTTGCTGGCCCGGGCCGAAAAGCGCACACGCCGAGGGCGCCGGCGGGCGGATCGTGAGACGAGACGAGGCGACG  
AAGGGAGGGCGGAACTGGGGGGAGACCCTAACCTTAGCGACGGGGCGCTGGGGCAGGGCTAGGGCTCCCGCGCGC  
TCTCTCTCTGTTCTCTCTCTCTCTCTCTGGTCATGTACCAGCTCCGGGAGGGGAATAA

**>TsMPk20-1 : contig64364**

TACATGGGGGCCCGCAAACGATTGTGGCCGTTGCTTTTCTTGTGCGGTGGGCAAAGCTGTTGGCTTTTCTTGTG  
GGGTTCTCTTGTACATGGGGGTGCACGACCCTTGACTCACAAGTGGCGCGTGTACCATTTCATTTTCGCAACCAA  
CACTCAAGATCTTGTCTCTCAAGAAATTTCTTTGATCTACCTGCACAGCAGTTGAATTTGGCATCAATTTCTTAA  
TACTGGTTGTAGCTTCCAATGATTACTTTTACATGTCGTCATTAAAAAGTATCTGGAGAGTTCGCGAGAGCA  
GAGTTTTTTACGGAGTACGGCGACGCAAGTGCATACAAGATTCAAGAAATCGTTGGAAGGGCAGCTATGGTGTGCT  
GTGCTCCGCAATAGACGTCCACACCGGAGAGAAAGTGGCGATAAAAAAGATACATGATATCTTTGAGCACATATCTG  
ATGCTGCACGGATTCTCCGTGAGATCAAGCTTCTGAGGCTCTTAAGACATCTGACATTGTTGAGATCAAGCATATT  
**ATG**TTACCTCCATCGAGAAGAGACTTCAAAGATATTTATGTCGTTTTTGGCTCATGGAGTCTGATCTCCACCAGGT  
TATAAAGGCTAATGATGAGTTGACAAAGGAGCATTACCAGTTCTTTCTTTACCAATTAATCCGGGCTCTGAAGTACA  
TTCACACTGCTAATGTTTATCACCGGACCTAAAGCCAAAGAATATATTGGCAAATTCACACTGCAAATGAAGATT  
TGTGATTTTGGATTGGCAGGATTGCATTCAACGATACCCCAACAACATCTTTTGGACGGATTATGTTGCGACAAG  
ATGGTATAGAGCTCCAGAGCTCTGTGGTTCTTCTTTTCAAAGTATACACCCGCCATTGATGCTGGAGCATCGGAT  
GCATCTTTGCTGAGGCTTGACAGGAAAACCTTTGTTTCTGGTAAAAATGTTGTACATCAGTTAGATTGATGACT  
GATCTTCTGGGCACACCATCTATGGATACAATCTCTCGGGTCCGGAATGAGAAAGCAAGGAGGTATCTGAGCAGCAT  
GAGAAAGAAAGAGCTGATTTTCAATTTTCGCATAAATTTCCAATGCAGATCCTTTGGCCTTAGACCTGTTGCAAAGGC  
TTTTAGCGTTTGTATCCAAAGGACCGCCCACTGCTGAAGAGGCATTGTCTCATCCGTACTTTAAAGGGCTTGCCAAG  
GTTGAGAGAGAACCATCTGCAACCAATCAAAAAATGGAGTTTGTGTTGAGCGTAGAAGAGTGACAAAAGAAGA  
CATAAGGGAGCTTATATTTCTGTGAGATATTGGAATACCATCCCAATGCTCAAAGACTACACCAATGGCACTGAAA  
GGACAACCTTTCTATACCCAAGTCTGTTGATCAATTTAGGAAGCAGTTTGTCTCATCTTGAAGAAAATAGTGAGAA  
GGCCCTGTAGTTCCAATGGATAGAAAGCACACCTCTCTTCTTAGTCTACTATTGTTCACTCAGCTCCAATTCATGG  
CAAGGAACAACCCCGTATTGGCCCATCAAGGGATAAGCCTTCCGCTGACGAGTCTTATAAAAATCATCGAGATTGAG



GCGCTGTGCCTTTGGTGTATCCACCACAGGCATAGCCCCCATGGTTTGTGGTATCCAGCGCCAGCACCAGGAGCT  
GCTTGATGCTGATATTGCCCATACAATTGTGGGATCTGCTGCTGAGGAGGGCATCCTGAGCTCATCGCCGGCTGCT  
TGCTGCGTCAATAAGGGTATCTGCCGACTCCAGCTTCACTGGGTAATGCTGAGCCAGCAGCTCTCCGTGAAACCCTG  
CTTGTGCCGCTGTGAAGCCTGAGAAGCACCGTGACCATTCCAGCATACTCCCTGTCTCCGAGGAAGTTTGTCTG  
CAAGGCTTGCCAAAGACGGCCGAGTGTCTTCCGCGGAATTGGAGTCGAGTGAACAATAGTGGACCTAGGAAGAGA  
TGCATGTTTTCTATCTGCTGGGACTACAGGGCCGCTACCATCGCTTCTTTCGAGATGAGAGAAGTCTTCTTAAAT  
GATCGACAGCACTTGGGTAGAGAAAGGTTGCTCTCTGTGCCATCAGTGTAGCTCTCAGCAATTGCGGATGATAT  
TCCAAATATCTCTGGAATATCAGCTCCCTTATATCATCTTTCGACACTCTGCTGTCTCAAAGTCAAATCCAATTTT  
CTGATTGGCTGACAGGATGGTCTCTCTCTGCTTGGAAAGGCTCTAAAGTATGGATCAGTCAATGCCTCTTCCGC  
AGTTGGACGGTCTTTTGGATCAAAGGCTAATAGCTTCTCAAGAGTTTTACTCCCAAAGGATCTGCATTAGGAACT  
TCTGAGAAAAATGGGACCGGGTCTTTCTTCTCATACTGCTCAAGTACCTTCTTGTCTTCTCGTTTTCGGACCCGAGAA  
ATTGTATCCATTGAAGTGTGCTTGAAGATCAGTCAATCAAGTCTAAGTATGGACAACATTTTACCAGGAAACAA  
AGGCTTCTCTGTCAGCACCTCAGCAAAAAATACACCAATGCTCCAGATGTCAATGGCAGGTGTATACTTTGTGAAGA  
AGGATCCGCAGAGCTCTGGAGCTCTATACCATCTTGTGCGACATAATCCGTCCAGAAGACAGTGTGTGGGGTATCG  
TTGAATGCAACTCGTGTAGTCCAAAATCACATATCTTCAATTGTCAGTTAGAATTGCCAAAATATTCTTGGGCTT  
CAGGTCACGATGGTAAACTAGCAGTATGAATGTATTTGAGGGCTCGGAGTAGCTGGTAGAGAAAGAACTGGTAAAT  
GCTCTTTTGTCAAGTCACTGCTTGGCTTAAATAACTTGGTGGAGATCAGACTCCATGAGCTCAAAAACACATAAATG  
TCTTTGAAGTCTTTTTCGGAGGGAGGCAACATAATGTGCTTGTATCTCGACGACGTCGGGATGCCGCAAGAGCCTCAG  
AAGCTTGATCTCACGGAGAATCCGCGCGGCTCGGAGGTATGCTCGAAAATATTGTGTATCTTCTGATGGCCACTT  
TCTGCTGGTCTGCAGATCAAAGGCAGACACAAACCCATAGCTCCCTTGGCAACCTCTGGATCTTGTACCGG  
TTGGCGTCCGCTACTCCGAGAAGTCCACCTCCGCCGAACTCTTGGTCCGCTGCGCTGCTGCATGGCCGTTGCCG  
GGCGGGCCGATCTGCGTCCAAGGCCGCTCCGGAAGCCGACCCCTGCCCTCCGCGGCGCCGGACCCCGCCTCC  
CGGTCCGTCGGCCGAGCCGCCGCCGAACTCACACGTATGCCGCGGGCCGATGCCGGGCCAGGGTGCCTGGACGGAC  
TCTTCTGGCCGATCTGGCGCGCCCGGAGAGAAGGGAGGGGAGCGGGATG

Comment [FN1]: Deletion? Requires an extra T in order to translate into full length MAPK sequence.

>TsMPK20-2 : contig113411

AAATGAATCATATGATGATGATCAATGGACCATCATCCCTTAAATCAATTAATCAGTCTGTTGGATAGTAAGCAGTA  
GCACAGTACAGACTTCAATTTCTGTGTTGAGTTGACCTGTCTCCAGCCGGCCGCTAACCCGGCTAATTAATTTTCAATTT  
CCACCTAAATAAACAGTCTGCTTGGCCACACCCGTCACCGGTCACCCCTCCGCTCTTTTGTGTGTAGCCTAGAGACG  
ACATGGAACAGGATTTTCCAGCTACTATCTGTATGCTTCCGCTTCTGTCGTCGTCAGACGATCCTCATCCGC  
CAACTTATTTTCAAGCAATGCCTCCCTCCGGTTGCTACGGTCCGCGCAAGTGTCTAGAGACGCGCCGCTGCCATC  
TTCTTAGACGCTAGTAAGTCTGTCGGCATGCCAAACGGGACGGCGCAACCTTCTGTGGGCGCTGGCAGTGCCAGCC  
GATGCTGCGGCGGGCGGACGATGCCGTTGAGCGACCCGCTGTATATGTCGGTGGTCTCCACCCGACGCTGTCTCCAG  
CGACCCGTTCTTCTGCCCGCCGGAAGGTGGCGGTAGGGGGTGTCTCATGGCTGGAGCAGCAGCAGCATTCG  
GCGCTGTGCTTTTGGTATACCCACACAGGCATAGCCCCCATGGCTTGTGGTATCCAGCACCCAGCAGGTGCTTGA  
TGCTGATATTGCCCATACATTTGTGGGATCTGCTGCTGAGGAGGGCATCCTGGGCTAATCGTCCGGCTGCTTGGCCG  
GTCATAAGGTAAAGCTGAACCAGCAGCTCTCCGTGAAACACTGCTTGTGCCGATGTGAAGCCTGAGAAGCACCCG  
GACCGTTCCAGCATACTCCCTGTCTCCGAGGAAGTCTTGTGCAAGGCTTGCCAAAGAGCGGGCCGAGTGTCTTCC  
GCGAAAATTGGAGCCGAGTGAACAATAGTGGACCTAGGAAGAGATGCGTGTTTTCTATCTGCTGGACTACAGGGCC  
ACTACCATCGCTTTCTTTCGAGATGAGAGAAGTCTTCTTAAAATGATCGACAGCACTTGGGTAGAGAAAGGTTGTCC  
TCTCTGTGCCATCTACGTAGCTCTTCAAGTAAATGCGGATGATATTCCAATATCTCTGGAATATCAGCTCCCTTATA  
TCATCCTTTGACACTCTGCTGTGCTCAAAGTCAAATCCATTTTCTGATTGGCTGACAGGATGGTCTCTCTCTGG  
CTTGGAGAGGCTCTAAAGTATGGATCAGTCAATGCCTCTTCCGAGTTGGACGGTCTTCCGGATCAAAAAGCTAATA  
GCTTCTCAAGGTTTTACTCCAAAGGATCTGCATTAGGAACTTCTGAGAAAATGGGACTGGGTCTTTCTTTCTC  
ATACTGCTCAAGTACCTTCTTGTCTTCTCGTTTTCGGACCCGAGAAATTGTATCCATTGAGGGTGTGCCTAGAAGATC  
AGTCATCAAGTCTAAGTATGAGCAACATTTTACCAGGAAACAAAGGTTTTCTGTCAAGACCTCAGCAAAGATGC  
ATCCGATGCTCCAGACATCAATGGCGGGTGTATACTTTGAAAAGAAAGAACACAGAGCTCTGGAGCTCTATACCAT  
CTTGTCCGCAACGTAATCCGTCCAAAAGATTTGTTGGGGGTATCGTTGAATGCAACTCGTGCCAATCCAAAATCACA  
AATCTCAGTTTGCAGTTGGAAATTTGCCAATATATTTTGGCTTAGGTCCCGGTGATAAACATTAGCAGTGTGAA  
TGTACTTCAGAGCCCGAGTAATTGATAAAGAAAGAACTGGTAATGCTCTTGTCAAGTCAATCATTAGCCTTTTATA  
ACCTGGTGGAGATCAGACTCCATGAGCTCAAAAACGACATAAATATCTTTGAAGTCTCTTCTGATGGAGGTAACAT  
GATATGCTTGTATCTCAACAATGTGAGGATGCTTAAAGAGCCTCAGAAGCTTGTATCTCACGGAGAATCCGTGCAGCAT  
CAGATATGTGCTCAAAGATATCATGTATCTTTTATCGCCACTTCTCTCCGGTGTGGAGCTCTATTGGCGGAGCAC  
ACGACACATAGCTCCCTTTCCAAACGATTTCCATCTTGTATCAGACTTGGCTGCGCTCCGTAACCTCAGTAAACCTC  
GGCTCTGCGGAACTCTTCTTGGCTGATCTGCTGCATCTCGCCGCTCACCGGATCTCGCCAGAATCTCTCTCAGC  
TCCCCGTACCGTAAGTAAGGGCGGCAACGACACCAAGCCGCTCCGAATGGACACGGTCTAGACACACGGCA



ATCCAAAGGATCGTCCCTCTGCTGAAGAGGCATTGGCAGATCCATACTTTAATGGACTAGCAAAGGTAGAGCGAGAA  
CCATCTTGTC AACCGATACCAAAAATTGAATTTGAATTTGAGGGTCGTAGAGTAACAAAGGAGGACATCAAGGAACT  
GATCTTTGAAGAAATTTTGGAGTATCATCTCTCAATTTACTGAAGGAGCATATCAGTGGAAACAGACAGACGAAACTTTG  
TTCATTTAAGTGCTGTTGACCAATTTAAGAAAACGCTTCGCTGAACTCGAGGAAAAATGGTGGCGAAAAATGGATCAGCT  
GTTTCGTACAGAGGAAACATTTCTCTTTGCCAAGGCAATCTTCAACCCCTCGT**TAG**ACGTGTAATGTCTGTACAG  
TCAAAACTCACAGGAAAGATCCAAGAAGCTTACCATCTGTACTCCCTTGGCAACCAATATCAAGCACCCGACTCTC  
AGAACCAGTATCTAGTGGGCCAGTGCTTGATGCAACAGGTCCAACCTCCAACACAAATATGTGCCTGGAGGAATGTG  
TGTAGACTCCAGATCAGGGAACCTGTACTTCTATCTGCATCATGGTATAAGGGTTGATATACCAGGTACAGTATCG  
CACAGGCAGTCTGTTCCATAATGGCTCAGTTCGGCTGTACGTTGCAGCATGGCGTTGCCAGGGATGTTTCGAGCTGG  
GTTATCGGCATGAATCATGGAGGACTGACTTTCTTATTTGTGAGTCCCCAAATCATGGAGTCAACCTAGGATT  
CCAGCTTCATCTGTACATGGGATGTTTTCACAGCTTCTTTGCAACCGAGCCCCCAATGTACCAGACAGTTGGATC  
ATAATGTGCCTCCTAGGGATTGCGTTGCAAGCTCGTTGTTCTGAATGATGAACTTTTTCCATGGGAAGCTGTGA  
GGTGGCTAGGTCAAAGAACATGATCGTTGCGATTACATCAACCAGTTGTTAAGAAATACTCCTACATTTTAAACGC  
GAGGACCTTGCTGTGTTTAGCAGTGTGTTAACCAAGAAACTTGAGCATATAGTCTGAATCATTCCAATAGTTGC  
TGTAAGAAATGTGCGAAAGTCAAGTCCAGAGACCAAAATTAAGTCTGTTGTTGAGCTGGGTAATAAATTTGTTG  
TCTCCGTCGATATTGATGTTGTTGAGATTCTGTTTCTACATCTTTTCTCAGATGTATGCCAATTGCTT

**>TsMPK20-4 : contig251629**

CTTACAAGTCGATCGCTCGCACAGACGAAACAGAGACGAGACGGAGCTCCTTGTGTTTGGCCCTTGGCGTTGCCCCAC  
CCTCACCGGGCCACAGGACGAAACCAACGCCACAACAACTCACACCCCTTCGCCCGCGAGTTGCTCAGTCGCAGCG  
AGCCGGGCCACAAGACACGAGCGTTCCGGTTCAGGCTGGGGTTGGGGTTGCGCTCGTTTCATCGTCGATCCGCCAC  
CCCCCATACCGGCCCGGGACAGAGATCTTCCCTCGCGCGCGTGC CGGCGGACAAATGCGGCTTGATTGCG  
CGGCGGACCAGCGCGGTAAGCG**ATG**CAGCCGACAGCAACAGCAGCAGCAGCGGAGGAAGGGTTCACCGGAGATG  
GACTTCTTCAAGTGAATATGGCGATGCTAATAGATACAAGATTGAGAAAGTCAATCGGTAAGGGAGTTACGGTGTGCTG  
TTGTTCAAGCTATTGACCAACATCTGGCGCAAGGTGGCAATCAAGAAAATACACAATATCTTTGAGCATTTATCTG  
ATGCTGCTCGGATCTCCGTGAGATCAAATTAAGTCTCCGCTATTGAGACATCTGATATAGTTGAGATCAGGCATATA  
ATGTTGCCTCGTCAAGGAGGGATTTCAAGGATATTATGTCTCTTTGAGCTGATGGATACAGACCTCCACCAAGT  
CATCAAGGCCAACGATGACTTGACCAAGAGCACCACAGTTCTTCTCTATCAGATGCTTCGTGCACTGAAATATA  
TTCATACCGCTAATGTTTATCATCGTGAATTTGAAGCCAAAGAAATATATGGCAAATGCTAACTGTAACTCAAAATA  
TGTGATTTTGGCTAGCACGAGTGGCATTCAATGACACTCCACGACTGATTTTGGACGGATTATGTTGCTACTAG  
ATGGTATAGGGCTCCTGAGCTTTGTGGATCTTCTTTACTAAGTATTCCACAGCTATTGACATATGGAGTATTGGTT  
GCATTTTGGCGAGATTTAACTGGGAAACCTTTGTTTCTGTTAAAAATGTAGTTCACCAGTTGGATTAAATGACT  
GATCTCTTGGGTACGCCGCTCACTGGATACTGTTTCCAGGATCCGAAATGAGAAGGCAAGGAGTACTTGAGTAGTAT  
GAGGAAAAACAACCGGTATGTTTCTGAGAGGTTCCCAAGCAGATGCTGCTGCCTCAAACTTATGCAGCGGC  
TTTTAGCATTTGACCCCAAGGATAGACCAACGGCAGAAAGAGGGCTTAGCTGATCCATATTTTAAAGGCCCTTGGGAAG  
GTAGAGAGAGAACCATCTGCCAGCCAATATCGAAATTTGAGTTTGAACGGAAAAAGGTGACAAAAGAGGA  
CGTAAAGGAACTTATATTCGCGAGATATGGAGTATCATCTCAACTTCTCAAGGATTACATGAATGGAACCTGAAA  
AAACGAACTTCTATATCTTAGTGTGTAGACAATTTCCGGAGGCAATTTGCTAACTTGGAGGAAAAATGGAGGGAAG  
GGAGGGCAATCGTTCCATCGGACGGAAGCATGTTTCCGCTCCCGCTTTTGGTCTCATGGTACTATGGAATCGCT  
TTACATGACAAAAGATGGTCAAGTATGTCAGGAATTTAGTTCAAGTTTGTGATTGGCATGATAATTTCAAGAGACT  
GCCACTCAACTTTGCTTGCTGACATTTTGCATTTGACAGGACTACTACAGTTTCTTACACCAATTCCTCCAAA  
GATCAGAACTTCCCAAGTTCCCCAAGGATTCCAACAGGTAGACCAGGAAGAGTGGTTGGCCCGTAATACCAT  
TGAGAATTCATGTGCTATGGATCCTTACAGTCAACGAAGGGTGGCGAGGAATCCAGTACTTCTGCAGCTGCTACCA  
ATGATCAGCATACGCATACCAACCGAAAGTCAAGACTTTCAGAGAGAGATTACAGCAGGAGCTTGAAAAAGACCGC  
ATGCAGTACCAGCCGATCGAGCGTTTTCATGATGCCAAGATGGTCTCCCTGACTTGAGGTCTACCTCCTATTACAT  
GCCAAAGGGTGTCCCAAAAGCCGATGTAGCAGAAAGGACTGGTTTGCAGCCAAACATGATGCAGGGAATGCCCCGT  
TTAATGGCATTGCTGCAAGTTGGAGGTAGCTACAATAAGGCCAGTGTGTTCAAGTATGGAGTTCAAGGATGTAC**TAA**  
GTGGTCTAGTGCAGTGGCCACTTCCAAAATGCTTGGCTTAGCTGAAGTAAATAACATCGAAGAATCGAAGTACTTCTCT  
GAGTTGCCTTATGGCGGAAGGTTCAAGCAGTGGATCGATGATCTTTGATCGAGGAGGAAGTTAATGTCTCGTAAAG  
AACAAAAAATAAGATCATGCAAGACACATCTCTGCTGCTGATCTAGCTGCCAAGGAAAGAAATGGCATCTGGTAA  
TTTGCTGCTAAGGGGAAAAGCCGAAGTTGGGGTACAAGAAGATTGAGGCTATGTAGTTTGAAGAACGGAAACAT  
ATCGGAATAATGGAATGGTGAACCTCTGTACATAATAACTTTGATTTTGTATTACTGTCCGCGAGAGCT  
GCCAGTTTGGCTCCATGTTTCAATGTGGCAATGTGATTTATTTTCTGGGTTTGAAGCACTTATGCAGTTATGCTTCTG  
TAGGAGTTCAGCGCTGAATACCTTTGGAGTATGTTTGTACTGTAATAGAATAACAAGACCAACTTCAGTAAGATA  
GAATGGTAATGAACTGCTAGTTTGGGGTGTGTTGGCTCAACCGTGGTTAAAA

>TsMPK20-5 : contig67306

GCCTGCTTGGACTTGTTTAACACCCACCACCGCTCCCTCCTCCCTCCTCCGGGTGACGTGCGCCGCCGACCGGGCCGG  
ACCGCGGGCAGGCGGAGGCGCGGCCCTTCTCTCCTCCCTGGGCGGGCCGCTCCCGTGCTCCCCAGGATGCGGGAGGC  
AAATGCGGGTGGCCGCGGCGGGCGGAGCAGCGCAGCAAGGTTTCAAGTTCAGAGTTCAGACGTGATGAGTTTCTTCAAGTGAAT  
ATGGAGACGCCAGCAGATACAAGATCGAAGAAATAATGGCAAAGGGAGTTATGGAGTGGTGTGTTTCAGCAATCGAC  
CGGCAGACCGGCGACAAGTGGCCATAAAGAAGGTGTCCAACATCTTCGAGCATATAACCGACGCCGCTCGGATGCT  
CCGCGAGATCAAGCTTCTCCGGCTTCTCAGGCACCCGACATCGTCCAGATCAAGCACATTATGCTGCCTCCCTCCA  
GGAGGGACTACAAGGACATATATGTTGTCTTTGAGCTCATGGACACCGACCTCCACCAGGTTATCAAGGCCAATGAT  
GACCTCACAAGGAGCACTACCAGTCTTCTCTACAGATGCTCCGGGCGCTCAAATACATCCATACAGCGAACGT  
CTATCATCGTGATTTGAAGCCAAAAACATATTGGCAAATGCAAACTGCAAGCTCAAGATATGCGATTTTGACTAG  
CAAGAGTTGCATTCAATGACACCCCTACAACCTGTTTCTGAGCGGACTATGTTGCCACTAGGTGGTACAGAGCTCCG  
GAGCTCTGTGTTCTTTCTTTACCAAGTATTCACCGGCTATCGATACATGGAGCATTTGGTTGCATTTTTGCAGAGAT  
TTTGACAGGAAAGCCTTTGTTCCCGGTAATAAATGTGGTTCACCAGTTGGATATGATGACTGATTTCTTAGGCTCAC  
CGTCGCTGACATTATTTCTCGGATTCGAAATGAGAAGGCAAGGAGGTATCTGAGCACCATGAAGAAGAACTGCCA  
GTATCTTTTTCAGAAAAGTTCCCAATGCAGATCCTGCAGCAGTCAAGCTCTTGCAAAAAGCTTCTAGCATTTGATCC  
AAAGGACCGACCCACTGCTGAAGAGGCGTTGGCTGATCCCTATTTCAATGGCCTCGGAAAGTGGAGAGAGAACCAT  
CATGCCAGCCGATTTGCAAAATGGAGTTTGAAGTTTGAACGTAGAAAGTTTACCAGAGAGGACGTCAAGGAACTTATA  
TTCAGGGAGATATTGGAGTACCACCTCAGCTTCTCAAGGATTACAGCAACGGCTCAGAGAAAACGAACTTTCTATA  
TCCTAGTGTGTCGACAACTTCCGGAGGCAATTTGCTAACTTAGAGGAAGATGGAGGAAAGGGCGGGCAGCCGAGA  
GGAAGCATTTTCTCTCCCGGAGTACAACAGTTCACTCTACCCCAAGTTCCTACAACAAAATGTCGGCCCTCCCAA  
GCTCTCAAAGGATTCCAGCAGCTAGACCGGCGAGGTGATTCCTCAGCGACACCAACCGAGAACGCGGCTTCCAC  
CGATCGACAAAATGGGCGAAGGATGGCGAGGGACCCCGCGGCTAGCAGCAGCGGCGCCGGCTACCACCAGAGGCGCG  
ACTGCTCCGACAGGCAACAGGAGGTGGAGAAGGACCGCGCCTACAGGCCGGCGCACCATTTTCAGGGACGCCAGG  
GTGGCGCCGAGGCGAGGCGCGGCCCTCGGCGTACCACATTTCCCGGTTCAACGGCATCGCCCGGTCGCGCGGCGG  
GTACAGCAAGGTTCGGCTGGCAGGAAGGATGTACTAGCGCAATTGCTGGCGAGTTTGGCGGAGGTTGGAGGAGGCGC  
CGCGATCGATGGCCGTTGTGGGAATGCAGGGGCTGGGAGGTTCTCAAATTTAGGACGTAGGAGACAGCCGGACAAG  
GTGTGTCTTGTGTACATAGATATTACCGGCAGCCAAATGGTTGGTCTGTTTTCTGGGTTGATAGATATGTTGA  
AAGTTGGAACAGTGA

>TsMPK20-5 : contig67307

GCCTGCTTGGACTTGTTTAACACCCACCACCGCTCCCTCCTCCCTCCTCCGGGTGACGTGCGCCGCCGACCGCACCGG  
CGGCGGGGCGAGGCGCGGCGCGGCGGCTTCTATCTCCCGTGCTCCCCAGGATGCGGGAGGCAAATGCGGGTGCC  
CGCGGCGGGCGGAGCAGCGCAGCAAGGTTTCAAGTTCAGAGTTCGGACGTGATGAGTTTCTTCAAGTGAATATGGAGATGCAAG  
CAGATACAAGATTTAGGAAATCATCGGCAAGGAGTTATGGGGTGGTATGTTTCAGCCATCGACCGCAGACCGGCG  
ACAGGGTGGCCATAAAGAAGGTTTCCAACATCTTCGAGCAGTCAACCGACATAAACCAGCCGCTCGGATGCTCCGCGAGATCAAG  
CTTCTCCGGCTTCTCAGGCACCCCGACATCGTCCAGATCAAGCACATAATGCTGCCTCCCTCCAGGAGGACTACAA  
GGACATATTTGTGCTTTGAGCTCATGGACACGGACCTCCACCAGGTTATCAAGGCCAACGATGACTTGACAAAAGG  
AGCACTACCAGTTCTTCTCTACCAAGATGCTCCGCGGCTCAAATACATCCATACTGCTAACGTTTATCATCGTGAT  
TTGAAGCCAAAAACATATTGGCAAATGCAAACTCAAGTCAAGATATGTGATTTTGACTAGCAAGAGTTGCATTT  
CAATGACACCCCTACAACCTGTTTCTGGACGACTATGTTGCCACTAGGTGGTACAGAGCTCCGGAGCTCTGTGGTT  
CTTCTTTACCAAGTATTCACCGGCTATTGATACCTGGAGCATTTGGTTGCATTTTTGCGGAGATCTTGACAGGAAAG  
CCTTTGTTCCCTGGTAAAAATGTGGTTTCAGCAGTTGGATATGATGACTGATTTCTTAGGCTCGCCGTCGCTGAGAT  
TATTTCTCGGATTCGAAATGAAAAGGCAAGGAGGTACTGAGCAGCATGAGGAAGAACTGCCAGTACCTTTTGAC  
AGAAGTTCCCAAGGCAGATCCTGCAGCAGTCAAGCTCTTGCAAAAAGCTTCTAGCATTTGATCCAAAGGACCGACCG  
ACTGCTGAAGAGGCGTTGGCTGATCCCTATTTCAACGGCTCGCGAAAAGTGGAGAGAGAACCATCATGCAACCGAT  
TTCGAAAATGGAGTTTGAAGTTCGAGAAAGTTTACCAGAGAGGACATCAAGGAACTTATATTCAGGGAGATAT  
TGGAGTACCACCTCAGCTTCTCAAGGACTACACCAACGGCTCTGAAAAAACAACCTTTCTATATCCTAGTGCCGTG  
GACAACTTCCGGAGGCAATTTGCTAACTTGAGGAAGATGGAGGAAAAGGCGGGGACCCGAGAGGAAGCATGTTTC  
TCTCCCGAGGACTACAACAGTTCACTCTACCCAGTTCTTACAACAAAATGGCCCGGCTCCCAAGCTCCTCAAAGGA  
TCCCAACAGCCCGACCGAGGAGTGTGCTCAGCGATACCGACCGAGAACACGGCCTTTGCCGATCGACAAAACA  
GGTCAAGGATGGCGAGGGACCCCGCAGCGCTCCAGCAGCAGCGGTTGTTGGCTACCACCTGAAGCCGGACAGCTC  
CGACAGGCAACCAGAGCAGCAGCAGGAGGTCGAAAAGGAGCGCGCGCTACAGGCCGCGCACCATTTACAGG  
ACGCCAGGGTGGCGCTGAGGCCGAGGCGCGGCCCTCGGCGTACCACATTTCCCGGTTCAACGGCATCGCGGCGGCG  
GCAGCGGTTACAGCAAGGTCGGCGGCGGAGAGGATGTACTAGCGCAATTGCTCGGCAATTTGCCGGGAGCTGG  
AGGACGGCCGACCGCTGTTGGGAATGCAGGAATTTAGGAGGTAGGAGACAGCCGAAGAGGTTGGTGTCTTGTGTA  
CATATATATTACCGGCAGCCAAATGGTTGGTCTGTGGTCTGGGTTGATAGATAGTTGATGAAAGTTGAAACAGTA

TGCTCTGCTTATCTGAGAGGTGAAGCGCCTCTGTTGAGGAGGGAGGGGAGGGGTTGAGGGGCTGTTTTCTTTTTTCT  
TTTTTGTCTTCTGGATTGTGTTAATAGGATGGATGAATAAATCGAGGCTTCTCTGTGGTAAAC

**>TsMPK21-1 : contig53625 (partial)**

GGAGTCCCGGCTGTAG**ATG**CCCTCCCCTCCCCTCGTTTTAAAACCGCAGCCGCTCCTCCTCCCCACTTCCCCTCCTG  
CACCACCCACTCCGCCGAGAAACAGCAACAGCCACAGCCACGCGCACACCCAGATCGTCGATAGCGATGGCAGCG  
GCAGCAGCAGCGGCAGCGGGAACGAGGGAGGAGATGGTCTACATGGCGAAGCTGGCGGAGCAGGCCGAGCGGTACGA  
GGAGATGGTCGAGTTTATGGGGGAGGCCGGGAGGCTGCGCGTCCGCTACCCCGCGCCCGCGCGCACCAACCCGC  
CGCCACGCATGGATCCCGCAAGAAGACCTCGGAATCCGAGTTCTTACCGGAGTATGGTGAAGTTAAACCGGTATCAG  
GTCAGCGAGGTCATTGGCAAAGGAGTTATGGAGTTGTGGCTGCTGCTATCGACACCCAGACCAGCGAGCGTGTGGC  
CATCAAGAAGATCAATGACGCTTTTGATCATGTCTCCGATGCCACCCGCATCCTTAGGGAGATCAAGTTGCTCCGGT  
TGCTGCGCCACCCGACATAGTTCAGATCAAGCACATATATGCTCCCCCTTCAAGGAGGGAATTCAGGGACATATAT  
GTGGTCTTTGAGCTGATGGAGTCCGATCTCCATCAGGTAATAAAAAGCGAACGATGATCTCACACCAGAGCATACCA  
GTTCTTCTTGATCAGCTGCTCCGGGAATGAAGTACATCCATGCAGCGAGTGTTCATCCGGGATCTTAAGCCCA  
AGAATATTTAGCGAATGCTGACTGCAAGCTGAAGATTTGTGATTTTGGGCTTGCCCGTGTATCATTAAATGACCGG  
GCTCCATCAGCCATATTTGACGCGACTATGTTGCAACTAGATGGTATCGTGCTCCAGAATGTGTGGCTCTTTTTT  
CTCAAAGTACTCCTGCAATTGATATTTGGAGCGTAGGGTGTATCTTTGCGAAGATGCTCACAGGGAGGCCACTCT  
TTCAGGGAAGAATGTTGTCCATCAATTGGATCTCATGACTGATGACTTGGCACTCCTTACGAGAATCTCTCGCT  
AAGTACGGAAATGAGAAAGCTCGCGATACTTGAGCAATATGAGGAAGAAGCCTAAAGTTCCCTTACCAAAAAAT  
TCCAGGCATCGATCCTATGGCTCTCCATTTGCTTGAGCGTCTTCTTGTCTTTGATCCTAAGGATAGGCCAACTGCTG  
ACGAGGCCCTGACAGACCCATACTTTAACGGATTAGCAAATTCAGAACGTGAACCCATAGCACAGCCCATCTCAAAA  
CTTGAGTTTGTAGTTCGAGAAGAGAAAGTTGGCAAAGATGATGTCGAGAATTAATTTACAGAG

**>TsMPK21-2 : contig68757**

TCCGGACCGGAGCACGGGGGACTGGCGCGCGGGCGCC**ATG**GCTAAAAAGGGCTCGGATAAGGCGGGCTTCTTAC  
GGAGTACGGCGAAGCGACCCGGTACGAGGCTGCGAAGTGGTCCGCAAAGGCAGCTACGGCGTCGTGGCGTCTGCCG  
TCGACACCCACACCGGCGAGAGCGTCCGATCAAAAAGATCGACGACGCTTTCGAGCATGTCCGCCAGCCACCCGC  
ATTCTCCGCGAGATCAAGCTGCTCCGCTTCTGCGCCATCCAGACATCGTCCAGATCAAGCACATCATGCTCCCGCC  
GTCGCGCCGCGAGTCCCGTGACATCTACATAATCTTCGAGCTCATGGAGTCCGACCTCCACCAGTTCATCAAGGCCA  
ACGACGACCTCAGCCCGGAGCACCATCAGTTCTTTTTTACCAGCTGCTTCGTGGGATGAAGTACATACACGCTCC  
AATGTCTTCCACCGGGACCTCAAGCCCAAGAACATTTAGCCAATGCCGATTGCAAGCTCAAGATTTGCGACTTCCG  
CCTTGCTCGGTTTCTTTGACGACACCCCGTCCGCGATATTCTGGACGGATTATGTAGCAACAAGGTGGTATCGTG  
CTCCAGAATTTATGTGGCTCCTTCTTTCAAAGTATACTCCTGCGATTGATATTTGGAGCATAGGATGTATATTTGCA  
GAAATGCTTACAGGGAGGCCGCTTCTTCCGCAAAAATGTGGTACATCAATGGATCTCATGACTGATCTACTCGG  
CACTCCTTCCGCGAGAATCTATTTCTAGGATTCGAAACGAAAAAGCTCCGCGATATTTGGGAACATGAAAAAGAAC  
ATCCAATACCTTTTTCTCAGAAGTTTCTGGTGTAGATCCCATGGCACTCCATTTGCTTGAGCGTCTTCTTGTCTTT  
GATCCCGCAGATCGGCCAACCGTGCAGAGGCCCTTGGCAGACCATACTTTACTGGATTGGCAAATTTGAACTCGA  
ACCCACAACGCAACCCATCTCGAACTTGAGTTTGAGTTTGGAGAGAAGGAAGCTGGCCAGAGAGGATTTACGTGAAT  
TAATCTACAGAGAGATTTTAGATACCATCTCAGATGTTGCAAGAATACCTACGTGGAGGAGACCAGATGAGCTTC  
ATGTACCCTAGTGGGGTGGATCGCTTTAAGCAGCAATTCGCTCATTGAAAAAGGTGGTGAAGGGTGAATAATC  
CAGTCCACAGTTGCGACAAAATGCTTCTTACCAAGGGAAGGCAATTTGGCAATAAGCACGGAGATAGTGAGTACC  
AAGTAAAGCTGAATGCAGGTGAGAAGCCAGTACATGCATCAGTGACAGATGGAATAAGCAAACCCCTCATGAGCGCT  
CGGAGCTTACTGAAGAGTGAACCATGAGTGCTTCCAAGTGTATAGGTGAAATAAAAAATAAAGATGATGAATACGA  
GAGCGTGGATGCAGCTGACGGCGTCTCTCAGAAGATCGCTCAACTGAAAACCT**TGA**TTTTCGAAGGTTACAGAAGCGA  
TTGGTAGTATATACTATGTACAACAGCATGTCTATAGGCGCTCAAGATCAGAATGATCTTTAACCAGCAAGAAAT  
TCTATAACAACAATAAGACCACAAAATCATCTGTTATGGTAACCTTGTGTGCTGTAATGTAATAATTTCTACTCGT  
TTTTTGTACTTTGTCAAAGAACCATGTCTAACCAGCAAGCTAGTTCCTCGTCTTTTCCCTCGGAGGAGCTGCCATGAT  
CCTGTACAATTTTGTCAATATGAAGTATCACGCCCTATATTTCTGTTTATATGGTGTCTATTTCTGATCTTGTAACC  
TTCTGCAATCAGAGATGCTCTTTGCTCTGTTAATTTATGCAAAATGTTTGTCTAGAGACGCTCCTTGTGCCCGCTAT  
ATATGCAAAATGCTTGCCATATTTTCCA

**>TsMPK21-2 : contig201182**

TCCGGACCGGAGCACGGGGGACTGGCGCGCGGGCGCC**ATG**GCTAAAAAGGGCTCGGATAAGGCGGGCTTCTTAC  
GGAGTACGGCGAAGCGACCCGGTACGAGGCTGCGAAGTGGTCCGCAAAGGCAGCTACGGCGTCGTGGCGTCTGCCG  
TCGACACCCACACCGGCGAGAGCGTCCGATCAAAAAGATCGACGACGCTTTCGAGCATGTCCGCCAGCCACCCGC  
ATTCTCCGCGAGATCAAGCTGCTCCGCTTCTGCGCCATCCAGACATCGTCCAGATCAAGCACATCATGCTCCCGCC  
GTCGCGCCGCGAGTCCCGTGACATCTACATAATCTTCGAGCTCATGGAGTCCGACCTCCACCAGGTTCATCAAGGCCA

ACGACGACCTCAGCCCGGAGCACCATCAGTTCTTTTTCTACCAGCTGCTTCGTGGGATGAAGTACATACACGCTGCC  
AATGTCTTCCACCGGGACCTCAAGCCCAAGAACATTCTAGCCAATGCCGATTGCAAGCTCAAGATTTGCGACTTCGG  
CCTTGCTCGGGTTTCTTTGACGACACCCCGTCCGCGATATTTCTGGACGGATTATGTAGCAACAAGGTGGTATCGTG  
CTCCAGAATTATGTGGCTCCTTCTTTCAAAGTATACTCCTGCGATTGATATTTGGAGCATAGGATGTATATTTGCA  
GAAATGCTTACAGGGAGGCCGCTCTTCCCTGGCAAAAATGTGGTACATCAATTGGATCTCATGACTGATCTACTCGG  
CACTCCTTCGGCAGAATCTATTTCTAGGATTCGAAACGAAAAAGCTCGGCGATATTTGGGAAACATGAAAAAGAAC  
ATCCAATACCTTTTTCTCAGAAGTTTCTGGTGTAGATCCCATGGCACTCCATTTGCTTGAGCGTCTTCTTGCTTTT  
GATCCCGCAGATCGGCCAACCGCTGCAGAGGCCCTTGGCAGACCATACTTTACTGGATTGGCAAATTTGAACTCGA  
ACCCACAACGCAACCCATCTCGAACTTGAGTTGAGTTTGGAGAGAAGGAAGCTGGCCAGAGAGGATTTACGTGAAT  
TAATCTACAGAGAGATTTTAGAGTACCCTCAGATGTTGCATGACTATCTTCGTGGTGGAGATCAGGCAAACTTT  
CTTTACCAAGTGGGGTGGATCGTTTCAAGAGGCAATTTGTTTCATCTCGAAGAAATCGGTGCTAAGGGTAAAAAGAC  
TAGCCCGCAGCTGCGGCAGCATGCTTCTTACCAAGGGAAAGAGTTATCGGCAGTGATGATCCTGAAAAGCCAAATG  
CAGACTACTGTATAAAATTCATGTAGGTGAGCTACCAGGTCACACATCGGTGACGGATGGCCTTAAACAAGCCACTG  
TTGAATACTCGAACTTCTTGAAGAGCGAAAAGCATTGGTGCCTCCAAGTGCATCGTCTCAAAGAAAAGCGAGAAAA  
AGATGAGGAATCTATGTCTGAGTATATGCATGAAGCATCTGAT**TAG**GAAAGCGAAAAGGATTGCTCAACTCAAAAAGTT  
TGTGATGGTACGGGGAAAAACAGAAGCACGTCGATCCATGGGGGCTTCACTTCAGAATCCCGAGCGCACGAATCAGA  
TCGATGAACCACTGGTGCCTGTCCTGTCGGTGCCTGTCGGATAGTCATCTCATTGGTTAGCAGAGCCTAGGATTTA  
TTTCAATTTTTGGGCACAACCTTGTATCGATGCTCCATTCATGTAACAGTAGAGTTTAGAATGTAACCAACAGAG  
TGTACAATTTCTTTTTCTAAAACAGAGTGTACAATTGTAACCAACATATACTGGAGTACATGGCTCGACTTCTTAT  
CACTCGTGCAGTGCTTTCTT

**>TsMPK21-2 : contig221182**

TCCGGACCGGAGCACGGGGCGACTGGCGCGGGCGGCC**ATG**GCTAAAAAGGGCTCGGATAAGGCGGGCTTCTTAC  
GGAGTACGGCGAAGCGACCCGGTACGAGGTCTGCGAAGTGGTCGGCAAAGGCAGCTACGGCGTCTGTGGCGTCTGCCG  
TCGACACCCACACCGGGGAGAGCGTCCGCATCAAAAAGATCGACGACGCTCTTCGAGCATGTCCGCGACGCCACCCGC  
ATTTCTCCGCGAGATCAAGCTGCTCCGCCCTTCTGCGCCATCCAGACATCGTCCAGATCAAGCACATCATGCTCCCGCC  
GTCGCGCCGCGAGTTCCGTGACATCTACATAATCTTCGAGCTCATGGAGTCCGACCTCCACCAGGTCATCAAGGCCA  
ACGACGACCTCAGCCCGGAGCACCATCAGTTCTTTTTCTACCAGCTGCTTCGTGGGATGAAGTACATACACGCTGCC  
AATGTCTTCCACCGGGACCTCAAGCCCAAGAACATTCTAGCCAAATGCCGATTGCAAGCTCAAGATTTGCGACTTCGG  
CCTTGCTCGGGTTTCCCTTTGACGACACCCCGTCCGCGATATTCTGGACGATTATGTAGCAACAAGGTGGTATCCGT  
CTCCAGAATTATGTGGCTCCTTCTTTCAAAGTATACTCCTGCGATTGATATTTGGAGCATAGGATGTATATTTGCA  
GAAATGCTTACAGGGAGGCCGCTCTTCCCTGGCAAAAATGTGGTACATCAATTGGATCTCATGACTGATCTACTCGG  
CACTCCTTCGGCAGAATCTATTTCTAGGATTCGAAACGAAAAAGCTCGGCGATATTTGGGAAACATGAAAAAGAAC  
ATCCAATACCTTTTTCTCAGAAGTTTCTTGGTGTAGATCCCATGGCACTCCATTTGCTTGAGCGTCTTCTTGCTTTT  
GATCCCGCAGATCGGCCAACCGCTGCAGAGGCCCTTGGCAGACCATACTTTACTGGATTGGCAAATTTGAACTCGA  
ACCCACAACGCAACCCATCTCGAACTTGAGTTGAGTTTGGAGAGAAGGAAGCTGGCCAGAGAGGATTTACGTGAAT  
TAATCTACAGAGAGATTTTAGAGTACCATCCTCAGATGTTGCATGACTATCTTCGTGGTGGAGATCAGGCAAACTTT  
CTTTACCAAGTGGGGTGGATCGTTTCAAGAGGCAATTTGTTTCATCTCGAAGAAATCGGTGCTAAGGGTAAAAAGAC  
TAGCCCGCAGCTGCGGCAGCATGCTTCTTACCAAGGGAAAGAGTTATCGGCAGTGATGATCCTGAAAAGCCAAATG  
CAGACTACTGTATAAAATTCATGTAGGTGAGCTACCAGGTCACACATCGGTGACGGATGGCCTTAAACAAGCCACTG  
TTGAATACTCGAACTTCTTGAAGAGCGAAAAGCATTGGTGCCTCCAAGTGCATCGTCTCAAAGAAAAGCGAGAAAA  
AGATGAGGAATCTATGTCTGAGTATATGCATGAAGCATCTGAT**TAG**GAAAGCGAAAAGGATTGCTCAACTCAAAAAGTT  
TGTGATGGTACGGGGAAAAACAGAAGCACGTCGATCCATGGGGGCTTCACTTCAGAATCCCGAGCGCACGAATCAGA  
TCGATGAACCACTGGTGTCCGGATGGTATCTCCGTGGTGGCATAATTTCAATTTTTGGCCGCAAGATCGATA  
CTCCCATTCATGTAAGTGTAGAGTTTAGAATGTAACCAACAGTGTAGATACTACTAACCACATATACTGGAA  
TACATGACTCGACTTCTTATTACTCGTGGAAATGCTTTCTTA

**>TsMPK24 : contig116794**

ATCTTGCTCCGTCTTGTACCCAATCAGCACAACGCCCGATTGCTTCTTATCTGTTAATTTGCTTCTTGTGGCTGC  
AGGCACCACTTTTTGGCCTTGGCGTGCAGACTTTGGATATAATCCCGATTAGCTTATCGCATCCTCGCTAATTGGTA  
ACATTGGGC**ATG**GAGTTCTTACAGAATATGGGGAGGCAAGCCAGTATCAGATCGAAGAGATCATTGGCAGGGGAAG  
CTTCGGAGTAGTTGCTGCTGCAGTAGATACCCAACTGGGGAGCGGGTTGCGATCAGAAGATACATGATATGTTG  
AGCATGCCTCAGATGGCACCCGATCTTTGGGAAATCAAGCTTCTTCGGCTTCTCCGCCACCCAAACATAGTTGAG  
ATCAACACATCCTGCTCCCCCTGCCCGAAGGGAGTTTAGAGATATTTATGTTGTTTTGGCTCATGGAGTCAGA  
CCTACAAAAGTGATCCAAGTAAATGAGAACCTCACCGAGGGCATCACCGGTATTTCTTGTATCAACTTCTTCATG  
CCCTCAAGTACATCCATGCAGCTAATGTATTTTCATCGTACTTAAACCGAGCAACATACTTGTCAATTCGAACCTGC  
AAACTAAAGATCTGTGACTTTGGGCTTGCACGCCCATTTGGATGATGCTCCCTGGCTATATTTGGACTGACTATGT

GGCTACAAGGTGGTACCGTGCTCCTGAATTATGTGGCTCATTTTTCTCCAAATACACCCCTGCAATTGATATTTGGA  
GCATAGGGTGCATATTTGCTGAAGTTCTCACTGGAAAACCATTTCTCTGGGAGGAATGGCACACCCAACCTAGAT  
CTGATAACAGATGTCCTTGGAAATCCATCATGTGAAACCCATCCAGATTCGTAATGAGAAGGCGAGGAGATATTT  
GACTGGCATGAAGAGGAAACATCCTATCCCTTTGCTAGTGTGTTTGTAAATGCCGATCCTAAGGCTGTCCGTCTCC  
TAGAACGCCCTACTCGCATTTGATCCTAAAAGATCGACCTACTGCTGAAGAGGCTTTAGCTGATCCATATTTGAAGGA  
CTTCGTAAGTTGGAACATGAGCCTTTACCACACCCCTTTTCAAACCTTGAGTTTGAATTTGAGAGATTGAAGCTAAC  
AAAGGGTGGTGAAGAGATCTGATATATCGAGAGATTTGGAGTACCATCCACAGATGCTTCAGGATTATATCAGAG  
CTGGAGGACAGACTAGTTTCGTCTATCCAAGTGGGGTTGATGGTATGAGGCTGCAGTTTGTACATCTTGAGGAGAAC  
CACCTGAGAGGAGAAAGAGGCACTCCACTGCGGAGGCGACATGCATCTTTGCCAAGGAAAGAGTCTGTGCACCAAA  
AGGTAGCGATAATCAAGACTGTAAACAATGAGAGAAGGAGGACAGCATCTTCTGCTGCCAAAACCTACCATAAAGATCAC  
AACAAAGAGGGGCTGACACATGCATATGTTTATCAAATGGCACAAGCATTCCGAACCTCTGCTCTGGGTATTACTTG  
CAGAATGGTAGTACCAGTGTCTCCAGTTGTGTCATCGAAGAGAATGAAGGCTGGAGGAGAACGGCGTCTCCGAGGA  
GGAGAAGGTGGCCTATGAACTGTCCGAAAGGCTTGCCAGGATCTAGC

**>TsMPK25 : contig146788**

GTACATGGGGAAGCCGACGTGAGTTCTTCCCTCACAATTGCCACTCCTCTGTGCTCAGCTCAAGCGCAGTGTGGTACTGC  
TGTGTCATTGACGGTTACATCTGTGCTTCCGAGAAAAAGAAAATGGCGAAGATGGTACGTCCTCCGAATGG  
CAAGGGAAGCATGGCAAGCATTAATACTACTATGTGCCAGACAATGTTTGGAGATCGACACAAAGTACGTGCCAATCA  
AGCCATCGGAAGAGGATCTTACGGGATCGTTTGTCTCATCGGTGAACAAGGATACGAACGAGCAAGTCCGGATAAAA  
AAGATAAACAAATGTCCTTTGACAACCGTGTGGATGCGTTGAGGATGCTGCGAGAGATGAAGCTCCTTCGGCACTTCGC  
TCATGAGAATGTCATTGCTTTGAAGGATATAATGATGCCAATACAGAAGAGGAGCTTCAAAGATGTCTACTTGGTCT  
CTGAACTGATGGACACAGATCTGGATCGGATCATCAACTCGTCTCAAACGCTTTTCGAATGACCAGTGTCAATATTTTC  
CTTTTTACAGTGTCTCCGAGGCTGAAGTATCTTCAATCAGCAGGGATACTCCATAGAGACCTGAAACCACTCAACCT  
TCTAGTTGATGGAACATGTGACCTGAAGATCTGTGACTTTGGTCTTGGCCGAACAATAATACTGAAGATCAGTGTGA  
TGACTGAATATGTTGTGACCCGCTGGTATAGAGCTCCAGAGCTGCTGCTCTCAAACGACAACCTATGGCACCTCCATA  
GATGTCTGGTCTGTTGGCTGCATCTTTGCCGAGCTTCTTGGCCGAAGCCGATCTTCCCTGGAACCGACAGCCTAAA  
TCAGCTTACAGTTATAGTTAATGTTCTTGGCACCATGAACAATGCTGACCTTGAGTTTATTGATAATCCGAGACCCC  
ATAGTTACATCAAATCCCTTTCATACACCCGCTGGGATTCCTCCACCGAATGTACCCACAAGCGCACCCGCTTGGC  
ATTGACCTGTTGCAGAAGATGCTGGTCTTTAATCCTTCCAAAAGGATAGTGTCACTGAGGCTTGGAGCACCCCTA  
TATGTCTAGGTTGTATGATCCGAGCGTAAGTCTGCTCCTGCTCAGGCACCCATCAATCTTGATATAGATGAAAACCTCA  
GCGTGGAGATGCTCCGAGAAATGATGTGGCAGGAGATGCTCCAGTACCACGAGGCTGCCATGATGGTGAATATGTGA  
CAAGCATGAATGGACATGTGAAGAGCTATTTGCCACACACCCACAGTAGGGTCTCGCATGTCGTTTTTATATAAAG  
CTTACAGTGATTATTGACGCTATAAAGTACTCAAGTTA

**>TsMKK3-2 : contig143511**

GCTCACCGCCCGCCCTCCTCCCCCGCTCACCGCCTCCTCACCGTCCGTCCCAACCCCTTCGGCCCTTTGTATC  
CTCCGCTATCCGCCCCTACAGATCCGTCGGCGAGATCCTCAGCCGCCCCGACGGGCTCGCCGCGCCAGGACCT  
CACCGCTGCCCCCTCACCGCAAGAGAACCAGGTCGCCCAAGCTCCAATTTTTGCCTGGGGAACAGACCCGCC  
GCCGCTTCTCTGCTCCACTGAAGATACGGTGAATCCTTCCCTGCTTGGACGACTGGGATCATCAGCTTGCCTGGCT  
GACTACAAGCGAGCCCCATGGCGGGGTAGAGGAGTTAAAGAAGAAGTGCAGCCCTTGCTGTTTCGACGACTCCGA  
CAAGGGCGGCTCAGCACCCGGTTCCTTCCCGGAGGATACATGCGATTCTATGTGGTATCTGATGGTGAACGA  
TAAATTTACTGAGTAGATCGTTTGGTGAATATAACATCAATGAGCATGGCTTTCACAAGCGAAGTACTGGGCCAGAA  
GAGCCCGATACCCGGTGAAGAAGGCATACCGATGTGCATCTGAAGACATGCATATATTTGGTCCATTGGAAGCGGAGC  
AAGCAGCGTTGTTTCAGAGAGCTATTTTCATACCAGTTCATCGTATTCTGGCCTTGAAGAAGATAAACATATTTGAGA  
AGGAGAAAAGGCAACAAATTTCTAATGAGATGAGAACGTTATGTGAAGCAAGTTGCTATCCTGGTTTTAGTTGAATTC  
CAGGGTGCATTTTACATGCCGATCTGGACAAATAAGCATTGCCCTTGAATACATGGATGGTGGCTCTTTAGCAGA  
CGTTATAAGAGTCAAGAAATCAATACCAGAGCCAGTTCTTGCACATATGCTACTGAAAGTATTACTTGGCCTGAAGT  
ACTTGCATGAAGTAAGACATCTAGTGCATAGAGATCTAAAGCCAGCGAATATACTGGTAAACCTCAAGGGAGAGGCA  
AAAATTCAGACTTTGGTGTAAAGTGTGGTGGTGGACAAATACAATGGCTATGTGTGCTACCTTTGTAGGCACTGTGAC  
ATATATGTCACCTGAGAGAATTCGTAATGAGAACTACTCTTATGCTGCTGATATTTGGAGTCTTGGACTAACGATAT  
TGGAGTGTGCTACTGGTAAATTTCCATATAATGTCAATGAAGGCCAGCCAATCTCATGCTGCAGATACTCGATGAT  
CCATCACCAGACCACCAGAAGATGCCTATACACCAGAATTTTGTTCCTTCATAAATGATTGCTTGGCGAAAAGATGC  
TGATGCAAGGCCATACATGCGAGCAGCTTTTGTGCACACCCATTCATCAAGAGGATGAGCAAACCTGGTGTGGACTTGG  
CAGCATATGTAGGGGTGTTGTTAACCCAAACAGAAAGATTAAGCAAATAGCAGAGATGCTTGTGTTTCAATATTAC  
CTCCTGTTTTAATGGCTCTGAAGGACCTTGGAAATCATATGAAGACATTCACAGGGGAAGAATCATCTTTCAGTTTTTC  
AGGGAATGTGTATGTCGGACAAAGTGCATATTTGATACTTTATCAAATATAAGAAAGAAGTTAAAAGGTGATCGGC  
CTAGAGAAAAAATTGTTTATGTTGTTGAGAAGCTACACTGCCGTGCGAATGGGGAAACAGAAATCGCTATTCGTGTG

TCTGGGTCAATTCATCACGGGCAACCAATTCCTAATATTTGGTGAAGGGTTGCAAGCTGAAGGGATGCCAGCTTGGACGGAATTGATATCGACATTCGAAGCAAGCGGTAGGCCAGTTCGCGGAGCAGTTCACCGTGCATCCAGGGACTTCCA TGGGGTGCTACTACATAGCAAAGCAAGACCTCTACATCGTTTCAGTCC**TGA**AAACAATGTATAAACTGTAAGTTATGT TCCGTTTGTGCCGTCAATGATTCAGTTCGCCGATGAAAGCTAGCTATGTCATGGTTTCCACTTCTCGCGGCCCTT GACTTCGACATCGACAGGCTTGAGACCACAACGCAGTCTGCTACCATTGACATTGATTCCATTTCTTCTCGATGCG AGCAATCAAACCTGTAGCTGAAACATAACTTGATCGTTGACCCTTGTGTAAGGTGGCAAGGAGGATGAAGCGAT TCTAATGATTGTGTGCATAGATAGATACTTTGACACATGGTTCGCGGGTTTATTGAGGCTGCTCGATTCTGTGGT AGATGAGAAGATTGCGCGTGTGCGCTAATAAGTGACGCAGCCCAATGTAGGTCTGTACTACTCATGCTTATGTGGG AAAAAAGACTATCTATAA

**>TsMKK3-2 : contig224242**

GCTCACCGCCGCCGCTCTCCCCCGCTCACCGCTCCTCACCGTCCGTCACCAACCCCTTCGCGCCCTTTGTATC CTCCGCTATCCGCCGTACAGATCCGTCGCGGAGCATCCTCAGCCGCCCGGACGGGCTCGCGCCGCCAGGACCT CACCGTGCCTCCCTCACCGCAAGAGAACCAGGTCGCGCCAAGTCCAATTTTTCGCTGGGGAACAGACCGCCC GCCGCTTCTGTGCTCCACTGAAGATACGTTGATTCCTTCCGCTTGGACGACTGGGATCATCAGCTTGCGCCGCT GACTACAAGCGAGCCCC**ATG**CGGGGCTAGAGGAGTTAAAGAAGAAGCTGCAGCCCTTGTGTTTCGACGACTCGGA CAAGGGCGGCTCAGCACCCGGTTCCTTCCCGGAGGATACATGCGATTCCATGTGGTATCTGATGGTGAACGA TAAATTTACTGAGTAGATCGTTTGGTGTAGTATAACATCAATGAGCATGGCTTTCACAAGCGAAGTACTGGGCCAGA GAGCCCGATACCGGTGAGAAGGCATCCGATGTGCATCTGAAGACATGCATATATTTGGTCCATTGGGAAGCGGAGC AAGCAGCGTTGTTTCAGAGACTATTTTCATACCAGTTTCATCGTATTCTGGCCTTGAAGAAGATAAACATATTTGAGA AGGAGAAAAGGCAACAAATTTCTAATGAGATGAGAAGCTTATGTGAAGCAAGTTGCTATCCTGGTTTAGTTGAATTC CAGGGTGCATTTTACATGCCGATTTCTGGACAAATAAGCATTGCCCTTGAATACATGGATGGTGGCTCTTAGCAGA CGTTATAAGAGTCAAGAAATCAATACCAGAGCCAGTTCTTGCACATATGCTACTGAAAGTATTACTTGGCTGAAGT ACTTGCATGAAGTAAGACATCTAGTGCATAGAGATCTAAAGCCAGCGAATATACCTGGTAAACCTCAAGGAGAGGCA AAAATTCAGACTTTGGTGAAGTGTGGTTTGGACAATAACAATGGCTATGTGTGCTACCTTTGTAGGCACTGTGAC ATATATGTCACCTGAGAGAATTCGTAATGAGAACTACTCTTATGCTGCTGATATTTGGAGTCTTGGACTAACGATAT TGGAGTGTGCTACTGGTAAATTTCCATATAATGTCAATGAAGGCCAGCCAATCTCATGCTGCAGATACTCGATGAT CCATCACCAGCACCACCAGAAGATGCCTATACACCAGAATTTTGTTCCTTATAAATGATTGCTTGGCGAAAGATGC TGATGCAAGGCTACATGCGAGCAGCTTTTGTACACCCATTCATCAAGAAGTATGAGCCAATGGTGTGGACTTGG CAGCATATGTCAGGGGTGTTGTTAATCCAACAGAGAGATTAAGCAAATAGCAGAGATGCTTGTCTATTATTAC CTCCTGTTTGTATGGCTCTGAAGGACCTTGGAAATCATATGAAGACATTTCTACAAGGAAGAATCGTCTTTCAGTTTTTC AGGAATGTGTATGTCGGACAAAGTGCCATATTTGATACTTTGTGCAATATAAGAAAGAAGTTAAAAGGTGATCCGC CTAGAGAAAAAATGTTTCATGTTGTTGAGAAGCTACATTTGCTGTCGCAACGGGGAATCAGAAATCGCTATTCGTGTG TCTGGATCATTATCACGGGCAACCACTTCTAATATTTGGTGAAGGATTGCAAGCTGAAGGGATGCCAGCTTGGAC CGAAATTTGGTGTGACTTTCCAAGCAAGCGGTAGGTCAGTTCCGGGAACAGTTCACCGTGTCTTCAGGGACTTCCA TGGGGTGCTACTACATAGCAAAGCAAGACCTCTACATCGTCCAGTCC**TGA**AAATAATGAACAAAGTTTATGTTCCGT TTGTGACGTCAATGATTCCAGTTGATGATGAAAGCTATGTCATGGCTTCCACGCCGCGCGGCCCTTAACTCCGACA GGCTTCAGATCACAAGCAGTCTGCTACCATTTGACATTTGATTCATTTCTTCTCGATGCGAGCAAGCAAACCTTGA GCTCAAACATAACTTAATTTGTTGTTGTAAGGTGGTAAGGTCAATGAAGCGATTTAATGATTGTTGTGTGTAGATA GATACTTTGACACATGCGCGGGTTTGTAGGCTGCTCAATTTCTGTTGTAGATGAGAAGATTGCGCGTGTG TGCGCACGCTAATAAGTGGCACGGCTCAATGTAGGTTTGTACTACTAGTACTAGTATGTAAAAAGACTTATCAATA ATTAACCTCCGCTGGTACTATATGTTCTGTTTGACAT

**>TsMKK3-2 : contig229009**

CCGGCGAGCATCCCAGCGGCTCGCCGCCGACGCCCTCCTCAGCCGAGAGCGAATCGAGGTCCGCCCAAGCTC CAATTTTTCGTCGCGGGGAACCGAACCGTCCGCCCTTCTTCTGCTCAACTGAAGAGACGGTGGTTCTCGCTG CTTGGTACGTAGGGTCTCTGACAGCCTCCTGTGAACCACCAGAGCGTACCCTTGCGCCGGGTGGTACCAGCGA GTCCCC**ATG**TCGGGGCTAGAGGAGTTGAAGAAGAAGCTGCAGCCCTTGTGTTTCGACGACACGGACAAGGGCGGCT CAGTACCCGGGTTCCCTTCCCGGAGGACACATGCGATTCCTATGTGGTGTCTGATGGTGGAAACGATAAATTTACTGA GTAGATCGTTTGGTGTAGTATAACATCAATGAGCATGGCTTTCATAAGCGAAGCACCCGACCAGAAGAGCCAGATAGC GGTGAGAAGGCATACCGATGTGCCCTGTAAGACATGCACATATTTGGTCCATTGGGAATGGAGCAAGCAGTGTGCT GCAGAGAGCTATTTTCATACAGTTTCATCGAATTTCTGGCCTTGAAGAAGATAAACATATTTGAGAAGGAGAAAAGGC AACAAATCTTAATGAGATGAGAACATTTATGTGAAGCAAGTTGCTATCCTGGTTTAGTTGAATTCAGGGTGCATTT TACATGCCGTGATTCTGGACAAATAAGCATTTGCCCTTGAATACATGGATGGTGGCTCTTTAGCAGACGTTATAAGAGT CAAGAAATCAATACCAGAGCCAGTTCTTGCACACATGCTACTGAAAGTATTACTTGGCTGAAGTACTTGCATGAAG TAAGACATCTAGTGCATAGAGATCTAAAGCCAGCGAATATACTGGTAAACCTCAAGGAGAGGCAAAAATTCAGAC TTTGGTGAAGTGTGTTTGGACAATAACAATGGCTATGTGTGCTACCTTTGTAGGCACTGTGACATATATGTCACC

TGAGAGAATTCGTAATGAGAACTACTCTTATGCTGCTGATATCTGGAGTCTTGGACTAACGATATTGGAGTGTGCTA  
CTGGTAAATTTCCATATAATGTCAATGAAGGCCAGCCAATCTCATGCTGCAGATACTCGATGATCCATCACCAGCA  
CCACCAGCAGATGGCTATACACCAGAATTTTGTTCCTTCATAAATGATTGCTTGAGGAAAGATGCTGATGCAAGGCC  
TACATGCGAGCAGCTTTTGTACACGCATTTATCAAGAGGTATGAGCAAACCTGGTGTGGACTTGGCAGCATATGTCA  
GGGATGTTGTTAATCCAACAGAGAGATTAAGCAAATAGCAGAGATGCTTGCTGTTCAATTATACCTCCTGTTAAT  
GGCTCTGAAGGACCTTGGAAATTATGAAGACATTTCTACAAGGAGGAATCATCTTTCAGTTTTTCAGGGAATGTGTA  
TGTCGGGCAAAGTGCCATATTTGATACTTTGTGCAATATAAGAAAGAAGTTAAAAGGTGATCGGCCTAgagaaaaa  
ttgttcatgttgttgagaagctacattgcccgcgcgaaaTGGGGAAACAGAAATTGCTATCCGTGTGtTGGATCATT  
CATCACGGGCAACCAATTCCTGATATTTGGTGAAGGTTGCAAGCTGAAGGGATGCCAGCTTGGAGGAAATGATA  
TTGACATTCCAAGCAAGCGGGTTGGCCAGTTCGGGAGCAGTTTACCCTGCATCCAGGGACTTCCATGGGATGCTAC  
TACATAGCAAAGCAAGATCTCTACATCGTCCAGTATGAAAACAATGTATAAAGTGAAGTATGTTCCGGTTTTGTG  
CCGTCAATGATTCAGTTCATGATGAAAGCTATGTATGTTTCCACTTCTCGCGCCCCATAACTTCGACAGGCTT  
CAGATCACAATG

**>TsmKK3-3 : contig90697**

CTCTGCTCCTTGTGTTGGCTGTAATGCTGGACTGGAGGACCTGAAGCGGAGGCTGCAGCCCATCTTCTTCGACGCCG  
ATGGCAATGTTGTGCCGCCCCCGCCGCCGACGGGACATCCGACGACTCCAGCTTCGACGACTGCGAGGTTTTGGAT  
AGTGGAACTGTCAATTTATTGAGTAGGTCCTCTGATGAATATAACATCAGTAAGCTTGGCTTCCATAAACGAACAAC  
CAGACCAGATGGGACTATGCTACAGATAAGGCATATCGATGTTCTTGTTCATGATATGCATATTTTGGATTCTGTG  
GTAATGGTGCAGAGCTTGTCCATAGAGCTATTTATGTAACAGTTCATCGAGTTTTGGCACTCAAGAAAATCAAC  
ATTTTTGACAAGGAAAGGAGACAACAGATTTCTTAATGAGATTAGAAGCTTATCAGCAGCATCTTGTATCCAGGTTT  
AGTTGAATTCAGGAGTTTTTTACACCCCGGACTTGGAGAAATATACTTTGCTCTTGAGTATATGGATGGTGGTT  
CATTAGCAGATATTATCAGGGTCAAGAAATTCATAACAGAACCAGTTCCTTTCACATATGCTACAGAAAGTGTGCTA  
GCTCTGCGCTACTTGCATGAAGTCAGGCGTTTAGTTACAGAGATATAAAGCCAGCAAATTTGCTTCTAAATCTAA  
GGGTGATACGAAAATTACAGACTTCGGTGTAACTTCTGGACTGCATGATTCAGTTACCATGTTGCTACCTTCCCTGG  
GCAGTGTACATATATGCTCCCGAGAGAATTCCGGAACGAAAATTACTCATATGCTGCTGATATCTGGAGCCTTGGGA  
CTAACAGCATGGAGTGTGCAACTGGAAGATACCCATATGATGTAAGTGGGGGTGAGGCCGACTCATGCTGCAGAT  
ATTGGAAGATCCATCGCAACACCACCACAACATATGCATTACAGAGGAGTTTTGCTCGTTCATCGATGCTTGCCTGC  
AGAAAGATGCTGATGCAAGACCAACATGTGATGAGCTTTTGTCTCATTCTTCATCAAGAAATACGAGGGACCTGGT  
GTGGACTTGGCAGAGTACAACAGAAAGTTCATGATCCAGCAGAAAGATTATCACAATAGCACATATGCTTGGTGT  
ACATTACTACCTGATCTTTGACGGTGGTGTGACCAATGGCATCAGATGAAGTCAATCTATGGACAAGATTCTACTT  
TCAGTTTCTCAGGGGAAACACATGTCGGTAAAGAGCCACATATTCGATACTTTGTCAAGAATAAGGGAAATGCTAAAA  
GGTAACAGCCGTTGCGAGAAGATTGGCCGTGTGATGGAGAAGGTTTACCCTGCACATGGGGAAGAAGGGATGAGTGT  
TCGAGTTTCTGGATCATTCTATTTGGGGAACGAGTTCCTTGTGTGCGCAGATGGGTTTTGTGCTGAAGGGATGCTAA  
GCATGGAACTCTCTCCGACATTTCTCAGCAAGCAGGAGGCCATTTCCAGGAAGATTTTTTTCATGGGAGCCAGGGACT  
GCCATGGGATGCTATGTGATATCAAGGCAAGAATTGCACATCGGCGTATCATGAAGTCAATTCGCTTCTGTCATGCA  
ATCATATACATATGATGATTTTTTGTCTTTTACTGCGGTGCATTTGCTGAACTGATCTATCATGCATGTTATCTTCC  
ATTTGATGCTGAAGAAAACAATCTTCTAGCATATCGACATCGAGGTATTTGGAATCTATTAGTTGAGGCTCAACACA  
GTCTACAATGAACGAAAACATCGATTTATTGTCTCTGCAATTCAGCATTTACGCTTGTAAAGTTGAATGACTGGG

**>TsmKK4 : contig104479**

TCTATCCACGACCACAATAACGGCGACAATCGCCGACGCCGACCGATCCGGCCGCGCGCGGAGCAGGGGAGGAGCC  
AGCCTCGCCTTTTCGGGCCGGCCAGAGCGCGCGATGCGTCCGGGCGGGCCGCCGAACCGCGCGGCGGGCTGCAGCAG  
CAGCAGCCCGCAGCGGGCCGGCGCGCGCCGGCCGATTCACGCTCCCGTCCCGCAGCGCGACTGACGTC  
GCTGGCCGTGCCGCTGCCGCTGCCCGCCCGCCGCTCCCGCGCCGTCGTCACGTCCTCGTCCGGGTGCGGGTGG  
GCGGCGCGTCTCCATGCCATGCCATGTCATGACCCCGCCCAACTCGGCCGGTCCGCGCCCGCCCGCCCGCCG  
CCGCTGGGCGAGCTGGAGCGCTGCGGCGGTGGGAGGCGCCGCGGGACGGTGTGGCTGGTGGCGCACGCGCCAC  
GGGCGCGCCTACGCGTGAAGGTGCTGTACGGGCACCACGACGAGGCGGTGCGGCGGAGATCACGCGGAGATCG  
CCATCTGCGCACCGCGGAGCACCGTCCATCGTGGCTGCCACGGCATGTACGAGCAGGCGGCGGAGCTGCAGATC  
CTGCTCGAGTACATGGACGCGGGTCCCTGGACGGCGCGCATCGCGTCCGAGGCTTCTCGCCGACGTAGCGCG  
GCAGGTGCTGTGGGGATCGCGTACCTCCACCGGCGCCACATCGTGCACCGGACATCAAGCCGTCCAACCTGCTCA  
TCGACTCGGGCGCGCTGAAGATCGCCGACTTCGGGGTGGGGCGGATCCGAAACCAGACCATGGACCCCTGCAACTCC  
TCCGTGGGCACCATCGCGTACATGAGCCCGAGCGCATCAACACGGACCTCAACGACGGCAACTACAACGGTACGCG  
CGGCGACATCTGGAGCTTCGGCTTCAGCATCTCGAGTTCCTACCTGGGCGCTTCCCGTGGGGGAGAACCTGGGGA  
AGCAGGGCGACTGGGCGGCGCTCATGTGCCCATCTGCTACTCCGAGTCCGCGGCGCCCGCCCGCCACGGCTCCCCG  
GAGCTGCGGAGCTTCATCAGTGTGCTCCAGAAGAACCCGGCGAAGCGGCGTCCGGCGGCGAGCTGCTGCAGCA  
CCGTTTCATCGCTCGCCCGCAGCAGCAGCAGCCGAGGTCCTCGCCGCCCGCGCTGCTGACGGCCCGCCCGCC

GTAACCAAGTTAAATTCGGACGGATCATGGACGGACGGACGGACGGACGGACGGACGGTGGCCGGGGCGAGACGCG  
GGATCTAGGGGGAGGAGGGGCGATCTGTCTTCTTAGCCATTTTGGGAAGTGAAGCCACCACAAATTTACCCATC  
CATCCCTCGGAGTCTTGTGTGTGTGTCGCCCCGAAATTAAGCTCAAGCTTTTTCTTTAGTTTCCGTTAATGTCAA  
TTAAATGTTCTCCCCCAATGATGATGATTCTGATTCTGATTCTGATGAT

**>TsmKK5 : contig141775**

TCTATCCACGACCACAATACGGCGACAATCGCCGACGCCGACCGATCCGGCCGCGCGCGGAGCAGGGGAGGAGCC  
AGCCTCGCCTTTCGGGGCCGGCCAGAGCGCGCG**ATG**CGTCCGGGCGGGCCGCCGAACGCGCGGGCCGGCTGCAGCAG  
CAGCAGCCGGCACGCCGGGGCCGGGCGGGCCGGCCGGATCTCACGCTCCCGTCCCGCAGCGGACCTGACGTC  
GCTGGCCGTGCGCTGCGCTGCCCCCGCCCCGTCCTCCGCGCGTCTCCACGTCCTCGTCCGGGTGGGGTTCGG  
GCGGCGCGTCTCCATGCCATGCCATGTCCATGACCCCGCCAACTCGGCCGGCTCCGCGCGCCCCCGCCCGCG  
CCGCTGGGGCAGCTGGAGCGCGTGCGGCGGTGGGAGGCGCCGGCGGGACGGTGTGGCTGGTGGCGACGCGCCAC  
GGGCGCGCTACGCGTGAAGGTGCTGTACGGGCACCACGACGAGGCGGTGCGGCGGAGATCACGCGGAGATCG  
CCATCCTGCGCACCGGGAGCACCCGTCCTCGTGCCTGCCACGGCATGTACGAGCAGGCGGGCAGCTGCAGATC  
CTGCTCGAGTACATGGACGGCGGGTCCCTGGACGGCGGGCGCATCGCGTCCGAGGCTTCCGCGCAGCTAGCGCG  
GCAGGTGCTGTGGGGATCGCGTACCTCCACGGCGCCACATCGTGCACCGGACATCAAGCCGTCCAACCTGCTCA  
TCGACTCGGGCGCGTGAAGATCGCCGACTTCGGGGTGGGGCGGATCCTGAACCAGACCATGGACCCCTGCAACTCC  
TCCGTCGGCACCATCGCTACATGAGCCCCGAGCGCATCAACACCGACATCAACGACGGCGCTACGACGGCTACGC  
CGCGACATCTGGAGCTTCGGCTCAGCATCCTCGAGTCTACTCTCGGAGGTTCCCTTCGGCGGAGAACCTCGGCC  
GGCAGGGCGACTGGGGCGCGCTCATGGTCCGCATCTGCTACTCGGACCCGCGGAGCCGCTCGCCCGCACCGCTCG  
CCAGAGTTCGGGGCTTACATCGCTGCTGCCTGCAGAAAGACCCGGCCAAACCGCTTCCGCGCGCAGCTGCTGCA  
GCACCCCTTCGTCGCGTTGCCCGAGCCGAGCCGCTCGCCGCCCGCGCTCA**TGA**CCGCGCGACCTCCAATACGG  
ATCTCGATCCACTTCTTGACACCACCGACTCTCAAATCT

**>TsmKK5 : contig154845**

CCACCCCCACGGAAGCC**ATG**CGTCCGGCCGGGGCAGCCTCCCGGCCAGCCGGGCACGCCGGGCGCCCGCGCCG  
CCGCCCGGATCTCACCTCCCGATGCCCGAGCGCCGGACGTCTCCTCTCCCTCGCCGTCCCGCTCCCCCTCCCGC  
CCCCGACCGCCCGCCCCCTCCCGGGGCGGGCCCGCCAGCCGCTGCGGGCCCCGCCCGCCCCGCTCCACGAGCTG  
GAGCGCGTGGCGCGTGGGAGGCGGGCGGGACGGTGTGGTGGTGGTGGCACGGCCACGGGCGCGCCTACGC  
GCTGAAGGTGCTGTACGGGCACCACGAGGCGGTGCGGGCGGAGATCACGCGGAGATCGCCATCCTGCGCACCG  
CGGAGCACCCGTCATCGTGCCTGCCACGGCATGTACGAGCAGGCGGGCAGCTGCAGATCCTGCTCGAGTACATG  
GACGGCGGGTCCCTGGACGGCGCGCATCGCGTCCGAGGCCCTTCCGCGGACGTAGCGCGGCGAGGTGCTGTGGG  
GATCGCGTACCTCCACCGCGCCACATCGTGCACCGCGACATCAAGCCGTCCAACCTGCTCATCGACTCGGGGCGCG  
TGAAGATCGCCGACTTCGGGGTGGGGCGGATCCTGAACCAGACCATGGACCCCTGCAACTCTCCCTCGGCACCATC  
GCCATACATGAGCCCGGCGCATCAACACCGACATCAACGAGCGCCCTACGACGGCTACGCGGCGACATCTGGAG  
CTTCGGCCTCAGCATCCTCGAGTCTACCTCGGCGAGTTCCCTTCGGCGGAGAACCTCGGCCGGCAGGGCGACTGGG  
CCGGCTCATGGTCCGATCTGCTACTCGGACCCGCGCGAGCCGTCGCGCGCACCGCCTCGCCAGAGTTCCGGGG  
TTCATCGCCTGCTGCCTGCAGAAAGACCCGGCAAAGCGCCTTCCGCGCGCAGCTGCTGCAGCACCCCTGTGCGCTT  
GCCCGAGCCGACCGCTCGCCCGCCCGCGTCA**TGA**CCGCGGACCTCCAACACGGATCTCGATCCACTTC  
TTGCACCACCGCTTCCAATCCAGCATATCTGGTGGAGGGAGGATCGATGAAACTGAGCTGCCGGGGAATCTT  
GGAAGTTCTCCCGACCATTTCCGGGATTTCTTCTCGTCCACCATCGTCTCATCAAATCATCCATCCATTGTTGTCG  
CTGCTGCTGCTCCAGTTAAGGTTCCTTTCTCCTCTCCTGTGAATCTGTGATGTTGCTTACTTCTGTTACGG  
CCTTGTAAATAGTAGCAAAAGCTGTGTGCACAAAAGGATTTTGTACCGCAAGATTGGTGAATATAGACACGATATC  
CATTCTGCCATTGCCCTCCACTGCTGCAAGGAAATTTACATCTGTACATGTAGCTCATACATGATGATGAGCGGTC  
CCCATCTTGCCAGGGGATCTTCCATTTATTTATCTATGTTTGCTTATATACTAGTTGCAAGTCGCGGTGGCTCG  
ATGGAATTTATGGATTGGATGATTCTATATTTGCTGGTTGGATAGAGGGGAATCTCGGAATAGGAATCGGACAGCT  
TTGTTTGTGTTCTTTCTTTCAAGTGTGATAAGTGTATGAGGGAAAGGTGTTCTGAACTCCTCTGCCTTTCTGT  
TTTCAATCTGGTTGCTTTCTTCTCGTCCGGCCAAAGATGATTTTGTGTTTGGCTATTGGCATGCACATCATGGGT  
TTCAATTCATGTTTACTTTTGTTC

**>TsmKK6 : contig212597**

CCTCCTCCGCTAGCCGCCACGTCCCCGGCAACCCGACACCCTCGCCGTGCGCGGACCGCATCTCCTCCGCTA  
ACCCCGACCTCCAGATCCGCGCGTACCCTAGCCCTCCCTCCGCGCGCGCGCGGGAACTTTCTGCGGAGCTCGA  
TCCATCCAGTGGCCGGCTACAGCGACCCCGCGCGGATCGATCCAGCGAGCAACCGTCTGCTAGCCGTCACCT  
CTCCAGTCAACCAAGTCGCACCACGTGCCACCATTTTGACCAGCTCCGCGCTGCTATTTTTCTCCCTAAATCTCT  
CCCCACGCGGACGGCGCCCCAGCCGCTCCTCCCCGTCCGCGCGCTCCGCTCCGCGTCCATCTCCGCGCGGAGA  
AACCTTAGCCAGAGGAAGGAGCAC**ATG**AGGGGGAAGAAGCCGCTCAAGGAGTCACTCTCCGTCCGCGCGCA

GGAGACGCCCGTCGATAAGTTCTGACGGCGAGCGGTACGTTCAAGGACGGTGAAGTGCAGCTTAATCAAAGAGGTT  
TGCAGCTTATCTCCGAGGAAAACGGAGATGAACATCAATCAACAAAAATGAAGGTGGAAGATGTGCAGTTATCAATG  
GATGACCTCGAGATGATTCAGGTCATTGGTAAGGGAGTGGTGGTGTGTCCAACTAGTGCAGCACAAGTGGGTGGG  
CACATTTTATGCCTTGAAGGGCATTCAAATGAACATTCAAGGATCAGTTTCGAAACAAATAGTACAGGAGCTCAAAA  
TAAATCAAGCAACACAGAGCCACATATAGTCCTTTGCCATCAATCTTTTACCACAATGGTGAATATATCTTGT  
CTGGAATATATGGATCGTGGATCTCTTGCAGACATAATTAACAAGTTAAAACCATTCTGGAGCCATACCTCGCAGT  
ACTTTGCAAGCAGGTTTTGGAGGGACTGTTATATCTTCATCATGAAAGGCATGTGATTCACAGAGACATAAAGCCTT  
CTAACTTGTAGTCAACCATAAAGGTGAAGTAAAGATTACTGATTTTGGGGTGGTGCAGTCTAGCAAGTTCCGATT  
GGTCAGCGTGATACATTTGTTGGAACCTACAACATATATGGCGCTGAGCGGATTAGTGGCAGCTCCTATGACTACAA  
GAGTGATGTATGGAGTTTGGGCTTGGTAATACTTGAATGCGCCATTGGTCGCTTCCCTTATACTCCTCCAGAGGGAG  
AAGGTTGGTTAAGCTTCTATGAACTATTAGAAGCAATTGTTGACCAGCCACCACCTTCTGCACCTGCAGATCAGTTC  
TCTCCAGAAATCTGCTCATTTATCTCTTCTGCATACAAAAGGACCCTGCCGAGCGGAAGTCTGCTTCAGAACTCTT  
GAACCACGCCCTTCATCAAGAAGTTTGGAGACAAGGACCTAGACCTCCTGGATCCTGGTGGAGAGCCTCGAGCAGCCCA  
TGAACGTGCCCGAGTGAAGTCCGTCGCTCGCTTGTAGAGGCAAGGCTTTGTGGCAGAGTTTCTTTTCAGGGCTGGGCTG  
CCCTCCTGACGGCAATTGTGTATTGCTGTGAACCTGATGATGAGTGACCAGCCCCACCCCTGTATGTGATGATGT  
TATGTTGGAAAATCCAGAGGATTGCAATGGATTTATTAATGTATGGTAATGGATAAGAAGGCCCTTTTGTTCGCT  
GTCCTGTTATGAATGAATGGATCTGCTGTGGCTAGTTGCTTGTAGTGCATGAGAATGCAAGGAACCGTGATGCATCG  
TGCAGCGTCGTGGCGGTCCGGTTTATGTGGTTTGTACTTGGAGTGCAACCTTGGTGTGCCCTGGGAATGACCTT  
ATGTTTTTGTAGTGATATACCCTGACTGCTG

**>TsmKK10 : contig129481 (partial)**

CGGAGTTCACCTCACCCACCCACCTCACCCACCTCTCCCGCCAACTCCCATCTCATGGCTTCGTCGGCAGCGC  
CGCCAGCTACCCACCTCACCTCCTCCGCTCGACcACTtCGCCcTCGCGCGCCCGCcGCCGCcGCCcCccGCCGTGCG  
GCCGTGCGAGGGCctcGCCcgcTCTCCGACTACGAGaGGATCTCCAGCTCGGCCAGGGCAACGGCGGCACCCtCT  
tCAAGGCGCGCACCCGCGCACCGCGCAGCAggTCGCGCTCAAGCTCTTCGCCcCGGGGgACGGGGAtCCcTCCGCG  
GCCCGCGAGGCCGAGATACTCATGCTCGCCTCGGGCGCGCCGACGTCTGCGCCTCCACGCCGTcATCCCGTCGCC  
CGCGCGGAGCAGCCGGcGgCGCTGGCGCTcgAGCTCGTgTCGGGGGGCTCCCTCGCGGGCTCCTCCGCGCGaTGG  
gCCGGCCcATGGGGGAGCGCCCATCGCCGcCGTGGCGCGGAGGCGCTGCTGGGgCTCGCGgCCCTGCACGCGCTC  
CGCGTCTGCACCGCGACCTCAAGCCcGCgAACCTGCTGgTCGGcgCGGgCGGcGAGGTGAAGATCgCCGATTtCGG  
CGCCGGCAAGGTCCtTGCGG
