# Supplementary material for: Analysis of MAPK and MAPKK gene families in wheat and related Triticeae species
Source: PubMed Central journal article supplement (PMC5838963; doi:10.1186/s12864-018-4545-9), 2018-03-05
Supplement: 12864_2018_4545_MOESM7_ESM.pdf [file 12864_2018_4545_MOESM7_ESM.pdf]

**Additional File 7. Alignment and domain analysis of Triticeae MPKs.** The amino acid sequences from multiple genomic copies, along with the accessions reported in Additional File 3, of all Triticeae MPKs identified were aligned in Clustal Omega ([www.ebi.ac.uk/Tools/msa/clustalo/](http://www.ebi.ac.uk/Tools/msa/clustalo/)) under default settings. A lower case 'p' next to the gene name indicates that only a partial sequence was identified for the given gene. The PK domain is in black font, and the 'MAP kinase' signature (specific to MPKs) is bolded where 'MAP kinase' flanks (F and C) are in red font; N- and C-terminal extensions in teal font. Missing sequence information, namely 'X' residues, are shown in pink font. Highlighted sequences are the ATP binding signature (blue), the catalytic C-loop (red), the activation T-loop (black), CD domain (teal) and EF-hand CBP (pink). Sequence deviations from the T(E/D)Y activation loop of plant MPKs are marked in yellow font. Previously reported [1] conserved MPK domains are written in blue font above the alignment, including the conserved clade-specific docking domain found at the C-terminal end of the PK signature (highlighted grey; deviations from proposed sequence in a darker shade). Deviations from these sequences are highlighted in yellow; some of these deviations were observed in the ATP binding signature and are highlighted in a bright blue. Additional conserved sequences described as putative phosphorylation sites distinct from the T-loop [1] are marked with a box. An asterix indicates a stop codon.

**Reference:**

1. Mohanta TK, Arora PK, Mohanta N, Parida P, Bae H. Identification of new members of the MAPK gene family in plants shows diverse conserved domains and novel activation loop variants. *BMC Genomics*. 2015;16:1-

MPK3

|                |                                      | IGxGxYGxV | IKKIxxxF                   | DAxRxLRE | FxDIYxxxELM |                     |                |                   |
|----------------|--------------------------------------|-----------|----------------------------|----------|-------------|---------------------|----------------|-------------------|
| TuMPK3         | MDGAPVAEFRPTMTHGGRFLLYNI FGNQFEITAKY | QPPIMP    | IGRGAYGIVCSVMNFETREMVAIKKI | IANA     | F           | DNNMDAKRTLREIKLLRHL | DHENIVGLRDVIPP | PAIPQSFNDVYIATELM |
| HvMPK3 (4H)    | MDGAPVAEFRPTMTHGGRFLLYNI FGNQFEITAKY | QPPIMP    | IGRGAYGIVCSVMNFETREMVAIKKI | IANA     | F           | DNNMDAKRTLREIKLLKHL | DHENIVGLRDVIPP | PAIPQSFNDVYIATELM |
| Locus_5782     | MDGAPVAEFRPTMTHGGRFLLYNI FGNQFEITAKY | QPPIMP    | IGRGAYGIVCSVMNFETREMVAIKKI | IANA     | F           | DNNMDAKRTLREIKLLKHL | DHENIVGLRDVIPP | PAIPQSFNDVYIATELM |
| AetMPK3        | MDGAPVAEFRPTMTHGGRFLLYNI FGNQFEITAKP | QPPIMP    | IGRGAYGIVCSVMNFETREMVAIKKI | IANA     | F           | DNNMDAKRTLREIKLLRHL | DHENIVGLRDVIPP | PAIPQSFNDVYIATELM |
| AAC28850       | MDGAPVAEFRPTMTHGGRFLLYNI FGNQFEITAKY | QPPIMP    | IGRGAYGIVCSVMNFETREMVASKKI | IANA     | F           | DNNMDAKRTLREIKLLRHL | DHENIVGLRDVIPP | PAIPQSFNDVYIATELM |
| TaMPK3 (4AS)   | MDGAPVAEFRPTMTHGGRFLLYNI FGNQFEITAKY | QPPIMP    | IGRGAYGIVCSVMNFETREMVAIKKI | IANA     | F           | DNNMDAKRTLREIKLLRHL | DHENIVGLRDVIPP | PAIPQSFNDVYIATELM |
| TaMPK3 (4BL)   | MDGAPVAEFRPTMTHGGRFLLYNI FGNQFEITAKY | QPPIMP    | IGRGAYGIVCSVMNFETREMVAIKKI | IANA     | F           | DNNMDAKRTLREIKLLRHL | DHENIVGLRDVIPP | PAIPQSFNDVYIATELM |
| ScMPK3         | MDGAPVAEFRPTMTHGGRFLLYNI FGNQFEITAKY | QPPIMP    | IGRGAYGIVCSVMNFETREMVAIKKI | IANA     | F           | DNNMDAKRTLREIKLLRHL | DHENIVGLRDVIPP | PAIPQSFNDVYIATELM |
| TsMPK3 (R/A/B) | MDGAPVAEFRPTMTHGGRFLLYNI FGNQFEITAKY | QPPIMP    | IGRGAYGIVCSVMNFETREMVAIKKI | IANA     | F           | DNNMDAKRTLREIKLLRHL | DHENIVGLRDVIPP | PAIPQSFNDVYIATELM |
| TaMPK3 (4DL)   | MDGAPVAEFRPTMTHGGRFLLYNI FGNQFEITAKY | QPPIMP    | IGRGAYGIVCSVMNFETREMVAIKKI | IANA     | F           | DNNMDAKRTLREIKLLRHL | DHENIVGLRDVIPP | ATPQSFNDVYIATELM  |

\*\*\*\*\*

|                | DLxxVI  | QxLRxLKYxH                     | HRDLKPxN LxNxNCxLKIxDFGLAR | TRWYRAPEL | IDxWS <sup>v</sup> GC |           |               |      |                            |
|----------------|---------|--------------------------------|----------------------------|-----------|-----------------------|-----------|---------------|------|----------------------------|
| TuMPK3         | DTDLHHI | IRSNQELSEEHCQYFLYQLLRGLKYIHSAN | VIHRDLKPSNLLL              | NANCDLKI  | CDFGLARPSS            | ESDMMTEYV | VTRWYRAPELLLN | STDY | SAAIDVWSVGCIFMEL-----PGR   |
| HvMPK3 (4H)    | DTDLHHI | IRSNQELSEEHCQYFLYQLLRGLKYIHSAN | VIHRDLKPSNLLL              | NANCDLKI  | CDFGLARPSS            | ESDMMTEYV | VTRWYRAPELLLN | STDY | SAAIDVWSVGCIFMELINRAPLFPGR |
| Locus_5782     | DTDLHHI | IRSNQELSEEHCQYFLYQLLRGLKYIHSAN | VIHRDLKPSNLLL              | NANCDLKI  | CDFGLARPSS            | ESDMMTEYV | VTRWYRAPELLLN | STDY | SAAIDVWSVGCIFMELINRAPLFPGR |
| AetMPK3        | DTDLHHI | IRSNQELSEEHCQYFLYQLLRGLKYIHSAN | VIHRDLKPSNLLL              | NANCDLKI  | CDFGLARPSS            | ESDMMTEYV | VTRWYRAPELLLN | STDY | SAAIDVWSVGCIFMELINRAPLFPGR |
| AAC28850       | DTDLHHI | IRSNQELSEEHCQYFLYQLLRGLKYIHSAN | VIHRDLKPSNLLL              | NANCDLKI  | CDFGLARPSS            | ESDMMTEYV | VTRWYRAPELLLN | STDY | SAAIDVWSVGCIFMELINRAPLFPGR |
| TaMPK3 (4AS)   | DTDLHHI | IRSNQELSEEHCQYFLYQLLRGLKYIHSAN | VIHRDLKPSNLLL              | NANCDLKI  | CDFGLARPSS            | ESDMMTEYV | VTRWYRAPELLLN | STDY | SAAIDVWSVGCIFMELINRAPLFPGR |
| TaMPK3 (4BL)   | DTDLHHI | IRSNQELSEEHCQYFLYQLLRGLKYIHSAN | VIHRDLKPSNLLL              | NANCDLKI  | CDFGLARPSS            | ESDMMTEYV | VTRWYRAPELLLN | STDY | SAAIDVWSVGCIFMELINRAPLFPGR |
| ScMPK3         | DTDLHHI | IRSNQELSEEHCQYFLYQLLRGLKYIHSAN | VIHRDLKPSNLLL              | NANCDLKI  | CDFGLARPSS            | ESDMMTEYV | VTRWYRAPELLLN | STDY | SAAIDVWSVGCIFMELINRAPLFPGR |
| TsMPK3 (R/A/B) | DTDLHHI | IRSNQELSEEHCQYFLYQLLRGLKYIHSAN | VIHRDLKPSNLLL              | NANCDLKI  | CDFGLARPSS            | ESDMMTEYV | VTRWYRAPELLLN | STDY | SAAIDVWSVGCIFMELINRAPLFPGR |
| TaMPK3 (4DL)   | DTDLHHI | IRSNQELSEEHCQYFLYQLLRGLKYIHSAN | VIHRDLKPSNLLL              | NANCDLKI  | CDFGLARPSS            | ESDMMTEYV | VTRWYRAPELLLN | STDY | SAAIDVWSVGCIFMELINRAPLFPGR |

\*\*\*\*\*

|                |                                                                                      | KMLTFDP <sup>K</sup> <sub>R</sub> RITVE <sup>D</sup> <sub>AL</sub> |
|----------------|--------------------------------------------------------------------------------------|--------------------------------------------------------------------|
| TuMPK3         | DHMHQMRLLITEVIGTPTDDDLGFIRNEDARRYMRHLPQFPRRSFPGQFPKVQPAALDLIERMLTFNPLQRITVEEAEHPYLER | LHDVADEP ICTDPFSDFEQHPLTEDQMKQLIFNEALELNPFRY*                      |
| HvMPK3 (4H)    | DHMHQMRLLITEVIGTPTDDDLGFIRNEDARRYMRHLPQFPRRSFPGQFPKVQPAALDLIERMLTFNPLQRITVEEAEHPYLER | LHDVADEP ICTDPFSDFEQHPLTEDQMKQLIFNEALELNPFRY*                      |
| Locus_5782     | DHMHQMRLLITEVIGTPTDDDLGFIRNEDARRYMRHLPQFPRRSFPGQFPKVQPAALDLIERMLTFNPLQRITVEEAEHPYLER | LHDVADEP ICTDPFSDFEQHPLTEDQMKQLIFNEALELNPFRY*                      |
| AetMPK3        | DHMHQMRLLITEVIGTPTDDDLGFIRNEDARRYMRHLPQFPRRSFPGQFPKVQPAALDLIERMLTFNPLQRITVEEAEHPYLER | LHDVADEP ICTDPFSDFEQHPLTEDQMKQLIFNEALELNPFRY*                      |
| AAC28850       | DHMHQMRLLITEVIGTPTDDDLGFIRNEDARRYMRHLPQFPRRSFPGQFPKVQPAALDLIERMLTFNPLQRITVEEAEHPYLER | LHDVADEP ICTDPFSDFEQHPLTEDQMKQLIFNEALELNPFRY*                      |
| TaMPK3 (4AS)   | DHMHQMRLLITEVIGTPTDDDLGFIRNEDARRYMRHLPQFPRRSFPGQFPKVQPAALDLIERMLTFNPLQRITVEEAEHPYLER | LHDVADEP ICTDPFSDFEQHPLTEDQMKQLIFNEALELNPFRY*                      |
| TaMPK3 (4BL)   | DHMHQMRLLITEVIGTPTDDDLGFIRNEDARRYMRHLPQFPRRSFPGQFPKVQPAALDLIERMLTFNPLQRITVEEAEHPYLER | LHDVADEP ICTDPFSDFEQHPLTEDQMKQLIFNEALELNPFRY*                      |
| ScMPK3         | DHMHQMRLLITEVIGTPTDDDLGFIRNEDARRYMRHLPQFPRRSFPGQFPKVQPAALDLIERMLTFNPLQRITVEEAEHPYLER | LHDVADEP ICTDPFSDFEQHPLTEDQMKQLIFNEALELNPFRY*                      |
| TsMPK3 (R/A/B) | DHMHQMRLLITEVIGTPTDDDLGFIRNEDARRYMRHLPQFPRRSFPGQFPKVQPAALDLIERMLTFNPLQRITVEEAEHPYLER | LHDVADEP ICTDPFSDFEQHPLTEDQMKQLIFNEALELNPFRY*                      |
| TaMPK3 (4DL)   | DHMHQMRLLITEVIGTPTDDDLGFIRNEDARRYMRHLPQFPRRSFPGQFPKVQPAALDLIERMLTFNPLQRITVEEAEHPYLER | LHDVADEP ICTDPFSDFEQHPLTEDQMKQLIFNEALELNPFRY*                      |

\*\*\*\*\*

MPK4

|              |                                                |                          |                                                |                 |            |
|--------------|------------------------------------------------|--------------------------|------------------------------------------------|-----------------|------------|
|              |                                                | <b>IGxGxYGxV</b>         | <b>IKKIxxxF</b>                                | <b>DAxRxLRE</b> | <b>FxD</b> |
| ScMPK4       | MDTSGGGGGAAGGAAQIQGMATHGGRYVLYNVYGNLFEVASKYAPP | IRGAYGIVCAAVSSDTGEEVAIKK | IGNAFDNHIDAKRTLREIKLLRHMDHENILA                | IKDLIRPPRRDDFKD |            |
| HvMPK4 (1H)  | MDTSGGGGGAAGGAAQIQGMATHGGRYVLYNVYGNLFEVASKYAPP | IRGAYGIVCAAVSSDTGEEVAIKK | IGNAFDNHIDAKRTLREIKLLRHMDHENILAMKDLIRPPRRDDFKD |                 |            |
| BAJ97968.1   | MDTSGGGGGAAGGAAQIQGMATHGGRYVLYNVYGNLFEVASKYAPP | IRGAYGIVCAAVSSDTGEEVAIKK | IGNAFDNHIDAKRTLREIKLLRHMDHENILAMKDLIRPPRRDDFKD |                 |            |
| TaMPK4 (1AL) | MDTSGGGGGAAGGAAQIQGMATHGGRYVLYNVYGNLFEVASKYAPP | IRGAYGIVCAAVSSDTGEEVAIKK | IGNAFDNHIDAKRTLREIKLLRHMDHENILA                | IKDLIRPPRRDDFKD |            |
| TsMPK4 (R/A) | MDTSGGGGGAAGGAAQIQGMATHGGRYVLYNVYGNLFEVASKYAPP | IRGAYGIVCAAVSSDTGEEVAIKK | IGNAFDNHIDAKRTLREIKLLRHMDHENILA                | IKDLIRPPRRDDFKD |            |
| AetMPK4      | MDN-SGGAATAGGAAQIQGMATHGGRYVLYNVYGNLFEVASKYAPP | IRGAYGIVCAAVSSDTGEEVAIKK | IGNAFDNHIDAKRTLREIKLLRHMDHENILA                | IKDLIRPPRRDDFKD |            |
| TaMPK4 (1BL) | MDT-SGGGTAAGGAAQIQGMATHGGRYVLYNVYGNLFEVASKYAPP | IRGAYGIVCAAVSSDTGEEVAIKK | IGNAFDNHIDAKRTLREIKLLRHMDHENILA                | IKDLIRPPRRDDFKD |            |
| TaMPK4 (1DL) | MDT-SGGGAAAGGAAQIQGMATHGGRYVLYNVYGNLFEVASKYAPP | IRGAYGIVCAAVSSDTGEEVAIKK | IGNAFDNHIDAKRTLREIKLLRHMDHENILA                | IKDLIRPPRRDDFKD |            |
|              | ** . . ** . :*****                             |                          |                                                |                 |            |

|              |                 |                                |                   |                      |                          |                    |                            |
|--------------|-----------------|--------------------------------|-------------------|----------------------|--------------------------|--------------------|----------------------------|
|              | <b>IYxxxELM</b> | <b>DLxxVI</b>                  | <b>QxLRxLKYxH</b> | <b>HRDLKPxN</b>      | <b>LxNxNCxLKIxDFGLAR</b> | <b>TRWYRAPEL</b>   | <b>IDxWS<sup>v</sup>GC</b> |
| ScMPK4       | VYIVTELMDTDLHQI | IRSNQSLTDDHCQYFLYQLLRGLKIVHSAN | VLHRDLKPSNLFNAN   | CDLKIADFGLARTTSETDLM | TEYVVTRWYRAPELLLNCSQY    | TAAIDVWSVGCILGEIIT |                            |
| HvMPK4 (1H)  | VYIVTELMDTDLHQI | IRSNQSLTDDHCQYFLYQLLRGLKIVHSAN | VLHRDLKPSNLFNAN   | CDLKIADFGLARTTSETDLM | TEYVVTRWYRAPELLLNCSQY    | TAAIDVWSVGCILGEIIT |                            |
| BAJ97968.1   | VYIVTELMDTDLHQI | IRSNQSLTDDHCQYFLYQLLRGLKIVHSAN | VLHRDLKPSNLFNAN   | CDLKIADFGLARTTSETDLM | TEYVVTRWYRAPELLLNCSQY    | TAAIDVWSVGCILGEIIT |                            |
| TaMPK4 (1AL) | VYIVTELMDTDLHQI | IRSNQSLTDDHCQYFLYQLLRGLKIVHSAN | VLHRDLKPSNLFNAN   | CDLKIADFGLARTTSETDLM | TEYVVTRWYRAPELLLNCSQY    | TAAIDVWSVGCILGEIIT |                            |
| TsMPK4 (R/A) | VYIVTELMDTDLHQI | IRSNQSLTDDHCQYFLYQLLRGLKIVHSAN | VLHRDLKPSNLFNAN   | CDLKIADFGLARTTSETDLM | TEYVVTRWYRAPELLLNCSQY    | TAAIDVWSVGCILGEIIT |                            |
| AetMPK4      | VYIVTELMDTDLHQI | IRSNQSLTDDHCQYFLYQLLRGLKIVHSAN | VLHRDLKPSNLFNAN   | CDLKIADFGLARTTSETDLM | TEYVVTRWYRAPELLLNCSQY    | TAAIDVWSVGCILGEIIT |                            |
| TaMPK4 (1BL) | VYIVTELMDTDLHQI | IRSNQSLTDDHCQYFLYQLLRGLKIVHSAN | VLHRDLKPSNLFNAN   | CDLKIADFGLARTTSETDLM | TEYVVTRWYRAPELLLNCSQY    | TAAIDVWSVGCILGEIIT |                            |
| TaMPK4 (1DL) | VYIVTELMDTDLHQI | IRSNQSLTDDHCQYFLYQLLRGLKIVHSAN | VLHRDLKPSNLFNAN   | CDLKIADFGLARTTSETDLM | TEYVVTRWYRAPELLLNCSQY    | TAAIDVWSVGCILGEIIT |                            |
|              | *****           |                                |                   |                      |                          |                    |                            |

|              |                                                                                              |                                               |
|--------------|----------------------------------------------------------------------------------------------|-----------------------------------------------|
|              |                                                                                              | <b>KML<sup>v</sup>FDPxKRIIVDEAL</b>           |
| ScMPK4       | RQPLFPGRDYIQQLKLITELIGSPDDSSLGFLRSDNARRYMKQLPQYPRQDFRLRFRNMSDGAVDLLERMLVFDPSRRITVDEALHHPYLAS | LHDINEEPTCPAPFSDFEQPSFTEEHMKELIWRETLAFNPDPPI* |
| HvMPK4 (1H)  | RQPLFPGRDYIQQLKLITELIGSPDDSSLGFLRSDNARRYMKQLPQYPRQDFRLRFRNMSDGAVDLLERMLVFDPSRRITVDEALHHPYLAS | LHDINEEPTCPAPFSDFEQPSFTEEHMKELIWRETLAFNPDPPI* |
| BAJ97968.1   | RQPLFPGRDYIQQLKLITELIGSPDDSSLGFLRSDNARRYMKQLPQYPRQDFRLRFRNMSDGAVDLLERMLVFDPSRRITVDEALHHPYLAS | LHDINEEPTCPAPFSDFEQPSFTEEHMKELIWRETLAFNPDPPI* |
| TaMPK4 (1AL) | RQPLFPGRDYIQQLKLITELIGSPDDSSLGFLRSDNARRYMKQLPQYPRQDFRLRFRNMSDGAVDLLERMLVFDPSRRITVDEALHHPYLAS | LHDINEEPTCPAPFSDFEQPSFTEEHMKELIWRETLAFNPDPPI* |
| TsMPK4 (R/A) | RQPLFPGRDYIQQLKLITELIGSPDDSSLGFLRSDNARRYMKQLPQYPRQDFRLRFRNMSDGAVDLLERMLVFDPSRRITVDEALHHPYLAS | LHDINEEPTCPAPFSDFEQPSFTEEHMKELIWRETLAFNPDPPI* |
| AetMPK4      | RQPLFPGRDYIQQLKLITELIGSPDDSSLGFLRSDNARRYMKQLPQYPRQDFRLRFRNMSDGAVDLLERMLVFDPSRRITVDEALHHPYLAS | LHDINEEPTCPAPFSDFEQPSFTEEHMKELIWRETLAFNPDPPI* |
| TaMPK4 (1BL) | RQPLFPGRDYIQQLKLITELIGSPDDSSLGFLRSDNARRYMKQLPQYPRQDFRLRFRNMSDGAVDLLERMLVFDPSRRITVDEALHHPYLAS | LHDINEEPTCPAPFSDFEQPSFTEEHMKELIWRETLAFNPDPPI* |
| TaMPK4 (1DL) | RQPLFPGRDYIQQLKLITELIGSPDDSSLGFLRSDNARRYMKQLPQYPRQDFRLRFRNMSDGAVDLLERMLVFDPSRRITVDEALHHPYLAS | LHDINEEPTCPAPFSDFEQPSFTEEHMKELIWRETLAFNPDPPI* |
|              | *****                                                                                        |                                               |

**MPK6**

|              |                         |       |                                |           |          |                               |                               |                               |
|--------------|-------------------------|-------|--------------------------------|-----------|----------|-------------------------------|-------------------------------|-------------------------------|
|              |                         |       |                                |           |          | <b>IGxGxYGxV</b>              | <b>IKKIxxxF</b>               | <b>DAxRxLRE</b>               |
| AAO16560.1   | MDAGGAQPPDSEMAEAGAGAA   | ---   | AAAGTAPGGAMDNIQATLTHGGRFIQYNI  | FGNVFEVTA | KYKPPILP | IGKGAYGIVCSALNSETGEQVAIKKIANA | <b>F</b> DNKIDAKRTLREIKLLRHMD |                               |
| TaMPK6 (7DS) | MDAGGAQPPDSEMAEAGAGA    | ---   | AAAAGTAPGGAMDNIQATLTHGGRFIQYNI | FGNVFEVTA | KYKPPILP | IGKGAYGIVCSALNSETGEQVAIKKIANA | <b>F</b> DNKIDAKRTLREIKLLRHMD |                               |
| AK333212.1   | MDAGGAQPPDSEMAEAGAGA    | ---   | AAAAGTAPGGAMDNIQATLTHGGRFIQYNI | FGNVFEVTA | KYKPPILP | IGKGAYGIVCSALNSETGEQVAIKKIANA | <b>F</b> DNKIDAKRTLREIKLLRHMD |                               |
| RFL3769      | MDAGGAQPPDSEMAEAGAGA    | ---   | AAAAGTAPGGAMDNIQATLTHGGRFIQYNI | FGNVFEVTA | KYKPPILP | IGKGAYGIVCSALNSETGEQVAIKKIANA | <b>F</b> DNKIDAKRTLREIKLLRHMD |                               |
| AetMPK6p     | -----                   |       |                                |           |          | -----                         | SALNSETGEQVAIKKIANA           | <b>F</b> DNKIDAKRTLREIKLLRHMD |
| ScMPK6       | -----                   |       | MENIQATLTHGGRFIQYNI            | FGNVFEVTA | KYKPPILP | IGKGAYGIVCSALNSETGEQVAIKKIANA | <b>F</b> DNKIDAKRTLREIKLLRHMD |                               |
| TsMPK6 (R)   | -----                   |       | MENIQATLTHGGRFIQYNI            | FGNVFEVTA | KYKPPILP | IGKGAYGIVCSALNSETGEQVAIKKIANA | <b>F</b> DNKIDAKRTLREIKLLRHMD |                               |
| BAJ90351.1   | MDAGGAQPPDAEMA EAGGAAAA | --    | AAAAGAPGGAMENIQATLSHGGRFIQYNI  | FGNVFEVTA | KYKPPILP | IGKGAYGIVCSALNSETGEQVAIKKIANA | <b>F</b> DNKIDAKRTLREIKLLRHMD |                               |
| BAJ86277.1   | MDAGGAQPPDAEMA EAGGAAAA | --    | AAAAGAPGGAMENIQATLSHGGRFIQYNI  | FGNVFEVTA | KYKPPILP | IGKGAYGIVCSALNSETGEQVAIKKIANA | <b>F</b> DNKIDAKRTLREIKLLRHMD |                               |
| BAK07440.1   | MDAGGAQPPDAEMA EAGGAAAA | --    | AAAAGAPGGAMENIQATLSHGGRFIQYNI  | FGNVFEVTA | KYKPPILP | IGKGAYGIVCSALNSETGEQVAIKKIANA | <b>F</b> DNKIDAKRTLREIKLLRHMD |                               |
| TaMPK6 (7BS) | MDAGGAQPPDAEMA EAGGAAA  | ---   | AAAAGSAPGGAMDNIQATLTHGGRFIQYNI | FGNIFEVTA | KYKPPILP | IGKGAYGIVCSALNSETGEQVAIKKIANA | <b>F</b> DNKIDAKRTLREIKLLRHMD |                               |
| TaMPK6 (7AS) | MDAGGAQPPDSEMAEAGAAAA   | ----- | AAAAGAPGGAMDNIQATLTHGGRFIQYNI  | FGNVFEVTA | KYKPPILP | IGKGAYGIVCSALNSETGEQVAIKKIANA | <b>F</b> DNKIDAKRTLREIKLLRHMD |                               |
| HvMPK6 (7H)p | -----                   |       |                                |           |          | -----                         |                               |                               |

|              |                       |                    |                                |               |                         |                   |                          |                  |
|--------------|-----------------------|--------------------|--------------------------------|---------------|-------------------------|-------------------|--------------------------|------------------|
|              |                       | <b>FxDIYxxxELM</b> | <b>DLxxVI</b>                  |               | <b>QxLRxLKYxH</b>       | <b>HRDLKPxN</b>   | <b>LxNxNCxLKIxDFGLAR</b> | <b>TRWYRAPEL</b> |
| AAO16560.1   | HENIVAIRDIIPPAQRTAFND | VYIAYELMDTDLHQI    | IRSNQALSEEHCQYFLYQILRGLKYIHSAN | VLHRDLKPSNLLL | NANCDLKICDFGLARTTSETDFM | TEYVVTRWYRAPELLNS |                          |                  |
| TaMPK6 (7DS) | HENIVAIRDIIPPAQRTAFND | VYIAYELMDTDLHQI    | IRSNQALSEEHCQYFLYQILRGLKYIHSAN | VLHRDLKPSNLLL | NANCDLKICDFGLARTTSETDFM | TEYVVTRWYRAPELLNS |                          |                  |
| AK333212.1   | HENIVAIRDIIPPAQRTAFND | VYIAYELMDTDLHQI    | IRSNQALSEEHCQYFLYQILRGLKYIHSAN | VLHRDLKPSNLLL | NANCDLKICDFGLARTTSETDFM | TEYVVTRWYRAPELLNS |                          |                  |
| RFL3769      | HENIVAIRDIIPPAQRTAFND | VYIAYELMDTDLHQI    | IRSNQALSEEHCQYFLYQILRGLKYIHSAN | VLHRDLKPSNLLL | NANCDLKICDFGLARTTSETDFM | TEYVVTRWYRAPELLNS |                          |                  |
| AetMPK6p     | HENIVAIRDIIPPAQRTAFND | VYIAYELMDTDLHQI    | IRSNQALSEEHCQYFLYQILRGLKYIHSAN | VLHRDLKPSNLLL | NANCDLKICDFGLARTTSETDFM | TEYVVTRWYRAPELLNS |                          |                  |
| ScMPK6       | HENIVAIRDIIPPAQRTAFND | VYIAYELMDTDLHQI    | IRSNQALSEEHCQYFLYQILRGLKYIHSAN | VLHRDLKPSNLLL | NANCDLKICDFGLARTTSETDFM | TEYVVTRWYRAPELLNS |                          |                  |
| TsMPK6 (R)   | HENIVAIRDIIPPAQRTAFND | VYIAYELMDTDLHQI    | IRSNQALSEEHCQYFLYQILRGLKYIHSAN | VLHRDLKPSNLLL | NANCDLKICDFGLARTTSETDFM | TEYVVTRWYRAPELLNS |                          |                  |
| BAJ90351.1   | HENIVAIRDIIPPAQRTAFND | VYIAYELMDTDLHQI    | IRSNQALSEEHCQYFLYQILRGLKYIHSAN | VLHRDLKPSNLLL | NANCDLKICDFGLARTTSETDFM | TEYVVTRWYRAPELLNS |                          |                  |
| BAJ86277.1   | HENIVAIRDIIPPAQRTAFND | VYIAYELMDTDLHQI    | IRSNQALSEEHCQYFLYQILRGLKYIHSAN | VLHRDLKPSNLLL | NANCDLKICDFGLARTTSETDFM | TEYVVTRWYRAPELLNS |                          |                  |
| BAK07440.1   | HENIVAIRDIIPPAQRTAFND | VYIAYELMDTDLHQI    | IRSNQALSEEHCQYFLYQILRGLKYIHSAN | VLHRDLKPSNLLL | NANCDLKICDFGLARTTSETDFM | TEYVVTRWYRAPELLNS |                          |                  |
| TaMPK6 (7BS) | HENIVAIRDIIPPAQRTAFND | VYIAYELMDTDLHQI    | IRSNQALSEEHCQYFLYQILRGLKYIHSAN | VLHRDLKPSNLLL | NANCDLKICDFGLARTTSETDFM | TEYVVTRWYRAPELLNS |                          |                  |
| TaMPK6 (7AS) | HENIVAIRDIIPPAQRTAFND | VYIAYELMDTDLHQI    | IRSNQALSEEHCQYFLYQILRGLKYIHSAN | VLHRDLKPSNLLL | NANCDLKICDFGLARTTSETDFM | TEYVVTRWYRAPELLNS |                          |                  |
| HvMPK6 (7H)p | -----                 |                    | QYFLYQILRGLKYIHSAN             | VLHRDLKPSNLLL | NANCDLKICDFGLARTTSETDFM | TEYVVTRWYRAPELLNS |                          |                  |
|              |                       |                    |                                |               |                         |                   |                          |                  |

MPK6 continued

|              | IDxWS <sup>v</sup> <sub>i</sub> GC                                                                                      | KMLTFDP <sup>K</sup> <sub>R</sub> Q <sup>O</sup> KRITVE <sup>D</sup> <sub>B</sub> AL |
|--------------|-------------------------------------------------------------------------------------------------------------------------|--------------------------------------------------------------------------------------|
| AAO16560.1   | SEYTAADVWSVGCIFMELMDRKPLFPGRDHVHQLRLLMEVFPCGISSLQLIGTPNEADLDFVFNENARRYIRQLPRHARQSLSEKFPVHPSAIDLVEKMLTFDPRQRITVEGALAHPYL |                                                                                      |
| TaMPK6 (7DS) | SEYTAADVWSVGCIFMELMDRKPLFPGRDHVHQLRLLME-----LIGTPNEADLDFVFNENARRYIRQLPRHARQSLSEKFPVHPSAIDLVEKMLTFDPRQRITVEGALAHPYL      |                                                                                      |
| AK333212.1   | SEYTAADVWSVGCIFMELMDRKPLFPGRDHVHQLRLLME-----LIGTPNEADLDFVFNENARRYIRQLPRHARQSLSEKFPVHPSAIDLVEKMLTFDPRQRITVEGALAHPYL      |                                                                                      |
| RFL3769      | SEYTAADVWSVGCIFMELMDRKPLFPGRDHVHQLRLLME-----LIGTPNEADLDFVFNENARRYIRQLPRHARQSLSEKFPVHPSAIDLVEKMLTFDPRQRITVEGALAHPYL      |                                                                                      |
| AetMPK6p     | SEYTAADVWSVGCIFMELMDRKPLFPGRDHVHQLRLLME-----LIGTPNEADLDFVFNENARRYIRQLPRHARQSLSEKFPVHPSAIDLVEKMLTFDPRQRITVEGALAHPYL      |                                                                                      |
| ScMPK6       | SEYTAADVWSVGCIFMELMDRKPLFPGRDHVHQLRLLME-----LIGTPNEADLDFVFNENARRYIRQLPRHARQSLSEKFPVHPSAIDLVEKMLTFDPRQRITVEGALAHPYL      |                                                                                      |
| TsMPK6 (R)   | SEYTAADVWSVGCIFMELMDRKPLFPGRDHVHQLRLLME-----LIGTPNEADLDFVFNENARRYIRQLPRHARQSLSEKFPVHPSAIDLVEKMLTFDPRQRITVEGALAHPYL      |                                                                                      |
| BAJ90351.1   | SEYTAADVWSVGCIFMELMDRKPLFPGRDHVHQLRLLME-----LIGTPNEADLDFVFNENARRYIRQLPRHARQSLSEKFPVHPSAIDLVEKMLTFDPRQRITVEGALAHPYL      |                                                                                      |
| BAJ86277.1   | SEYTAADVWSVGCIFMELMDRKPLFPGRDHVHQLRLLME-----LIGTPNEADLDFVFNENARRYIRQLPRHARQSLSEKFPVHPSAIDLVEKMLTFDPRQRITVEGALAHPYL      |                                                                                      |
| BAK07440.1   | SEYTAADVWSVGCIFMELMDRKPLFPGRDHVHQLRLLME-----LIGTPNEADLDFVFNENARRYIRQLPRHARQSLSEKFPVHPSAIDLVEKMLTFDPRQRITVEGALAHPYL      |                                                                                      |
| TaMPK6 (7BS) | SEYTAADVWSVGCIFMELMDRKPLFPGRDHVHQLRLLME-----LIGTPNEADLDFVFNENARRYIRQLPRHARQSLSEKFPVHPSAIDLVEKMLTFDPRQRITVEGALAHPYL      |                                                                                      |
| TaMPK6 (7AS) | SEYTAADVWSVGCIFMELMDRKPLFPGRDHVHQLRLLME-----LIGTPNEADLDFVFNENARRYIRQLPRHARQSLSEKFPVHPSAIDLVEKMLTFDPRQRITVEGALAHPYL      |                                                                                      |
| HvMPK6 (7H)p | SEYTAADVWSVGCIFMELMDRKPLFPGRDHVHQLRLLME-----LIGTPNEADLDFVFNENARRYIRQLPRHARQSLSEKFPVHPSAIDLVEKMLTFDPRQRITVEGALAHPYL      |                                                                                      |
|              | *****                                                                                                                   | *****                                                                                |

|              |              |                                    |
|--------------|--------------|------------------------------------|
| AAO16560.1   | ASLHDISDEPVC | TMPFSDFEQHALSEEQMKDLIHQEGITFNPDYQ* |
| TaMPK6 (7DS) | ASLHDISDEPVC | TMPFSDFEQHALSEEQMKDLIHQEGITFNPDYQ* |
| AK333212.1   | ASLHDISDEPVC | TMPFSDFEQHALSEEQMKDLIHQEGITFNPDYQ* |
| RFL3769      | ASLHDISDEPVC | TMPFSDFEQHALSEEQMKDLIHQEGITFNPDYQ* |
| AetMPK6p     | ASLHDISDEPVC | TMPFSDFEQHALSEEQMKDLIHQEGITFNPDYQ* |
| ScMPK6       | ASLHDISDEPVC | TMPFSDFEQHALSEEQMKDLIHQEGIAFNPDYQ* |
| TsMPK6 (R)   | ASLHDISDEPVC | TMPFSDFEQHALSEEQMKDLIHQEGIAFNPDYQ* |
| BAJ90351.1   | ASLHDISDEPVC | TMPFSDFEQHALSEEQMKDLIHQEGIAFNPDYQ* |
| BAJ86277.1   | ASLHDISDEPVC | TMPFSDFEQHALSEEQMKDLIHQEGIAFNPDYQ* |
| BAK07440.1   | ASLHDISDEPVC | TMPFSDFEQHALSEEQMKDLIHQEGIAFNPDYQ* |
| TaMPK6 (7BS) | ASLHDISDEPVC | TMPFSDFEQHALSEEQMKDLIHQEGIAFNPDYQ* |
| TaMPK6 (7AS) | ASLHDISDEPVC | TMPFSDFEQHALSEEQMKDLIHQEGIAFNPDYQ* |
| HvMPK6 (7H)p | ASLHDISDEPVC | TMPFSDFEQHALSEEQMKDLIHQEGIAFNPDYQ* |
|              | *****        | :*****                             |

MPK7

|                |                                       | IGxGxYGxV | IKKIxxxF | DAxRxLRE | FxDIYxxxELM | DL |
|----------------|---------------------------------------|-----------|----------|----------|-------------|----|
| TaMPK7 (7DLc2) | MAMMVDPPNGMGNHGKHYITMWQTMFEIDTKYVPIKP | I         | I        | I        | I           | I  |
| TuMPK7         | MAMMVDPPNGMGNHGKHYITMWQTMFEIDTKYVPIKP | I         | I        | I        | I           | I  |
| TsMPK7 (B)     | MAMMVDPPNGMGNHGKHYITMWQTMFEIDTKYVPIKP | I         | I        | I        | I           | I  |
| TaMPK7 (7BL)   | MAMMVDPPNGMGNHGKHYITMWQTMFEIDTKYVPIKP | I         | I        | I        | I           | I  |
| AET10457.1     | MAMMVDPPNGMGNHGKHYITMWQTMFEIDTKYVPIKP | I         | I        | I        | I           | I  |
| tplb0018e09    | MAMMVDPPNGMGNHGKHYITMWQTMFEIDTKYVPIKP | I         | I        | I        | I           | I  |
| HvMPK7 (7H)    | MAMMVDPPNGMGNHGKHYITMWQTMFEIDTKYVPIKP | I         | I        | I        | I           | I  |
| AK252980.1     | MAMMVDPPNGMGNHGKHYITMWQTMFEIDTKYVPIKP | I         | I        | I        | I           | I  |
| AetMPK7        | MAMMVDPPNGMGNHGKHYITMWQTMFEIDTKYVPIKP | I         | I        | I        | I           | I  |
| TaMPK7 (7DLc1) | MAMMVDPPNGMGNHGKHYITMWQTMFEIDTKYVPIKP | I         | I        | I        | I           | I  |
| TaMPK7 (7AL)   | MAMMVDPPNGMGNHGKHYITMWQTMFEIDTKYVPIKP | I         | I        | I        | I           | I  |
| AET10456.1     | MAMMVDPPNGMGNHGKHYITMWQTMFEIDTKYVPIKP | I         | I        | I        | I           | I  |
| ScMPK7         | MAMMVDPPNGMGNHGKHYITMWQTMFEIDTKYVPIKP | I         | I        | I        | I           | I  |

\*\*\*\*\*:\*\*\*\*\*.\*\*\*\*\*\*

|                | xxVI                              | QxLRxLKYxH | HRDLKPxN | LxNxNCxLKIxDFGLAR | TRWYRAPEL | IDxWS <sup>v</sup> GC |
|----------------|-----------------------------------|------------|----------|-------------------|-----------|-----------------------|
| TaMPK7 (7DLc2) | HQIVKSSQPLSNDHCQYFLFQVLRGLKYLHSAG | I          | I        | I                 | I         | I                     |
| TuMPK7         | HQIVKSSQPLSNDHCQYFLFQVLRGLKYLHSAG | I          | I        | I                 | I         | I                     |
| TsMPK7 (B)     | HQIVKSSQPLSNDHCQYFLFQVLRGLKYLH-AG | I          | I        | I                 | I         | I                     |
| TaMPK7 (7BL)   | HQIVKSSQPLSNDHCQYFLFQVLRGLKYLHSAG | I          | I        | I                 | I         | I                     |
| AET10457.1     | HQIVKSSQPLSNDHCQYFLFQVLRGLKYLHSAG | I          | I        | I                 | I         | I                     |
| tplb0018e09    | HQIVKSSQPLSNDHCQYFLFQVLRGLKYLHSAG | I          | I        | I                 | I         | I                     |
| HvMPK7 (7H)    | HQIVKSSQPLSNDHCQYFLFQVLRGLKYLHSAG | I          | I        | I                 | I         | I                     |
| AK252980.1     | HQIVKSSQPLSNDHCQYFLFQVLRGLKYLHSAG | I          | I        | I                 | I         | I                     |
| AetMPK7        | HQIVKSSQPLSNDHCQYFLFQVLRGLKYLHSAG | I          | I        | I                 | I         | I                     |
| TaMPK7 (7DLc1) | HQIVKSSQPLSNDHCQYFLFQVLRGLKYLHSAG | I          | I        | I                 | I         | I                     |
| TaMPK7 (7AL)   | HQIVKSSQPLSNDHCQYFLFQVLRGLKYLHSAG | I          | I        | I                 | I         | I                     |
| AET10456.1     | HQIVKSSQPLSNDHCQYFLFQVLRGLKYLHSAG | I          | I        | I                 | I         | I                     |
| ScMPK7         | HQIVKSSQPLSNDHCQYFLFQVLRGLKYLHSAG | I          | I        | I                 | I         | I                     |

\*\*\*\*\*:\*\*\*\*\*.\*\*\*\*\*\*

MPK7 continued

KMLIFDP<sup>s</sup> KRISVTEAL

TaMPK7 (7DLc2) NQLKLIVNVLGTMKADLAFIDNPKAGNYIKSLPYTPGMPLSIMYPHAHPLAIDLLQKMLVFDPSKRISVTQALEHPYMSPLYDPSANPPAQVPIDLDIDENIGTDMIREMLWQEMQLQYHPGAARMVNM\*-  
TuMPK7 NQLKLIVNVLGTMSEADLAFIDNPKARNYIKSLPYTPGIPLSSMYPQAHPLAIDLLQKMLVFDPSKRISVTQALEHPYMSPLYDPSANPPAQVPIDLDIDENIGTDMIREMLWQEMQLQYHPQAARGVMNM\*  
TsMPK7 (B) NQLKLIVNVLGTMSETDLAFIDNPKARNYIKSLPYTPGMPLSIMYPHAHPLAIDLLQKMLVFDPSKRISVTQALEHPYMSPLYDPSANPPAQVPIDLDIDENIGTDMIREMLWQEMQLQYHPEAARMVNM\*-  
TaMPK7 (7BL) NQLKLIVNVLGTMSETDLAFIDNPKARNYIKSLPYTPGMPLSIMYPHAHPLAIDLLQKMLVFDPSKRISVTQALEHPYMSPLYDPSANPPAQVPIDLDIDENIGTDMIREMLWQEMQLQYHPEAARMVNM\*-  
AET10457.1 NQLKLIVNVLGTMSETDLAFIDNPKARNYIKSLPYTPGMPLSIMYPHAHPLAIDLLQKMLVFDPSKRISVTQALEHPYMSPLYDPSANPPAQVPIDLDIDENIGTDMIREMLWQEMQLQYHPEAARMVNM\*-  
tp1b0018e09 NQLKLIVNVLGTMSETDLAFIDNPKARNYIKSLPYTPGMPLSIMYPHAHPLAIDLLQKMLVFDPSKRISVTQALEHPYMSPLYDPSANPPAQVPIDLDIDENIGTDMIREMLWQEMQLQYHPEAARMVNM\*-  
HvMPK7 (7H) NQLKLIVNVLGTMSEADLAFIDNSKARKYIKSLPYTPGIPLSSMYPQAHPLAIDLLQKMLVFDPSKRISVTQALEHPYMSPLYDPSANPPAQVPIDLDIDENIGTDMIREMLWQEMQLQYHPEAARMVNM\*-  
AK252980.1 NQLKLIVNVLGTMSEADLAFIDNSKARKYIKSLPYTPGIPLSSMYPQAHPLAIDLLQKMLVFDPSKRISVTQALEHPYMSPLYDPSANPPAQVPIDLDIDENIGTDMIREMLWQEMQLQYHPEAARMVNM\*-  
AetMPK7 NQLKLIVNVLGTMSEADLAFIDNPKARNYIKSLPYTPGMPLSSMYPRAHPLAIDLLQKMLVFDPSKRISVTQALEHPYMSPLYDPSANPPAQVPIDLDIDENIGTDMIREMLWQEMQLQYHPEAARMVNM\*-  
TaMPK7 (7DLc1) NQLKLIVNVLGTMSEADLAFIDNPKARNYIKSLPYTPGMPLSSMYPRAHPLAIDLLQKMLVFDPSKRISVTQALEHPYMSPLYDPSANPPAQVPIDLDIDENIGTDMIREMLWQEMQLQYHPEAARMVNM\*-  
TaMPK7 (7AL) NQLKLIVNVLGTMSEADLAFIDNPKARNYIKSLPYTPGIPLSSMYPQAHPLAIDLLQKMLVFDPSKRISVTQALEHPYMSPLYDPSANPPAQVPIDLDIDENIGTDMIREMLWQEMQLQYHPEAARMVNM\*-  
AET10456.1 NQLKLIVNVLGTMSEADLAFIDNPKARNYIKSLPYTPGIPLSSMYPQAHPLAIDLLQKMLVFDPSKRISVTQALEHPYMSPLYDPSANPPAQVPIDLDIDENIGTDMIREMLWQEMQLQYHPEAARMVNM\*-  
ScMPK7 NQLKLIVNVLGTMSEADLAFIDNPKARNYIKSLPYTPGMPLSTMYPQAHPLAIDLLQKMLVFDPSKRISVTQALEHPYMSPLYDPSANPPAQVPIDLDIDENIGTDMIREMLWQEMQLQYHPEAARMVNM\*-  
\*\*\*\*\*: :\*\*\*\*\* \*\* :\*\*\*\*\*:\*\*\* \*\*\*:\*\*\*\*\*

MPK11

|                |                                                                |          |                |      |      |                  |         |                    |                 |  |
|----------------|----------------------------------------------------------------|----------|----------------|------|------|------------------|---------|--------------------|-----------------|--|
|                |                                                                |          |                |      |      | <b>IGxGxYGxV</b> |         | <b>IKKIxxxF</b>    | <b>DAxRxLRE</b> |  |
| HvMPK11 (7H)   | MRMEGGVGAGGGGGGGHGGGHGLGGEAQIKGTLTHGGRYVQYNVYGNLFEVSAKYVPPIRP  | VGRGACGI | ICAAVNAHTREEVA | IKKI | IGNA | <b>FDNQ</b>      | IDAKRTL | REVKLLRHMNHENVISIK |                 |  |
| BAJ95789.1     | MRMEGGVGAGGGGGGGHGGGHGLGGEAQIKGTLTHGGRYVQYNVYGNLFEVSAKYVPPIRP  | VGRGACGI | ICAAVNAQTREEVA | IKKI | IGNA | <b>FDNQ</b>      | IDAKRTL | REVKLLRHMNHENVISIK |                 |  |
| ScMPK11        | MRMEGGGAWA--GGGGGHGGGHGLGGEAQIKGTLTHGGRYVQYNVYGNLFEVSAKYVPPIRP | VGRGACGI | ICAAVNAQTREEVA | IKKI | IGNA | <b>FDNQ</b>      | IDAKRTL | REVKLLRHMNHENVISIK |                 |  |
| TsMPK11 (U)    | MRMEGGGAGA--GGGGGHGGGHGLGGEAQIKGTLTHGGRYVQYNVYGNLFEVSAKYVPPIRP | VGRGACGI | ICAAVNAQTREEVA | IKKI | IGNA | <b>FDNQ</b>      | IDAKRTL | REVKLLRHMNHENVISIK |                 |  |
| TsMPK11 (A)    | MRMEGGGAGA--GGGGGHGGGHGLGGEAQIKGTLTHGGRYVQYNVYGNLFEVSAKYVPPIRP | VGRGACGI | ICAAVNAQTREEVA | IKKI | IGNA | <b>FDNQ</b>      | IDAKRTL | REVKLLRHMNHENVISIK |                 |  |
| TaMPK11 (7BL)  | MRMEGGGAGA---GGG-----GLGGEAQIKGTLTHGGRYVQYNVYGNLFEVSAKYVPPIRP  | VGRGACGI | ICAAVNAQTREEVA | IKKI | IGNA | <b>FDNQ</b>      | IDAKRTL | REVKLLRHMNHENVISIK |                 |  |
| JV870088.1     | MRMEGGGAGA---GGG-----GLGGEAQIKGTLTHGGRYVQYNVYGNLFEVSAKYVPPIRP  | VGRGACGI | ICAAVNAQTREEVA | IKKI | IGNA | <b>FDNQ</b>      | IDAKRTL | REVKLLRHMNHENVISIK |                 |  |
| TaMPK11 (7DL)  | MRMEGGGAGA---GGGGHGGGHGLGGEAQIKGTLTHGGRYVQYNVYGNLFEVSAKYVPPIRP | VGRGACGI | ICAAVNAQTREEVA | IKKI | IGNA | <b>FDNQ</b>      | IDAKRTL | REVKLLRHMNHENVISIK |                 |  |
| TaMPK11 (7AL)  | MRMEGGGAGA---GGGGHGGGHGLGGEAQIKGTLTHGGRYVQYNVYGNLFEVSAKYVPPIRP | VGRGACGI | ICAAVNAQTREEVA | IKKI | IGNA | <b>FDNQ</b>      | IDAKRTL | REVKLLRHMNHENVISIK |                 |  |
| HAAB01041577.1 | MRMEGGGAGA---GGGGHGGGHGLGGEAQIKGTLTHGGRYVQYNVYGNLFEVSAKYVPPIRP | VGRGACGI | ICAAVNAQTREEVA | IKKI | IGNA | <b>FDNQ</b>      | IDAKRTL | REVKLLRHMNHENVISIK |                 |  |
| TuMPK11        | MRMEGGGAGA---GGGGHGGGHGLGGEAQIKGTLTHGGRYVQYNVYGNLFEVSAKYVPPIRP | VGRGACGI | ICAAVNAQTREEVA | IKKI | IGNA | <b>FDNQ</b>      | IDAKRTL | REVKLLRHMNHENVISIK |                 |  |
| AetMPK11       | MRMEGGGAGA---GGGGHGGGHGLGGEAQIKGTLTHGGRYVQYNVYGNLFEVSAKYVPPIRP | VGRGACGI | ICAAVNAQTREEVA | IKKI | IGNA | <b>FDNQ</b>      | IDAKRTL | REVKLLRHMNHENVISIK |                 |  |

\*\*\*\*\* . \* \*\*\*\* \*\*\*\*\*:\*\*\*\*\* \*\*\*\*\*

|                |             |                    |               |             |                   |                 |                          |             |                  |             |
|----------------|-------------|--------------------|---------------|-------------|-------------------|-----------------|--------------------------|-------------|------------------|-------------|
|                |             | <b>FxDIYxxxELM</b> | <b>DLxxVI</b> |             | <b>QxLRxLKYxH</b> | <b>HRDLKPxN</b> | <b>LxNxNCxLKIxDFGLAR</b> |             | <b>TRWYRAPEL</b> | <b>ID</b>   |
| HvMPK11 (7H)   | DIIRPPRENFN | DIIRPPRENFN        | DIIRPPRENFN   | DIIRPPRENFN | DIIRPPRENFN       | DIIRPPRENFN     | DIIRPPRENFN              | DIIRPPRENFN | DIIRPPRENFN      | DIIRPPRENFN |
| BAJ95789.1     | DIIRPPRENFN | DIIRPPRENFN        | DIIRPPRENFN   | DIIRPPRENFN | DIIRPPRENFN       | DIIRPPRENFN     | DIIRPPRENFN              | DIIRPPRENFN | DIIRPPRENFN      | DIIRPPRENFN |
| ScMPK11        | DIIRPPRENFN | DIIRPPRENFN        | DIIRPPRENFN   | DIIRPPRENFN | DIIRPPRENFN       | DIIRPPRENFN     | DIIRPPRENFN              | DIIRPPRENFN | DIIRPPRENFN      | DIIRPPRENFN |
| TsMPK11 (U)    | DIIRPPRENFN | DIIRPPRENFN        | DIIRPPRENFN   | DIIRPPRENFN | DIIRPPRENFN       | DIIRPPRENFN     | DIIRPPRENFN              | DIIRPPRENFN | DIIRPPRENFN      | DIIRPPRENFN |
| TsMPK11 (A)    | DIIRPPRENFN | DIIRPPRENFN        | DIIRPPRENFN   | DIIRPPRENFN | DIIRPPRENFN       | DIIRPPRENFN     | DIIRPPRENFN              | DIIRPPRENFN | DIIRPPRENFN      | DIIRPPRENFN |
| TaMPK11 (7BL)  | DIIRPTRENFN | DIIRPPRENFN        | DIIRPPRENFN   | DIIRPPRENFN | DIIRPPRENFN       | DIIRPPRENFN     | DIIRPPRENFN              | DIIRPPRENFN | DIIRPPRENFN      | DIIRPPRENFN |
| JV870088.1     | DIIRPTRENFN | DIIRPPRENFN        | DIIRPPRENFN   | DIIRPPRENFN | DIIRPPRENFN       | DIIRPPRENFN     | DIIRPPRENFN              | DIIRPPRENFN | DIIRPPRENFN      | DIIRPPRENFN |
| TaMPK11 (7DL)  | DIIRPPRENFN | DIIRPPRENFN        | DIIRPPRENFN   | DIIRPPRENFN | DIIRPPRENFN       | DIIRPPRENFN     | DIIRPPRENFN              | DIIRPPRENFN | DIIRPPRENFN      | DIIRPPRENFN |
| TaMPK11 (7AL)  | DIIRPPRENFN | DIIRPPRENFN        | DIIRPPRENFN   | DIIRPPRENFN | DIIRPPRENFN       | DIIRPPRENFN     | DIIRPPRENFN              | DIIRPPRENFN | DIIRPPRENFN      | DIIRPPRENFN |
| HAAB01041577.1 | DIIRPPRENFN | DIIRPPRENFN        | DIIRPPRENFN   | DIIRPPRENFN | DIIRPPRENFN       | DIIRPPRENFN     | DIIRPPRENFN              | DIIRPPRENFN | DIIRPPRENFN      | DIIRPPRENFN |
| TuMPK11        | DIIRPPRENFN | DIIRPPRENFN        | DIIRPPRENFN   | DIIRPPRENFN | DIIRPPRENFN       | DIIRPPRENFN     | DIIRPPRENFN              | DIIRPPRENFN | DIIRPPRENFN      | DIIRPPRENFN |
| AetMPK11       | DIIRPPRENFN | DIIRPPRENFN        | DIIRPPRENFN   | DIIRPPRENFN | DIIRPPRENFN       | DIIRPPRENFN     | DIIRPPRENFN              | DIIRPPRENFN | DIIRPPRENFN      | DIIRPPRENFN |

\*\*\*\*\* \*\*\*\*\* \*\*\*\*\* \*\*\*\*\* \*\*\*\*\*:\*\*\*\*\* \*\*\*\*\*:\*\*\*\*\* \*\*\*\*\*:\*\*\*\*\*

|                |                     |                     |                     |                     |                     |                     |                                     |                     |
|----------------|---------------------|---------------------|---------------------|---------------------|---------------------|---------------------|-------------------------------------|---------------------|
|                |                     |                     |                     |                     |                     |                     | <b>KML<sup>v</sup>FDPxKRIIVDEAL</b> |                     |
| HvMPK11 (7H)   | IWSVGCILGEIAMREPLFP | IWSVGCILGEIAMREPLFP | IWSVGCILGEIAMREPLFP | IWSVGCILGEIAMREPLFP | IWSVGCILGEIAMREPLFP | IWSVGCILGEIAMREPLFP | IWSVGCILGEIAMREPLFP                 | IWSVGCILGEIAMREPLFP |
| BAJ95789.1     | IWSVGCILGEIAMREPLFP | IWSVGCILGEIAMREPLFP | IWSVGCILGEIAMREPLFP | IWSVGCILGEIAMREPLFP | IWSVGCILGEIAMREPLFP | IWSVGCILGEIAMREPLFP | IWSVGCILGEIAMREPLFP                 | IWSVGCILGEIAMREPLFP |
| ScMPK11        | IWSVGCILGEIAMREPLFP | IWSVGCILGEIAMREPLFP | IWSVGCILGEIAMREPLFP | IWSVGCILGEIAMREPLFP | IWSVGCILGEIAMREPLFP | IWSVGCILGEIAMREPLFP | IWSVGCILGEIAMREPLFP                 | IWSVGCILGEIAMREPLFP |
| TsMPK11 (U)    | IWSVGCILGEIAMREPLFP | IWSVGCILGEIAMREPLFP | IWSVGCILGEIAMREPLFP | IWSVGCILGEIAMREPLFP | IWSVGCILGEIAMREPLFP | IWSVGCILGEIAMREPLFP | IWSVGCILGEIAMREPLFP                 | IWSVGCILGEIAMREPLFP |
| TsMPK11 (A)    | IWSVGCILGEIAMREPLFP | IWSVGCILGEIAMREPLFP | IWSVGCILGEIAMREPLFP | IWSVGCILGEIAMREPLFP | IWSVGCILGEIAMREPLFP | IWSVGCILGEIAMREPLFP | IWSVGCILGEIAMREPLFP                 | IWSVGCILGEIAMREPLFP |
| TaMPK11 (7BL)  | IWSVGCILGEIAMREPLFP | IWSVGCILGEIAMREPLFP | IWSVGCILGEIAMREPLFP | IWSVGCILGEIAMREPLFP | IWSVGCILGEIAMREPLFP | IWSVGCILGEIAMREPLFP | IWSVGCILGEIAMREPLFP                 | IWSVGCILGEIAMREPLFP |
| JV870088.1     | IWSVGCILGEIAMREPLFP | IWSVGCILGEIAMREPLFP | IWSVGCILGEIAMREPLFP | IWSVGCILGEIAMREPLFP | IWSVGCILGEIAMREPLFP | IWSVGCILGEIAMREPLFP | IWSVGCILGEIAMREPLFP                 | IWSVGCILGEIAMREPLFP |
| TaMPK11 (7DL)  | IWSVGCILGEIAMREPLFP | IWSVGCILGEIAMREPLFP | IWSVGCILGEIAMREPLFP | IWSVGCILGEIAMREPLFP | IWSVGCILGEIAMREPLFP | IWSVGCILGEIAMREPLFP | IWSVGCILGEIAMREPLFP                 | IWSVGCILGEIAMREPLFP |
| TaMPK11 (7AL)  | IWSVGCILGEIAMREPLFP | IWSVGCILGEIAMREPLFP | IWSVGCILGEIAMREPLFP | IWSVGCILGEIAMREPLFP | IWSVGCILGEIAMREPLFP | IWSVGCILGEIAMREPLFP | IWSVGCILGEIAMREPLFP                 | IWSVGCILGEIAMREPLFP |
| HAAB01041577.1 | IWSVGCILGEIAMREPLFP | IWSVGCILGEIAMREPLFP | IWSVGCILGEIAMREPLFP | IWSVGCILGEIAMREPLFP | IWSVGCILGEIAMREPLFP | IWSVGCILGEIAMREPLFP | IWSVGCILGEIAMREPLFP                 | IWSVGCILGEIAMREPLFP |
| TuMPK11        | IWSVGCILGEIAMREPLFP | IWSVGCILGEIAMREPLFP | IWSVGCILGEIAMREPLFP | IWSVGCILGEIAMREPLFP | IWSVGCILGEIAMREPLFP | IWSVGCILGEIAMREPLFP | IWSVGCILGEIAMREPLFP                 | IWSVGCILGEIAMREPLFP |
| AetMPK11       | IWSVGCILGEIAMREPLFP | IWSVGCILGEIAMREPLFP | IWSVGCILGEIAMREPLFP | IWSVGCILGEIAMREPLFP | IWSVGCILGEIAMREPLFP | IWSVGCILGEIAMREPLFP | IWSVGCILGEIAMREPLFP                 | IWSVGCILGEIAMREPLFP |

\*\*\*\*\* \*\*\*\*\* \*\*\*\*\* \*\*\*\*\* \*\*\*\*\*:\*\*\*\*\* \*\*\*\*\*:\*\*\*\*\* \*\*\*\*\*:\*\*\*\*\*

**MPK11 continued**

HvMPK11(7H) SFD FEQPSFTEEDIKELIWREALKFNPEPIH\*  
BAJ95789.1 SFD FEQPSFTEEDIKELIWREALKFNPEPIH\*  
ScMPK11 SFD FEQPSFTEEDIKELIWREALKFNPEPIH\*  
TsMPK11(U) SFD FEQPSFTEEDIKELIWREALKFNPEPIH\*  
TsMPK11(A) SFD FEQPSFTEEDIKELIWREALKFNPEPIH\*  
TaMPK11(7BL) SFD FEQPSFTEEDIKELIWREALKFNPEPIH\*  
JV870088.1 SFD FEQPSFTEEDIKELIWREALKFNPEPIH\*  
TaMPK11(7DL) SFD FEQPSFTEEDIKELIWREALKFNPEPIH\*  
TaMPK11(7AL) SFD FEQPSFTEEDIKELIWREALKFNPEPIH\*  
HAAB01041577.1 SFD FEQPSFTEEDIKELIWREALKFNPEPIH\*  
TuMPK11 SFD FEQPSFTEEDIKELIWREALKFNPEPIH\*  
AetMPK11 SFD FEQPSFTEEDIKELIWREALKFNPEPIH\*  
\*\*\*\*\*

MPK14

|               |                                      |   |                            |                 |                 |                             |                 |              |                 |            |
|---------------|--------------------------------------|---|----------------------------|-----------------|-----------------|-----------------------------|-----------------|--------------|-----------------|------------|
|               |                                      |   | <b>IGxGxYGxV</b>           | <b>IKKIxxxF</b> | <b>DaxRxLRE</b> | <b>FxDIYxxxELM</b>          |                 |              |                 |            |
| AetMPK14      | MAMLVDPNPMGNQGKHYYSMWQTLFEIDTKYVPIKP | I | IGRGAYGIVCSSINRETNEKVAIKKI | IHNV            | F               | DNRVDALRTLREL--KLLRHLRHENVI | SLKDIMPVQRRSFKD | VYLVYELMDT   |                 |            |
| TsMPK14 (R/B) | MAMLVDPNPMGNQGKHYYSMWQTLFEIDTKYVPIKP | I | IGRGAYGIVCSSINRETNEKVAIKKI | IHNV            | F               | DNRVDALRTLREL--KLLRHLRHENVI | SLKDIMPVQRRSFKD | VYLVYELMDT   |                 |            |
| TaMPK14 (6DS) | MAMLVDPNPMGNQGKHYYSMWQTLFEIDTKYVPIKP | I | IGRGAYGIVCSSINRETNEKVAIKKI | IHNV            | F               | DNRVDALRTLREL               | X               | KLLRHLRHENVI | SLKDIMPVQRRSFKD | VYLVYELMDT |
| AK332648.1    | MAMLVDPNPMGNQGKHYYSMWQTLFEIDTKYVPIKP | I | IGRGAYGIVCSSINRETNEKVAIKKI | IHNV            | F               | DNRVDALRTLREL--KLLRHLRHENVI | SLKDIMPVQRRSFKD | VYLVYELMDT   |                 |            |
| HvMPK14 (6H)  | MAMLVDPNPMGNQGKHYYSMWQTLFEIDTKYVPIKP | I | IGRGAYGIVCSSINRETNEKVAIKKI | IHNV            | F               | DNRVDALRTLREL--KLLRHLRHENVI | SLKDIMPVQRRSFKD | VYLVYELMDT   |                 |            |
| BAJ85436.1    | MAMLVDPNPMGNQGKHYYSMWQTLFEIDTKYVPIKP | I | IGRGAYGIVCSSINRETNEKVAIKKI | IHNV            | F               | DNRVDALRTLREL--KLLRHLRHENVI | SLKDIMPVQRRSFKD | VYLVYELMDT   |                 |            |
| BAJ84961.1    | MAMLVDPNPMGNQGKHYYSMWQTLFEIDTKYVPIKP | I | IGRGAYGIVCSSINRETNEKVAIKKI | IHNV            | F               | DNRVDALRTLREL--KLLRHLRHENVI | SLKDIMPVQRRSFKD | VYLVYELMDT   |                 |            |
| TaMPK14 (6AS) | MAMLVDPNPMGNQGKHYYSMWQTLFEIDTKYVPIKP | I | IGRGAYGIVCSSINRETNEKVAIKKI | IHNV            | F               | DNRVDALRTLREL--KLLRHLRHENVI | SLKDIMPVQRRSFKD | VYLVYELMDT   |                 |            |
| TaMPK14 (6BS) | MAMLVDPNPMGNQGKHYYSMWQTLFEIDTKYVPIKP | I | IGRGAYGIVCSSINRETNEKVAIKKI | IHNV            | F               | DNRVDALRTLREL--KLLRHLRHENVI | SLKDIMPVQRRSFKD | VYLVYELMDT   |                 |            |
| ScMPK14       | MAMLVDPNPMGNQGKHYYSMWQTLFEIDTKYVPIKP | I | IGRGAYGIVCSSINRETNEKVAIKKI | IHNV            | F               | DNRVDALRTLREL--KLLRHLRHENVI | SLKDIMPVQRRSFKD | VYLVYELMDT   |                 |            |
| TuMPK14       | MAMLVDPNPMGNQGKHYYSMWQTLFEIDTKYVPIKP | I | IGRGAYGIVCSSINRETNEKVAIKKI | IHNV            | F               | DNRVDALRTLREL--KLLRHLRHENVI | SLKDIMPVQRRSFKD | VYLVYELMDT   |                 |            |
|               | *****                                |   | *****                      |                 | *               | *****                       |                 | *****        |                 |            |

|               |               |                                |                                  |                  |                                       |                        |        |
|---------------|---------------|--------------------------------|----------------------------------|------------------|---------------------------------------|------------------------|--------|
|               | <b>DLxxVI</b> | <b>QxLRxLKYxH</b>              | <b>HRDLKPxN LxNxNCxLKIxDFLAR</b> | <b>TRWYRAPEL</b> | <b>IDxWS<sup>y</sup>IGC</b>           |                        |        |
| AetMPK14      | DLHQI         | IKSPQGLSNDHCQYFLFQLLRGLKYLHSAE | ILHRDLKPGNLLVNAN                 | CDLKI            | CDFGLARTNSSKGQFMTEYVVTRWYRAPELLLCCDNY | GTSIDVWSVGCIFAELLGRKPI | IFPGTE |
| TsMPK14 (R/B) | DLHQI         | IKSPQGLSNDHCQYFLFQLLRGLKYLHSAE | ILHRDLKPGNLLVNAN                 | CDLKI            | CDFGLARTNSSKGQFMTEYVVTRWYRAPELLLCCDNY | GTSIDVWSVGCIFAELLGRKPI | IFPGTE |
| TaMPK14 (6DS) | DLHQI         | IKSPQGLSNDHCQYFLFQLLRGLKYLHSAE | ILHRDLKPGNLLVNAN                 | CDLKI            | CDFGLARTNSSKGQFMTEYVVTRWYRAPELLLCCDNY | GTSIDVWSVGCIFAELLGRKPI | IFPGTE |
| AK332648.1    | DLHQI         | IKSPQGLSNDHCQYFLFQLLRGLKYLHSAE | ILHRDLKPGNLLVNAN                 | CDLKI            | CDFGLARTNSSKGQFMTEYVVTRWYRAPELLLCCDNY | GTSIDVWSVGCIFAELLGRKPI | IFPGTE |
| HvMPK14 (6H)  | DLHQI         | IKSPQGLSNDHCQYFLFQLLRGLKYLHSAE | ILHRDLKPGNLLVNAN                 | CDLKI            | CDFGLARTNSSKGQFMTEYVVTRWYRAPELLLCCDNY | GTSIDVWSVGCIFAELLGRKPI | IFPGTE |
| BAJ85436.1    | DLHQI         | IKSPQGLSNDHCQYFLFQLLRGLKYLHSAE | ILHRDLKPGNLLVNAN                 | CDLKI            | CDFGLARTNSSKGQFMTEYVVTRWYRAPELLLCCDNY | GTSIDVWSVGCIFAELLGRKPI | IFPGTE |
| BAJ84961.1    | DLHQI         | IKSPQGLSNDHCQYFLFQLLRGLKYLHSAE | ILHRDLKPGNLLVNAN                 | CDLKI            | CDFGLARTNSSKGQFMTEYVVTRWYRAPELLLCCDNY | GTSIDVWSVGCIFAELLGRKPI | IFPGTE |
| TaMPK14 (6AS) | DLHQI         | IKSPQGLSNDHCQYFLFQLLRGLKYLHSAE | ILHRDLKPGNLLVNAN                 | CDLKI            | CDFGLARTNSSKGQFMTEYVVTRWYRAPELLLCCDNY | GTSIDVWSVGCIFAELLGRKPI | IFPGTE |
| TaMPK14 (6BS) | DLHQI         | IKSPQGLSNDHCQYFLFQLLRGLKYLHSAE | ILHRDLKPGNLLVNAN                 | CDLKI            | CDFGLARTNSSKGQFMTEYVVTRWYRAPELLLCCDNY | GTSIDVWSVGCIFAELLGRKPI | IFPGTE |
| ScMPK14       | DLHQI         | IKSPQGLSNDHCQYFLFQLLRGLKYLHSAE | ILHRDLKPGNLLVNAN                 | CDLKI            | CDFGLARTNSSKGQFMTEYVVTRWYRAPELLLCCDNY | GTSIDVWSVGCIFAELLGRKPI | IFPGTE |
| TuMPK14       | DLHQI         | IKSPQGLSNDHCQYFLFQLLRGLKYLHSAE | ILHRDLKPGNLLVNAN                 | CDLKI            | CDFGLARTNSSKGQFMTEYVVTRWYRAPELLLCCDNY | GTSIDVWSVGCIFAELLGRKPI | IFPGTE |
|               | *****         |                                | *****                            | *                | *****                                 |                        | *****  |

|               |                                                                                                                                           |
|---------------|-------------------------------------------------------------------------------------------------------------------------------------------|
|               | <b>KMLIFDP<sup>s</sup>KRISVTEAL</b>                                                                                                       |
| AetMPK14      | CLNQLKLI VNVLGTMS ESDL EFDNPKARRY IIP---TLPVPLASMYPHAHPLAIDLLQKMLIFDPTKRI SVTQALEHPYMSPLYDPSANPPAQVPIDLDIDENISSEMIREMMWQEMLHYHPEAAA AVNM* |
| TsMPK14 (R/B) | CLNQLKLI VNVLGTMS ESDL EFDNPKARRY IKTLPYTPGVPLASMYPHAHPLAIDLLQKMLIFDPTKRI SVTQALEHPYMSPLYDPSANPPAQVPIDLDIDENISSEMIREMMWQEMLHYHPEAATAVNM*  |
| TaMPK14 (6DS) | CLNQLKLI VNVLGTMS ESDL EFDNPKARRY IKTLPYTPGVPLASMYPHAHPLAIDLLQKMLIFDPTKRI SVTQALEHPYMSPLYDPSANPPAQVPIDLDIDENISSEMIREMMWQEMLHYHPEAAA AVNM* |
| AK332648.1    | CLNQLKLI VNVLGTMS ESDL EFDNPKARRY IKTLPYTPGVPLASMYPHAHPLAIDLLQKMLIFDPTKRI SVTQALEHPYMSPLYDPSANPPAQVPIDLDIDENISSEMIREMMWQEMLHYHPEAAA AVNM* |
| HvMPK14 (6H)  | CLNQLKLI VNVLGTMS ESDL EFDNPKARRY IKTLPYTPGVPLASMYPHAHPLAIDLLQKMLIFDPTKRI SVTQALEHPYMSPLYDPSANPPAQVPIDLDIDENISSEMIREMMWQEMLHYHPEAAA AVNM* |
| BAJ85436.1    | CLNQLKLI VNVLGTMS ESDL EFDNPKARRY IKTLPYTPGVPLASMYPHAHPLAIDLLQKMLIFDPTKRI SVTQALEHPYMSPLYDPSANPPAQVPIDLDIDENISSEMIREMMWQEMLHYHPEAAA AVNM* |
| BAJ84961.1    | CLNQLKLI VNVLGTMS ESDL EFDNPKARRY IKTLPYTPGVPLASMYPHAHPLAIDLLQKMLIFDPTKRI SVTQALEHPYMSPLYDPSANPPAQVPIDLDIDENISSEMIREMMWQEMLHYHPEAAA AVNM* |
| TaMPK14 (6AS) | CLNQLKLI VNVLGTMS ESDL EFDNPKARRY IKTLPYTPGVPLASMYPHAHPLAIDLLQKMLIFDPTKRI SVTQALEHPYMSPLYDPSANPPAQVPIDLDIDENISSEMIREMMWQEMLHYHPEAATAVNM*  |
| TaMPK14 (6BS) | CLNQLKLI VNVLGTMS ESDL EFDNPKARRY IKTLPYTPGVPLASMYPHAHPLAIDLLQKMLIFDPTKRI SVTQALEHPYMSPLYDPSANPPAQVPIDLDIDENISSEMIREMMWQEMLHYHPEAATAVNM*  |
| ScMPK14       | CLNQLKLI VNVLGTMS ESDL EFDNPKARRY IKTLPYTPGVPLASMYPHAHPLAIDLLQKMLIFDPTKRI SVTQALEHPYMSPLYDPSANPPAQVPIDLDIDENISSEMIREMMWQEMLHYHPEAATAVNM*  |
| TuMPK14       | CLNQLKLI VNVLGTMS ESDL EFDNPKARRY IKTLPYTPGVPLASMYPHAHPLAIDLLQKMLIFDPTKRI SVTQALEHPYMSPLYDPSANPPAQVPIDLDIDENISSEMIREMMWQEMLHYHPEAATAVNM*  |
|               | ***** * ***** ; ***** ; *****                                                                                                             |



MPK16 continued

TsMPK16(U1) PTNFMYPsAVDHFkkQFTFLeeHYAKGStAAPPERQHNSLPRPSVIYSDNRPQGSdSRPQGAANITDDLsRCIIRDNAQKPRRDPAsvGANRVPKELLsQGLVKWLVrHF-----  
TsMPK16(U2) PTNFMYPsAVDHFkkQFTFLeeHYAKGStAAPPERQHNSLPRPSVIYSDNRPQGSdSRPQGAANITDDLsRCIIRDNAQKPRRDPAsvGANRVPKGAAVARPGKVVGSALRYGNCSTSGT  
AK354221.1 PTGFMYPsAVDHFkkQFTFLeeHYAKGStAAPPERQHNSLPRPSVIFSDNRPQGSdSRPQGAANITDDLsRCIIRDNTQKPRRDtASvGANRVPQGAAVARPGKVVGSALRYGNCSTSGT  
HvMPK16(1H) PTGFMYPsAVDHFkkQFTFLeeHYAKGStAAPPERQHNSLPRPSVIFSDNRPQGSdSRPQGAANITDDLsRCIIRDNTQKPRRDtASvGANRVPQGAAVARPGKVVGSALRYGNCSTSGT  
AK251500.1 PTGFMYPsAVDHFkkQFTFLeeHYAKGStAAPPERQHNSLPRPSVIFSDNRPQGSdSRPQGAANITDDLsRCIIRDNTQKPRRDtASvGANRVPQGAAVARPGKVVGSALRYGNCSTSGT  
BAJ88123.1 PTGFMYPsAVDHFkkQFTFLeeHYAKGStAAPPERQHNSLPRPSVIFSDNRPQGSdSRPQGAANITDDLsRCIIRDNTQKPRRDtASvGANRVPQGAAVARPGKVVGSALRYGNCSTSGT  
TaMPK16(1BS) PTNFMYPsAVDHFkkQFTFLeeHYAKGStAAPPERQHNSLPRPSVIYSDNRPQGSdSRPQGAANITDDLsRCIIRDNAQKPRRDPAsvGANRVPKGAAVARPGKVVGSALRYGNCSTSGT  
ABC54584.1 PTNFMYPsAVDHFkkQFTFLeeHYAKGStAAPPERQHNSLPRPSVIYSDNRPQGSdSRPQGAANITDDLsRCIIRDNAQKPRRDPAsvGANRVPKGAAVARPGKVVGSALRYGNCSTSGT  
AetMPK16 PTNFMYPsAVDHFkkQFTFLeeHYAKGStAAPPERQHNSLPRPSVIYSDNRPQGSdSRPQGAANITDDLsRCIIRDNTQKPRRDPAsvGANRVPQGAAVARPGKVVGSALRYGNCSTPGT  
TaMPK16(U) PTNFMYPsAVDHFkkQFTFLeeHYAKGStAAPPERQHNSLPRPSVIYSDNRPQGSdSRPQGAANITDDLsRCIIRDNTQKPRRDPAsvGANRVPQGAAVARPGKVVGSALRYGNCSTPGT  
TuMPK16 PTNFMYPsAVDHFkkQFTFLeeHYAKGStAAPPERQHNSLPRPSVIYSDNRPQGSdSRPQGAANITDDLsRCIIRDNAQKPRRDPAsvGANRVPQGAAVARPGKVVGSALRYGNCSTSGT  
TaMPK16(1AS) PTNFMYPsAVDHFkkQFTFLeeHYAKGStAAPPERQHNSLPRPSVIYSDNRPQGSdSRPQGAANITDDLsRCIIRDNAQKPRRDPAsvGANRVPQGAAVARPGKVVGSALRYGNCSTSGT  
\*\* .\*\*\*\*\*:\*\*\*\*\* \*\*\*\*\*:\*\*\*\*\* \*\*\*\*\*: \* : :

TsMPK16(U1) -----VMVTVQHLVPSNMNSEGSSQAKELFQTVFLRAAHT---LEEITPARAKQVKL----KGST----  
TsMPK16(U2) EQYEQRrvITSQGIVPNGVPSGSSYPrrNNTCKSETGEaERIDVSQAVPPKPYtGNKLPATVDGRNGHW\*  
AK354221.1 EQYEQRrvITGQGFIPNGVPSGSSYPrrNNTCKSETGEaERIDVSQAGPPKPYtGNKLPATVDGRNGHW\*  
HvMPK16(1H) EQYEQRrvITGQGFIVPNGVPSGSSYPrrNNTCKSETGEaERIDVSQAGPPKPYtGNKLPATVDGRNGHW\*  
AK251500.1 EQYEQRrvITGQGFIVPNGVPSGSSYPrrNNTCKSETGEaERIDVSQAGPPKPYtGNKLPATVDGRNGHW\*  
BAJ88123.1 EQYEQRrvITGQGFIVPNGVPSGSSYPrrNNTCKSETGEaERIDVSQAGPPKPYtGNKLPATVDGRNGHW\*  
TaMPK16(1BS) EQYEQRrvITSQGIVPNGVPSGSSYPrrNNTCKSETGEaERIDVSQAVPPKPYtGNKLPATVDGRNGHW\*  
ABC54584.1 EQYEQRrvITSQGIVPNGVPSGSSYPrrNNTCKSETGEaERIDVSQAVPPKPYtGNKLPATVDGRNGHW\*  
AetMPK16 EQYEQRrvITSQGVVPNGVPSGSSYPrrNNTCKSETGEaERIDVSQAGPPKPYtGNKLPATVDGRNGHW\*  
TaMPK16(U) EQYEQRrvITSQGVVPNGVPSGSSYPrrNNTCKSETGEaERIDVSQAGPPKPYtGNKLPATVDGRNGHW\*  
TuMPK16 EQYEQRrvVTSQGIVPNGVPSGSSYPrrNNTCKSETGEaERIDVSQAGPPKPYtGNKLPATVDGRNGHW\*  
TaMPK16(1AS) EQYEQRrvVTSQGIVPNGVPSGSSYPrrNNTCKSETGEaERIDVSQAGPPKPYtGNKLAATVDGRNGHW\*  
::\* \* :.\*.: \* .\* :: . \* . \*\* .\* .



MPK17 continued

|              | <b>TRWYRAPEL</b> | <b>IDxWS<sup>v</sup><sub>i</sub>GC</b> | <b>LLE<sup>R</sup><sub>k</sub>LLA</b> |
|--------------|------------------|----------------------------------------|---------------------------------------|
| TaMPK17(U)   | DAPSAIFWTDYVATR  | WYRAPEL                                | CGSFFSKYTPAIDIWSIGCIFAELLTGRPLFP      |
| TsMPK17(Ub)  | DAPSAIFWTDYVATR  | WYRAPEL                                | CGSFFSKYTPAIDIWSIGCIFAELLTGRPLFP      |
| ABD97883.1   | DAPSAIFWTDYVATR  | WYRAPEL                                | CGSFFSKYTPAIDIWSIGCIFAELLTGRPLFP      |
| AetMPK17     | DAPSAIFWTDYVATR  | WYRAPEL                                | CGSFFSKYTPAIDIWSIGCIFAELLTGRPLFP      |
| TaMPK17(7DL) | DAPSAIFWTDYVATR  | WYRAPEL                                | CGSFFSKYTPAIDIWSIGCIFAELLTGRPLFP      |
| AAx20165.1   | DAPSAIFWTDYVATR  | WYRAPEL                                | CGSFFSKYTPAIDIWSIGCIFAELLTGRPLFP      |
| AAx20166.1   | DAPSAIFWTDYVATR  | WYRAPEL                                | CGSFFSKYTPAIDIWSIGCIFAELLTGRPLFP      |
| TsMPK17(R)   | DAPSAIFWTDYVATR  | WYRAPEL                                | CGSFFSKYTPAIDIWSIGCIFAELLTGRPLFP      |
| ScMPK17      | DAPSAIFWTDYVATR  | WYRAPEL                                | CGSFFSKYTPAIDIWSIGCIFAELLTGRPLFP      |
| HvMPK17(7H)  | DAPSAIFWTDYVATR  | WYRAPEL                                | CGSFFSKYTPAIDIWSIGCIFAELLTGRPLFP      |
| BAK07695.1   | DAPSAIFWTDYVATR  | WYRAPEL                                | CGSFFSKYTPAIDIWSIGCIFAELLTGRPLFP      |
| AK252439.1   | DAPSAIFWTDYVATR  | WYRAPEL                                | CGSFFSKYTPAIDIWSIGCIFAELLTGRPLFP      |
| ABC65848.1*  | DAPSAIFWTDYVATR  | WYRAPEL                                | CGSFFSKYTPAIDIWSIGCIFAELLTGRPLFP      |
| TuMPK17p     | DAPSAIFWTDYVATR  | WYRAPEL                                | CGSFFSKYTPAIDIWSIGCIFAELLTGRPLF       |
| TaMPK17(7AL) | DAPSAIFWTDYVATR  | WYRAPEL                                | CGSFFSKYTPAIDIWSIGCIFAELLTGRPLFP      |
| TsMPK17(A)   | DAPSAIFWTDYVATR  | WYRAPEL                                | CGSFFSKYTPAIDIWSIGCIFAELLTGRPLFP      |
| ABC54587.1   | DAPSAIFWTDYVATR  | WYRAPEL                                | CGSFFSKYTPAIDIWSIGCIFAELLTGRPLFP      |
| AK333198.1*  | DAPSAIFWTDYVATR  | WYRAPEL                                | CGSFFSKYTPAIDIWSIGCIFAELLTGRPLFP      |

\*\*\*\*\*

**FDPKDRPTAEAL**

|              |                             |                                                                         |                        |
|--------------|-----------------------------|-------------------------------------------------------------------------|------------------------|
| TaMPK17(U)   | FDPKDRPSAEEALADPYFASLANVERE | PSRHPISKLEFEFERRKVTKDDVRELIYREILEYHPQMLEEYMKGGDQISFLYPSGVDRFKRQFAHLEEHY | SKGERGSPLQRKHASLPRQVRG |
| TsMPK17(Ub)  | FDPKDRPSAEEALADPYFASLANVERE | PSRHPISKLEFEFERRKVTKDDVRELIYREILEYHPQMLEEYMKGGDQISFLYPSGVDRFKRQFAHLEEHY | SKGERGSPLQRKHASLPRQVRG |
| ABD97883.1   | FDPKDRPSAEEALADPYFASLANVERE | PSRHPISKLEFEFERRKVTKDDVRELIYREILEYHPQMLEEYMKGGDQISFLYPSGVDRFKRQFAHLEEHY | SKGERGSPLQRKHASLPRQVRG |
| AetMPK17     | FDPKDRPSAEEALADPYFASLANVERE | PSRHPISKLEFEFERRKVTKDDVRELIYREILEYHPQMLEEYMKGGDQISFLYPSGVDRFKRQFAHLEEHY | SKGERGSPLQRKHASLPRQVRG |
| TaMPK17(7DL) | FDPKDRPSAEEALADPYFASLANVERE | PSRHPISKLEFEFERRKVTKDDVRELIYREILEYHPQMLEEYMKGGDQISFLYPSGVDRFKRQFAHLEEHY | SKGERGSPLQRKHASLPRQVRG |
| AAx20165.1   | FDPKDRPSAEEALADPYFASLANVERE | PSRHPISKLEFEFERRKVTKDDVRELIYREILEYHPQMLEEYMKGGDQISFLYPSGVDRFKRQFAHLEEHY | SKGERGSPLQRKHASLPRQVRG |
| AAx20166.1   | FDPKDRPSAEEALADPYFASLANVERE | PSRHPISKLEFEFERRKVTKDDVRELIYREILEYHPQMLEEYMKGGDQISFLYPSGVDRFKRQFAHLEEHY | SKGERGSPLQRKHASLPRQVRG |
| TsMPK17(R)   | FDPKDRPSAEEALADPYFASLANVERE | PSRHPISKLEFEFERRKVTKDDVRELIYREILEYHPQMLEEYMKGGDQISFLYPSGVDRFKRQFAHLEEHY | SKGERGSPLQRKHASLPRQVRG |
| ScMPK17      | FDPKDRPSAEEALADPYFASLANVERE | PSRHPISKLEFEFERRKVTKDDVRELIYREILEYHPQMLEEYMKGGDQISFLYPSGVDRFKRQFAHLEEHY | SKGERGSPLQRKHASLPRQVRG |
| HvMPK17(7H)  | FDPKDRPSAEEALADPYFASLANVERE | PSRHPISKLEFEFERRKVTKDDVRELIYREILEYHPQMLEEYMKGGDQISFLYPSGVDRFKRQFAHLEEHY | SKGERGSPLQRKHASLPRQVRG |
| BAK07695.1   | FDPKDRPSAEEALADPYFASLANVERE | PSRHPISKLEFEFERRKVTKDDVRELIYREILEYHPQMLEEYMKGGDQISFLYPSGVDRFKRQFAHLEEHY | SKGERGSPLQRKHASLPRQVRG |
| AK252439.1   | FDPKDRPSAEEALADPYFASLANVERE | PSRHPISKLEFEFERRKVTKDDVRELIYREILEYHPQMLEEYMKGGDQISFLYPSGVDRFKRQFAHLEEHY | SKGERGSPLQRKHASLPRQVRG |
| ABC65848.1*  | FDPKDRPSAEEVNSSTFV          |                                                                         |                        |
| TuMPK17p     |                             |                                                                         |                        |
| TaMPK17(7AL) | FDPKDRPSAEEALADPYFASLANVERE | PSRHPISKLEFEFERRKVTKDDVRELIYREILEYHPQMLEEYMKGGDQISFLYPSGVDRFKRQFAHLEEHY | SKGERGSPLQRKHASLPRQVRG |
| TsMPK17(A)   | FDPKDRPSAEEALADPYFASLANVERE | PSRHPISKLEFEFERRKVTKDDVRELIYREILEYHPQMLEEYMKGGDQISFLYPSGVDRFKRQFAHLEEHY | SKGERGSPLQRKHASLPRQVRG |
| ABC54587.1   | FDPKDRPSAEEALADPYFASLANVERE | PSRHPISKLEFEFERRKVTKDDVRELIYREILEYHPQMLEEYMKGGDQISFLYPSGVDRFKRQFAHLEEHY | SKGERGSPLQRKHASLPRQVRG |
| AK333198.1*  | FDPKDRPSAEEALADPYFASLANVERE | PSRHPISKLEFEFERRKVTKDDVRELIYREILEYHPQMLEEYMKGGDQISFLYPSGVDRFKRQFAHLEEHY | SKGERGSPLQRKHASLPRQVRG |

MPK17 continued

TaMPK17(U) ASNDGNNEQHISDQEMSAEPDAHGAVSPQKSQDAPSVGPNGLSPTSLSSRITYLKSASISASKCVVNPKNKQPEYDDAISEETEGAVDGLSEKVS KMHA\*  
TsMPK17(Ub) ASNDGNNEQHISDQEMSAEPDAHGAVSPQKSQDAPSVGPNGLSPTSLSSRITYLKSASISASKCVVNPKNKQPEYDDAISEETEGAVDGLSEKVS KMHA\*  
ABD97883.1 ASNDGNNEQHISDQEMSAEPDAHGTVSPQKSQDAPSVGPNGLSPTSLSSRITYLKSASISASKCVVNPKNKQPEYDDAISEETEGAVDGLSEKVS KMHA\*  
AetMPK17 ASNDGNNEQHISDQEMSAEPDAHGTVSPQKSQDAAGVGQNGLSPTSLSSRITYLKSASISASKCVVNPKNKQPEYDDAISEETEGAVDGLSEKVS KMHA\*  
TaMPK17(7DL) ASNDGNNEQHISDQEMSAEPDAHGTVSPQKSQDAAGVGQNGLSPTSLSSRITYLKSASISASKCVVNPKNKQPEYDDAISEETEGAVDGLSEKVS KMHA\*  
AAX20165.1 ASNDGNNEQHISDQEMSAEPDAHGTVSPQKSQDAAGVGQNGLSPTSLSSRITYLKSASISASKCVVNPKNKQPEYDDAISEETEGAVDGLSEKVS KMHA\*  
AAX20166.1 ASNDGNNEQHISDQEMSAEPDAHGAVSPQKSQDAPGVGQNGLSPTSLSSRITYLKSASISASKCVVNPKNKQPEYDDAISEETEGAVDGLSEKVS KMHA\*  
TsMPK17(R) ASNDGNNEQHISDQEMSAEPDAHGTE SPQKAQDAPGVGQNGLSPTSLSSRITYLKSASISASKCVVNPKNKQPEYDDAISEEAEGAVDGLSEKVS KMHA\*  
ScMPK17 ASNDGNNEQHISDQEMSAEPDAHGTE SPQKAQDAPGVGQNGLSPTSLSSRITYLKSASISASKCVVNPKNKQPEYDDAISEEAEGAVDGLSEKVS KMHA\*  
HvMPK17(7H) -----  
BAK07695.1 -----  
AK252439.1 ASNDGNNEQHISDQEMSAEPDARGAVSPQKPQDAPGVGQNGLSPTSLSSRITYLKSASISASKCVVNPKNKQPEYDDAISEETEGAVDGLSEKVS KMHA\*  
ABC65848.1\* -----  
TuMPK17p -----  
TaMPK17(7AL) ASNDGNNEQHISDQEMSAEPDAHGAVSPQKSQDAPGVGQNGLSPTSLSSRITYLKSASISASKCVVNPKNKQPEYDDAISEETEGAVDGLSEKVS KMHA\*  
TsMPK17(A) ASNDGNNEQHISDQEMSAEPDAHGAVSPQKSQDAPGVGQNGLSPTSLSSRITYLKSASISASKCVVNPKNKQPEYDDAISEETEGAVDGLSEKVS KMHA\*  
ABC54587.1 ASNDGNNEQHISDQEMSAEPDAHGAVSPQKSQDAPGVGQNGLSPTSLSSRITYLKSASISASKCVVNPKNKQPEYDDAISEETEGAVDGLSEKVS KMHA\*  
AK333198.1\* ASNDGNNEQHISDQEMSAEPDAHGAVSPQKSQDAPGVGQNGLSPTSLSSRITYLKSASISASKCVVNPKNKQPEYDDAISEETEGAVDGLSEKVS KMHA\*

**MPK20-1**

```

AK252802.1p
TaMPK20-1(3B)
TsMPK20-1(U2)p*
TsMPK20-1(U1)
ScMPK20-1
TsMPK20-1(U3)
AetMPK20-1
TaMPK20-1(3AL)
AKS50324.1
TuMPK20-1
TaMPK20-1(3DL)

```

-----MQQDQRKKSSAEAEFFTEYGDASRYKIQEI  
VHGGPRKRIVAVAFPCRWAKLLAFLVGFSTWGCTTT\*LTSGACHHFNFATNTRSFCFSRKFL\*STCTAVEFGINSLILVVASQ\*LLILHVVH\*KYLESSAEAEFFTEYGDASRYKIQEI  
-----MQQDQRKKSSAEAEFFTEYGDASRYKIQEI  
-----MISVILFQSSAEAEFFTEYGDASRYKIQEI  
-----MQQDQRKKSSAEAEFFTEYGDASRYKIQEI  
-----MQQDQRKKSSAEAEFFTEYGDASRYKIQEI  
-----MQQDQRKKSSAEAEFFTEYGDASRYKIQEI  
-----MQQDQRKKSSAEAEFFTEYGDASRYKIQEI  
-----MQQDQRKKSSAEAEFFTEYGDASRYKIQEI  
-----MQQDQRKKSSAEAEFFTEYGDASRYKIQEI

**IGxGxYGxV**                      **IKKIxxxF**                      **DAxRxLRE**                                      **FxDIYxxxELM**    **DLxxVI**                                      **QxLRxLKYxH**                      **HR**

```

AK252802.1p
TaMPK20-1(3B)
TsMPK20-1(U2)p*
TsMPK20-1(U1)
ScMPK20-1
TsMPK20-1(U3)
AetMPK20-1
TaMPK20-1(3AL)
AKS50324.1
TuMPK20-1
TaMPK20-1(3DL)

```

VGKGSYGVVCSAIDVHTGEKVAIKKIHDIFEHISDAARILREIKLLRLLRHPDIVEIKHIMLPPSRDFKDIYVVFELMESDLHQVIKANDDLTKEHYQFFLYQLLRALKYIHTANVYHR  
VGKGSYGVVCSAIDVHTGEKVAIKKIHDIFEHISDAARILREIKLLRLLRHPDIVEIKHIMLPPSRDFKDIYVVFELMESDLHQVIKANDDLTKEHYQFFLYQLLRALKYIHTANVYHR  
VGKGSYGVVCSAIDVHTGEKVAIKKIHDIFEHISDAARILREIKLLRLLRHPDIVEIKHIMLPPSRDFKDIYVVFELMESDLHQVIKANDDLTKEHYQFFLYQLLRALKYIHTANVYHR  
VGKGSYGVVCSAIDVHTGEKVAIKKIHDIFEHISDAARILREIKLLRLLRHPDIVEIKHIMLPPSRDFKDIYVVFELMESDLHQVIKANDDLTKEHYQFFLYQLLRALKYIHTANVYHR  
VGKGSYGVVCSAIDVHTGEKVAIKKIHDIFEHISDAARILREIKLLRLLRHPDIVEIKHIMLPPSRDFKDIYVVFELMESDLHQVIKANDDLTKEHYQFFLYQLLRALKYIHTANVYHR  
VGKGSYGVVCSAIDVHTGEKVAIKKIHDIFEHISDAARILREIKLLRLLRHPDIVEIKHIMLPPSRDFKDIYVVFELMESDLHQVIKANDDLTKEHYQFFLYQLLRALKYIHTANVYHR  
VGKGSYGVVCSAIDVHTGEKVAIKKIHDIFEHISDAARILREIKLLRLLRHPDIVEIKHIMLPPSRDFKDIYVVFELMESDLHQVIKANDDLTKEHYQFFLYQLLRALKYIHTANVYHR  
VGKGSYGVVCSAIDVHTGEKVAIKKIHDIFEHISDAARILREIKLLRLLRHPDIVEIKHIMLPPSRDFKDIYVVFELMESDLHQVIKANDDLTKEHYQFFLYQLLRALKYIHTANVYHR

**DLKPxN**    **LxNxNCxLKIxDGLAR**                                      **TRWYRAPEL**                                      **IDxWS<sup>v</sup>GC**

```

AK252802.1p
TaMPK20-1(3B)
TsMPK20-1(U2)p*
TsMPK20-1(U1)
ScMPK20-1
TsMPK20-1(U3)
AetMPK20-1
TaMPK20-1(3AL)
AKS50324.1
TuMPK20-1
TaMPK20-1(3DL)

```

DLKPKNILANSNCKLKICDFGLARVAFNDTPTTIFWTDYVATRWRAPPELPGSFFSKYTPAIDVWSIGCIFAELVTGKPLFPKGNVVHQLDLMTDLLGTPSMDTISRVRNEKARRYLSSM  
DLKPKNILANSNCKLKICDFGLARVAFNDTPTTIFWTDYVATRWRAPPELPGSFFSKYTPAIDVWSIGCIFAELVTGKPLFPKGNVVHQLDLMTDLLGTPSMDTISRVRNEKARRYLSSM  
DLKPKNILANSNCKLKICDFGLARVAFNDTPTTIFWTDYVATRWRAPPELPGSFFSKYTPAIDVWSIGCIFAELVTGKPLFPKGNVVHQLDLMTDLLGTPSMDTISRVRNEKARRYLSSM  
DLKPKNILANSNCKLKICDFGLARVAFNDTPTTIFWTDYVATRWRAPPELPGSFFSKYTPAIDVWSIGCIFAELVTGKPLFPKGNVVHQLDLMTDLLGTPSMDTISRVRNEKARRYLSSM  
DLKPKNILANSNCKLKICDFGLARVAFNDTPTTIFWTDYVATRWRAPPELPGSFFSKYTPAIDVWSIGCIFAELVTGKPLFPKGNVVHQLDLMTDLLGTPSMDTISRVRNEKARRYLSSM  
DLKPKNILANSNCKLKICDFGLARVAFNDTPTTIFWTDYVATRWRAPPELPGSFFSKYTPAIDVWSIGCIFAELVTGKPLFPKGNVVHQLDLMTDLLGTPSMDTISRVRNEKARRYLSSM  
DLKPKNILANSNCKLKICDFGLARVAFNDTPTTIFWTDYVATRWRAPPELPGSFFSKYTPAIDVWSIGCIFAELVTGKPLFPKGNVVHQLDLMTDLLGTPSMDTISRVRNEKARRYLSSM  
DLKPKNILANSNCKLKICDFGLARVAFNDTPTTIFWTDYVATRWRAPPELPGSFFSKYTPAIDVWSIGCIFAELVTGKPLFPKGNVVHQLDLMTDLLGTPSMDTISRVRNEKARRYLSSM

MPK20-1 continued

LE<sup>R</sup>LLAFDPKDRPTAEEAL

AK252802.1p
TaMPK20-1(3B)
TsMPK20-1(U2)p\*
TsMPK20-1(U1)
ScMPK20-1
TsMPK20-1(U3)
AetMPK20-1
TaMPK20-1(3AL)
AKS50324.1
TuMPK20-1
TaMPK20-1(3DL)
RKKELISFSHKFPNADPLALDLLQRLLA...

AK252802.1p
TaMPK20-1(3B)
TsMPK20-1(U2)p\*
TsMPK20-1(U1)
ScMPK20-1
TsMPK20-1(U3)
AetMPK20-1
TaMPK20-1(3AL)
AKS50324.1
TuMPK20-1
TaMPK20-1(3DL)
HLEENTENGPVVPMDRKHTSLPRSTIVHSAP...

AK252802.1p
TaMPK20-1(3B)
TsMPK20-1(U2)p\*
TsMPK20-1(U1)
ScMPK20-1
TsMPK20-1(U3)
AetMPK20-1
TaMPK20-1(3AL)
AKS50324.1
TuMPK20-1
TaMPK20-1(3DL)
QIPQIYGYQTTPAKSACSEPSQAEMYTLHQ...



MPK20-2 continued

LE<sup>R</sup>LLAFDPKDRPTAEEAL

BAJ92365.1 DLMTDLLGTPSMDTISRVRNEKARRYLTSMRKKDPVPPFSQKFPNADPLGVKLLLEKLLAFDPKDRPTAEEALTDPYFRGLSKPEREPSCQPIRKMEFDFEHSRVSKDDIRELIFQEILEYH  
AK361419.1 DLMTDLLGTPSMDTISRVRNEKARRYLTSMRKKDPVPPFSQKFPNADPLGVKLLLEKLLAFDPKDRPTAEEALTDPYFRGLSKPEREPSCQPIRKMEFDFEHSRVSKDDIRELIFQEILEYH  
HvMPK20-2(1H) DLMTDLLGTPSMDTISRVRNEKARRYLTSMRKKDPVPPFSQKFPNADPLGVKLLLEKLLAFDPKDRPTAEEALTDPYFRGLSKPEREPSCQPIRKMEFDFEHSRVSKDDIRELIFQEILEYH  
ScMPK20-2 DLMTDLLGTPSMDTISRVRNEKARRYLSMRKKDPVPPFSQKFPNADPLGVKLLLEKLLAFDPKDRPTAEEALTDPYFRGLSKPEREPSCQPIRKLEFDFEHSRVSKDDIRELIFQEILEYH  
TsMPK20-2(U1) DLMTDLLGTPSMDTISRVRNEKARRYLSMRKKDPVPPFSQKFPNADPLGVKLLLEKLLAFDPKDRPTAEEALTDPYFRGLSKPEREPSCQPIRKMEFDFEHSRVSKDDIRELIFQEILEYH  
TsMPK20-2(U2) DLMTDLLGTPSMDTISRVRNEKARRYLSMRKKDPVPPFSQKFPNADPLGVKLLLEKLLAFDPKDRPTAEEALTDPYFRGLSKPEREPSCQPIRKMEFDFEHSRVSKDDIRELIFQEILEYH  
AetMPK20-2p DLMTDLLGTPSMDTISRVRNEKARRYLSMRKKDPVPPFSQKFPNADPLGVKLLLEKLLAFDPKDRPTAEEALTDPYFRGLSKPEREPSCQPIRKMEFDFEHSRVSKDDIRELIFQEILEYH  
TaMPK20-2(1DL) DLMTDLLGTPSMDTISRVRNEKARRYLSMRKKDPVPPFSQKFPNADPLGVKLLLEKLLAFDPKDRPTAEEALTDPYFRGLSKPEREPSCQPIRKMEFDFEHSRVSKDDIRELIFQEILEYH  
tplb0059e09 DLMTDLLGTPSMDTISRVRNEKARRYLSMRKKDPVPPFSQKFPNADPLGVKLLLEKLLAFDPKDRPTAEEALTDPYFRGLSKPEREPSCQPIRKMEFDFEHSRVSKDDIRELIFQEILEYH  
TaMPK20-2(1BL) DLMTDLLGTPSMDTISRVRNEKARRYLSMRKKDPVPPFSQKFPNADPLGVKLLLEKLLAFDPKDRPTAEEALTDPYFRGLSKPEREPSCQPIRKMEFDFEHSRVSKDDIRELIFQEILEYH  
TuMPK20-2p DLMTDLLGTPSMDTISRVRNEKARRYLSMRKKDPVPPFSQKFPNADPLGVKLLLEKLLAFDPKDRPTAEEALTDPYFRGLSKPEREPSCQPIRKMEFDFEHSRVSKDDIRELIFQEILEYH  
TaMPK20-2(1AL) DLMTDLLGTPSMDTISRVRNEKARRYLSMRKKDPVPPFSQKFPNADPLGVKLLLEKLLAFDPKDRPTAEEALTDPYFRGLSKPEREPSCQPIRKMEFDFEHSRVSKDDIRELIFQEILEYH  
AK331818.1 DLMTDLLGTPSMDTISRVRNEKARRYLSMRKKDPVPPFSQKFPNADPLGVKLLLEKLLAFDPKDRPTAEEALTDPYFRGLSKPEREPSCQPIRKMEFDFEHSRVSKDDIRELIFQEILEYH  
\*\*\*\*\*:\*\*\*\*\*:\*\*\*\*\*

BAJ92365.1 PQLLKSVIDGTERTTFLYPSAVDHFKKQFSHLEESDGS GPVVPADRKHASLPRSTIVHSTPIPAKDTRPLFGKPCSKTSSETGRYAGNGHGASQASHAAQAVVSRRRAAGSALPYEGGSGK  
AK361419.1 PQLLKSVIDGTERTTFLYPSAVDHFKKQFSHLEESDGS GPVVPADRKHASLPRSTIVHSTPIPAKDTRPLFGKPCSKTSSETGRYAGNGHGASQASHAAQAVVSRRRAAGSALPYEGGSGK  
HvMPK20-2(1H) PQLLKSVIDGTERTTFLYPSAVDHFKKQFSHLEESDGS GPVVPADRKHASLPRSTIVHSTPIPAKDTRPLFGKPCSKTSSETGRYAGNGHGASQASHAAQAVVSRRRAAGSALPYEGGSGK  
ScMPK20-2 PQLLKSVIDGTERTTFLYPSAVDHFKKQFSHLEESDGS GPVVPADRKHASLPRSTIVHSTPIPAKDTRPLFGKPCSKTSSETGRYAGNGHGASQASHAAQAVVSRRRAAGSALPSEAGVGR  
TsMPK20-2(U1) PQLLKSVIDGTERTTFLYPSAVDHFKKQFSHLEESDGS GPVVPADRKHASLPRSTIVHSTPIPAKDTRPLFGKPCSKTSSETGRYAGNGHGASQASHAAQAVVSRRRAAGSALPSEAGVGR  
TsMPK20-2(U2) PQLLKSVIDGTERTTFLYPSAVDHFKKQFSHLEESDGS GPVVPADRKHASLPRSTIVHSAPIPAKDTRPLFGKPCSKTSSETGRYAGNGRGASQASHAAQAVVSRRRAAGSAL-----  
AetMPK20-2p PQLLKSVIDGTERTTFLYPSAVDHFKKQFSHLEESDGS GPVVPADRKHASLPRSTIVHSTPIPAKDTRPLFGKPCNKTSSSETGRYAGNGHGASQASHAAQAVVSRRRAAGSAL-----  
TaMPK20-2(1DL) PQLLKSVIDGTERTTFLYPSAVDHFKKQFSHLEESDGS GPVVPADRKHASLPRSTIVHSTPIPAKDTRPLFGKPCNKTSSSETGRYAGNGHSASQASHAAQAVVSRRRAAGSAL-----  
tplb0059e09 PQLLKSVIDGTERTTFLYPSAVDHFKKQFSHLEESDGS GPVVPADRKHASLPRSTIVHSTPIPAKDTRPLFGKPCNKTSSSETGRYAGNGHSASQASHAAQAVVSRRRAAGSAL-----  
TaMPK20-2(1BL) PQLLKSVIDGTERTTFLYPSAVDHFKKQFSHLEESDGS GPVVPADRKHASLPRSTIVHSTPIPAKDTRPLFGKPCNKTSSSETGRYAGNGHGASQASHAAQAVISRRRAAGSAL-----  
TuMPK20-2p PQLLKSVIDGTERTTFLYPSAVDHFKKQFSHLEESDGS GPVVPADRKHASLPRSTIVHSAPIPAKDTRPLFGKPCSKTSSETGRYAGNGHGASQASHAAQAVVSRRRAAGSAL-----  
TaMPK20-2(1AL) PQLLKSVIDGTERTTFLYPSAVDHFKKQFSHLEESDGS GPVVPADRKHASLPRSTIVHSAPIPAKDTRPLFGKPCSKTSSETGRYAGNGRGASQASHAAQAVVSRRRAAGSAL-----  
AK331818.1 PQLLKSVIDGTERTTFLYPSAVDHFKKQFSHLEESDGS GPVVPADRKHASLPRSTIVHSAPIPAKDTRPLFGKPCSKTSSETGRYAGNGRGASQASHAAQAVVSRRRAAGSAL-----  
\*\*\*\*\*. \* \*\*\*\*\*: \*\* \*\*\*\*\*. \*\*\*\*\*: \*\*\*\*\*:\*\*\*\*\*

MPK20-2 continued

BAJ92365.1 HPYDVASRPAMSTGCPPQQQIPQMYGQYQHQAAPAGAGAGAGAGIPQAMGGYACGGYAKGTAP----APAMRAPTYRHVPAGQKNGRLDRLAVETTDIYTRSLNGIVAAAAASAGTASAHRKVGTVPFGMPTTY\*  
AK361419.1 HPYDVASRPAMSTGCPPQQQIPQMYGQYQHQAAPAGAGAGAGAGIPQAMGGYACGGYAKGTAP----APAMRAPTYRHVPAGQKNGRLDRLAVETTDIYTRSLNGIVAAAAASAGTASAHRKVGTVPFGMPTTY\*  
HvMPK20-2(1H) HPYDVASRPAMSTGCPPQQQIPQMYGQYQHQAAPAGAGAGAGAGIPQAMGGYACGGYAKGTAP----APAMRAPTYRHVPAGQKNGRLDRLAVETTDIYTRSLNGIVAAAAASAGTASAHRKVGTVPFGMPTTY\*  
ScMPK20-2 YPYDAASRPAMSSGCPPQQQIPQLYGQYQHQAAPGA---GAGIPQTMGGYACGGYTKGTAPNAAAAAPAMRAPPYRHLPGVQKNGPLDRLAVETTDIYTRSLNGIVAAAAASAGTAGAHRKVGAVPFGMPTTY\*  
TsMPK20-2(U1) YPYDAASRPAMSSGCPPQQQIPQLYGQYQHQAAPGA---GAGIPQTMGGYACGGYTKGTAPNAAAAAPAMRAPPYRHLPGVQKNGPLDRLAVETTDIYTRSLNGIVAAAAASAGTASAHRKVGAVPFGMPTTY\*  
TsMPK20-2(U2) -PYDAASRPTISPGCPPQQQIPQMYGQYQHQAAPA-----GAGIPQAMGGYACGGYTKGTAPNAAAAAPAMRAPPYRHLPGVQKNGPLDRLAVETTDIYTRSLNGIVAAAAASAGTASAHRKVGAVPFGMPTTY\*  
AetMPK20-2p -PYDAASRPAMSPGCP-QQQIPQMYGQYQHQAAPGA---GAGIPQAMGGYACGAYTKGTAPNAAAAAPAMRAPPYRHLPGVQKNGPLDRLAVETTDIYTRSLNGIVAAAAASAGATSahrKVGAVPFGMPTTY\*  
TaMPK20-2(1DL) -PYDAASRPTISPGCP-QQQIPQMYGQYQHQAAPGA---GAGIPQTMGGYACGGYTKGTAPNAA-AAPAMRAPPYRHLPGVQKNGPLDRLAVETTDIYTRSLNGIVAAAAASAGATSahrKVGAVPFGMPTTY\*  
tp1b0059e09 -PYDAASRPTISPGCP-QQQIPQMYGQYQHQAAPGA---GAGIPQTMGGYACGGYTKGTAPNAA-AAPAMRAPPYRHLPGVQKNGPLDRLAVETTDIYTRSLNGIVAAAAASAGATSahrKVGAVPFGMPTTY\*  
TaMPK20-2(1BL) -PYDAASRPTISPGCPPQQQIPQMYGQYQHQAAPGA--GAGAGIPQAMGGYACGGYTKGTAPNAAAAAPAMRAPPYRHLPTGQKNGPLDRLAVETTDIYTRSLNGIVAAAAASAGATGAHRKVGAVPFGMPTTY\*  
TuMPK20-2p -PYDAASRPTISPGCPPQQQIPQMYGQYQHQAAPA-----GAGIPQAMGGYACGGYTKGTAPDAA-RG-----  
TaMPK20-2(1AL) -PYDAASRPTISPGCPPQQQIPQMYGQYQHQAAPA-----GAGIPQAMGGYACGGYTKGTAPNAA-AAPAMRAPPYRHLPGVQKNGPLDRLAVETTDIYTRSLNGIVAAAAASAGTASAHRKVGAVPFGMPTTY\*  
AK331818.1 -PYDAASRPTISPGCPPQQQIPQMYGQYQHQAAPA-----GAGIPQAMGGYACGGYTKGTAPNAA-AAPAMRAPPYRHLPGVQKNGPLDRLAVETTDIYTRSLNGIVAAAAASAGTASAHRKVGAVPFGMPTTY\*  
\*\*\*.\*\*\*\*:;\* \*\*\* \*\*\*\*\*:\*\*\*\*\* \*\*\*\*\*:\*\*\*\*:\*.\*:\*\*\*\*\*



MPK20-4

HvMPK20-4 (3H) MQPDQQQ--HQRRKGSSEMDFFSEYGDANRYKIQEVI**IGxGxYGxV** IKKI**IxxxF** DAxRxLRE FxDIYxxxELM DL  
 BAJ97013.1 MQPDQQQ--HQRRKGSSEMDFFSEYGDANRYKIQEVI**IGKSGYGVVCSAIDQHNGDKVAIKK**IHNI**FEHLSDAARILREIKLLRLLRHPDIVEIRHIMLPPSRRDFKDIYVVFELMDTDL**  
 BAJ96852.1 MQPDQQQ--HQRRKGSSEMDFFSEYGDANRYKIQEVI**IGKSGYGVVCSAIDQHNGDKVAIKK**IHNI**FEHLSDAARILREIKLLRLLRHPDIVEIRHIMLPPSRRDFKDIYVVFELMDTDL**  
 ScMPK20-4 MQPDQQ--QQQRRKGSPEMDFFSEYGDANRYKIQEVI**IGKSGYGVVCSAIDQHTGDKVAIKK**IHNI**FEHLSDAARILREIKLLRLLRHPDIVEIRHIMLPPSRRDFKDIYVVFELMDTDL**  
 TsMPK20-4 (U) MQPDQQ--QQQRRKGSPEMDFFSEYGDANRYKIQEVI**IGKSGYGVVCSAIDQHTGDKVAIKK**IHNI**FEHLSDAARILREIKLLRLLRHPDIVEIRHIMLPPSRRDFKDIYVVFELMDTDL**  
 TuMPK20-4 ----MQPDQHQQRRKGSSEMDFFSEYGDANRYKIQEVI**IGKSGYGVVCSAIDQHTGDKVAIKK**IHNI**FEHLSDAARILREIKLLRLLRHPDIVEIRHIMLPPSRRDFKDIYVVFELMDTDL**  
 TaMPK20-4 (3AL) ----MQPDQNQQRRKGSSEMDFFSEYGDANRYKIQEVI**IGKSGYGVVCSAIDQHTGDKVAIKK**IHNI**FEHLSDAARILREIKLLRLLRHPDIVEIRHIMLPPSRRDFKDIYVVFELMDTDL**  
 AetMPK20-4 MQPD--QHQQQRRKGSSEMDFFSEYGDANRYKIQEVI**IGKSGYGVVCSAIDQHTGDKVAIKK**IHNI**FEHLSDAARILREIKLLRLLRHPDIVEIRHIMLPPSRRDFKDIYVVFELMDTDL**  
 TaMPK20-4 (3DL) MQPD--QHQQQRRKGSSEMDFFSEYGDANRYKIQEVI**IGKSGYGVVCSAIDQHTGDKVAIKK**IHNI**FEHLSDAARILREIKLLRLLRHPDIVEIRHIMLPPSRRDFKDIYVVFELMDTDL**  
 TaMPK20-4 (3B) MQPDQQQHQQRRKGSSEMDFFSEYGDANRYKIQEVI**IGKSGYGVVCSAIDQHTGDKVAIKK**IHNI**FEHLSDAARILREIKLLRLLRHPDIVEIRHIMLPPSRRDFKDIYVVFELMDTDL**  
 AK333309.1p MQPDQQQHQQRRKGSSEMDFFSEYGDANRYKIQEVI**IGKSGYGVVCSAIDQHTGDKVAIKK**IHNI**FEHLSDAARILREIKLLRLLRHPDIVEIRHIMLPPSRRDFKDIYVVFELMDTDL**  
 :\*\*\*\*\* :\*\*\*\*\*

**xxVI** **QxLRxLKYxH** **HRDLKPxN LxNxNCxLKIxDGLAR** **TRWYRAPEL** **IDxWS<sup>v</sup>iGC**  
 HvMPK20-4 (3H) HQVIKANDDLTKEHHQFFLYQMLRALKYIHTAN**VYHRDLKPKNILANAN**CKLKICDFGLARVAFNDTPTTVF**WTDYV**ATRWYRAPEL**CGSFF**TKYSPAIDIWSIGCIFAELT**GKPL**FPG  
 BAJ97013.1 HQVIKANDDLTKEHHQFFLYQMLRALKYIHTAN**VYHRDLKPKNILANAN**CKLKICDFGLARVAFNDTPTTVF**WTDYV**ATRWYRAPEL**CGSFF**TKYSPAIDIWSIGCIFAELT**GKPL**FPG  
 BAJ96852.1 HQVIKANDDLTKEHHQFFLYQMLRALKYIHTAN**VYHRDLKPKNILANAN**CKLKICDFGLARVAFNDTPTTVF**WTDYV**ATRWYRAPEL**CGSFF**TKYSPAIDIWSIGCIFAELT**GKPL**FPG  
 ScMPK20-4 HQVIKANDDLTKEHHQFFLYQMLRALKYIHTAN**VYHRDLKPKNILANAN**CKLKICDFGLARVAFNDTPTTVF**WTDYV**ATRWYRAPEL**CGSFF**TKYSPAIDIWSIGCIFAELT**GKPL**FPG  
 TsMPK20-4 (U) HQVIKANDDLTKEHHQFFLYQMLRALKYIHTAN**VYHRDLKPKNILANAN**CKLKICDFGLARVAFNDTPTTVF**WTDYV**ATRWYRAPEL**CGSFF**TKYSPAIDIWSIGCIFAELT**GKPL**FPG  
 TuMPK20-4 HQVIKANDDLTKEHHQFFLYQMLRALKYIHTAN**VYHRDLKPKNILANAN**CKLKICDFGLARVAFNDTPTTVF**WTDYV**ATRWYRAPEL**CGSFF**TKYSPAIDIWSIGCIFAELT**GKPL**FPG  
 TaMPK20-4 (3AL) HQVIKANDDLTKEHHQFFLYQMLRALKYIHTAN**VYHRDLKPKNILANAN**CKLKICDFGLARVAFNDTPTTVF**WTDYV**ATRWYRAPEL**CGSFF**TKYSPAIDIWSIGCIFAELT**GKPL**FPG  
 AetMPK20-4 HQVIKANDDLTKEHHQFFLYQMLRALKYIHTAN**VYHRDLKPKNILANAN**CKLKICDFGLARVAFNDTPTTVF**WTDYV**ATRWYRAPEL**CGSFF**TKYSPAIDIWSIGCIFAELT**GKPL**FPG  
 TaMPK20-4 (3DL) HQVIKANDDLTKEHHQFFLYQMLRALKYIHTAN**VYHRDLKPKNILANAN**CKLKICDFGLARVAFNDTPTTVF**WTDYV**ATRWYRAPEL**CGSFF**TKYSPAIDIWSIGCIFAELT**GKPL**FPG  
 TaMPK20-4 (3B) HQVIKANDDLTKEHHQFFLYQMLRALKYIHTAN**VYHRDLKPKNILANAN**CKLKICDFGLARVAFNDTPTTVF**WTDYV**ATRWYRAPEL**CGSFF**TKYSPAIDIWSIGCIFAELT**GKPL**FPG  
 AK333309.1p HQVIKANDDLTKEHHQFFLYQMLRALKYIHTAN**VYHRDLKPKNILANAN**CKLKICDFGLARVAFNDTPTTVF**WTDYV**ATRWYRAPEL**CGSFF**TKYSPAIDIWSIGCIFAELT**GKPL**FPG  
 \*\*\*\*\*

**LE<sup>R</sup>LLAFDPKDRPTAEEL**  
 HvMPK20-4 (3H) KNVVHQLDLMTDLLGTPSLDTSRIRNEKARRYLSMRKKQTVCFSERFPKADPAALK**MQRLLAFDPKDRPTAEEL**ADPYFKGLGKVEREPSCQPI**SKFEF**EFERKKVTKEDVKELIF  
 BAJ97013.1 KNVVHQLDLMTDLLGTPSLDTSRIRNEKARRYLSMRKKQTVCFSERFPKADPAALK**MQRLLAFDPKDRPTAEEL**ADPYFKGLGKVEREPSCQPI**SKFEF**EFERKKVTKEDVKELIF  
 BAJ96852.1 KNVVHQLDLMTDLLGTPSLDTSRIRNEKARRYLSMRKKQTVCFSERFPKADPAALK**MQRLLAFDPKDRPTAEEL**ADPYFKGLGKVEREPSCQPI**SKFEF**EFERKKVTKEDVKELIF  
 ScMPK20-4 KNVVHQLDLMTDLLGTPSLDTSRIRNEKARRYLSMRKKQVCFSERFPKADAAALK**MQRLLAFDPKDRPTAEEL**ADPYFKGLGKVEREPSCQPI**SKFEF**EFERKKVTKEDVKELIF  
 TsMPK20-4 (U) KNVVHQLDLMTDLLGTPSLDTSRIRNEKARRYLSMRKKQVCFSERFPKADAAALK**MQRLLAFDPKDRPTAEEL**ADPYFKGLGKVEREPSCQPI**SKFEF**EFERKKVTKEDVKELIF  
 TuMPK20-4 KNVVHQLDLMTDLLGTPSLDTSRIRNEKARRYLSMRKKQVCFSERFPKADPAALK**MQRLLAFDPKDRPTAEEL**ADPYFKGLGKVEREPSCQPI**SKFEF**EFERKKVTKEDVKELIF  
 TaMPK20-4 (3AL) KNVVHQLDLMTDLLGTPSLDTSRIRNEKARRYLSMRKKQVCFSERFPKADPAALK**MQRLLAFDPKDRPTAEEL**ADPYFKGLGKVEREPSCQPI**SKFEF**EFERKKVTKEDVKELIF  
 AetMPK20-4 KNVVHQLDLMTDLLGTPSLDTSRIRNEKARRYLSMRKKQVCFSERFPKADPAALK**MQRLLAFDPKDRPTAEEL**ADPYFKGLGKVEREPSCQPI**SKFEF**EFERKKVTKEDVKELIF  
 TaMPK20-4 (3DL) KNVVHQLDLMTDLLGTPSLDTSRIRNEKARRYLSMRKKQVCFSERFPKADPAALK**MQRLLAFDPKDRPTAEEL**ADPYFKGLGKVEREPSCQPI**SKFEF**EFERKKVTKEDVKELIF  
 TaMPK20-4 (3B) KNVVHQLDLMTDLLGTPSLDTSRIRNEKARRYLSMRKKQVCFSERFPKADPA**AFKLMQRLLAFDPKDRPTAEEL**ADPYFKGLGKVEREPSCQPI**SKFEF**EFERKKVTKEDVKELIF  
 AK333309.1p KNVVHQLDLMTDLLGTPSLDTSV-----  
 \*\*\*\*\*

MPK20-4 continued

HvMPK20-4 (3H) REILEYHPQLLKDYMNGTEKTNFLYPS-----AVDNFRRQFANLEENGGKGGAVVPSDRKHVSLP-----  
BAJ97013.1 REILEYHPQLLKDYMNGTEKTNFLYPS-----AVDNFRRQFANLEENGGKGGAVVPSDRKHVSLP-----  
BAJ96852.1 REILEYHPQLLKDYMNGTEKTNFLYPS-----AVDNFRRQFANLEENGGKGGAVVPSDRKHVSLP-----  
ScMPK20-4 REILEYHPQLLKDYMNGTEKTNFLYPGFYHKISSIFFHYMPIFITDPFLVPMLLSAVDNFRRQFANLEENGGKGGAIIVPSDRKHVSLPFFGDL-----MVLWNR  
TsMPK20-4 (U) REILEYHPQLLKDYMNGTEKTNFLYPS-----AVDNFRRQFANLEENGGKGGAIIVPSDRKHVSLPVLSHGTMESLYMTKDGQVVRNFSSSLMIWHD  
TuMPK20-4 REILEYHPQLLKDYMNGTEKSNFLYPS-----AVDNFRRQFANLEENGGKGGAIIVPSDRKHVSLP-----  
TaMPK20-4 (3AL) REILEYHPQLLKDYMNGTEKTNFLYPS-----AVDNFRRQFANLEENGGKGGAIIVPSDRKHVSLP-----  
AetMPK20-4 REILEYHPQLLKDYMNGTEKTNFLYPS-----AVDNFRRQFANLEENGGKGGAIIVPSDRKHVSLP-----  
TaMPK20-4 (3DL) REILEYHPQLLKDYMNGTEKTNFLYPS-----AVDNFRRQFANLEENGGKGGAIIVPSDRKHVSLP-----  
TaMPK20-4 (3B) REILEYHPQLLKDYMNGTEKTNFLYPS-----AVDNFRRQFANLEENGGKGGAIIVPSDRKHVSLP-----  
AK333309.1p -----

HvMPK20-4 (3H) -----RTTTVHSTPIPPKDQKPSQVPQRIPTGRPGRVVGVPVPIFENSCAMPYSQRRVARNPVLPAATNLSAYAYHRKSDNTERELQQELEKDRMQYQPMQRFMDAK  
BAJ97013.1 -----RTTTVHSTPIPPKDQKPSQVPQRIPTGRPGRVVGVPVPIFENSCAMPYSQRRVARNPVLPAATNLSAYAYHRKSDNTERELQQELEKDRMQYQPMQRFMDAK  
BAJ96852.1 -----RTTTVHSTPIPPKDQKPSQVPQRIPTGRPGRVVGVPVPIFENSCAMPYSQRRVARNPVLPAATNLSAYAYHRKSDNTERELQQELEKDRMQYQPMQRFMDAK  
ScMPK20-4 FT-----QKMVRTTTTVHSTSIIPKEQKSSQVPQRIPTGRPGRVVGVPVPIFENSCAMPYSQRRVARNPVLPAATNLSAYAYHRKSDSSERELQQELEKDRMQYQPMQRFMDAK  
TsMPK20-4 (U) NFRDCHSTLLADIFAFDRTTTVHSTPIPPKDQKSSQVPQRIPTGRPGRVVGVPVPIFENSCAMPYSQRRVARNPVLPAATNLSAYAYHRKSDSSERELQQELEKDRMQYQPMQRFMDAK  
TuMPK20-4 -----RTTTVHSTPIPPKDQKSSQVPQRIPTGRPGRVVGVPVPIFENSCAMPYSQRRVARNPVLPAATNLSAYAYHRKSDSSERELQQELEKDRMQYQPMQRFMDAK  
TaMPK20-4 (3AL) -----RTTTVHSTPIPPKDQKSSQVPQRIPTGRPGRVVGVPVPIFENSCAMPYSQRRVARNPVLPAATNLSAYAYHRKSDSSERELQQELEKDRMQYQPMQRFMDAK  
AetMPK20-4 -----RTTTVHSTPIPPKDQKSSQVPQRIPTGRPGRVVGVPVPIFENSCAMPYSQRRVARNPVLPAATNLSAYAYHRKSDSSERELQQELEKDRMQYQPMQRFMDAK  
TaMPK20-4 (3DL) -----RTTTVHSTPIPPKDQKSSQVPQRIPTGRPGRVVGVPVPIFENSCAMPYSQRRVARNPVLPAATNLSAYAYHRKSDSSERELQQELEKDRMQYQPMQRFMDAK  
TaMPK20-4 (3B) -----RTTTVHSTPIPPKDQKSSQVPQRIPTGRPGRVVGVPVPIFENSCAMPYSQRRVARNPVLPAATNLSAYAYHRKSDSSERELQQELEKDRMQYQPMQRFMDAK  
AK333309.1p -----

HvMPK20-4 (3H) MVSPDLRSSSYMPKGVPKADVAERTALQPNNMQGIAPFNGLIAAVGGSYNKASAVQYGVSRMY\*  
BAJ97013.1 MVSPDLRSSSYMPKGVPKADVAERTALQPNNMQGIAPFNGLIAAVGGSYNKASAVQYGVSRMY\*  
BAJ96852.1 MVSPDLRSSSYMPKGVPKADVAERTALQPNNMQGIAPFNGLIAAVGGSYNKASAVQYGVSRMY\*  
ScMPK20-4 MVSPDLRSTSYMPKGVPKADVAERTGLQPNNMQGIAPFNGLIAAVGGSYNKASAVQYGVSRMY\*  
TsMPK20-4 (U) MVSPDLRSTSYMPKGVPKADVAERTGLQPNNMQGIAPFNGLIAAVGGSYNKASAVQYGVSRMY\*  
TuMPK20-4 MVSPDLRSTSYMPKGVPKADVAERTGLQPNNMQGIAPFNGLIAAVGGSYNKASAVQYGVSRMY\*  
TaMPK20-4 (3AL) MVSPDLRSTSYMPKGVPKADVAERTGLQPNNMQGIAPFNGLIAAVGGSYNKASAVQYGVSRMY\*  
AetMPK20-4 MVSPDLRSTSYMPKGVPKADVAERTGLQPNNMQGIAPFNGLIAAVGGSYNKASAVQYGVSRMY\*  
TaMPK20-4 (3DL) MVSPDLRSTSYMPKGVPKADVAERTGLQPNNMQGIAPFNGLIAAVGGSYNKASAVQYGVSRMY\*  
TaMPK20-4 (3B) MVSPDLRSTSYMPKGVPKADVAERTGLQPNNMQGIAPFNGLIAAVGGSYNKASAVQYGVSRMY\*  
AK333309.1p -----





MPK21-1

BAK08351.1 -----MDPGKKTSESEFFTEYGELN  
TsMPK21-1(U)p MPSPPLVLKPQPLLLPTSPAPTHSAEKQQQPQRAHTRSSIAMAAAAAAGTREEMVYMAKLAEQAERYEEMVEFMGEAGRLRVALPRAPARTNPPPRMMDPGKKTSESEFFTEYGELN  
TaMPK21-1(1DL) -----MHTHSHTSESEFFTEYGELN  
AetMPK21-1 -----MHTHSHTSESEFFTEYGELN  
ScMPK21 -----MDPGKKTSESEFFTEYGELN  
HvMPK21(1H) -----MDPGKKTSESEFFTEYGELN  
TaMPK21-1(1BL) -----MDPGKKTSESEFFTEYGELN  
TaMPK21-1(1AL) -----MDPGKKTSESEFFTEYGELN  
TuMPK21-1 -----MDPGKKTSESEFFTEYGELN  
AKL80629.1 -----MDPGKKTSESEFFTEYGELN  
tplb0009k03 -----MDPGKKTSESEFFTEYGELN  
\* . : \* \*\*\*\*\*

IGxGxYGxV IKKIxxxF DAxRxLRE FxDIYxxxELM DLxxVI QxLRxLKYxH  
BAK08351.1 RYQVSEVIGKGSYGVVAAAIDTQTGERVAIKKINDVFDHVSDATRILREIKLLRLLRHPDIVQIKHIMLPPSRREFRDIYVVFELMESDLHQVIKANDDLTPEHHQFFLYQLLRGMKYIH  
TsMPK21-1(U)p RYQVSEVIGKGSYGVVAAAIDTQTGERVAIKKINDVFDHVSDATRILREIKLLRLLRHPDIVQIKHIMLPPSRREFRDIYVVFELMESDLHQVIKANDDLTPEHHQFFLYQLLRGMKYIH  
TaMPK21-1(1DL) RYQVSEVIGKGSYGVVAAAIDTQTGERVAIKKINDVFDHVSDATRILREIKLLRLLRHPDIVQIKHIMLPPSRREFRDIYVVFELMESDLHQVIKANDDLTPEHHQFFLYQLLRGMKYIH  
AetMPK21-1 RYQVSEVIGKGSYGVVAAAIDTQTGERVAIKKINDVFDHVSDATRILREIKLLRLLRHPDIVQIKHIMLPPSRREFRDIYVVFELMESDLHQVIKANDDLTPEHHQFFLYQLLRGMKYIH  
ScMPK21 RYQVSEVIGKGSYGVVAAAIDTQTGERVAIKKINDVFDHVSDATRILREIKLLRLLRHPDIVQIKHIMLPPSRREFRDIYVVFELMESDLHQVIKANDDLTPEHHQFFLYQLLRGMKYIH  
HvMPK21(1H) RYQVSEVIGKGSYGVVAAAIDTQTGERVAIKKINDVFDHVSDATRILREIKLLRLLRHPDIVQIKHIMLPPSRREFRDIYVVFELMESDLHQVIKANDDLTPEHHQFFLYQLLRGMKYIH  
TaMPK21-1(1BL) RYQVSEVIGKGSYGVVAAAIDTQTGERVAIKKINDVFDHVSDATRILREIKLLRLLRHPDIVQIKHIMLPPSRREFRDIYVVFELMESDLHQVIKANDDLTPEHHQFFLYQLLRGMKYIH  
TaMPK21-1(1AL) RYQVSEVIGKGSYGVVAAAIDTQTGERVAIKKINDVFDHVSDATRILREIKLLRLLRHPDIVQIKHIMLPPSRREFRDIYVVFELMESDLHQVIKANDDLTPEHHQFFLYQLLRGMKYIH  
TuMPK21-1 RYQVSEVIGKGSYGVVAAAIDTQTGERVAIKKINDVFDHVSDATRILREIKLLRLLRHPDIVQIKHIMLPPSRREFRDIYVVFELMESDLHQVIKANDDLTPEHHQFFLYQLLRGMKYIH  
AKL80629.1 RYQVSEVIGKGSYGVVAAAIDTQTGERVAIKKINDVFDHVSDATRILREIKLLRLLRHPDIVQIKHIMLPPSRREFRDIYVVFELMESDLHQVIKANDDLTPEHHQFFLYQLLRGMKYIH  
tplb0009k03 RYQVSEVIGKGSYGVVAAAIDTQTGERVAIKKINDVFDHVSDATRILREIKLLRLLRHPDIVQIKHIMLPPSRREFRDIYVVFELMESDLHQVGNKANDDLTPEHHQFFLYQLLRGMKYIH  
\*\*\*\*\*

HRDLKPxN LxNxNCxLKIxDFGLAR TRWYRAPEL IDxWSvGC  
BAK08351.1 AASVFHRDLKPKNILANADCKLKICDFGLARVSFNDGAPSAIFWTDYVATRWYRAPELCSFFSKYTPAIDIWSVGCIFAEMLTGKPLFPGKNVVHQLDLMTDVLGTTPSAESLAKIRNEK  
TsMPK21-1(U)p AASVFHRDLKPKNILANADCKLKICDFGLARVSFNDGAPSAIFWTDYVATRWYRAPELCSFFSKYTPAIDIWSVGCIFAEMLTGKPLFPGKNVVHQLDLMTDVLGTTPSAESLAKIRNEK  
TaMPK21-1(1DL) AASVFHRDLKPKNILANADCKLKICDFGLARVSFNDGAPSAIFWTDYVATRWYRAPELCSFFSKYTPAIDIWSVGCIFAEMLTGKPLFPGKNVVHQLDLMTDVLGTTPSAESLAKIRNEK  
AetMPK21-1 AASVFHRDLKPKNILANADCKLKICDFGLARVSFNDGAPSAIFWTDYVATRWYRAPELCSFFSKYTPAIDIWSVGCIFAEMLTGKPLFPGKNVVHQLDLMTDVLGTTPSAESLAKIRNEK  
ScMPK21 AASVFHRDLKPKNILANADCKLKICDFGLARVSFNDGAPSAIFWTDYVATRWYRAPELCSFFSKYTPAIDIWSVGCIFAEMLTGKPLFPGKNVVHQLDLMTDVLGTTPSAESLAKIRNEK  
HvMPK21(1H) AASVFHRDLKPKNILANADCKLKICDFGLARVSFNDGAPSAIFWTDYVATRWYRAPELCSFFSKYTPAIDIWSVGCIFAEMLTGKPLFPGKNVVHQLDLMTDVLGTTPSAESLAKIRNEK  
TaMPK21-1(1BL) AASVFHRDLKPKNILANADCKLKICDFGLARVSFNDGAPSAIFWTDYVATRWYRAPELCSFFSKYTPAIDIWSVGCIFAEMLTGKPLFPGKNVVHQLDLMTDVLGTTPSAESLAKIRNEK  
TaMPK21-1(1AL) AASVFHRDLKPKNILANADCKLKICDFGLARVSFNDGAPSAIFWTDYVATRWYRAPELCSFFSKYTPAIDIWSVGCIFAEMLTGKPLFPGKNVVHQLDLMTDVLGTTPSAESLAKIRNEK  
TuMPK21-1 AASVFHRDLKPKNILANADCKLKICDFGLARVSFNDGAPSAIFWTDYVATRWYRAPELCSFFSKYTPAIDIWSVGCIFAEMLTGKPLFPGKNVVHQLDLMTDVLGTTPSAESLAKIRNEK  
AKL80629.1 AASVFHRDLKPKNILANADCKLKICDFGLARVSFNDGAPSAIFWTDYVATRWYRAPELCSFFSKYTPAIDIWSVGCIFAEMLTGKPLFPGKNVVHQLDLMTDVLGTTPSAESLAKIRNEK  
tplb0009k03 AASVFHRDLKPKNILANADCKLKICDFGLARVSFNDGAPSAIFWTDYVATRWYRAPELCSFFSKYTPAIDIWSVGCIFAEMLTGKPLFPGKNVVHQLDLMTDVLGTTPSAESLAKIRNEK  
\*\*\*\*\*

MPK21-1 continued

LE<sup>R</sup>LLAFDPKDRPTAEAL

BAK08351.1 ARRYLSNMRRKKPKVPLTKKFPIDPMALHLLERLLAFDPKDRPTADEALTDPYFTGLANSEREP...
TsMPK21-1(U)p ARRYLSNMRRKKPKVPLTKKFPIDPMALHLLERLLAFDPKDRPTADEALTDPYFNGLANSEREP...
TaMPK21-1(1DL) ARRYLSNMRRKKPKVPLTKKFPIDPMALHLLERLLAFDPKDRPTADEALTDPYFTGLANSEREP...
AetMPK21-1 ARRYLSNMRRKKPKVPLTKKFPIDPMALHLLERLLAFDPKDRPTADEALTDPYFTGLANSEREP...
ScMPK21 ARRYLSNMRRKKPKVPLTKKFPIDPMALHLLERLLAFDPKDRPTADEALTDPYFNGLANSEREP...
HvMPK21(1H) ARRYLSNMRRKKPKVPLTKKFPIDPMALHLLERLLAFDPKDRPTADEALTDPYFTGLANSEREP...
TaMPK21-1(1BL) ARRYLSNMRRKKPKVPLTKKFPIDPMALHLLERLLAFDPKDRPTADEALTDPYFTGLANSEREP...
TaMPK21-1(1AL) ARRYLSNMRRKKPKVPLTKKFPIDPMALHLLERLLAFDPKDRPTADEALTDPYFNGLANSEREP...
TuMPK21-1 ARRYLSNMRRKKPKVPLTKKFPIDPMALHLLERLLAFDPKDRPTADEALTDPYFNGLANSEREP...
AKL80629.1 ARRYLSNMRRKKPKVPLTKKFPIDPMALHLLERLLAFDPKDRPTADEALTDPYFTGLANSEREP...
tplb0009k03 ARRYLSNMRRKKPKVPLTKKFPIDPMALHLLERLLAFDPKDRPTADEALTDPYFTGLANSEREP...
\*\*\*\*\*:\*\*\*\*\*:\*\*\*:\*\*\*\*\* . . :

BAK08351.1 ANRWAASRGRWRYPAFRRRSHRHRWRWPQEALRTQGKSRSPRTADRRPAPHRWARKARSTGASLAARQRHRRRSRSSRSSSSSTRSPAGRSVSRTAWARRGRSSPSRASLPSP
TsMPK21-1(U)p
TaMPK21-1(1DL) SF-----MYPGVDVDFKQ--QFAHLEK--GGAKGEKSSP-QLRQNASLPRERA-----IGNKHGSD-----YQVKLNTGKPVHASV-----TDGISKPLMSA-----
AetMPK21-1 SF-----MYPGVDVDFKQ--QFAHLEK--GGAKGEKSSP-QLRQNASLPR--A-----IGNKHGSD-----YQVKLNTGKPVHASV-----TDGISKPLMSA-----
ScMPK21 SF-----MYPGVDVDFKQ--QFAHLEK--GGAKGEKSSP-QLRQNASLPRERA-----IGNKHGSD-----YQVKLNTGKPVHASV-----TDGISKPLMSA-----
HvMPK21(1H) SF-----MYPGVDVDFKQ--QFAHLEK--GGAKGDKSSP-QLRQNASLPRERA-----IGNKHGSD-----YQVKLNTGKPVHASV-----TDGISKPLMSA-----
TaMPK21-1(1BL) SF-----MYPGVDVDFKQ--QFAHLEK--GGAKGEKASP-QLRQNASLPRERA-----IGNKHGSD-----YQVKLNTGKPVHASV-----TDGISKPLMSA-----
TaMPK21-1(1AL) SF-----MYPGVDVDFKQ--QFAHLEK--GGAKGEKSSP-QLRQNASLPRERA-----IGNKHGSD-----YQVKLNAGEKPVHASV-----TDGISKPLMSA-----
TuMPK21-1 SF-----MYPGVDVDFKQ--QFAHLEK--GGAKGEKSSP-QLRQNASLPRERA-----IGNKHGSD-----YQVKLNAGEKPVHASV-----TDGISKPLMSA-----
AKL80629.1 SF-----MYPGVDVDFKQ--QFAHLEK--GGAKGEKSSP-QLRQNASLPRERA-----IGNKHGSD-----YQVKLNTGKPVHASV-----TDGISKPLMSA-----
tplb0009k03 SF-----MYPGVDVDFKQ--QFAHLEK--GGAKGEKSSP-QLRQNASLPRERA-----IGNKHGSD-----YQVKLNTGKPVHASV-----TDGISKPLMSA-----

BAK08351.1 SSGASRRPSSRRSWAPCSRRTAATSCGWPRRSAPTGGSSRAG\*----
TsMPK21-1(U)p
TaMPK21-1(1DL) ---RSLKSETMSASKCIGEIKNKDDEYESVDAADGVSQKVAQLKT\*
AetMPK21-1 ---RSLKSETMSASKCIGEIKNKDDEYESVDAADGVSQKVAQLKT\*
ScMPK21 ---RSLKSETMSASKCIGEIKNKDDEYESVDAADGVSQKIAQLKT\*
HvMPK21(1H) ---RSLKSETMSASKCIGEIKNKDDEYESVDAADGVSQKIAQLKT\*
TaMPK21-1(1BL) ---RSLKSETMSASKCIGEVKNKDDEYESVDAADGVSQKVAQLKT\*
TaMPK21-1(1AL) ---RSLKSETMSASKCIGEIKNKDDEYESVDAADGVSQKIAQLKT\*
TuMPK21-1 ---RSLKSETMSASKCIGEIKNKDDEYESVDAADGVSQKIAQLKT\*
AKL80629.1 ---RSLKSETMSASKCIGEIKNKDDEYESVDAADGVSQKVAQLKT\*
tplb0009k03 ---RSLKSETMSASKCIGEVKNKDDEYESVDAADGVSQKVAQLKT\*





MPK24

HvMPK24 (6H) MEFFTEYGEASQYQIKEI **IGxGxYGxV** **IKKIxxxF** **DAxRxLRE** **FxDIYxxxELM** **DLxxVI** IHGKSGFVVAADVDTQTGEVVAIKKIHDMEFEHASDGTRILREIKLLRLLRHPNIVEIKHILLPPARREFRDIYVVFELMESDLQKVIQVNDNLTKGHHRFFL  
 TaMPK24 (6BS) MEFFTEYGEASQYQIEEI IGQGSFGVVAADVDTQTGERVAIKKIHDMEFEHADPDGTRILREIKLLRLLRHPNIVGVKHILLPPARREFRDIYVVFELMESDLQKVIQVNEENLTAGHHRFFL  
 AK334728.1 MEFFTEYGEASQYQIEEI IGQGSFGVVAADVDTQTGERVAIKKIHDMEFEHADPDGTRILREIKLLRLLRHPNIVGVKHILLPPARREFRDIYVVFELMESDLQKVIQVNEENLTAGHHRFFL  
 ScMPK24 MEFFTEYGEASQYQIKEI IGRGSFGVVAADVDTQTGERVAIKKIHDMEFEHASDGTRILREIKLLRLLRHPNIVEIKHILLPPARREFRDIYVVFELMESDLQKVMQVNEENLSADHHRFFL  
 TaMPK24 (U) MEFFTEYGEASQYQIEEI IKGSGFVVAADVDTQTGERVAIKKIHDMEFEHASNGTRILREIKLLRLLRHPNIVETKHILLPPARREFRDIYVVFELMESDLQKVIQANENLTAGHHRFFL  
 TsMPK24 (U) MEFFTEYGEASQYQIEEI IGRGSFGVVAADVDTQTGERVAIKKIHDMEFEHASDGTRILWEIKLLRLLRHPNIVEIKHILLPPARREFRDIYVVFELMESDLQKVIQVNEENLTAGHHRFFL  
 TuMPK24 MEFFTEYGEASQYQIEEI IKGSGFVVAADVDTQTGERVAIKKIHDMEFEHASNGTRILREIKLLRLLRHPNIVETKHILLPPARREFRDIYVVFELMESDLQKVIQANENLTAGHHRFFL  
 TaMPK24 (6DS) MEFFTEYGEASQYQIEEI IGRGSFGVVAADVDTQTGERVAIKKIHDMEFEHASDGTRILWEIKLLRLLRHPNIVEIKHILLPPARREFRDIYVVFELMESDLQKVMQVNEENLTAGHHRFFL  
 AetMPK24 MEFFTEYGEASQYQIEEI IGRGSFGVVAADVDTQTGERVAIKKIHDMEFEHASDGTRILWEIKLLRLLRHPNIVEIKHILLPPARREFRDIYVVFELMESDLQKVMQVNEENLTAGHHRFFL  
 \*\*\*\*\*:\*\*\*\*:\*\*\*\*\* \*\*\*\*\* \*\*\*\*\* \*\*\*\*\*:\*\*\*\*\*:\*\*\*\*:\*\*\*\*\*

**QxLRxLKYxH** **HRDLKPxN** **LxNxNCxLKIxDFGLAR** **TRWYRAPEL** **IDxWS<sup>v</sup>GC**  
 HvMPK24 (6H) YQLLHALKYIHAAN **VFHRDLKPSNILANSN**CKLKI CDFGLARASRDDVPSAIFWTDYVATRWYRAPEL CGSFFSKYTPAIDIWSIGCIFAEVLTNRNPLFPGTNVTHQLDLITDVLGTPSH  
 TaMPK24 (6BS) YQLLHALKYIHAAN **VFHRDLKPSNILANSN**CKLKI CDFGLARALRDDAPLAIFWTDYVATRWYRAPEL CGSFFSKYTPAIDIWSIGCIFAEVLTGKPLFPGMNVTHQLDLITNVLGTPSY  
 AK334728.1 YQLLHALKYIHAAN **VFHRDLKPSNILANSN**CKLKI CDFGLARALRDDAPLAIFWTDYVATRWYRAPEL CGSFFSKYTPAIDIWSIGCIFAEVLTGKPLFPGMNVTHQLDLITNVLGTPSY  
 ScMPK24 YQLLAALKYIHAAN **VFHRDLKPSNILVNSN**CKLKI CDFGLARPLCDDAPLAIFWTDYVATRWYRAPEL CGSFFSKYTPAIDIWSIGCIFAEVLTRKPLFPGRNGTHQLDLI-TILGNPSC  
 TaMPK24 (U) YQLLHALKYIHAAN **VFHRDLKPSNILVNSN**CKLKI CDFGLARASRDDPPLAIFWTDYVATRWYRAPEL CGSFFSKYTPAIDIWSIGCIFAEVLTGKPLFPGRNGTHQLDLITDVLGTPSY  
 TsMPK24 (U) YQLLHALKYIHAAN **VFHRDLKPSNILVNSN**CKLKI CDFGLARPL-DDAPLAIFWTDYVATRWYRAPEL CGSFFSKYTPAIDIWSIGCIFAEVLTGKPLFPGRNGTHQLDLITDVLGNPSC  
 TuMPK24 YQLLHALKYIHAAN **VFHRDLKPSNILVNSN**CKLKI CDFGLARASRDDPPLAIFWTDYVATRWYRAPEL CGSFFSKYTPAIDIWSIGCIFAEVLTRKPLFPGTNVKHQLDLITDVLGTPSY  
 TaMPK24 (6DS) YQLLHALKYIHAAN **VFHRDLKPSNILVNSN**CKLKI CDFGLARASRDDPPLAIFWTDYVATRWYRAPEL CGSFFSKYTPAIDIWSIGCIFAEVLTRKPLFPGTNVKHQLDLITDVLGTPSH  
 AetMPK24 YQLLHALKYIHAAN **VFHRDLKPSNILVNSN**CKLKI CDFGLARASRDDPPLAIFWTDYVATRWYRAPEL CGSFFSKYTPAIDIWSIGCIFAEVLTRKPLFPGTNVKHQLDLITDVLGTPSH  
 \*\*\*\*\* \*\*\*\*\*:\*\*\*\*:\*\*\*\*\* \*\*\*\*\* \*\*\*\*\* \*\*\*\*\*:\*\*\*\*\*:\*\*\*\*:\*\*\*\*\*

**LE<sup>R</sup>LLAFDPKDRPTAEAL**  
 HvMPK24 (6H) ETLSQIRNEKARYLTGMKRKHP I PFPRMFC SADPQAVRLLERLLAFDPKDRPTAEALADPYFEGFLPKLEHEPSYPFSKLDFFERWKL SKDGI RDLIYQEILEYHPQMLQDYIRGGG  
 TaMPK24 (6BS) ETLSQIRNEKARYLTGMKRKHP I PFPSIFCNADPQAVRLLERLLAFDPKDRPTAEALADPYFEGFPNLEHEPSHPF SKLEFEFERWKLTKDGV RDLIYREILEYHPQMLQDYIRAGG  
 AK334728.1 ETLSQIRNEKARYLTGMKRKHP I PFPSIFCNADPQAVRLLERLLAFDPKDRPTAEALADPYFEGFPNLEHEPSHPF SKLEFEFERWKLTKDGV RDLIYREILEYHPQMLQDYIRAGG  
 ScMPK24 ETLSQIRNEKARYLTGMKRKHP I PFASMF CNADPKAVRLLERLLAFDPKDRPTAEALADPYFEGFLRKL EHEPLPHPF SKLEFEFERLKLTKGGV RDLIYREILEYHPQMLQDYIRAGG  
 TaMPK24 (U) ETLSQIRNEKARIYLTGMKRKHP I PFASMF CNADPQAVRLLERLLAFDPKDRPTAEALADPYFEGFPNLEHEPSHPF SKLEFEFERWKLTKDGI RDLIYREILEYHPQMLQDYIGAGG  
 TsMPK24 (U) ETLSQIRNEKARYLTGMKRKHP I PFASVFCNADPKAVRLLERLLAFDPKDRPTAEALADPYFEGFLRKL EHEPLPHPF SKLEFEFERLKLTKGGV RDLIYREILEYHPQMLQDYIRAGG  
 TuMPK24 ETLSQIRNEKARIYLTGMKRKHP I PFPSMF CNADPQAVRLLERLLAFDPKDRPTAEALADPYFEGFPNLEHEPSHPF SKLEFEFERWKLTKDGI RDLIYREILEYHPQMLQDYIGAGG  
 TaMPK24 (6DS) ETLSQIRNEKARYLTGMKRKHP I PFPSMF CNADPQAVRLLERLLAFDPKDRPTAEALADPYFEGFPNLEHEPSHPF SKLEFEFERWKLTKDGI RDLIYREILEYHPQMLQDYIRAGG  
 AetMPK24 ETLSQIRNEKARYLTGMKRKHP I PFPSMF CNADPQAVRLLERLLAFDPKDRPTAEALADPYFEGFPNLEHEPSHPF SKLEFEFERWKLTKDGI RDLIYREILEYHPQMLQDYIRAGG  
 \*\*\*\*\* \*\*\*\*\*:\*\*\*\*:\*\*\*\*\* \*\*\*\*\* \*\*\*\*\* \*\*\*\*\*:\*\*\*\*\*:\*\*\*\*:\*\*\*\*\*

**MPK24 continued**

HvMPK24 (6H) QTSFVYPSGVDGMRLQFAHAEDKYLRGERGT-PLRRRHASLPRERFRAPMGSDNQDCNNENRRTASSAGQIIIRPQQVGMTHAYVYQNGTGIPDFCSGYLQNGGTSASSCAIGENEGPK  
TaMPK24 (6BS) QTSFVYPSGVDGMRLQFVHLEENHLRGERGT-PLRRRHASLPRERVCAPMGIDNQDCNNERR-TASSAAQITIRSQQEGLTHAYVYQNGTGIPDFCSGYLQNGGTSASSCVIEENEGPK  
AK334728.1 QTSFVYPSGVDGMRLQFVHLEENHLRGERGT-PLRRRHASLPRERVCAPMGIDNQDCNNERR-TASSAAQITIRSQQEGLTHAYVYQNGTGIPDFCSGYLQNGGTSASSCVIEENEGPK  
ScMPK24 QTSFVYPSGVDGMRLQFVHLEENHLRGERGTTTPPQRRHASLPRERVCTPMGSDKHDCNNENRRTASSAAQTIIRSQQGGLTHAYVNQNGTSPNFCSGYLQNGSASASSCVIEENEGPK  
TaMPK24 (U) QTSFVYPSGVDGMRLQFVHLEENHLRGERGT-PLRRRHASLPRERVCAPKGSNDQDCNNENRRTASSAAQTTIRSQQEGLTHAYVYQNGTSPNFCSGYLQNGGTSASSCVIEENEGLE  
TsMPK24 (U) QTSFVYPSGVDGMRLQFVHLEENHLRGERGT-PLRRRHASLPRERVCAPKGSNDQDCNNENRRTASSAAQTTIRSQQEGLTHAYVYQNGTSPNFCSGYLQNGGTSASSCVIEENEGLE  
TuMPK24 QTSFVYPSGVDDMRLQFVHLEENHLRGERGT-PLRRRHASLPRERVCAPKGSNDQDCNNENRRTASSAAQTTIRSQQEGLTHAYVYQNGTSPNFCSGYLQNGGTSASSCVIEENEGLE  
TaMPK24 (6DS) QTSFVYPSGVDDMRLQFVHLEENHLRGERGT-PLRRRHASLPRERVCAPKGSNDQDCNNENRRTASSAAQTTIRSQQEGLTHAYVYQNGTSPNFCSGYLQNGGTSASSCVIEENEGLE  
AetMPK24 QTSFVYPSGVDDMRLQFVHLEENHLRGERGI-----DRERVCAPKGSNDQDCNNENRRTASSAAQTTIRSQQEGLTHAYVYQNGTSPNFCSGYLQNGGTSASSCVIEENEGLE  
\*\*\*\*\*.\*\*\*\*\*\*.\* \*:::\*\*\*\*\* \*\*.\*.\* \*\* \*\* \*::\*\*\*\*\* \*\*\*\*\*.\*::\*\*\*\*\*.\*:\* \*\*.\*.\*::\*\*

HvMPK24 (6H) ENGVSEEEKVAYEPSELLAKI \*  
TaMPK24 (6BS) ENGVSA-EKVAYELSERLARI \*  
AK334728.1 ENGVSA-EKVAYELSERLARI \*  
ScMPK24 ENGVPEEEKVAYELSERLARI \*  
TaMPK24 (U) ENGVSEEEKVAYELSQC FARI \*  
TsMPK24 (U) ENGVSEEEKVAYELSERLARI \*  
TuMPK24 ENGVSEEEKVAYELSQC FARI \*  
TaMPK24 (6DS) ENGVSEEEKVAYELSQC FARI \*  
AetMPK24 ENGVSEEEKVAYELSQC FARI \*  
\*\*\*\* \*\*\*\*\* \*:::\*\*\*
