# Supplementary material for: Analysis of MAPK and MAPKK gene families in wheat and related Triticeae species
Source: PubMed Central journal article supplement (PMC5838963; doi:10.1186/s12864-018-4545-9), 2018-03-05
Supplement: 12864_2018_4545_MOESM8_ESM.pdf [file 12864_2018_4545_MOESM8_ESM.pdf]

**Additional File 8. Alignment and domain analysis of Triticeae MKKs.** The amino acid sequences from multiple genomic copies, along with the accessions reported in Additional File 3, of all Triticeae MKKs identified were aligned in Clustal Omega ([www.ebi.ac.uk/Tools/msa/clustalo/](http://www.ebi.ac.uk/Tools/msa/clustalo/)) under default settings. A lower case 'p' next to the gene name indicates that only a partial sequence was identified for the given gene. The protein kinase domain is in black font, and the N- and C-terminal extensions in teal font. Missing sequence information, namely 'X' residues, are shown in pink font. Highlighted sequences are the ATP binding signature (blue) which carries the P-loop consensus sequence (GxGxxG), the catalytic C-loop (red) with the DΨK consensus (where Ψ refers to the aliphatic amino acids L/I/V, but not M), the activation T-loop (black), NTF2 domain (pink). Sequence deviations from the S/TxxxxS/T activation loop of plant MKKs are marked in yellow font. Other deviations from consensus are highlighted in yellow. An asterix indicates a stop codon.





**MKK3**

GxGxxxG

|                |                                                                                               |                           |
|----------------|-----------------------------------------------------------------------------------------------|---------------------------|
| TaMKK3 (3B)p   | -----                                                                                         |                           |
| TuMKK3p        | -----                                                                                         |                           |
| HvMKK3-3 (6H)  | MAGLEELKRRLQPIFFDADGNVPPPAADGTHDDSSDDCEVTLDGGTVNLLSRSSDEYNI SKLGFHKRTRPDGDYATDKAYRCSCHDMHIFDS | VGNGASSVVHRAIYVPVHRVLALKK |
| TaMKK3-3 (5AL) | MAGLEDLKRRLQPIFFDADGNVPPPAADGTSDDSSDDCEV-LDSGTVNLLSRSSDEYNI SKLGFHKRTRPDGDYATDKAYRCSCHDMHIFDS | VGIGASSVVHRAIYVPVHRVLALKK |
| TuMKK3-3       | MAGLEDLKRRLQPIFFDADGNVPPPAADGTSDDSSDDCEV-LDSGTVNLLSRSSDEYNI SKLGFHKRTRPDGDYATDKAYRCSCHDMHIFDS | VGIGASSVVHRAIYVPVHRVLALKK |
| TaMKK3-3 (5BL) | MAGLEDLKRRLQPIFFDADGNVPPPAADGTSDDSSDDCEV-LDSGTVNLLSRSSDEYNI SKLGFHKRTRPDGDYATDKAYRCSCHDMHIFDS | VGNGASSVVYRAIYVPVHRVLALKK |
| TsMKK3-3 (U)   | MAGLEDLKRRLQPIFFDADGNVPPPAADGTSDDSSDDCEV-LDSGTVNLLSRSSDEYNI SKLGFHKRTRPDGDYATDKAYRCSCHDMHIFDS | VGNGASSVVHRAIYVPVHRVLALKK |
| ScMKK3-3       | MAGLEELKRRLQPIFFDADGNVPPPAADGTSDDSSDDCEV-LDGGTVNLLSRSSDEYNI SKLGFHKRTRPDGDYATDKAYRCSCHDMHIFDS | VGNGASSVVHRAIYVPVHRVLALKK |
| TaMKK3-3 (5DL) | MAGLEELKRRLQPIFFDADGNVPPPAADGTSDDSSDDCEV-LDGGTVNLLSRSSDEYNI SKLGFHKRTRPDGDYATDKAYRCCCHDMHIFDS | VGNGASSVVHRAIYVPVHRVLALKK |
| TsMKK3-2 (U2)p | MSGLEELKKKLQPLLFDDTDKGGVSTRV---FPEDTCDSYVSDGGTINLLSRSFGEYNINEHGFHKRSTGPEEPDSGEKAYRCASEDMHIFGP | IGNGASSVVQRAIFIPVHRILALKK |
| BAJ96085.1     | -----MKVSDGGTINLLSRSFGEYNINEHGFHKRSTGPEEPDTGEKAYRCASEDMHIFGP                                  | IGNGASSVVQRAIFIPVHRILALKK |
| AKS50325.1     | MAGLEELKKKLQPLLFDDSDKGGVSTRV---FPEDTCDSYVSDGGTINLLSRSFGEYNINEHGFHKRSTGPEEPDTGEKAYRCASEDMHIFGP | IGNGASSVVQRAIFIPVHRILALKK |
| TuMKK3-2       | MSGLEELKKKLQPLLFDDTDKGGVSTRV---FPEDTCDSYVSDGGTINLLSRSFGEYNINEHGFHKRSTGPEEPDTGEKAYRCASEDMHIFGP | IGNGASSVVQRAIFIPVHRILALKK |
| ScMKK3-1       | MSGLEELKKKLQPLLFDDSDKGGVSTRV---FPEDTCDSYVSDGGTINLLSRSFGEYNINEHGFHKRSTGPEEPDTGEKAYRCASEDMHIFGP | IGNGASSVVQRAIFIPVHRILALKK |
| TsMKK3-2 (U1)  | MAGLEELKKKLQPLLFDDSDKGGVSTRV---FPEDTCDSYVSDGGTINLLSRSFGEYNINEHGFHKRSTGPEEPDTGEKAYRCASEDMHIFGP | IGSGASSVVQRAIFIPVHRILALKK |
| HvMKK3-2 (5H)  | MAGLEELKKKLQPLLFDDSDKGGVSTRV---FPEDTCDSYVSDGGTINLLSRSFGEYNINEHGFHKRSTGPEEPDTGEKAYRCASEDMHIFGP | IGNGASSVVQRAIFIPVHRILALKK |
| BAU62004.1     | MAGLEELKKKLQPLLFDDSDKGGVSTRV---FPEDTCDSYVSDGGTINLLSRSFGEYNINEHGFHKRSTGPEEPDTGEKAYRCASEDMHIFGP | IGNGASSVVQRAIFIPVHRILALKK |
| TaMKK3-2 (5BL) | MAGLEELKKKLQPLLFDDSDKGGVSTRV---FPEDTCDSYVSDGGTINLLSRSFGEYNINEHGFHKRSTGPEEPDTGEKAYRCASEDMHIFGP | IGSGASSVVQRAIFIPVHRILALKK |
| TsMKK3-2 (B)   | MAGLEELKKKLQPLLFDDSDKGGVSTRV---FPEDTCDSYVSDGGTINLLSRSFGEYNINEHGFHKRSTGPEEPDTGEKAYRCASEDMHIFGP | IGSGASSVVQRAIFIPVHRILALKK |
| AetMKK3-2      | MAGLEELKKKLQPLLFDDSDKGGVSTRV---FPEDTCDSYVSDGGTINLLSRSFGEYNINEHGFHKRSTGPEEPDTGEKAYRCASEDMHIFGP | IGSGASSVVQRAIFIPVHRILALKK |
| TaMKK3-2 (5DL) | MSGLEELKKKLQPLLFDDSDKGGVSTRV---FPEDTCDSYVSDGGTINLLSRSFGEYNINEHGFHKRSTGPEEPDTGEKAYRCASEDMHIFGP | IGNGASSVVQRAIFIPVHRILALKK |

MKK3 continued

DΨK

TaMKK3(3B)p -----KIADFGV SAGLD  
 TuMKK3p -----KIADFGV SAGLD  
 HvMKK3-3(5H) INIFEKEKRQQILNEIRTLAASCYPGLVEFQGVFYTPDSGEIYFALEYMDGGSLADIRVKKFITEPVLSHMLQKVLLALRYLHEVRRLVHRDIKPANLLLNLKGDTKITDFGVTSGLH  
 TaMKK3-3(5AL) ISIFDKEKRQQILNEITTLAASCYPGLVEFQGFYTPDSGEIYFALEYMDGGSLADIRVKKFITEPVLSHMLQKVLLALRYLHEVRRLVHRDIKPANLLLNLKRDTKITDFGVTSGLH  
 TuMKK3-3 ISIFDKEKRQQILNEITTLAASCYPGLVEFQGFYTPDSGEIYFALEYMDGGSLADIRVKKFITEPVLSHMLQKVLLALRYLHEVRRLVHRDIKPANLLLNLKGDTKITDFGVTSGLH  
 TaMKK3-3(5BL) INIFDKERRQQILNEIRTLAASCYPGLVEFQGVFYTPDSGEIYFALEYMDGGSLADIRVKKFITEPVLSHMLQKVLLALRYLHEVRRLVHRDIKPANLLLNLKGDTKITDFGVTSGLH  
 TsMKK3-3(U) INIFDKERRQQILNEIRTLAASCYPGLVEFQGVFYTPDSGEIYFALEYMDGGSLADIRVKKFITEPVLSHMLQKVLLALRYLHEVRRLVHRDIKPANLLLNLKGDTKITDFGVTSGLH  
 ScMKK3-3 IN-FEKEKRQQILNEIRTLAASCYPGLVEFQGVFYTPDSGEIYFALEYMDGGSLADIRVKKFITEPVLSHMLQKVLLALRYLHEVRRLVHRDIKPANLLLNLKGDTKITDFGVTSGLH  
 TaMKK3-3(5DL) INIFDKEKRQQILNEIRTLAASCYPGLVEFQGVFYTPDSGEIYFALEYMDGGSLADIRVKKFITEPVLSHMLQKVLLALRYLHEVRRLVHRDIKPANLLLNLKGDTKITDFGVSSGLH  
 TsMKK3-2(U2)p INIFEKEKRQQILNEMRTLCEASCYPGLVEFQGFYMPDSGQISIALEYMDGGSLADVIRVKKSIPEPVLAHMLLKVLLGLKYLHEVRHLVHRDLKPANILVNLKGEAKITDFGV SAGLD  
 BAJ96085.1 INIFEKEKRQQILNEMRTLCEASCYPGLVEFQGFYMPDSGQISIALEYMDGGSLADVIRVKKSIPEPVLAHMLLKVLLGLKYLHEARHLVHRDLKPANILVNLKGEAKITDFGV SAGLD  
 AKS50325.1 INIFEKEKRQQILNEMRTLCEASCYPGLVEFQGFYMPDSGQISIALEYMDGGSLADVIRVKKSIPEPVLAHMLQKVLLGLKYLHEVRHLVHRDLKPANLLVNLKGEAKITDFGV SAGLD  
 TuMKK3-2 INIFEKEKRQQILNEMRTLCEASCYPGLVEFQGFYMPDSGQISIALEYMDGGSLADVIRVKKSIPEPVLAHMLQKVLLGLKYLHEVRHLVHRDLKPANLLVNLKGEAKITDFGV SAGLD  
 ScMKK3-1 INIFEKEKRQQILNEMRTLCEASCYPGLVEFQGFYMPDSGQISIALEYMDGGSLADVIRVKKSIPEPVLAHMLLKVLLGLKYLHEVRHLVHRDLKPANILVNLKGEAKITDFGV SAGLD  
 TsMKK3-2(U1) INIFEKEKRQQILNEMRTLCEASCYPGLVEFQGFYMPDSGQISIALEYMDGGSLADVIRVKKSIPEPVLAHMLLKVLLGLKYLHEVRHLVHRDLKPANILVNLKGEAKITDFGV SAGLD  
 HvMKK3-2(5H) INIFEKEKRQQILNEMRTLCEASCYPGLVEFQGFYMPDSGQISIALEYMDGGSLADVIRVKKSIPEPVLAHMLLKVLLGLKYLHEARHLVHRDLKPANILVNLKGEAKITDFGV SAGLD  
 BAU62004.1 INIFEKEKRQQILNEMRTLCEASCYPGLVEFQGFYMPDSGQISIALEYMDGGSLADVIRVKKSIPEPVLAHMLLKVLLGLKYLHEARHLVHRDLKPANILVNLKGEAKITDFGL SAGLD  
 TaMKK3-2(5BL) INIFEKEKRQQILNEMRTLCEASCYPGLVEFQGFYMPDSGQISIALEYMDGGSLADVIRVKKSIPEPVLAHMLLKVLLGLKYLHEVRHLVHRDLKPANILVNLKGEAKITDFGV SAGLD  
 TsMKK3-2(B) INIFEKEKRQQILNEMRTLCEASCYPGLVEFQGFYMPDSGQISIALEYMDGGSLADVIRVKKSIPEPVLAHMLLKVLLGLKYLHEVRHLVHRDLKPANILVNLKGEAKITDFGV SAGLD  
 AetMKK3-2 INIFEKEKRQQILNEMRTLCEASCYPGLVEFQGFYMPDSGQISIALEYMDGGSLADVIRVKKSIPEPVLAHMLLKVLLGLKYLHEVRHLVHRDLKPANILVNLKGEAKITDFGV SAGLD  
 TaMKK3-2(5DL) INIFEKEKRQQILNEMRTLCEASCYPGLVEFQGFYMPDSGQISIALEYMDGGSLADVIRVKKSIPEPVLAHMLLKVLLGLKYLHEVRHLVHRDLKPANILVNLKGEAKITDFGV SAGLD

MKK3 continued

TaMKK3 (3B)p -----PDARPTCEQLLSHPFIKRYEEAGVDLAAYV  
TuMKK3p GTMAMRATFVGTVTYMLPERIRGDNLYAADIWSLGLTVLECATGKFPYDFSEGPTNLMLQILDDPSPTPPEDAYSPEFRSFIDDCLQKEPDARSTCEQLLSHPFIKRYEEAGVDLAAYV  
HvMKK3-3 (5H) DSITMCATFLGSVTYMSPERIRNENYSYAADIWSLGLTALECATGRYPYDVSGGEADLMLQILEDPSPTPPQHMHSEEFCSFIDACLQKDADARPTCDQLLSHAFIKKYEKPGVDLAEYN  
TaMKK3-3 (5AL) DSVTMCATFLGSVTYMSPERIRNENYSYAADIWSLGLTALECATGRYPYDVNGGEADLMLQILEDPSPTPPQHMHSEEFCSFIDACLQKDADARPTCNELLSHSFIKRYEGPGVDLAEYN  
TuMKK3-3 DSVTMCATFLGSVTYMSPERIRNENYSYAADIWSLGLTALECATGRYPYDVNGGEADLMLQILEDPSPTPPQHMHSEEFCSFIDACLQKDADARPTCNELLSHSFIKRYEGPGVDLAEYN  
TaMKK3-3 (5BL) DSVTMCATFLGSVTYMSPERIRNENYSYAADIWSLGLTALECATGRYPYDVNGGEADLMLQILEDPSPTPPQHMHSEEFCLFIDACLQKDADARPTCDELLSHSFIKRYEGPGVDLAEYN  
TsMKK3-3 (U) DSVTMCATFLGSVTYMSPERIRNENYSYAADIWSLGLTALECATGRYPYDVSGGEADLMLQILEDPSPTPPQHMHSEEFCSFIDACLQKDADARPTCDELLSHSFIKRYEGPGVDLAEYN  
ScMKK3-3 DSVTMCTTFLGSVTYMSPERIRNENYSYAADIWSLGLTALECATGRYPYDVSGGEADLMLQILEDPSPTPPQHMHSEEFCSFIDACLQKDADARPTCDQLLSHAFIKKYEKPGVDLAEYN  
TaMKK3-3 (5DL) DSVTMCATFLGSVTYMSPERIRNENYSYAADIWSLGLTALECATGRYPYDVNGGEADLMLQILEDPSPTPPQHMHSEEFCSFIDACLQKDADARPTCDQLLSHAFIKKYEKPGVDLAEYN  
TsMKK3-2 (U2)p NTMAMCATFVGTVTYMSPERIRNENYSYAADIWSLGLTILECATGKFPYVNEGPANLMLQILDDPSAPPADGYTPEFCSFINDCLRKDADARPTCEQLLSHAFIKRYEQTGVDLAAYV  
BAJ96085.1 NTMAMCATFVGTVTYMSPERIRNENYSYAADIWSLGLTILECATGKFPYVNEGPANLMLQILDDPSAPPEDAYTPEFCSFINDCLRKDADARPTCEQLLSHPFIKRYEETRVDLAAYV  
AKS50325.1 NTMAMCATFVGTVTYMSPERIRNENYSYAADIWSLGLTILECATGKFPYVNEGPANLMLQILDDPSPTPPEDAYTPEFCSFINDCLRKDADARPTCEQLLSHPFIKRYEQTGVDLAAYV  
TuMKK3-2 NTMAMCATFVGTVTYMSPERIRNENYSYAADIWSLGLTILECATGKFPYVNEGPANLMLQILDDPSPTPPEDAYTPEFCSFINDCLRKDADARPTCEQLLSHAFIKRYEQTGVDLAAYV  
ScMKK3-1 NTMAMCATFVGTVTYMSPERIRNENYSYAADIWSLGLTILECATGKFPYVNEGPANLMLQILDDPSAPPADGYTPEFCSFINDCLRKDADTRPTCEQLLSHPFIKRYEPTGVDLAAYV  
TsMKK3-2 (U1) NTMAMCATFVGTVTYMSPERIRNENYSYAADIWSLGLTILECATGKFPYVNEGPANLMLQILDDPSAPPEDAYTPEFCSFINDCLRKDADARPTCEQLLSHPFIKRYEPTGVDLAAYV  
HvMKK3-2 (5H) NTMAMCATFVGTVTYMSPERIRNENYSYAADIWSLGLTILECATGKFPYVNEGPANLMLQILDDPSAPPEDAYTPEFCSFINDCLRKDADARPTCEQLLSHPFIKRYEETGVDLAAYV  
BAU62004.1 NTMAMCATFVGTVTYMSPERIRNENYSYAADIWSLGLTILECATGKFPYVNEGPANLMLQILDDPSAPPEDAYTPEFCSFINDCLRKDADARPTCEQLLSHPFIKRYEETRVDLAAYV  
TaMKK3-2 (5BL) NTMAMCATFVGTVTYMSPERIRNENYSYAADIWSLGLTILECATGKFPYVNEGPANLMLQILDDPSAPPEDAYTPEFCSFINDCLRKDADARPTCEQLLSHPFIKRYEQTGVDLAAYV  
TsMKK3-2 (B) NTMAMCATFVGTVTYMSPERIRNENYSYAADIWSLGLTILECATGKFPYVNEGPANLMLQILDDPSAPPEDAYTPEFCSFINDCLRKDADARPTCEQLLSHPFIKRYEQTGVDLAAYV  
AetMKK3-2 NTMAMCATFVGTVTYMSPERIRNENYSYAADIWSLGLTILECATGKFPYVNEGPANLMLQILDDPSAPPEDAYTPEFCSFIKDCLWKDADARPTCEQLLSHPFIKRYEQTGVDLAAYV  
TaMKK3-2 (5DL) NTMAMCATFVGTVTYMSPERIRNENYSYAADIWSLGLTILECATGKFPYVNEGPANLMLQILDDPSAPPEDAYTPEFCSFINDCLRKYADARPTCEQLLSHPFIKRYEQTGVDLAAYV  
\*:\* \*\*:\*\*\*\*\* \*\*:\* \*\* \* \* \*

MKK3 continued

TaMKK3(3B)p GGVVDPTESLKQ IAEMLAVHYLLFNGSDGSWNHMKTLMEESSFSFLGNVCVEQSVIFDTLSTIRNKCLKGDQPGGGIVHVVEKIHYGANGEREITVRVFGPFIVGNQFLVLGEGLOAEG  
 TuMKK3p GGVVNPTERLKQ IAEMLVVHYLLFNGSDGSWHHMETPYMEESSFRFSRNVYVGQSAIFDTLSTIRNFKGDQPSGGIFHVVEKIHCGADGEREITVRVSGSFIVGNQFLILGEGLOAEG  
 HvMKK3-3(5H) KSVHDPSEERLSQ IAHMLAVHYLLIFDGGDDQWCHMKSFYEQDSTFSFSEETHFGKSDIFDTLSRIREMLKDNSRCKKIGRVMKVKYCRAGHEEGMSVRVSGSFIMGNEFLVCADGFCAEG  
 TaMKK3-3(5AL) KSVHDPSEERLSQ IAHMLAVHYLLIF-----HMKSFYEQDSTFSFSGETHVGKSDIFDTLSRIREMLKGNRCEKIGRVMKVKYCRAGHEEGMSVRVSGSFIMGNEFLVCADGFCAEG  
 TuMKK3-3 KSVHDPSEERLSQ IAHMLAVHYLLIF-----HMKSFYEQDSTFSFSGETHVGKSDIFDTLSRIREMLKGNRCEKIGRVMKVKYCRAGHEEGMSVRVSGSFIMGNEFLVCADGFCAEG  
 TaMKK3-3(5BL) RSVHDPSEERLSQ IAHMLAVHYLLIFDGGDDQWHHMKSFYEQDSTFSFSGETHVGKSDIFDTLSRIREMLKGNRCEKIGRVMKVKY-RAHGEEGTSVRVSGSFIMGNEFLVCADGFCAEG  
 TsMKK3-3(U) RSVHDPSEERLSQ IAHMLAVHYLLIFDGGDDQWHHMKSFYEQDSTFSFSGETHVGKSDIFDTLSRIREMLKGNRCEKIGRVMKVKY-RAHGEEGMSVRVSGSFIMGNEFLVCADGFCAEG  
 ScMKK3-3 KSVHDPSEERLSQ IAHMLAVHYLLIFDGGDDQWRHMKSFYEQDSTFSFSGETHVGKSDIFDTLSRIREMLKGNRCEKIGRVMKVKYCRAGHEEGMSVRVSGSFIMGNEFLVCADGFCAEG  
 TaMKK3-3(5DL) KSVHDPSEERLSQ IAHMLAVHYLLIFDGGDDQWRHMKSFYEQDSTFSFSGETHVGKSDIFDTLSRIREMLKGNRCEKIGRVMKVKYCRAGHEEGMSVRVSGSFIMGNEFLVCADGFCAEG  
 TsMKK3-2(U2)p RDVVNPTERLKQ IAEMLAVHYLLFNGSEGPWNMKTFFYKEESSFSFSGNVYVGQSAIFDTLSNIRKCLKGDRPREKIVHVVEKLHCRAKWNRCYPCVWIIHHGQP-----  
 BAJ96085.1 RGVVNPTERLKQ IAEMLAVHYLLFNGSEGPWNHMKTFYREESSFRYLRCYIL\*-----  
 AKS50325.1 RGVVNPTERLKQ IAEMLAVHYLLFNGSEGPWNMKTFFYKEESSFSFSGNVYVGQSAIFDTLSNIRKCLKGDRPREKIVHVVEKLHCRRANGETEIAIRVSGSFITGNQFLIFGEGLOAEG  
 TuMKK3-2 RGVVNPTERLKQ IAEMLAVHYLLFNGSEGPWNMKTFFYKEESSFSFSGNVYVGQSAIFDTLSNIRKCLKGDRPREKIVHVVEKLHCRRANGETEIAIRVSGSFITGNQFLIFGEGLOAEG  
 ScMKK3-1 RGVVNPTERLKQ IAEMLAVHYLLFDGSEGPWNHMKTFYKEESSFSFSGNVYVGQSAIFDTLSNIRKCLKGDRPREKIVHVVEKLHCRRANGESEIAIRVSGSFITGNQFLIFGEGLOAEG  
 TsMKK3-2(U1) RGVVNPTERLKQ IAEMLAVHYLLFDGSEGPWNHMKTFYKEESSFSFSGNVYVGQSAIFDTLSNIRKCLKGDRPREKIVHVVEKLHCRRANGESEIAIRVSGSFITGNQFLIFGEGLOAEG  
 HvMKK3-2(5H) RGVVNPTERLKQ IAEMLAVHYLLFDGSEGPWNHMKTFYREESSFSFSGNVYVGQSAIFDTLSNIRKCLKGDRPREKIVHVVEKLHCRRANGETEIAIRVSGSFITGNQFLIFGEGLOAEG  
 BAU62004.1 RGVVNPTERLKQ IAEMLAVHYLLFNGSEGPWNHMKTFYREESSFSFSGNVYVGQSAIFDTLSNIRKCLKGDRPREKIVHVVEKLHCRRANGETEIAIRVSGSFITGNQFLIFGEGLOAEG  
 TaMKK3-2(5BL) RGVVNPTERLKQ IAEMLAVHYLLFNGSEGPWNHMKTFYREESSFSFSGNVYVGQSAIFDTLSNIRKCLKGDRPREKIVHVVEKLHCRRANGETEIAIRVSGSFITGNQFLIFGEGLOAEG  
 TsMKK3-2(B) RGVVNPTERLKQ IAEMLAVHYLLFNGSEGPWNHMKTFYREESSFSFSGNVYVGQSAIFDTLSNIRKCLKGDRPREKIVHVVEKLHCRRANGETEIAIRVSGSFITGNQFLIFGEGLOAEG  
 AetMKK3-2 RGVVNPTERLKQ IAEMLAVHYLLFNGSEGPWNHMKTFYREESSFSFSGNVYVGQSAIFDTLSNIRKCLKGDRPREKIVHVVEKLHCRRANGETEIAIRVSGSFITGNQFLIFGEGLOAEG  
 TaMKK3-2(5DL) RGVVNPTERLKQ IAEMLAVHYLLFNGSEGPWDHMKTFYREESSFSFSGNVYVGQSAIFDTLSNIRKCLKGDRPREKIVHVVEKLHCRRANGETEIAIRVSGSFITGNQFLISGEGLOAEG  
 \* :\*: \* .\*\*\*.\*\*\*.\*\*\*\*\*:\* :\*: \* :\*: \* : . .

**MKK3 continued**

TaMKK3 (3B)p MP SLDELTVDI PRIRVGQFREQFIMQPGISM ECYYSRQDLYI IQS\*  
 TuMKK3p MP GPDELAIDIPSNRAGQFREQFIMQPGISM ECYYP RQDLYI S\*--  
 HvMKK3-3 (5H) ML SIVEISPDILSKQACHFQEDFFMEPGTAMGCYVISRQELHI PVS\*  
 TaMKK3-3 (5AL) ML SMVELSPDILSKQAGHFQEDFFMEPGTAMGCYVISKQELHI GVS\*  
 TuMKK3-3 ML SMVELSPDILSKQAGHFQEDFFMEPGTAMGCYVISKQELHI GVS\*  
 TaMKK3-3 (5BL) ML SIVELSPDILSKQAGHFQEDFFMEPGTAMGCYVISRQELHI GVS\*  
 TsMKK3-3 (U) ML SM-ELSPDILSKQAGHFQEDFFMEPGTAMGCYVISRQELHI GVS\*  
 ScMKK3-3 ML SIVELSPDILSKQAGHFQEDFFMEPGTAMGCYVISRQELHI AVS\*  
 TaMKK3-3 (5DL) ML SIVELSPDILSKQAGHFQEDFFMEPGTAMGCYVISRQELHI GVS\*  
 TsMKK3-2 (U2)p I PDIW-----  
 BAJ96085.1 -----  
 AKS50325.1 MP SLEEIDIDIPSKRVGQFREQFTVHPGTSMGCYYIARQDLYI IQA\*  
 TuMKK3-2 MP SLEEIDIDIPSKRVGQFREQFTVHPGTSMGCYYIAKQDLYI IVQS\*  
 ScMKK3-1 MP SLDEIGVDIPSKRVGQFREQFTVLPGTSMGCYYIAKQDLYI IVQS\*  
 TsMKK3-2 (U1) MP SLDEIGVDIPSKRVGQFREQFTVLPGTSMGCYYIAKQDLYI IVQS\*  
 HvMKK3-2 (5H) MP SLDEIDIDIPSKRVGQFREQFTVHPGTSMGCYYIAKQDLYI IQS\*  
 BAU62004.1 MP SLDEIDIDIPSKRVGQFREQFTVHPGTSMGCYYIAKQDLYI IQS\*  
 TaMKK3-2 (5BL) MP SLDGIDIDIPSKRVGQFREQFTVHPGTSMGCYYIAKQDLYI IVQS\*  
 TsMKK3-2 (B) MP SLDGIDIDIPSKRVGQFREQFTVHPGTSMGCYYIAKQDLYI IVQS\*  
 AetMKK3-2 MP SLDEINIDIPSKRVGQFREQFTVLPGTSMGCYYIAKQDLYI IVQS\*  
 TaMKK3-2 (5DL) MP SLDEINIDIPSKRVGQFREQFTVLPGTSMGCYYIAKQDLYI IVQS\*



**MKK4 continued**

```
AK374401.1      RGIYE-----ER*
TsMKK4(U)       PQQQPQVLAAPPC*-----
HvMKK4(6H)     PQ-QQPQVLAAPPCQPPATINQVGMERX
TaMKK4(6AL)    PP-QQPQALAAPPC*-----
TaMKK4(6DL)    PQ-QQPQALAAPPC*-----
ScMKK4          PQ-QQPQVLAAPPC*-----
TaMKK4(6BL)    PQ-QQPQVLAAPPC*-----
TuMKK4         P-PQPQALAAPPC*-----
AetMKK4        PPPQPQALAAPPC*-----
                :
```



**MKK6**

TuMKK6 MRGKKPLKEL--SVPAQETPVDFKFLTASGTFKDGELRLNQRGLQLI SEENGDEHQSTKMKVEDVQLSMDDLEMIQV **GxGxxG** IGKGGGGVQVLRHKWVGTFFYALKGIQMNIQESVRKQIVQELKI  
AK333543.1 MRGKKPLKELTSLVPAQETPVDFKFLTASGTFKDGELRLNQRGLQLI SEENGDEHQSTKMKVEDVQLSMDDLEMIQV IGKGGGGVQVLRHKWVGTFFYALKGIQMNIQESVRKQIVQELKI  
TaMKK6 (4BL) MRGKKPLKELTSLVPAQETPVDFKFLTASGTFKDGELRLNQRGLQLI SEENGDEHQSTKMKVEDVQLSMDDLEMIQV IGKGGGGVQVLRHKWVGTFFYALKGIQMNIQESVRKQIVQELKI  
ScMKK6 MRGKKPLKELTSLVPAQETPVDFKFLTASGTFKDGELRLNQRGLQLI SEENGDEHQSTKMKVEDVQLSMDDLEMIQV IGKGGGGVQVLRHKWVGTFFYALKGIQMNIQESVRKQIVQELKI  
AK250233.1 MRGKKPLKELTSLVPAQETPVDFKFLTASGTFKDGELRLNQRGLQLI SEENGDEHQSTKMKVEDVQLSMDDLEMIQV IGKGGGGVQVLRHKWVGTFFYALKGIQMNIQESVRKQIVQELKI  
HvMKK6 (4H) MRGKKPLKELTSLVPAQETPVDFKFLTASGTFKDGELRLNQRGLQLI SEENGDEHQSTKMKVEDVQLSMDDLEMIQV IGKGGGGVQVLRHKWVGTFFYALKGIQMNIQESVRKQIVQELKI  
TsMKK6 (R) MRGKKPLKELTSLVPAQETPVDFKFLTASGTFKDGELRLNQRGLQLI SEENGDEHQSTKMKVEDVQLSMDDLEMIQV IGKGGGGVQVLRHKWVGTFFYALKGIQMNIQESVRKQIVQELKI  
TaMKK6 (4AL) MRGKKPLKELTSLVPAQETPVDFKFLTASGTFKDGELRLNQRGLQLI SEENGDEHQSTKMKVEDVQLSMDDLEMIQV IGKGGGGVQVLRHKWVGTFFYALKGIQMNIQESVRKQIVQELKI  
TaMKK6 (4DL) MRGKKPLKELTSLVPAQETPVDFKFLTASGTFKDGELRLNQRGLQLI SEENGDEHQSTKMKVEDVQLSMDDLEMIQV IGKGGGGVQVLRHKWVGTFFYALKGIQMNIQESVRKQIVQELKI  
AetMKK6 MRGKKPLKELTSLVPAQETPVDFKFLTASGTFKDGELRLNQRGLQLI SEENGDEHQSTKMKVEDVQLSMDDLEMIQV IGKGGGGVQVLRHKWVGTFFYALKGIQMNIQESVRKQIVQELKI  
\*\*\*\*\*

TuMKK6 NQATQSPHIVLCHQSFYHNGVIYLVLEYMDRGLADI IKQVKTILEPYLAVLCKQVLEGLLYLHHERH **DWK** VIHRDIKPSNLLVNHKGEVKITDFGVSAVLASSIGQRDTFVGTYNMAPERI  
AK333543.1 NQATQSPHIVLCHQSFYHNGVIYLVLEYMDRGLADI IKQVKTILEPYLAVLCKQVLEGLLYLHHERH VIHRDIKPSNLLVNHKGEVKITDFGVSAVLASSIGQRDTFVGTYNMAPERI  
TaMKK6 (4BL) NQATQSPHIVLCHQSFYHNGVIYLVLEYMDRGLADI IKQVKTILEPYLAVLCKQVLEGLLYLHHERH VIHRDIKPSNLLVNHKGEVKITDFGVSAVLASSIGQRDTFVGTYNMAPERI  
ScMKK6 NQATQSPHIVLCHQSFYHNGVIYLVLEYMDRGLADI IKQVKTILEPYLAVLCKQVLEGLLYLHHERH VIHRDIKPSNLLVNHKGEVKITDFGVSAVLASSIGQRDTFVGTYNMAPERI  
AK250233.1 NQATQSPHIVLCHQSFYHNGVIYLVLEYMDRGLADI IKQVKTILEPYLAVLCKQVLEGLLYLHHERH VIHRDIKPSNLLVNHKGEVKITDFGVSAVLASSIGQRDTFVGTYNMAPERI  
HvMKK6 (4H) NQATQSPHIVLCHQSFYHNGVIYLVLEYMDRGLADI IKQVKTILEPYLAVLCKQVLEGLLYLHHERH VIHRDIKPSNLLVNHKGEVKITDFGVSAVLASSIGQRDTFVGTYNMAPERI  
TsMKK6 (R) NQATQSPHIVLCHQSFYHNGVIYLVLEYMDRGLADI IKQVKTILEPYLAVLCKQVLEGLLYLHHERH VIHRDIKPSNLLVNHKGEVKITDFGVSAVLASSIGQRDTFVGTYNMAPERI  
TaMKK6 (4AL) NQATQSPHIVLCHQSFYHNGVIYLVLEYMDRGLADI IKQVKTILEPYLAVLCKQVLEGLLYLHHERH VIHRDIKPSNLLVNHKGEVKITDFGVSAVLASSIGQRDTFVGTYNMAPERI  
TaMKK6 (4DL) NQATQSPHIVLCHQSFYHNGVIYLVLEYMDRGLADI IKQVKTILEPYLAVLCKQVLEGLLYLHHERH VIHRDIKPSNLLVNHKGEVKITDFGVSAVLASSIGQRDTFVGTYNMAPERI  
AetMKK6 NQATQSPHIVLCHQSFYHNGVIYLVLEYMDRGLADI IKQVKTILEPYLAVLCKQVLEGLLYLHHERH VIHRDIKPSNLLVNHKGEVKITDFGVSAVLASSIGQRDTFVGTYNMAPERI  
\*\*\*\*\*

TuMKK6 SGSSYDYKSDVWSLGLVILECAIGRFPTYTPPEGEGWLSFYELLEAIVDQPPPSAPADQFSPEFCSFISSCIQKDAERMSASELLNHAFIKKFEDKDLDRILVESLEQPMNVPE\*  
AK333543.1 SGSSYDYKSDIWSLGLVILECAIGRFPTYTPPEGEGWLSFYELLEAIVDQPPPSAPADQFSPEFCSFISSCIQKDAERMSASELLNHAFIKKFEDKDLDRILVESLEQPMNVPE\*  
TaMKK6 (4BL) SGSSYDYKSDIWSLGLVILECAIGRFPTYTPPEGEGWLSFYELLEAIVDQPPPSAPADQFSPEFCSFISSCIQKDAERMSASELLNHAFIKKFEDKDLDRILVESLEQPMNVPE\*  
ScMKK6 SGSSYDYKSDVWSLGLVILECAIGRFPTYTPPEGEGWLSFYELLEAIVDQPPPSAPADQFSPEFCSFISSCIQKDAERMSASELLNHAFIKKFEDKDLDRILVESLEQPMNVPE\*  
AK250233.1 SGSSYDYKSDVWSLGLVILECAIGRFPTYTPPEGEGWLSFYELLEAIVDQPPPSAPADQFSPEFCSFISSCIQKDAERMSASELLNHAFIKKFEDKDLDRILVESLEQPMNVPE\*  
HvMKK6 (4H) SGSSYDYKSDVWSLGLVILECAIGRFPTYTPPEGEGWLSFYELLEAIVDQPPPSAPADQFSPEFCSFISSCIQKDAERMSASELLNHAFIKKFEDKDLDRILVESLEQPMNVPE\*  
TsMKK6 (R) SGSSYDYKSDVWSLGLVILECAIGRFPTYTPPEGEGWLSFYELLEAIVDQPPPSAPADQFSPEFCSFISSCIQKDAERMSASELLNHAFIKKFEDKDLDRILVESLEQPMNVPE\*  
TaMKK6 (4AL) SGSSYDYKSDVWSLGLVILECAIGRFPTYTPPEGEGWLSFYELLEAIVDQPPPSAPADQFSPEFCSFISSCIQKDAERMSASELLNHAFIKKFEDKDLDRILVESLEQPMNVPE\*  
TaMKK6 (4DL) SGSSYDYKSDVWSLGLVILECAIGRFPTYTPPEGEGWLSFYELLEAIVDQPPPSAPADQFSPEFCSFISSCIQKDAERMSASELLNHAFIKKFEDKDLDRILVESLEQPMNVPE\*  
AetMKK6 SGSSYDYKSDVWSLGLVILECAIGRFPTYTPPEGEGWLSFYELLEAIVDQPPPSAPADQFSPEFCSFISSCIQKDAERMSASELLNHAFIKKFEDKDLDRILVESLEQPMNVPE\*  
\*\*\*\*\*:\*\*\*\*\*







**MKK10 continued**

|                    |                     |
|--------------------|---------------------|
| TuMKK10p           | REVIAQRV*-----      |
| AetMKK10p          | -----               |
| HvMKK10(1H)p       | RHVIVETM*-----      |
| ScMKK10p           | REIIVETM*-----      |
| BAJ94499.1         | AALVAEAAELGDQ*----- |
| HvMKK10-2(4H)      | AALVAEAAELGDQ*----- |
| TaMKK10-2(4AS)     | AALVAEAAELGDQ*----- |
| TsMKK10p           | -----               |
| TaMKK10-2(4BL)     | AALVAEAAELGDQ*----- |
| TaMKK10-2(4DL)     | AALVAEAAELGDQ*----- |
| TuMKK10-1/3        | RKLIEQRC*-----      |
| TaMKK10-1/3(4BSc1) | -----               |
| TaMKK10-1/3(4BSc4) | RKLVADASSSL*-----   |
| TaMKK10-1/3(4BSc5) | -----               |
| TaMKK10-1/3(4DSc2) | RKLVADASSPSSDCRHT*  |
| TaMKK10-1/3(4BSc3) | RKLVADASSSL*-----   |
| HvMKK10-1/3(U)     | RKLVADASSSL*-----   |
| TaMKK10-1/3(4AL)   | RKLVADASSSL*-----   |
| TaMKK10-1/3(4BSc2) | RKLVADASSSL*-----   |
| TaMKK10-1/3(4DSc1) | RKLVADASSPSSLECRHT* |
| AetMKK10-5p        | REVIAQR-----        |
| HvMKK10-5(4H)      | REVIEQRQ*-----      |
| TaMKK10-5(4DS)     | REVIAQRV*-----      |
| TaMKK10-5(4AL)     | REVIAQRV*-----      |
| TaMKK10-5(4BS)     | REVIEQRV*-----      |
| HvMKK10-4(4H)      | CQVIEQRSMPISTRV*--- |
| TaMKK10-4(3B)      | REVIDQRRCR*-----    |
| TaMKK10-4(4BS)     | REAIEQRRCR*-----    |
| TaMKK10-4(4DS)     | REVIEQRRCG*-----    |
| TaMKK10-4(4ALc2)   | RKLIEQRC*-----      |
| TaMKK10-4(4ALc1)   | GEVIKQRC*-----      |
| TuMKK10-4          | GEVIKQRC*-----      |
