# Supplementary material for: Analysis of MAPK and MAPKK gene families in wheat and related Triticeae species
Source: PubMed Central journal article supplement (PMC5838963; doi:10.1186/s12864-018-4545-9), 2018-03-05
Supplement: 12864_2018_4545_MOESM9_ESM.pdf [file 12864_2018_4545_MOESM9_ESM.pdf]

**Additional File 9. Yeast-two-hybrid table and MAPK sequences.** Weak (+) and strong (+++) positive or negative (-) MPK-MKK and MKK-MKKK interactions are presented in the table (p. 2). Positive Y2H interactions for orthologous genes observed in Arabidopsis [1], rice [2, 3], brachypodium [4], maize [5] are also shown. MPK and MKK sequences used that do not match a nucleotide identifier from Additional File 3 are marked as clones or synthetic (syn), and the alignment for these sequences are provided at the end of this file (p. 6-18). TaMKKK sequences are provided (p. 4-5) along with phylogenetic analysis (p. 3) of MKKK sequences used here together with MKKK sequences identified in Wang et al. [6].

### Reference:

1. Lee JS, Huh KW, Bhargava A, Ellis BE. Comprehensive analysis of protein-protein interactions between Arabidopsis MAPKs and MAPK kinases helps define potential MAPK signalling modules. *Plant Signal. Behav.* 2008;3:1037-41.
2. Singh R, Lee M-O, Lee J-E, Choi J, Park JH, Kim EH, et al. Rice mitogen-activated protein kinase interactome analysis using the yeast two-hybrid system. *Plant Physiol.* 2012;160:477-87.
3. Wankhede DP, Misra M, Singh P, Sinha AK. Rice mitogen activated protein kinase kinase and mitogen activated protein kinase interaction network revealed by *in-silico* docking and yeast two-hybrid approaches. *PLoS ONE.* 2013;8:e65011.
4. Chen L, Hu W, Tan S, Wang M, Ma Z, Zhou S, et al. Genome-wide identification and analysis of MAPK and MAPKK gene families in *Brachypodium distachyon*. *PLoS ONE.* 2012;7:e46744.
5. Kong X, Pan J, Zhang D, Jiang S, Cai G, Wang L, et al. Identification of mitogen-activated protein kinase kinase gene family and MKK-MAPK interaction network in maize. *Biochem. Biophys. Res. Commun.* 2013;441:964-9.
6. Wang M, Yue H, Feng K, Deng P, Song W, Nie X. Genome-wide identification, phylogeny and expressional profiles of mitogen activated protein kinase kinase kinase (MAPKKK) gene family in bread wheat (*Triticum aestivum* L.). *BMC Genomics.* 2016;17:668.

**Table.** Weak (+) and strong (+++) positive or negative (-) MPK-MKK and MKK-MKKK Y2H interactions. n.d. = no data. Positive interactions for orthologous genes were observed in <sup>a</sup>Arabidopsis [1], <sup>b</sup>rice [2, 3], <sup>c</sup>brachypodium [4], <sup>d</sup>maize [5]. It should be noted that Arabidopsis and rice have only one paralogue of MKK3, and Arabidopsis has only one MKK10. The reported MKK6-MPK16 in rice was observed for OsMPK16-1, whereas the OsMKK6-OsMPK16-2 was negative. Other notable interactions from previous reports include: OsMKK10-2 with OsMPK7 [3]; BdMKK3-1, but not BdMKK3-2, with BdMPK7-1/11 [4], and ZmMKK3-1 with ZmMPK6-2/7 [5].

|                              |                      |                         |                      |                   |                  |                  |                    |                      |                    |                      |                    |
|------------------------------|----------------------|-------------------------|----------------------|-------------------|------------------|------------------|--------------------|----------------------|--------------------|----------------------|--------------------|
| TaNPK-1 (syn)                | -                    | +                       | +                    | -                 | +                | -                | -                  | -                    | -                  | -                    | -                  |
| TaZIK7 (Traes_2BS_18264AA5C) | -                    | +++                     | -                    | -                 | -                | -                | -                  | -                    | -                  | -                    | -                  |
| TaMKKKA2 (syn)               | -                    | -                       | -                    | -                 | -                | n.d.             | -                  | +                    | -                  | -                    | -                  |
| TaMKKK2b (syn)               | -                    | -                       | -                    | -                 | -                | -                | -                  | -                    | -                  | -                    | -                  |
| TaMKKK2a (syn)               | -                    | -                       | -                    | -                 | -                | n.d.             | -                  | +                    | -                  | -                    | -                  |
| TaFLR (AY173961)             | -                    | -                       | -                    | -                 | -                | -                | -                  | -                    | -                  | -                    | -                  |
| EDR-1 (AY743662)             | -                    | -                       | -                    | -                 | -                | -                | -                  | -                    | -                  | -                    | -                  |
| TaCTR1 (DQ211934)            | -                    | -                       | -                    | -                 | -                | -                | -                  | -                    | -                  | -                    | -                  |
| AK336073                     | -                    | -                       | -                    | -                 | -                | -                | -                  | -                    | -                  | -                    | -                  |
| AK335039                     | -                    | -                       | -                    | -                 | -                | -                | -                  | +                    | -                  | -                    | -                  |
| TaMEKK1 (AK334817)           | -                    | -                       | -                    | -                 | -                | -                | -                  | -                    | -                  | -                    | -                  |
| TaMEKK22 (AK333042)          | -                    | -                       | -                    | -                 | -                | -                | -                  | -                    | -                  | -                    | -                  |
| AK330734                     | -                    | -                       | -                    | -                 | -                | -                | -                  | -                    | -                  | -                    | -                  |
|                              | TaMKK1-1<br>(syn)    | TaMKK3-2a<br>(KT187393) | TaMKK3-2b<br>(clone) | TaMKK3-3<br>(syn) | TaMKK4<br>(syn)  | TaMKK5a<br>(syn) | TaMKK5-2b<br>(syn) | TaMKK6<br>(RFL_4066) | TaMKK10-2<br>(syn) | TaMKK10-1/3<br>(4AL) | TaMKK10-4<br>(4DS) |
| TaMPK3 (4DL)                 | -                    | -                       | -                    | -                 | - <sub>a,b</sub> | -                | -                  | -                    | -                  | -                    | -                  |
| TaMPK4 (clone)               | +++ <sub>a,b,d</sub> | -                       | -                    | -                 | -                | -                | -                  | +++ <sub>a,b</sub>   | -                  | +                    | -                  |
| TaMPK6 (7DS)                 | - <sub>b</sub>       | - <sub>b</sub>          | - <sub>b</sub>       | - <sub>b</sub>    | - <sub>a,b</sub> | + <sub>a,b</sub> | - <sub>a,b</sub>   | + <sub>a,b,c</sub>   | - <sub>b,d</sub>   | +                    | -                  |
| TaMPK7 (7BL)                 | -                    | - <sub>a,b</sub>        | - <sub>a,b</sub>     | - <sub>a,b</sub>  | -                | n.d.             | -                  | -                    | - <sub>b</sub>     | -                    | -                  |
| TaMPK11 (7BL)                | - <sub>a</sub>       | -                       | -                    | -                 | -                | n.d.             | -                  | - <sub>a</sub>       | -                  | -                    | -                  |
| TaMPK14 (6DS)                | -                    | - <sub>a,b</sub>        | - <sub>a,b</sub>     | - <sub>a,b</sub>  | -                | -                | -                  | +++                  | -                  | -                    | -                  |
| TaMPK16 (1BS)                | n.d.                 | n.d.                    | n.d.                 | n.d.              | n.d.             | -                | n.d.               | - <sub>b</sub>       | -                  | -                    | -                  |
| TaMPK17 (clone)              | -                    | -                       | -                    | -                 | -                | -                | -                  | -                    | - <sub>a</sub>     | - <sub>a</sub>       | - <sub>a</sub>     |
| TaMPK20-1 (3AL)              | -                    | -                       | -                    | -                 | -                | -                | -                  | - <sub>b</sub>       | -                  | -                    | -                  |
| TaMPK20-2 (clone)            | -                    | -                       | -                    | -                 | -                | -                | -                  | -                    | -                  | -                    | -                  |
| TaMPK20-3 (KR422425)         | -                    | -                       | -                    | -                 | -                | -                | -                  | - <sub>b</sub>       | -                  | -                    | -                  |
| TaMPK20-4 (clone)            | -                    | -                       | -                    | -                 | -                | -                | -                  | - <sub>b</sub>       | -                  | -                    | -                  |
| TaMPK20-5 (KR422426)         | -                    | -                       | -                    | -                 | -                | -                | -                  | -                    | -                  | -                    | -                  |
| TaMPK21-1 (KR422427)         | -                    | -                       | -                    | -                 | -                | -                | -                  | -                    | -                  | -                    | -                  |
| TaMPK21-2 (clone)            | -                    | -                       | -                    | -                 | -                | -                | -                  | -                    | -                  | -                    | -                  |
| TaMPK24 (clone)              | -                    | -                       | -                    | -                 | -                | -                | -                  | -                    | -                  | -                    | -                  |

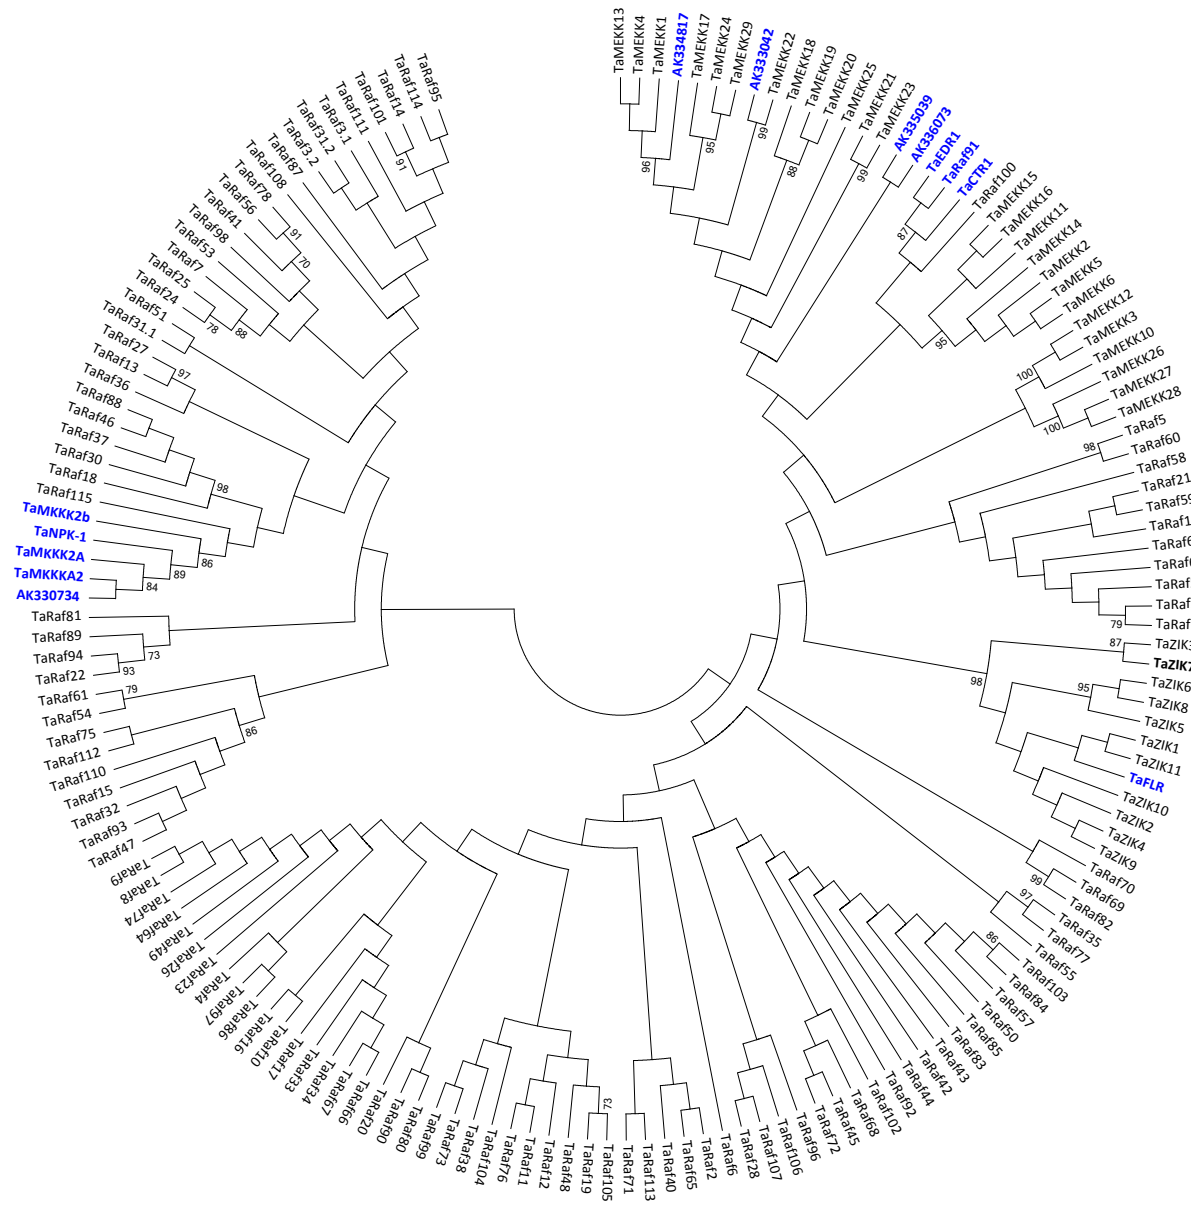

**Phylogenetic Tree.** Previously reported TaMAPKKK protein sequences [6] were aligned with TaMAPKKK (blue font) sequences used for Y2H experiment presented in the Table above. TaMAPKKK sequences used for Y2H are presented below.

**>TaFLR (AY173961)**

MSSPRRPEMSPAARNNDNGYVETDPTGRYGRFDELLGKGAMKSVYRGFDEVRGVEVAWNQANLADVLRTPDALQRMYSVHLLSTLRHDAI IAFHASWVSVSSPSPRGGCTGGTPRRTFNFI TELFSSGTLRAYRLRYPRVSLRAVRGWARQILRGLAY  
LHAHDPPIVHRDLKCDNVFVNGHQGTVKIGDLGLAAVLRGAQAHSVIGTPEFMAPEMYDEDEDYDELVDVYSFGMCMLEMLTVEYPPYAECNSPAQIYKVKVTSGLKLPDAFYRVDDADARRFIGRCLVPASHRPSAQE LLLDRFLSTQD TMTLSPPPLLP  
LPTSGDRKDNPEEAEPVAARTDMITGKLN TDDDTIFLKVQIVDEAGHSRNIYFPFDIAGDTATEVAREMVKELDI TDRDPSEIAAMIEQEITRLVPDWVGGGCDQOEYTYADNDNNEEQPPFYLLSSSPTSNGSHCGTGPTTSGGGYAGWFQDYA  
VSSDDDETSSSTRSALHYSSEEAQPEEKPGVSKTGQVKATRFGPGDSTAGHDVSSSRAGRPRHHRGSPDAGGDEGRPRRQQRMTNRNSMVDVRSQ L LHRTLVEELNKRMFNTVGA VENIGFRRI PGYGGGPPSSSATVTSSRGGDQRGRSSGKDKHQ  
FFMF

**>TaNPk-1**

MAIAVSGQWTRLRRTLGC GASGAVVTLAADAASGELFAVKSVRAVDAAQLSREQGILSGLSSPHVVCIGGGGDRDGSYHLFLEFAPGGSLADEAARNNGRLEERAIRAYAADVLRGLAYIHGKSLVHGDVKSRNVVIGADGRAMIADFGCARALGSAGP  
IGGTPAFMAPEVARGEEQGPADVWALGCTVVEMATGRAPWGEMDNVLA AVHRIGYTD AVSEVPTWLSAEAKSFLAMCFARNARDRCTAAQLLEHPFVALQAGEAKARWVSPKSTLDAAFWESETDEEEVESESP CERIKSLSCSVLPDWDSDEGWID  
VLGEQCEEACDSPAATKGPADVSSRAPSKVLGSPAAPAEDA AVVGTLSSEDELDAEDEPF GDDIILAADPLVDRQIQVCWSSR

**>TaMKKKA2**

MDVAVAKQLRRIRTLGRGASGAVVWLASDEASGELLAVKSAGAGGAAQLEREGSVLTGLCSPHIIPCLGSRAAECGEYQLFLEFAPGGSLADEAARS GGCLPEPAIRAYAGDVARGLEYLHARSLVHGDVKARNV VIGGDGRARLTDFGCARAVDSL LP  
MGGTPAFMAPEVARVEEQGPASDVWALGCTVVEMATGRAPWSDMNDLLAAVHRIGYTA AVPEVPGLWLSAEAKDFLDGCFRRQPSDRSTAAQLLDHPFVASAAAAGDYKAAPAKQQYTS PKSTLQDALWSDTDDDEADEMSATPAERIGALACGNSALPD  
WSDDDGWIDVCDEVHRVPD SPADAGYDLVWPEESDAEREPFAVAADDSNDIPRNAVVT DSSIWQDSYVRPVHLGSCRNQFHPFQSDG DENLRFDRRCNKDRVTGDDPVAAA EVVPAPAKHHVPLEVLDLHPEHAPLVHRQP NHAREPLDDQP GVHLLH  
ELARDEHGEVLVLDLLVEAQRLPGPLLVALPRRSSP

**>TaMKKK2A**

MSVSKQWTRVRTLGRGASGA EVFLAADDASGELFAVKASASAACAALRREQRVMAGLSSPRVVCIGGRGAPDGSYQLFLEFAPGGSLADQMATGLDELAVRGYAADVAAGLAYLHSAGMVHGDVKARNV VIGADGRAKLADFGCSRKAGADVP IIGGT  
PAFMAPEVARGE EQSPAADVWALGCMVEMATGRTPWSGMDG DALAALHRIGYTEAMPEVPEWLSADAKDFLARCLVRQASDRCTAAQLLEHPFLASAVVEAKAQAVESK WVSPKSTLDAAFWESDSDTEEAHDSAE TRIRALACPASELPDWSDSE  
GWIDVLS SPTGATGAVPVVVEEMTDLDEDAT TDEE PPGAESRVLAITLDVEYNSVLNAVEACD DSFRRHQSLECLASHELSCTELL LCNKRTNAIDL VVAQALCFRTAALCFTAPHCDTFE

**>TaMKKK2b**

MGVGEWTRGPAIGRGSSATVSI AVDRRTGGVIAVK SVGADRAAELRREQGILRGLTSPYVVRCLAEVVSASVDGGLDMLMEYAPSGSLADEIRR CGGRCAEALVRSRARDILLGLAHVHAAGVAHCDVKGRNVLI ASDGRAL IADFGCARRTG GGIAGE  
ERQRP TGGTPMFMAPA EAARGE EQGPAADIWAVGCTV IEMATGAAPWQR FASPVATLHHVAFSGEAP EFPACLSDQKDFLARCLRQDPRERWTAEQ LLEHEFVAAGTASSNSAPGITEKATFVSPKSVLDQALWEDDDDDTAADTADPTDRVRLAA  
GAPAVPDWTDASWITVHAGPSGXADEEPAMPSEPEASTD TDSDDSPVGDGGSAGRAAAA EVGASSSHQASHANS DRYDGTGSCNVERSDDGNHVVSDDCSTVPITSN GFFSDTTS CFACPSRSQAGRTGPFVTVLLYHISSPRCCSSCHLFLASPLLAG  
VSGTRSPT

**>TaEDR1 (AY743662)**

MKIPFVTKWSHRSSE PAPSNSAAAQQQQQAPSSP SAPSPPPPVASTEAVGDEFILQE EYQMLALALSASASGAEEAGDPDGEQIRKAKLMSLKGKDPVTNTDRGGGDTPELSRRYRDY NFDYNEKVIDGFYDIFGLSAESSGQ GKIPSLAELQM  
SIGDLGYEVI VVDYKFDNALQEMKEVAECCLLGC PDITVLVRRIAEVVADHMGGPVIDANEMITRWLSKSIEQRTSHQTSLLHIGSIEI GLSRHRALLFKILADIVGIPCKLVKGSHTYGVEDDAINI IKMDDKREFLVDVMAAPGTLIPADVFN SKGT  
PFKFSQTLGQNQVVE SASNI EDDPVALQSEHKRNQGHMFANNRISDNLS SYENTV TAGSSASEPGTLDPRMQLGKTSTLASAPSKQKKNLQLIPDSHETEESRKLFAEFDPFNATKSGKSSLVFKGLNNRNNEFQRRRENVVPPSVRSQQPLVMKNWS  
ACNDISNNKQYNVADG SVPRRNATDNASSQLALSTAKHYNSNVRELNDRVYAAPARNYDNKIVGT SAMAKALTGECPDRSQVPPGLYYDKMLGTSSMNAASTSGIGKVAEKDPHNDPGKGP IYSRFDGELS KNAQGFTPERDEHKENC GSHDHKMLYP  
DPRKSP LDRFMDRPRQSI ECVFPSQVGSNKADMVLEDEVSECEILWEDLVIDERIGIGSYGEVYHADWNGTEVAVKFLDQEFYGDAL EEFRCV ERMRRLRHPNIVLFMGAVTRP PHL SIVSEYLP RGSLYKI IHRPNCQIDEKRRIKMALDVARGMNC  
LHTSVPTIVHRDLKSPNLLVDDNWTVKV CDFGLSR LKHSTFLSSKSTAGTPEWMAPEVLRNEQSN EKCDIYSFGVILWELATLRKPWHGMNQMVVAVGQDRRLDIPKEVDP IVASII RDCWQKDPNLRPSFIQLTSYLKTLQRLVIPSHQETASNH  
VPYEISLYR

**>TaCTR1 (DQ211934)**

MPHRRRLHNLVPPLP PPPAAPHPAFDLSVAESRLPLLADYGR LKPVDDL PAPAAPP SAHWSAGSAFTGTEPATASTSTAATGSSLXPASSVARDDTWVRSRESYYLQLSLAIRITSEAF LAGVPPPELLVRR LGPGDAAA EQHADVPADAAVSYRLWV  
NGCLSWGDKIAHG FYNXMGIDPHXWAMCNADEGEGRRLPTLAALREVDASDQSSLEVVLDKCGDSVLVDLERRALDLYRALGATLDLVRRLALLVSDHMGGALRSEDGDLYMRWKAGSKRLRKQQKSVVVP IGRLSIGFCRHRAILFKALADFI GLPC  
RIAQGC KYCSAPHRSSCLVKI ENDRYSREYVVDLVVAPGSICSPDSSINGQLLXSVSSPFKTSCTASLENYAAPVAAWNRAIADDR CNVSFSDS QXSVAGDKNPVQADTKCGQVMQNDNCNNMSV FQVXRQFKAMEVGT EGVNKENI PGLTLPKHLA  
ESSFAMDWLEISWDELELKERIGAGSFGTVYRADWHGSDVAVKVLTDQGDGEAQLKEFLREISIMKRVRHPNVVLFMGAVTKCPHLSIVTEYLP RGSFLRLISXASSGEILD LRRRLRMALDVAKGINYLHCLNPPIVHWDLKT PNMVLDKNWSVKVGD  
FGLSRFXATTFISSKSVAGTPEWMAPEFLRGEPSNEKCDVYSFGVILWELLTMQQPWGGLGPAQVVGAVAFQNRRLPIPKD TIPELAALVESCSWDDPRQRPSFS SIVDTLKKLLKSMQSGSGS

**>AK336073**

MGTPQRPRQLARTNAMRNSSYSADAGAAGDDDLAAYGRIQLSVDRAARASPGARAGYASQTSFRIHGGRGGGEEVAELFRQLGLSGPEDFAIPPAVYAAANAARRAASLEEPSAALPSGVPEISGRDVVVASRLQPAGDGEEAGLATELVQSETIQ  
VSAKSYQRPWAESKAILVESERVETSTREVTAVSEPENAGEGKGNLAKVEISREERTREVVEATREKATGALALVVAESNSCDIEHLVSPSPNRRFRRTITTSWIKGGHIGSGSFGSVYEASDDGFFFVAVKEVSLIDQGINKQRIVQLEHEVSL  
SRLEHDNIVQYYGTDKEDGKLYIFLELVTQGSAAALYQKYCLQDSQVSAYTRQILNGLNYLHQRNVLHRDIKCANILVDANGLVKLADFLAKEMSIQSARSSKGTVFWMAPEVAKAKPHGPPADIWSLGC TVLEMLTGKVPYPDMEWTHALLKIGRG  
IPPKIPNTLSEADRFIAKCVQANQKDRPSAAQLLEHFPVKKRPLQH

**>AK335039**

MGRPSQDTATSTSPSGSCRSSKRGPRLLDRRNASKNIGYEYDPAKLFCSYPPSPSRASSASASAAPSVASSVDLSSFRIGGSGDGGGDVQLLCRNLGLSGPEDFAISLTDWEAHKAFRSSAFSSASSSPSARSQPDRPVRESPLRHEAVEEPTLPADADF  
ELPAKETARDPPVEAPVRPAWLDPPPARPDVKKPGCEGGIKGVRPPVMLKPPPSMALPPASQAGSTWDILLSFAPEEQGGQPAIRSVPDFGDPDAEDEDAAEVLTLLEDLRLGESSEEFVTGTSSISTTNDDETTESMFYISPNGRFKRKIRSWSRGVL  
LGSFSFGTVYEGISDEGVFFAVKEVSLHDQGSNAQQCIFQLEQEIALLSQFEHENIVHYFGTDKEDSKLYIFLELVTQGSLSVSLYQKYRLRDTHTVSAYTRQILNGLNYLHERNIVHRDIKCANILVHANGSVKLVADFLAKQTSKLNVLKCKGTVYWM  
APEVVNPKKTYGPAADIWSLGC TVLEMLTRQLPYPDLEWTQALYRIGKGEPPAIPSGLSKEARDFISQCVPKNPEDRPSASKLLDHPFVNRSMRSIRSMRTYTRPNSSTRGTSG

**>AK334817**

MPAWWKGKGRSKSKAAAPAGDAGTIPAGRIDGEKDRKKNKASSFDEALIGREGRGKQLQQPAPAVGHPLPRPASMPASAPASASASASSGGSSSLGSSAASDEPLDLGIYRISDANRTPAIDSRKQSLVLEEGRFVNNLASENNRSCEPSVSPRKEFQ  
PNILDLPDRTTYCHGRKSTEIVFATRMPNSPPSSRGKHCPTSPVHSRAFGQCPGSPATAWQDDARNSSSPHPLPLPPGSPCTSSRSLHSQWKKGKLLGSGTFGQVYLGFNSEGGQCAIKEVKVIADDSNSKECLRQLNQEMLLLNQLSHPNIVQYYGS  
ELSSSETLSVYLEFVSGGSIHKLLQEYGFGETILRNYTAQILSGLAYLHGRNTVHRDIKCANILVDPNGDIKLADFGMAKHISAYTSIKSFKGSPYMAPEVIMNTNGYSLSDIWSLGC TIELEMATARPPWSQYEGVAAIFKIGNSKDIPDIPDHLSS  
EAKSFLKLCQRDPAARPTAAQLIEHPWVKDQASVRSRSGSGITRDMFSTSTDGSKATVKTSEIELSSYRSLPLRDTNLRMRNLVVPASSIPSISTRASAIASNVNMMNSLPVSPCTSPLRQYRQSNRCLPSPHPAYSAGAANYSPINNVLPT  
RPSNYLTDPWLETPRQKTQTFDSPRRL

**>AK333042**

MAFSRSPWSRSKPDISTVVVHDEDDARGGGAARAEDDDDDPSALPPLLQRLPKDFGGASFDDDDPYSSDLDDASLSATVVIKRGAPASTSSSSRSPFLDLRRSSPRAAEADPFSTFVHGTARSGGASSPRESVSGTFIRHSGGPPSPRESVS  
GTFIRHTRGSSSPHESFSGTFIHHTSSASSPRDSASGAGAGFGSSFITPSSGQAEEDRQPSLLMQQQSRRKASMSLPSVTRDPSTKYELLHELKGSYGAVYKARDLRTQELVAVKIIISLTEGEEGYEDIRGEIEMLQQCSHPNVVRYFGSYQGE  
EYLWIVMEYCGGGSVADLIGITEEPLDEPQIAYICRETLKGLAYLHTIFKVHRDIKGNILLTEQGEVKLGDFGVAALTRTMSKRNTF IGTPHWMapevIQESRYDGKVDVWALGVSAIEMAEGMPPRSTVHPMRVI FMISSPAPMLEDKKWSLLF  
HDFIAKCLTKDARLRPPAIEMLKHKFIEKCN TGASKMLAKIKEAKI IRETAVQNQLPDSDDAMDATVRINEDYGETVPTNSQSTHETKNDGSGGDFGTMIVHPEDGDEAAESSIFPRAEFIPGLGINSFTHDPKRAELISKFWAESTAESDASKERDL  
YGLPDIQEPKTMPRSTGTVKHHKGVGTVLRHDITASPGVASTMNLSSSPSRKAFSVQDKLWSIYAAGNTVPIPFKAIIDISPLALVSDSVAGNGPAGSSTTDALEAVRELFSGDGQAKKGRKGQNEAPLPPGVHDRLTTSPTLMNLAQALAYHKTCY  
EDMPLQDSQATEEQQTIQNLCDTLRLTILRL

**>AK330734**

MDATTAKQLRRLRTLGRGASGAVVWLASDDASDQLLAVKSAGAGAADTLRREGSVMAGLCSPIHVPCLGSRAAPGGEYQLFLEFAPRGLADEAARSGGSLAERIAIQGYAADVARGLAYLHGNSLVHGDVKARNVMVGADGRAKLADFGCARAADSRT  
IGGTPAFMAPEVARGEEQGLAADVWALGCTVIEMATGRAPWGDMDVFAAVHRIGYTDVPELPASLSPQAKDFLCKCLARNPRHRSTAAQLLEHFPFLASAFRDVAEPAKQDWMSPKSTLNAEFWESDEESETEDMLTSAERIASLASPCSALPDWE  
SDDGWIDVHGERPEASETTSATAIAGTDFGPWSREEGLEAELGVRFADADAGRWDLVNRNVDGAHYFGWYERDFSVSVATDRPLCLIVSHGRKIVKFGCHCDRERTMHFDFAQIFRSLELPSHAVCILSSTEWGYCRFLAFSFIN

```

TaMKK1-1 (7AS) MKKPGKLALPSQDSTIGKFLTQSGTFKDGDLVVKDGLRIVPQSEEGEAPPIKPLDNNHQ LSIDDLDSIKVIGKGNSTVQLVRHKWTGQFFALKVIQLNIQESIRKQMAQELKISLFTQ
TaMKK1-1 (4AL) MKKPGKLALPSQDSTIGKFLTQSGTFKDGDLVVKDGLRIVPQSEEGEAPRIKPLDNNHQ LSIDDLDSIKVIGKGNSTVQLVRHKWTGQFFALKVIQLNIQESIRKQMAQELKISLFTQ
TaMKK1-1 (7DS) MKKPGKLALPSQDSTIGKFLTQSGTFKDGDLVVKDGLRIVPQSEEGEAPPIKPLDNNHQ LSIDDLDSIKVIGKGNSTVQLVRHKWTGQFFALKVIQLNIQESIRKQMAQELKISLFTQ
TaMKK1-1 (syn) MKKPGKLALPSQDSTIGKFLTQSGTFKDGDLVVKDGLRIVPQSEEGEAPPIKPLDNNHQ LSIDDLDSIKVIGKGNSTVQLVRHKWTGQFFALKVIQLNIQESIRKQMAQELKISLFTQ
*****

TaMKK1-1 (7AS) CQYVVTTCYQCFYVNGVISIALEYMDGGSADFLKAVRTVPEAYLAAICKQVLKGLMYLHH EKRVIHRLDKPSNILNHRGEVKISDFGVSAIISSSAQRDFTTGTFFNYMAPERISGQKH
TaMKK1-1 (4AL) CQYVVTTCYQCFYVNGVISIALEYMDGGSADFLKAVRTVPEAYLAAICKQVLKGLMYLHH EKRVIHRLDKPSNILNHRGEVKISDFGVSAIISSSAQRDFTTGTFFNYMAPERISGQKH
TaMKK1-1 (7DS) CQYVVTTCYQCFYVNGVISIALEYMDGGSADFLKAVRTVPEAYLAAICKQVLKGLMYLHH EKRVIHRLDKPSNILNHRGEVKISDFGVSAIISSSAQRDFTTGTFFNYMAPERISGQKH
TaMKK1-1 (syn) CQYVVTTCYQCFYVNGVISIALEYMDGGSADFLKAVRTVPEAYLAAICKQVLKGLMYLHH EKRVIHRLDKPSNILNHRGEVKISDFGVSAIISSSAQRDFTTGTFFNYMAPERISGQKH
*****

TaMKK1-1 (7AS) GYMSDIWSLGLVMLECATGNFPYPPRESFYELLEAVVDQSPSPAPSDQFSPEFCSFISAC IQKNAADRSSAQTLVAHPFLSMYDDLNIDLSDYFTTAGSPLATFKQIAL
TaMKK1-1 (4AL) GHLSDIWSLGLVMLECATGNFPYPPRESFYELLEAVVDQSPSPAPSDQFSPEFCSFISAC IQKNAADRSSAQTLVAHPFLSMYDDLNIDLSDYFTTAGSPLATFKQIAL
TaMKK1-1 (7DS) GHLSDIWSLGLVMLECATGNFPYPPRESFYELLEAVVDQSPSPAPSDQFSPEFCSFISAC IQKNAADRSSAQTLVAHPFLSMYDDLNIDLSDYFTTAGSPLATFKQIAL
TaMKK1-1 (syn) GHLSDIWSLGLVMLECATGNFPYPPRESFYELLEAVVDQSPSPAPSDQFSPEFCSFISAC IQKNAADRSSAQTLVAHPFLSMYDDLNIDLSDYFTTAGSPLATFKQIAL
*.:*****

1: TaMKK1-1_7AS_ 100.00 99.14 98.85 99.14
2: TaMKK1-1_4AL_ 99.14 100.00 99.14 99.43
3: TaMKK1-1_7DS_ 98.85 99.14 100.00 99.71
4: TaMKK1-1_syn_ 99.14 99.43 99.71 100.00

```

TaMKK1-1(syn) protein sequences used for Y2H interactions (blue font) did not match a nucleotide identifier from Additional File 3. Sequence was aligned with Ensembl sequences encoding TaMKK1-1 using Clustal Omega (<http://www.ebi.ac.uk/Tools/msa/clustalo/>). Percent identity of aligned sequences are also provided.

**TaMKK3-2 (clone)** **MAGLEELKKKLQPLLFDSDKGGVSTRVFPEDTCD SYVVS DGGTINLLSR SFGEYNINE HGFH KRSTGPEEPDTGEKAYRCASE DMHIFGPIGSGASSVQRAIFIPVHRILALKKINI**  
TaMKK3-2 (5BL) MAGLEELKKKLQPLLFDSDKGGVSTRVFPEDTCD SYVVS DGGTINLLSR SFGEYNINE HGFH KRSTGPEEPDTGEKAYRCASE DMHIFGPIGSGASSVQRAIFIPVHRILALKKINI  
TaMKK3-2 (5DL) MSGLEELKKKLQPLLFDSDKGGVSTRVFPEDTCD SYVVS DGGTINLLSR SFGEYNINE HGFH KRSTGPEEPDTGEKAYRCASE DMHIFGPIGSGASSVQRAIFIPVHRILALKKINI  
\*: \*\*\*\*\*

**TaMKK3-2 (clone)** **FEKEKRQQILNEMRTLCEASCYPGLVEFQGAFYMPDSGQISIALEYMDGGSLADVIRVKK SIPEPVL AHMLLKVLLGLKYLHEVRHLVHRDLK PANLLV LKGEAKITDFGVSAGLDNTM**  
TaMKK3-2 (5BL) FEKEKRQQILNEMRTLCEASCYPGLVEFQGAFYMPDSGQISIALEYMDGGSLADVIRVKK SIPEPVL AHMLLKVLLGLKYLHEVRHLVHRDLK PANLLV LKGEAKITDFGVSAGLDNTM  
TaMKK3-2 (5DL) FEKEKRQQILNEMRTLCEASCYPGLVEFQGAFYMPDSGQISIALEYMDGGSLADVIRVKK SIPEPVL AHMLLKVLLGLKYLHEVRHLVHRDLK PANLLV LKGEAKITDFGVSAGLDNTM  
\*\*\*\*\*: \*\*\*\*\*

**TaMKK3-2 (clone)** **AMCATFVGTVTYMSPERIRNENYSYAADIWSLGLTILECATGKFPYNVNEGPANLMLQILDDPSPAPPEDAYTPEFCSFINDCLRKDADARPTCEQLL SHAFIKRYEQTGVDLATYVRGV**  
TaMKK3-2 (5BL) AMCATFVGTVTYMSPERIRNENYSYAADIWSLGLTILECATGKFPYNVNEGPANLMLQILDDPSPAPPEDAYTPEFCSFINDCLRKDADARPTCEQLL SHAFIKRYEQTGVDLATYVRGV  
TaMKK3-2 (5DL) AMCATFVGTVTYMSPERIRNENYSYAADIWSLGLTILECATGKFPYNVNEGPANLMLQILDDPSPAPPEDAYTPEFCSFINDCLRKYADARPTCEQLL SHAFIKRYEQTGVDLATYVRGV  
\*\*\*\*\*: \*\*\*\*\*

**TaMKK3-2 (clone)** **VNPTERLKQIAEMLAVHYLLFNGSEGPWNMKTIFYREESSFSFGNVYVGQSAIFDTLSNIRKCLKGDRPREKIVHVVEKLCRANGETEIAIRVSGSFITGNQFLIFGEGLQAEGMPS**  
TaMKK3-2 (5BL) VNPTERLKQIAEMLAVHYLLFNGSEGPWNMKTIFYREESSFSFGNVYVGQSAIFDTLSNIRKCLKGDRPREKIVHVVEKLCRANGETEIAIRVSGSFITGNQFLIFGEGLQAEGMPS  
TaMKK3-2 (5DL) VNPTERLKQIAEMLAVHYLLFNGSEGPWDHMKTIFYREESSFSFGNVYVGQSAIFDTLSNIRKCLKGDRPREKIVHVVEKLCRANGETEIAIRVSGSFITGNQFLISGEGLQAEGMPS  
\*\*\*\*\*: \*\*\*\*\*

**TaMKK3-2 (clone)** **LEEDIDIPSKRVGQFREQFTVHPGTSMGCYYIARQDLYIIQA**  
TaMKK3-2 (5BL) LDGIDIDIPSKRVGQFREQFTVHPGTSMGCYYIAKQDLYIVQS  
TaMKK3-2 (5DL) LDEINIDIPSKRVGQFREQFTVLPGTSMGCYYIAKQDLYIVQS  
\*: \*\*\*\*\*

|                    |        |        |        |
|--------------------|--------|--------|--------|
| 1: TaMKK3-2_clone_ | 100.00 | 97.71  | 96.56  |
| 2: TaMKK3-2_5BL_   | 97.71  | 100.00 | 98.47  |
| 3: TaMKK3-2_5DL_   | 96.56  | 98.47  | 100.00 |

TaMKK3-2(clone) protein sequences used for Y2H interactions (blue font) did not match a nucleotide identifier from Additional File 3. Sequence was aligned with Ensembl sequences encoding TaMKK3-2 using Clustal Omega (<http://www.ebi.ac.uk/Tools/msa/clustalo/>). Percent identity of aligned sequences are also provided.

```

TaMKK3-3 (5AL)  MAGLEDLKRRLQPIFFDADGNVPPPAADGTSDDSSDDCEVLDSGTVNLLSRSSDEYNI SKLGFHKRTTRPDGDYATDKAYRCSCHDMHIFDSVNGASSVVHRAIYVVPVHRVLALKKI
TaMKK3-3 (5BL)  MAGLEDLKRRLQPIFFDADGNVPPPAADGTSDDSSDDCEVLDSGTVNLLSRSSDEYNI SKLGFHKRTTRPDGDYATDKAYRCSCHDMHIFDSVNGASSVVHRAIYVVPVHRVLALKKI
TaMKK3-3 (syn)  MAGLEDLKRRLQPIFFDADGNVPPPAADGTSDDSSDDCEVLDSGTVNLLSRSSDEYNI SKLGFHKRTTRPDGDYATDKAYRCCCHDMHIFDSVNGASSVVHRAIYVVPVHRVLALKKI
TaMKK3-3 (5DL)  MAGLEELKRRLQPIFFDADGNVPPPAADGTSDDSSDDCEVLDSGTVNLLSRSSDEYNI SKLGFHKRTTRPDGDYATDKAYRCCCHDMHIFDSVNGASSVVHRAIYVVPVHRVLALKKI
*****:*****

TaMKK3-3 (5AL)  SIFDKEKRQQILNEITTLAASCYPGLVEFQGFYTPDSGEIYFALEYMDGGSLADI IRV KKFITEPVLSHMLQKVLALRYLHEVRRLLVHRDIKPANLLNLKRDTKITDFGVTSGLHD
TaMKK3-3 (5BL)  NIFDKERRQQILNEIRTLAASCYPGLVEFQGVFYTPDSGEIYFALEYMDGGSLADI IRV KKFITEPVLSHMLQKVLALRYLHEVRRLLVHRDIKPANLLNLKGDTKITDFGVTSGLHD
TaMKK3-3 (syn)  NIFDKERRQQILNEIRTLAASCYPGLVEFQGVFYTPDSGEIYFALEYMDGGSLADI IRV KKFITEPVLSHMLQKVLALRYLHEVRRLLVHRDIKPANLLNLKGDTKITDFGVSSGLHD
TaMKK3-3 (5DL)  NIFDKERRQQILNEIRTLAASCYPGLVEFQGVFYTPDSGEIYFALEYMDGGSLADI IRV KKFITEPVLSHMLQKVLALRYLHEVRRLLVHRDIKPANLLNLKGDTKITDFGVSSGLHD
.*****:*****

TaMKK3-3 (5AL)  SVTMCATFLGSVTYMSPERIRNENYSYAADIWSLGLTALCATGRYPYDVNGGEADLMLQ ILEDPSPTPPQHMHSEEFCSFIDACLQKDADARPTCNELLSHSFIKKYEGPGVDLAEYNK
TaMKK3-3 (5BL)  SVTMCATFLGSVTYMSPERIRNENYSYAADIWSLGLTALCATGRYPYDVNGGEADLMLQ ILEDPSPTPPQHMHSEEFCLFIDACLQKDADARPTCDELLSHSFIKKYEGPGVDLAEYNR
TaMKK3-3 (syn)  SVTMCATFLGSVTYMSPERIRNENYSYAADIWSLGLTALCATGRYPYDVNGGEADLMLQ ILEDPSPTPPQHMHSEEFCSFIDACLQKDADARPTCDQ-----KYEGPGVDLAEYNK
TaMKK3-3 (5DL)  SVTMCATFLGSVTYMSPERIRNENYSYAADIWSLGLTALCATGRYPYDVNGGEADLMLQ ILEDPSPTPPQHMHSEEFCSFIDACLQKDADARPTCDQLLSHSFIKKYEGPGVDLAEYNK
*****:*****

TaMKK3-3 (5AL)  SVHDPAERLSQIAHMLAVHYLLIF-----HMKSFYQDSTFSFSGETHVGKSDIFDT LSRIREMLKGNRCEKIGRVMKVKYCRAGHEEGMSVRVSGSFIMGNEFLVCADGFCAEGM
TaMKK3-3 (5BL)  SVHDPAERLSQIAHMLAVHYLLIFDGGDDQWHMKSFYQDSTFSFSGETHVGKSDIFDT LSRIREMLKGNRCEKIGRVMKVKY-RAHGEEGTSVRVSGSFIMGNEFLVCADGFCAEGM
TaMKK3-3 (syn)  SVHDPAERLSQIAHMLAVHYLLIFDGGDDQWRHMKSFYQDSTFSFSGETHVGKSDIFDT LSRIREMLKGNRCEKIGRVMKVKYCRAGHEEGMSVRVSGSFIMGNEFLVCADGFCAEGM
TaMKK3-3 (5DL)  SVHDPAERLSQIAHMLAVHYLLIFDGGDDQWRHMKSFYQDSTFSFSGETHVGKSDIFDT LSRIREMLKGNRCEKIGRVMKVKYCRAGHEEGMSVRVSGSFIMGNEFLVCADGFCAEGM
*****:*****

TaMKK3-3 (5AL)  LSMVELSPDILSKQAGHFQEDFFMEPGTAMGCYVISKQELHIGVS
TaMKK3-3 (5BL)  LSIVELSPDILSKQAGHFQEDFFMEPGTAMGCYVISRQELHIGVS
TaMKK3-3 (syn)  LSIVELSPDILSKQAGHFQEDFFMEPGTAMGCYVISRQELHIGVS
TaMKK3-3 (5DL)  LSIVELSPDILSKQAGHFQEDFFMEPGTAMGCYVISRQELHIGVS
**:*:*****

```

|                         |              |              |               |              |
|-------------------------|--------------|--------------|---------------|--------------|
| 1: TaMKK3-3_5AL_        | 100.00       | 97.09        | 97.25         | 97.29        |
| 2: TaMKK3-3_5BL_        | 97.09        | 100.00       | 98.45         | 98.09        |
| 3: <b>TaMKK3-3_syn_</b> | <b>97.25</b> | <b>98.45</b> | <b>100.00</b> | <b>99.61</b> |
| 4: TaMKK3-3_5DL_        | 97.29        | 98.09        | 99.61         | 100.00       |

TaMKK3-3(syn) protein sequences used for Y2H interactions (blue font) did not match a nucleotide identifier from Additional File 3. Sequence was aligned with Ensembl sequences encoding TaMKK3-3 using Clustal Omega (<http://www.ebi.ac.uk/Tools/msa/clustalo/>). Percent identity of aligned sequences are also provided.



TaMKK4 (6DL) MRPGGPPNARPGLQQQPQGTGRARRRDLTLPQDLTSLAVPLPLPPPSSAPSSTS SS---GSGGASSMPMPSMTTPNSAGSTPPAPPPLGELERVRRVSGAGGTVWLVRHAP  
**TaMKK4 (syn)** **MRPGGPPNARPGLQQQPQGTGRARRRDLTLPQDLTSLAVPLPLPPPSSAPSSTS SSGSGSGSGGASSMPMPSMTTPNSAGSAPPAPPPLGELERVRRVSGAGGTVWLVRHAP**  
TaMKK4 (6AL) MRPGGPPNARPGLQQQPQGTGRARRRDLTLPQDLTSLAVPLPLPPPSSAPSSTS SSGSGSGSGGASSMPMPSMTTPNSAGSAPPAPPPLGELERVRRVSGAGGTVWLVRHAP  
TaMKK4 (6BL) MRPGGPPNARPGLQQQPQGTGRARRRDLTLPQDLTSLAVPLPLPPPSSAPSSTS SSGSGSGSGGASSMPMPSMTTPNSAGSAPPAPPPLGELERVRRVSGAGGTVWLVRHAP  
\*\*\*\*\*

TaMKK4 (6DL) TGRAYALKVLYGHDEAVRRQITREIAILRTAEHPSIVRCHGMYEQAGELQILLEYMDGG SLDGRR IASESFLADVARQVLSGIAYLHRRHIVHRDIKPSNLLIDCARRVKIADFGVGRI  
**TaMKK4 (syn)** **TGRAYALKVLYGHDEAVRRQITREIAILRTAEHPSIVRCHGMYEQAGELQILLEYMDGG SLDGRR IASESFLADVARQVLSGIAYLHRRHIVHRDIKPSNLLIDCARRVKIADFGVGRI**  
TaMKK4 (6AL) TGRAYALKVLYGHDEAVRRQITREIAILRTAEHPSIVRCHGMYEQAGELQILLEYMDGG SLDGRR IASESFLADVARQVLSGIAYLHRRHIVHRDIKPSNLLIDCARRVKIADFGVGRI  
TaMKK4 (6BL) TGRAYALKVLYGHDEAVRRQITREIAILRTAEHPSIVRCHGMYEQAGELQILLEYMDGG SLDGRR IASESFLADVARQVLSGIAYLHRRHIVHRDIKPSNLLIDCARRVKIADFGVGRI  
\*\*\*\*\*

TaMKK4 (6DL) LNQTMDPCNSSVGTIAYMSPERINTDLNDGNYNGYAGDIWSFGLSILEFYLRFPPLGENL GKQGDWAALMCAICYSESPAAPPTASPELRSFISCCLOKQNPAPKPSAAQLLQHRFIASPP  
**TaMKK4 (syn)** **LNQTMDPCNSSVGTIAYMSPERINTDLNDGNYNGYAGDIWSFGLSILEFYLRFPPLGENL GKQGDWAALMCAICYSESPAAPPTASPELRSFISCCLOKQNPAPKPSAAQLLQHRFIASPP**  
TaMKK4 (6AL) LNQTMDPCNSSVGTIAYMSPERINTDLNDGNYNGYAGDIWSFGLSILEFYLRFPPLGENL GKQGDWAALMCAICYSESPAAPPTASPELRSFISCCLOKQNPAPKPSAAQLLQHRFIASPP  
TaMKK4 (6BL) LNQTMDPCNSSVGTIAYMSPERINTDLNDGNYNGYAGDIWSFGLSILEFYLRFPPLGENL GKQGDWAALMCAICYSESPAAPPTASPELRSFISCCLOKQNPAPKPSAAQLLQHRFIASPP  
\*\*\*\*\*

TaMKK4 (6DL) QQQPQALAAPP  
**TaMKK4 (syn)** **QQQPQVLAAPP**  
TaMKK4 (6AL) PQQPQALAAPP  
TaMKK4 (6BL) QQQPQVLAAPP  
\*\*\*\*.\*\*\*\*\*

|                       |              |               |              |              |
|-----------------------|--------------|---------------|--------------|--------------|
| 1: TaMKK4_6DL_        | 100.00       | 98.37         | 98.91        | 98.64        |
| <b>2: TaMKK4_syn_</b> | <b>98.37</b> | <b>100.00</b> | <b>98.92</b> | <b>98.66</b> |
| 3: TaMKK4_6AL_        | 98.91        | 98.92         | 100.00       | 98.66        |
| 4: TaMKK4_6BL_        | 98.64        | 98.66         | 98.66        | 100.00       |

TaMKK4(syn) protein sequences used for Y2H interactions (blue font) did not match a nucleotide identifier from Additional File 3. Sequence was aligned with Ensembl sequences encoding TaMKK4 using Clustal Omega (<http://www.ebi.ac.uk/Tools/msa/clustalo/>). Percent identity of aligned sequences are also provided.

TaMKK5b (syn) MRPAGGS--LPA--QPGTTPGRPRRRPDLTLMPQRPDVSSSLAVPLPAPSPDRRSPRRR- - -PRPAARGPARAPPPLHELERVRRVSGAGGTVWVRHRATGRCYALKVLYGNHDDTV  
TaMKK5 (7DS) MRPAGGSSSLPAQPGTTPGRPRRRPDLTLMPQRPDVSSSLAVPLPLPPPTAAPPGA-GPAQPLVAPP--APPPLHELERVRRVSGAGGTVWVRHRATGRCYALKVLYGNHDDTV  
TaMKK5a (syn) MRPAGAG--LPA--QPGTTPGRPRRRPDLTLMPQRPDVSSSLAVPLPLPPPTAAPPGRRA--ARGPARGDPAPPPLHELERVRRVSGAGGTVWVRHRATGRCYALKVLYGNHDDAV  
TaMKK5 (7AS) MRPAGGS--LPA--QPGTTPGRPRRRPDLTLMPQRPDVSSSLAVPLPLPPPTAAPPAGPAQPLVAPPAAAPPPPLHELERVRRVSGAGGTVWVRHRATGRCYALKVLYGNHDDAV  
TaMKK5 (7BS) MRPAGIS--LPA--QPGTTPGRPRRRPDLTLMPQRPDVSSSLAVPLPLPPPTAAPP--GAAQPLVAPPAAATPPPPPLHELERVRRVSGAGGTVWVRHRATGRCYALKVLYGNHDDAV  
\*\*\*\*\* \*\* \*\*\*\*\* \* \* \*\*\*\*\* \*\*\*\*\*:\*

TaMKK5b (syn) RRQIAREIAILLRTAEHPAVVRCHGMYERGELQILLEYMDGGSGLDGRRIADEPFLAHVAR QVLSGIAYLHRRHIVHRDIKPSNLLIDSARRVKIADFGVGRILNQTMPCNSSVGTIAYM  
TaMKK5 (7DS) RRQIAREIAILLRTAEHPAVVRCHGMYERGELQILLEYMDGGSGLDGRRIADEPFLAHVAR QVLSGIAYLHRRHIVHRDIKPSNLLIDSARRVKIADFGVGRILNQTMPCNSSVGTIAYM  
TaMKK5a (syn) RRQIAREIAILLRTAEHPAVVRCHGMYERGELQILLEYMDGGSGLDGRRIADEPFLAHVAR QVLSGIAYLHRRHIVHRDIKPSNLLIDSARRVKIADFGVGRILNQTMPCNSSVGTIAYM  
TaMKK5 (7AS) RRQIAREIAILLRTAEHPAVVRCHGMYERGELQILLEYMDGGSGLDGRRIADEPFLAHVAR QVLSGIAYLHRRHIVHRDIKPSNLLIDSARRVKIADFGVGRILNQTMPCNSSVGTIAYM  
TaMKK5 (7BS) RRQIAREIAILLRTAEHPAVVRCHGMYERGELQILLEYMDGGSGLDGRRIADEPFLAHVAR QVLSGIAYLHRRHIVHRDIKPSNLLIDSARRVKIADFGVGRILNQTMPCNSSVGTIAYM  
\*\*\*\*\* \*\*\*\*\*:\*\*\*\*\*

TaMKK5b (syn) SPERINTDINDGAYDGYAGDIWSFGLSILEFYLRFPFGENLGRQGDWAALMVAICYSDP PEPSPATASPEFRGFACCLQKNPANRLSAAQLLQHPFVALPQPPLAAPPSS-  
TaMKK5 (7DS) SPERINTDINDGAYDGYAGDIWSFGLSILEFYLRFPFGENLGRQGDWAALMVAICYSDP PEPSPATASPEFRGFACCLQKNPANRLSAAQLLQHPFVALPQPPLAAPPSS  
TaMKK5a (syn) SPERINTDINDGAYDGYAGDIWSFGLSILEFYLRFPFGENLGRQGDWAALMVAICYSDP PEPSPATASPEFRGFACCLQKNPANRLSAAQLLQHPFVALPQPPLAAPPSS  
TaMKK5 (7AS) SPERINTDINDGAYDGYAGDIWSFGLSILEFYLRFPFGENLGRQGDWAALMVAICYSDP PEPSPATASPEFRGFACCLQKNPANRLSAAQLLQHPFVALPQPPLAAPPSS  
TaMKK5 (7BS) SPERINTDINDGAYDGYAGDIWSFGLSILEFYLRFPFGENLGRQGDWAALMVAICYSDP PEPSPATASPEFRGFACCLQKNPANRLSAAQLLQHPFVALPQPPLAAPPSS-  
\*\*\*\*\*

|                 |        |        |        |        |        |
|-----------------|--------|--------|--------|--------|--------|
| 1: TaMKK5b_syn_ | 100.00 | 95.00  | 93.59  | 94.77  | 95.01  |
| 2: TaMKK5_7DS_  | 95.00  | 100.00 | 95.91  | 97.97  | 97.95  |
| 3: TaMKK5a_syn_ | 93.59  | 95.91  | 100.00 | 94.80  | 95.91  |
| 4: TaMKK5_7AS_  | 94.77  | 97.97  | 94.80  | 100.00 | 99.13  |
| 5: TaMKK5_7BS_  | 95.01  | 97.95  | 95.91  | 99.13  | 100.00 |

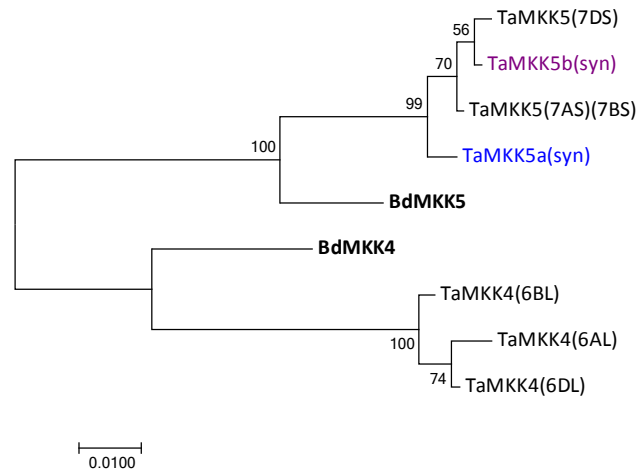

TaMKK5a(syn) and TaMKK5b(syn) protein sequences used for Y2H interactions (blue font) did not match a nucleotide identifier from Additional File 3. Sequence was aligned with Ensembl sequences encoding TaMKK5 using Clustal Omega (<http://www.ebi.ac.uk/Tools/msa/clustalo/>). Percent identity of aligned sequences are also provided. Since percent identity is low for synthetic TaMKK5s compared with variability with genomic copies, the phylogenetic analysis (Clade C MKK branch shown above) shows relationship between TaMKK5a and 5b with MKK5.

```

TaMKK10-2 (syn)      MALVRQRRQLPHLTLPLDHFALRAPP-PAVAP---CEGLARLSDYERISQLGQGNGG TVFKARHRRTAQQVALKLF- ---DPSAAREAEILMLASGAPHVVR LHAVIPSPAAEQPA
TaMKK10-2 (4AS)      MALVRQRRQLPHLTLPLDHFALRAPPPLPPAVAPCAPAEGLARLSDYERISQLGQGNGG TVFKARHRRTAQHFKLFAAGDGDPSAAREAEILMLASGAPHVVR LHAVIPSPAAEQPA
TaMKK10-2 (4BL)      MALVRQRRQLPHLTLPLDHFALRAPP-PPPAVAPC---EGLARLSDYERISQLGQGNGG TVFKARHRRTAQQVALKLFAGDGDPSAAREAEILMLASGAPHVVR LHAVIPSPAAEQPA
TaMKK10-2 (4DL)      MALVRQRRQLPHLTLPLDHFALRAPP-PPPAVAPC---EGLARLSDYERISQLGQGNGG TVFKARHRRTAQQVALKLFAGDGDPSAAREAEILMLASGAPHVVR LHAVIPSPAAEQPA
*****
TaMKK10-2 (syn)      ALASSVSGGSLAGLLRRLGRPMGERPIAAVARQALLGLAALHALRVVHRDLK PANLLVG AGGEVKIADFGAGKVLRRRLDPCASYVGTAA YMSPERFDPEAYSGDYDPYAADVWSLGMA
TaMKK10-2 (4AS)      ALALELVSGGSLAGLLRRLGRPMGERPIAAVARQALLGLAALHALRVVHRDLK PANLLVG AGGEVKIADFGAGKVLRRRLDPCASYVGTAA YMSPERFDPEAYSGDYDPYAADVWSLGMA
TaMKK10-2 (4BL)      ALALELVSGGSLAGLLRRLGRPMGERPIAAVARQALLGLAALHALRVVHRDLK PANLLVG AGGEVKIADFGAGKVLRRRLDPCASYVGTAA YMSPERFDPEAYSGDYDPYAADVWSLGMA
TaMKK10-2 (4DL)      ALALELVSGGSLAGLLRRLGRPMGERPIAAVARQALLGLAALHALRVVHRDLK PANLLVG AGGEVKIADFGAGKVLRRRLDPCASYVGTAA YMSPERFDPEAYSGDYDPYAADVWSLGMA
***
TaMKK10-2 (syn)      ILELYLGHFPLL PAGQRPDWAALMCAICFGEAPEAPAAASDEF RDFVARCLEKKAGRRAS VAELLQHPFIAERDAEEAQRCLAALVAEAAELGDQ
TaMKK10-2 (4AS)      ILELYLGHFPLL PAGQRPDWAALMCAICFGEAPEAPAAASDEF RDFVARCLEKKAGRRAS VAELLQHPFIAERDAEEAQRCLAALVAEAAELGDQ
TaMKK10-2 (4BL)      ILELYLGHFPLL PAGQRPDWAALMCAICFGEAPEAPAAASDEF RDFVARCLEKKAGRRAS VAELLQHPFIAERDAEEAQRCLAALVAEAAELGDQ
TaMKK10-2 (4DL)      ILELYLGHFPLL PAGQRPDWAALMCAICFGEAPEAPAAASDEF RDFVARCLEKKAGRRAS VAELLQHPFIAERDAEEAQRCLAALVAEAAELGDQ
*****

```

|                   |        |        |        |        |
|-------------------|--------|--------|--------|--------|
| 1: TaMKK10-2_syn_ | 100.00 | 97.55  | 98.15  | 98.77  |
| 2: TaMKK10-2_4AS_ | 97.55  | 100.00 | 98.49  | 99.10  |
| 3: TaMKK10-2_4BL_ | 98.15  | 98.49  | 100.00 | 99.40  |
| 4: TaMKK10-2_4DL_ | 98.77  | 99.10  | 99.40  | 100.00 |

TaMKK10-2(syn) protein sequences used for Y2H interactions (blue font) did not match a nucleotide identifier from Additional File 3. Sequence was aligned with Ensembl sequences encoding TaMKK10-2 using Clustal Omega (<http://www.ebi.ac.uk/Tools/msa/clustalo/>). Percent identity of aligned sequences are also provided.

**TaMPK4 (clone)** **MDTS-GGGTAAGGAAQIQGMATHGGRYVLYNVYGNLFEVASKYAPPPIRPIGRGAYGIVCA AVSSDTGEEVAIKKIGNAFDNHIDAKRTLREIKLLRHMDHENILAIKDLIRPPRRDDFKD**  
TaMPK4 (1AL) MDTSGGGGGAAGGAAQIQGMATHGGRYVLYNVYGNLFEVASKYAPPPIRPIGRGAYGIVCA AVSSDTGEEVAIKKIGNAFDNHIDAKRTLREIKLLRHMDHENILAIKDLIRPPRRDDFKD  
TaMPK4 (1BL) MDTSGGGGGAAGGAAQIQGMATHGGRYVLYNVYGNLFEVASKYAPPPIRPIGRGAYGIVCA AVSSDTGEEVAIKKIGNAFDNHIDAKRTLREIKLLRHMDHENILAIKDLIRPPRRDDFKD  
TaMPK4 (1DL) MDTSGGGGGAAGGAAQIQGMATHGGRYVLYNVYGNLFEVASKYAPPPIRPIGRGAYGIVCA AVSSDTGEEVAIKKIGNAFDNHIDAKRTLREIKLLRHMDHENILAIKDLIRPPRRDDFKD  
\*\*\*\* \*\*

**TaMPK4 (clone)** **VYIVTELMDTDLHQIIRSNQSLTDDHCQYFLYQLLRGLKYVHSANVLHRDLKPSNLFNA NCDLKIADFLGARTTSETDLMTYVTRWYRAPELLNCSQYTAADVWSVGCILGEIIT**  
TaMPK4 (1AL) VYIVTELMDTDLHQIIRSNQSLTDDHCQYFLYQLLRGLKYVHSANVLHRDLKPSNLFNA NCDLKIADFLGARTTSETDLMTYVTRWYRAPELLNCSQYTAADVWSVGCILGEIIT  
TaMPK4 (1BL) VYIVTELMDTDLHQIIRSNQSLTDDHCQYFLYQLLRGLKYVHSANVLHRDLKPSNLFNA NCDLKIADFLGARTTSETDLMTYVTRWYRAPELLNCSQYTAADVWSVGCILGEIIT  
TaMPK4 (1DL) VYIVTELMDTDLHQIIRSNQSLTDDHCQYFLYQLLRGLKYVHSANVLHRDLKPSNLFNA NCDLKIADFLGARTTSETDLMTYVTRWYRAPELLNCSQYTAADVWSVGCILGEIIT  
\*\*\*\*\*

**TaMPK4 (clone)** **RQPLFPGRDYIQQLKLITELIGSPDDSSLGFLRSDNARRYMKQLPQYPRQDFRLRFRNMS DGAVDLLERMLVFDPSRRITVDEALHHPYLASLHDINEEPTCPAPFSDFEQPSFTEEHM**  
TaMPK4 (1AL) RQPLFPGRDYIQQLKLITELIGSPDDSSLGFLRSDNARRYMKQLPQYPRQDFRLRFRNMS DGAVDLLERMLVFDPSRRITVDEALHHPYLASLHDINEEPTCPAPFSDFEQPSFTEEHM  
TaMPK4 (1BL) RQPLFPGRDYIQQLKLITELIGSPDDSSLGFLRSDNARRYMKQLPQYPRQDFRLRFRNMS DGAVDLLERMLVFDPSRRITVDEALHHPYLASLHDINEEPTCPAPFSDFEQPSFTEEHM  
TaMPK4 (1DL) RQPLFPGRDYIQQLKLITELIGSPDDSSLGFLRSDNARRYMKQLPQYPRQDFRLRFRNMS DGAVDLLERMLVFDPSRRITVDEALHHPYLASLHDINEEPTCPAPFSDFEQPSFTEEHM  
\*\*\*\*\*

**TaMPK4 (clone)** **KELIWRETLAFNPEILPT**  
TaMPK4 (1AL) KELIWRETLAFNPDPPY-  
TaMPK4 (1BL) KELIWRETLAFNPDPPY-  
TaMPK4 (1DL) KELIWRETLAFNPDPPY-  
\*\*\*\*\*

|                         |               |              |              |              |
|-------------------------|---------------|--------------|--------------|--------------|
| <b>1: TaMPK4_clone_</b> | <b>100.00</b> | <b>98.40</b> | <b>98.67</b> | <b>98.40</b> |
| 2: TaMPK4_1AL_          | 98.40         | 100.00       | 99.73        | 99.73        |
| 3: TaMPK4_1BL_          | 98.67         | 99.73        | 100.00       | 99.73        |
| 4: TaMPK4_1DL_          | 98.40         | 99.73        | 99.73        | 100.00       |

TaMPK4(clone) protein sequences used for Y2H interactions (blue font) did not match a nucleotide identifier from Additional File 3. Sequence was aligned with Ensembl sequences encoding TaMPK4 using Clustal Omega (<http://www.ebi.ac.uk/Tools/msa/clustalo/>). Percent identity of aligned sequences are also provided.

**TaMPK17 (clone)** MGGGNGIVDGFRRSFHRRTPSGSVLGSNNQSSAGEDSSDVEAAEGLDLVGLRSIRVPKRK MPLPVESHKKNIMEKEFFTEYGEASQYQIQEVVVGKGSYGVVAAAIDTRTGERVAIKKIND  
TaMPK17 (7DL) MGGGNGIVDGFRRLFHRRTPSGSVLGSNNQSSAGEDSSDVEAAEGLDLVGLRSIRVPKRK MPLPVESHKKNIMEKEFFTEYGEASQYQIQEVVVGKGSYGVVAAAIDTRTGERVAIKKIND  
TaMPK17 (7AL) MGGGNGIVDGFRRLFHRRTPSGSVLGSNNQSSAGEDSSDVEAAEGLDLVGLRPIRVPKRK MPLPVESHKKNIMEKEFFTEYGEASQYQIQEVVVGKGSYGVVAAAIDTRTGERVAIKKIND  
TaMPK17 (U) MGGGNGIVDGFRRLFHRRTPSGSVLGSNNQSSAGEDSSDVEAEDLDLVGLRPIRVPKRK MPLPVESHKKNIMEKEFFTEYGEASQYQIQEVVVGKGSYGVVAAAIDTRTGERVAIKKIND  
\*\*\*\*\* . \* . \*\*\*\*\*

**TaMPK17 (clone)** VFEHVSDATRILREVKLLRLLRHPDVVEIKHIMLPPSRREFQDIYVVFELMESDLHQVIR ANDDLTAEHYQFFLYQLLRALKYIHGANVFHRDLKPKNILANADCKLKI CDFGLARVSN  
TaMPK17 (7DL) VFEHVSDATRILREVKLLRLLRHPDVVEIKHIMLPPSRREFQDIYVVFELMESDLHQVIR ANDDLTAEHYQFFLYQLLRALKYIHGANVFHRDLKPKNILANADCKLKI CDFGLARVSN  
TaMPK17 (7AL) VFEHVSDATRILREVKLLRLLRHPDVVEIKHIMLPPSRREFQDIYVVFELMESDLHQVIR ANDDLTAEHYQFFLYQLLRALKYIHGANVFHRDLKPKNILANADCKLKI CDFGLARVSN  
TaMPK17 (U) VFEHVSDATRILREVKLLRLLRHPDVVEIKHIMLPPSRREFQDIYVVFELMESDLHQVIR ANDDLTAEHYQFFLYQLLRALKYIHGANVFHRDLKPKNILANADCKLKI CDFGLARVSN  
\*\*\*\*\*

**TaMPK17 (clone)** DAPSAIFWTDYVATRWRAPELCGSFFSKYTPAIDIWSIGCIFAELLTGRPLFPKKNVVH QLDIITDLLGTPSSETLSRIRNEKARRYLSMRKKHPVPLTQKFPNADPLAVRLLGRLLA  
TaMPK17 (7DL) DAPSAIFWTDYVATRWRAPELCGSFFSKYTPAIDIWSIGCIFAELLTGRPLFPKKNVVH QLDIITDLLGTPSSETLSRIRNEKARRYLSMRKKHPVPLTQKFPNADPLAVRLLGRLLA  
TaMPK17 (7AL) DAPSAIFWTDYVATRWRAPELCGSFFSKYTPAIDIWSIGCIFAELLTGRPLFPKKNVVH QLDIITDLLGTPSSETLSRIRNEKARRYLSMRKKHPVPLTQKFPNADPLAVRLLGRLLA  
TaMPK17 (U) DAPSAIFWTDYVATRWRAPELCGSFFSKYTPAIDIWSIGCIFAELLTGRPLFPKKNVVH QLDIITDLLGTPSSETLSRIRNEKARRYLSMRKKHPVPLTQKFPNADPLAVRLLGRLLA  
\*\*\*\*\*

**TaMPK17 (clone)** FDPKDRPSAEEALADPYFASLANVEREPSRHPISKLEFEFERRKVTKDDVRELIYREILE YHPQMLEEYMKGGQISFLYPSGVDRFKRQFAHLEEHYSKGERGSPQRKHASLPRQRVG  
TaMPK17 (7DL) FDPKDRPSAEEALADPYFASLANVEREPSRHPISKLEFEFERRKVTKDDVRELIYREILE YHPQMLEEYMKGGQISFLYPSGVDRFKRQFAHLEEHYSKGERGSPQRKHASLPRQRVG  
TaMPK17 (7AL) FDPKDRPSAEEALADPYFASLANVEREPSRHPISKLEFEFERRKVTKDDVRELIYREILE YHPQMLEEYMKGGQISFLYPSGVDRFKRQFAHLEEHYSKGERGSPQRKHASLPRQRVG  
TaMPK17 (U) FDPKDRPSAEEALADPYFASLANVEREPSRHPISKLEFEFERRKVTKDDVRELIYREILE YHPQMLEEYMKGGQISFLYPSGVDRFKRQFAHLEEHYSKGERGSPQRKHASLPRQRVG  
\*\*\*\*\*

**TaMPK17 (clone)** ASNDGNNEQHISDQEMSAEPDAHGAVSPQKSQDAPGVGQNGLSPTSLSSRTYLKSASISA SKCVVNPKNQPEYDDAISEETEGAVDGLSEKVS KMHA  
TaMPK17 (7DL) ASNDGNNEQHISDQEMSAEPDAHGAVSPQKSQDAPGVGQNGLSPTSLSSRTYLKSASISA SKCVVNPKNQPEYDDAISEETEGAVDGLSEKVS KMHA  
TaMPK17 (7AL) ASNDGNNEQHISDQEMSAEPDAHGAVSPQKSQDAPGVGQNGLSPTSLSSRTYLKSASISA SKCVVNPKNQPEYDDAISEETEGAVDGLSEKVS KMHA  
TaMPK17 (U) ASNDGNNEQHISDQEMSAEPDAHGAVSPQKSQDAPSVGPNGLSPTSLSSRTYLKSASISA SKCVVNPKNQPEYDDAISEETEGAVDGLSEKVS KMHA  
\*\*\*\*\*

|                  |        |        |        |        |
|------------------|--------|--------|--------|--------|
| 1: TaMPK17_clone | 100.00 | 99.31  | 99.13  | 98.79  |
| 2: TaMPK17_7DL   | 99.31  | 100.00 | 99.13  | 98.79  |
| 3: TaMPK17_7AL   | 99.13  | 99.13  | 100.00 | 99.31  |
| 4: TaMPK17_U     | 98.79  | 98.79  | 99.31  | 100.00 |

TaMPK7(clone) protein sequences used for Y2H interactions (blue font) did not match a nucleotide identifier from Additional File 3. Sequence was aligned with Ensembl sequences encoding TaMPK7 using Clustal Omega (<http://www.ebi.ac.uk/Tools/msa/clustalo/>). Percent identity of aligned sequences are also provided.

**TaMPK20-2 (clone)** **MQQAQRSKGS**AEADFFTEYGDANRYKIQEVI**GKGSYGVVCSALDLQTRQKVAIKKIHNIF EHTSDAARILREIKLLRLLRHPDVVEIKHIMLPPSRKDFKDIYVVFELMESDLHQVIKAN**  
TaMPK20-2 (1AL) MQQAQR**TKSSAEVDF**FFTEYGDANRYKIQEVI**GKGSYGVVCSALDLQTRQKVAIKKIHNIF EHTSDAARILREIKLLRLLRHPDVVEIKHIMLPPSRKDFKDIYVVFELMESDLHQVIKAN**  
TaMPK20-2 (1BL) MQQAQR**SKGS**AEADFFTEYGDANRYKIQEVI**GKGSYGVVCSALDLQTRQKVAIKKIHNIF EHTSDAARILREIKLLRLLRHPDVVEIKHIMLPPSRKDFKDIYVVFELMESDLHQVIKAN**  
TaMPK20-2 (1DL) MQQAQR**SKSSAEVDF**FFTEYGDANRYKIQEVI**GKGSYGVVCSALDLQTRQKVAIKKIHNIF EHTSDAARILREIKLLRLLRHPDVVEIKHIMLPPSRKDFKDIYVVFELMESDLHQVIKAN**  
\*\*\*\*\*:\*.\*\*\*.\*\*\*\*\*

**TaMPK20-2 (clone)** **DDLTKEHYQFFLYQLLRALKYIHTASVYHRDLKPKNILANSNCKLKICDFGLARVAFNDT PTTVFWDYVATRWYRAPEL**CGSFFTKYTPAID**WISIGCIFA**EVLTGKPL**FP**GK**NAVHQL**  
TaMPK20-2 (1AL) DDLTKEHYQFFLYQLLRALKYIHTASVYHRDLKPKNILANSNCKLKICDFGLARVAFNDT PTTVFWDYVATRWYRAPELCGSFFTKYTPAIDWISIGCIFA**EVLTGKPLFP**GK**NVVHQL**  
TaMPK20-2 (1BL) DDLTKEHYQFFLYQLLRALKYIHTASVYHRDLKPKNILANSNCKLKICDFGLARVAFNDT PTTVFWDYVATRWYRAPELCGSFFTKYTPAIDWISIGCIFA**EVLTGKPLFP**GK**NVVHQL**  
TaMPK20-2 (1DL) DDLTKEHYQFFLYQLLRALKYIHTASVYHRDLKPKNILANSNCKLKICDFGLARVAFNDT PTTVFWDYVATRWYRAPELCGSFFTKYTPAIDWISIGCIFA**EVLTGKPLFP**GK**NVVHQL**  
\*\*\*\*\*.\*\*\*\*\*

**TaMPK20-2 (clone)** **DLMTDLLGTPSMDTISRVRNEKARRYLSMRKKDPVPF**SQK**FPNADPLG**VK**LLEKLLAFD PKDRPTAE**EAL**TD**PF**FRGLSKPERE**PS**QPIRKME**FD**FEHSR**SK**DDIRELIFQE**I**LEYH**  
TaMPK20-2 (1AL) DLMTDLLGTPSMDTISRVRNEKARRYLSMRKKDPVPF**SQKFPNADPLG**VK**LLEKLLAFD PKDRPTAE**EAL**TD**PF**FRGLSKPERE**PS**QPIRKME**FD**FEHSR**SK**DDIRELIFQE**I**LEYH**  
TaMPK20-2 (1BL) DLMTDLLGTPSMDTISRVRNEKARRYLSMRKKDPVPF**SQKFPNADPLG**VK**LLEKLLAFD PKDRPTAE**EAL**TD**PF**FRGLSKPERE**PS**QPIRKME**FD**FEHSR**SK**DDIRELIFQE**I**LEYH**  
TaMPK20-2 (1DL) DLMTDLLGTPSMDTISRVRNEKARRYLSMRKKDPVPF**SQKFPNADPLG**VK**LLEKLLAFD PKDRPTAE**EAL**TD**PF**FRGLSKPERE**PS**QPIRKME**FD**FEHSR**SK**DDIRELIFQE**I**LEYH**  
\*\*\*\*\*.\*\*\*\*\*

**TaMPK20-2 (clone)** **PQLLKS**YVDG**TERTTFLYPSAVDHF**KK**QFSHLEESD**SG**SPVVPADRKHASLPR**STIV**HSA PISAKDTRPLFGKPCSKTSSETGRYAGN**RGAS**QASHAAQAVV**SRRA**AGSALPYDAASRP**  
TaMPK20-2 (1AL) PQLLKS**YVDG**TERTTFLYPSAVDHF**KKQFSHLEESD**SG**SPVVPADRKHASLPR**STIV**HSA PISAKDTRPLFGKPCSKTSSETGRYAGN**RGAS**QASHAAQAVV**SRRA**AGSALPYDAASRP**  
TaMPK20-2 (1BL) PQLLKS**YTDG**TERTTFLYPSAVDHF**KKQFSHLEESD**SG**SPVVPADRKHASLPR**STIV**HST PIPAKDTRPLFGKPCSKTSSETGRYAGN**GHGAS**QASHAAQAVI**SRRA**AGSALPYDAASRP**  
TaMPK20-2 (1DL) PQLLKS**YIDG**TERTTFLYPSAVDHF**KKQFSHLEESD**SG**SPVVPADRKHASLPR**STIV**HST PIPAKDTRPLFGKPCSKTSSETGRYAGN**GHGAS**QASHAAQAVV**SRRA**AGSALPYDAASRP**  
\*\*\*\*\*.\*\*\*\*\*

**TaMPK20-2 (clone)** **TISPGCPPQQQIPQMYGQYQHQA**PA---**GAGIPQAMGGYACGGYTKGTAPNAA-AAPAM RAPPYRHL**PAG**QKNGPLDRLAVET**TD**IYTRSLNGIVAAAAASAGTAS**AHR**KVGAVPFGMPTTY**  
TaMPK20-2 (1AL) TISPGCPPQQQIPQMYGQYQHQA**PA---GAGIPQAMGGYACGGYTKGTAPNAA-AAPAM RAPPYRHL**PAG**QKNGPLDRLAVET**TD**IYTRSLNGIVAAAAASAGTAS**AHR**KVGAVPFGMPTTY**  
TaMPK20-2 (1BL) TISPGCPPQQQIPQMYGQYQHQA**PPGAGAGAGIPQAMGGYACGGYTKGTAPNAAAAAPAM RAPPYRHL**P**TGQKNGPLDRLAVET**TD**IYTRSLNGIVAAAAASAGATGA**AHR**KVGAVPFGMPTTY**  
TaMPK20-2 (1DL) TISPGCP-QQQIPQMYGQYQHQA**APGA--GAGIPQTMGGYACGGYTKGTAPNAA-AAPAM RAPPYRHL**PAG**QKNGPLDRLAVET**TD**IYTRSLNGIVAAAAASAGATS**AHR**KVGAVPFGMPTTY**  
\*\*\*\*\*.\*\*\*\*\*

|                    |        |        |        |        |
|--------------------|--------|--------|--------|--------|
| 1: TaMPK20-2_clone | 100.00 | 99.16  | 97.83  | 97.49  |
| 2: TaMPK20-2_1AL   | 99.16  | 100.00 | 97.66  | 97.99  |
| 3: TaMPK20-2_1BL   | 97.83  | 97.66  | 100.00 | 98.50  |
| 4: TaMPK20-2_1DL   | 97.49  | 97.99  | 98.50  | 100.00 |

TaMPK20-2(clone) protein sequences used for Y2H interactions (blue font) did not match a nucleotide identifier from Additional File 3. Sequence was aligned with Ensembl sequences encoding TaMPK20-2 using Clustal Omega (<http://www.ebi.ac.uk/Tools/msa/clustalo/>). Percent identity of aligned sequences are also provided.

```

TaMPK20-3 (7DL)      MQNNDLRKKSAAEIDFFTEYGDTNRYKVLEVIIGKGSYGLVCSANDTQTGEKVAIKKIHNI FEHISDAARILREIKLLRLLRHPDVVEIKHILLPPSKKDFKDIYVVFELMESDLHQVIKA
TaMPK20-3 (clone) MQNNDLRKKSAAEIDFFTEYGDTNRYKVLEVIIGKGSYGLVCSANDTQTGEKVAIKKIHNI FEHISDAARILREIKLLRLLRHPDVVEIKHILLPPSKKDFKDIYVVFELMESDLHQVIKA
TaMPK20-3 (7AL)      MQNGDLRKKSAAEIDFFTEYGDTNRYKVLEVIIGKGSYGLVCSANDTQTGEKVAIKKIHNI FEHISDAARILREIKLLRLLRHPDVVEIKHILLPPSKKDFKDIYVVFELMESDLHQVIKA
TaMPK20-3 (7BL)      MQNSDLRKKSAAEIDFFTEYGDTNRYKVLEVIIGKGSYGLVCSANDTQTGEKVAIKKIHNI FEHISDAARILREIKLLRLLRHPDVVEIKHILLPPSKKDFKDIYVVFELMESDLHQVIKA
***.*****

TaMPK20-3 (7DL)      NDDLTREHYQFFLYQMLRALRYMHTANVYHRDLKPKNVLANANCKLKICDFGLARVAFND APTTVFWTDYVATRWRAPELCGSFYSKYTPAIDIWSIGCIFAEVLIQKPLFPKGNVNHQ
TaMPK20-3 (clone) NDDLTREHYQFFLYQMLRALRYMHTANVYHRDLKPKNVLANANCKLKICDFGLARVAFND APTTVFWTDYVATRWRAPELCGSFYSKYTPAIDIWSIGCIFAEVLIQKPLFPKGNVNHQ
TaMPK20-3 (7AL)      NDDLTREHYQFFLYQMLRALRYMHTANVYHRDLKPKNVLANANCKLKICDFGLARVAFND APTTVFWTDYVATRWRAPELCGSFYSKYTPAIDIWSIGCIFAEVLIQKPLFPKGNVNHQ
TaMPK20-3 (7BL)      NDDLTREHYQFFLYQMLRALRYMHTANVYHRDLKPKNVLANANCKLKICDFGLARVAFND APTTVFWTDYVATRWRAPELCGSFYSKYTPAIDIWSIGCIFAEVLIQKPLFPKGNVNHQ
*****

TaMPK20-3 (7DL)      LDLITDVLGTPSLDAISQVRNDKARKYLTCMRKKQPASFSQKFPKADPLALRLLRLLAF DPKDRPSAEEALADPYFNGLAKVEREPCQPIPKLEFEFEGRRVTKEDIKELIFEEILEY
TaMPK20-3 (clone) LDLITDVLGTPSLDAISQVRNDKARKYLTCMRKKQPASFSQKFPKADPLALRLLRLLAF DPKDRPSAEEALADPYFNGLAKVEREPCQPIPKLEFEFEGRRVTKEDIKELIFEEILEY
TaMPK20-3 (7AL)      LDLITDVLGTPSLDAISQVRNDKARKYLTCMRKKQPASFSQKFPKADPLALRLLRLLAF DPKDRPSAEEALADPYFNGLAKVEREPCQPIPKLEFEFEGRRVTKEDIKELIFEEILEY
TaMPK20-3 (7BL)      LDLITDVLGTPSLDAISQVRNDKARKYLTCMRKKQPASFSQKFPKADPLALRLLRLLAF DPKDRPSAEEALADPYFNGLAKVEREPCQPIPKLEFEFEGRRVTKEDIKELIFEEILEY
*****

TaMPK20-3 (7DL)      HPQLLKEHISGTDRRNFVHLSAVDQFKKRFAELEENGGENGSAVSTQRKHSSSLPRQSFNPR
TaMPK20-3 (clone) HPQLLKEHISGTDRRNFVHLSAVDQFKKRFAELEENGGENGSAVSSQRKHSSSLPRQSFNPR
TaMPK20-3 (7AL)      HPQLLKEHISGTDRRNFVHLSAVDQFKKRFAELEENGGENGSAVSSQRKHSSSLPRQSFNPH
TaMPK20-3 (7BL)      HPQLLKEHISGTDRRNFVHLSAVDQFKKRFAELEENGGENGSAVSSQRKHSSSLPRQSFNPE
*****

```

|                           |              |               |              |              |
|---------------------------|--------------|---------------|--------------|--------------|
| 1: TaMPK20-3_7DL          | 100.00       | 99.76         | 99.05        | 99.29        |
| <b>2: TaMPK20-3_clone</b> | <b>99.76</b> | <b>100.00</b> | <b>99.29</b> | <b>99.52</b> |
| 3: TaMPK20-3_7AL          | 99.05        | 99.29         | 100.00       | 99.52        |
| 4: TaMPK20-3_7BL          | 99.29        | 99.52         | 99.52        | 100.00       |

TaMPK20-3(clone) protein sequences used for Y2H interactions (blue font) did not match a nucleotide identifier from Additional File 3. Sequence was aligned with Ensembl sequences encoding TaMPK20-3 using Clustal Omega (<http://www.ebi.ac.uk/Tools/msa/clustalo/>). Percent identity of aligned sequences are also provided.

**TaMPK20-4 (clone)** **-MPEANAGARGGGEQRSKVVSSDVMSEFFSEYGDANRYKIEEIIIGKGSYGVVCSAIDRQTG DRVAIKKVSNI FEHITDAARMLREIKFLRLLRHPDIVQIKHIMLPPSRRDYKDI FVVVFEL**  
TaMPK20-4 (3AL) ----M-----QPDQNQRRKGSSEMDFFSEYGDANRYKIQEVIGKGSYGVVCSAIDQHTG DKVAIKKIHNIFEHLSDAARILREIKLLCLRHPDIVEIRHIMLPPSRRDFKDIYVVFEL  
TaMPK20-4 (3DL) MQPD-----QHQQQRRKGSSEMDFFSEYGDANRYKIQEVIGKGSYGVVCSAIDQHTG DKVAIKKIHNIFEHLSDAARILREIKLLCLRHPDIVEIRHIMLPPSRRDFKDIYVVFEL  
AK333309.1 MQPDQ-----QQHQHQRRKGSSEMDFFSEYGDANRYKIQEVIGKGSYGVVCSAIDQHTG DKVAIKKIHNIFEHLSDAARILREIKLLCLRHPDIVEIRHIMLPPSRRDFKDIYVVFEL  
TaMPK20-4 (3B) MQPDQ-----QQHQHQRRKGSSEMDFFSEYGDANRYKIQEVIGKGSYGVVCSAIDQHTG DKVAIKKIHNIFEHLSDAARILREIKLLCLRHPDIVEIRHIMLPPSRRDFKDIYVVFEL  
::: .: .: \* . \* .\*\*\*\*\* .\*\*\*\*\*:\*\*\*\*\*:\*\*\*\*\*:\*\*\*\*\*:\*\*\*\*\*:\*\*\*\*\*:\*\*\*\*\*:\*\*\*\*\*:\*\*\*\*\*:\*\*\*\*\*:\*\*\*\*\*:\*\*\*\*\*:\*\*\*\*\*:\*\*\*\*\*

**TaMPK20-4 (clone)** **MDTDLHQVIKANDDLTKEHYQFFLYQMLRALKYIHTANVYHRDLKPKNILANANCKLKIC DFGLARVAFNDTPTTFVFTDYVATRWYRAPELCSFFTKYSPAIDTWSIGCIFAELTGG**  
TaMPK20-4 (3AL) MDTDLHQVIKANDDLTKEHHQFFLYQMLRALKYIHTANVYHRDLKPKNILANANCKLKIC DFGLARVAFNDTPTTFVFTDYVATRWYRAPELCSFFTKYSPAIDIWSIGCIFAELTGG  
TaMPK20-4 (3DL) MDTDLHQVIKANDDLTKEHHQFFLYQMLRALKYIHTANVYHRDLKPKNILANANCKLKIC DFGLARVAFNDTPTTFVFTDYVATRWYRAPELCSFFTKYSPAIDIWSIGCIFAELTGG  
AK333309.1 MDTDLHQVIKANDDLTKEHHQFFLYQMLRALKYIHTANVYHRDLKPKNILANANCKLKIC DFGLARVAFNDTPTTFVFTDYVATRWYRAPELCSFFTKYSPAIDIWSIGCIFAELTGG  
TaMPK20-4 (3B) MDTDLHQVIKANDDLTKEHHQFFLYQMLRALKYIHTANVYHRDLKPKNILANANCKLKIC DFGLARVAFNDTPTTFVFTDYVATRWYRAPELCSFFTKYSPAIDIWSIGCIFAELTGG  
\*\*\*\*\*:\*\*\*\*\*:\*\*\*\*\*:\*\*\*\*\*:\*\*\*\*\*:\*\*\*\*\*:\*\*\*\*\*:\*\*\*\*\*:\*\*\*\*\*:\*\*\*\*\*:\*\*\*\*\*:\*\*\*\*\*:\*\*\*\*\*:\*\*\*\*\*

**TaMPK20-4 (clone)** **PLFPGKNVVQQLDMMTDFLGSFSPPEIISRIRNEKARRYLSMRKKLPVPFSEKPKADPA AVKLLQKLLAFDPKDRPTAEALADPYFNGLAKVEREPCQPI SKMEFEFERKFTREDV**  
TaMPK20-4 (3AL) PLFPGKNVVHQLDLMTDLLGTPSLDITVSRIRNEKARRYLSMRKKQPVCFSERFPKADPA ALKLMQRLLAFDPKDRPTAEALADPYFKGLGKVEREPCQPI SKFEFEFERKKTEDV  
TaMPK20-4 (3DL) PLFPGKNVVHQLDLMTDLLGTPSLDITVSRIRNEKARRYLSMRKKQPVCFSERFPKADPA ALKLMQRLLAFDPKDRPTAEALADPYFKGLGKVEREPCQPI SKFEFEFERKKTEDV  
AK333309.1 PLFPGKNVVHQLDLMTDLLGTPSLDITVSRIRNEKARRYLSMRKKQPVCFSERFPKADPA ALKLMQRLLAFDPKDRPTAEALADPYFKGLGKVEREPCQPI SKFEFEFERKKTEDV  
TaMPK20-4 (3B) PLFPGKNVVHQLDLMTDLLGTPSLDITVSRIRNEKARRYLSMRKKQPVCFSERFPKADPA AFKLMQRLLAFDPKDRPTAEALADPYFKGLGKVEREPCQPI SKFEFEFERKKTEDV  
\*\*\*\*\*:\*\*\*\*\*:\*\*\*\*\*:\*\*\*\*\*:\*\*\*\*\*:\*\*\*\*\*:\*\*\*\*\*:\*\*\*\*\*:\*\*\*\*\*:\*\*\*\*\*:\*\*\*\*\*:\*\*\*\*\*:\*\*\*\*\*:\*\*\*\*\*

**TaMPK20-4 (clone)** **KELIFREILEYHPQLLDKDYNGSEKTNFLYPSAVDNFRQQFANLEEDGGKGA---AERK HVSLPRTTIVHSTPVPPTTNCPASQAPQRIPAAARPGRVIASATPTENAFTDRQMGRMAR**  
TaMPK20-4 (3AL) KELIFREILEYHPQLLDKDYNGTEKTNFLYPSAVDNFRQQFANLEENGKGGAI VPSDRK HVSLPRTTIVHSTP IPPKQKSSQVQRIPTGRPGRVVGPIPFENSCAMPYQRRVAR  
TaMPK20-4 (3DL) KELIFREILEYHPQLLDKDYNGTEKTNFLYPSAVDNFRQQFANLEENGKGGAI VPSDRK HVSLPRTTIVHSTP IPPKQKSSQVQRIPTGRPGRVVGPIPFENSCAMPYQRRVAR  
AK333309.1 -----  
TaMPK20-4 (3B) KELIFREILEYHPQLLDKDYNGTEKTNFLYPSAVDNFRQQFANLEENGKGGAI VPSDRK HVSLPRTTIVHSTP IPPKQKSSQVQRIPTGRPGRVVGPIPFENSCAMPYQRRVAR

**TaMPK20-4 (clone)** **DPAGAPAAA---AGHHLRDC---SDRQHEVEKDRAHYRPSHHFRDARVAPEAEARPSAY Y-----IPPFNGIAAVGAAGRM-----Y**  
TaMPK20-4 (3AL) NPVLPAAATNVSAYAYHRKSDSSERELQQELEKDRMQYQPMQRFMDAKMVSPD-LRSTSY YMPKGVPKADVAERTGLQPMMQGIAPFNGIAAVGGSYNKASAVQYGVSRMY  
TaMPK20-4 (3DL) NPVLPAAATNVSAYAYHRKSDSSERELQQELEKDRMQYQPMQRFMDAKMVSPD-LRSTSY YMPKGVPKADVAERTGLQPMMQGIAPFNGIAAVGGSYNKASAVQYGVSRMY  
AK333309.1 -----  
TaMPK20-4 (3B) NPVLPAAATNVSAYAYHRKSDSSERELQQELEKDRMQYQPMQRFMDAKMVSPD-LRSTSY YMPKGVPKADVAERTGLQPMMQGIAPFNGIAAVGGSYNKASAVQYGVSRMY

|                    | 100.00 | 76.81  | 77.22  | 76.75  | 83.59  |
|--------------------|--------|--------|--------|--------|--------|
| 1: TaMPK20-4_clone |        |        |        |        |        |
| 2: TaMPK20-4_3AL   | 76.81  | 100.00 | 99.14  | 98.80  | 98.07  |
| 3: TaMPK20-4_3DL   | 77.22  | 99.14  | 100.00 | 99.66  | 99.62  |
| 4: TaMPK20-4_3B    | 76.75  | 98.80  | 99.66  | 100.00 | 100.00 |
| 5: AK333309.1      | 83.59  | 98.07  | 99.62  | 100.00 | 100.00 |

TaMPK20-4(clone) protein sequences used for Y2H interactions (blue font) did not match a nucleotide identifier from Additional File 3. Sequence was aligned with Ensembl sequences encoding TaMPK20-4 using Clustal Omega (<http://www.ebi.ac.uk/Tools/msa/clustalo/>). Percent identity of aligned sequences are also provided.



TaMPK21-2 (3AL) MAKKGSDDKAGFFTEYGEATRYEIGEVVGGKSGYGVVAAVDTHGTGERVAIKKIDDVFEHVA DATRILREIKLLRLLRHPDIVEIKHIMLPPSRREFRDIYIIFELMESDLHQVIKANDDLS  
TaMPK21-2 (3B) MAKKGSDDKGGFFTEYGEATRYQVGEVVGKSGYGVVAVDTHGTGESVAIKKIDDVFEHVA DATRILREIKLLRLLRHPDIVQIKHIMLPPSRREFRDIYIIFELMESDLHQVIKANDDLS  
AK330685.1 MAKKGSDDKGGFFTEYGEATRYQVGEVVGKSGYGVVAVDTHGTGESVAIKKIDDVFEHVA DATRILREIKLLRLLRHPDIVQIKHIMLPPSRREFRDIYIIFELMESDLHQVIKANDDLS  
**TaMPK21-2 (clone)** **MAKKGSDDKAGFFTEYGEATRYQVGEVVGKSGYGVVAVDTHGTGEPVAIKKIDDVFEHVA HATRILREIKLLRLLRHPDIVQIKHIMLPPSRREFRDIYIIFELMESDLHQVIKANDDLS**  
TaMPK21-2 (3DL) MAKKGTDDKAGFFTEYGEATRYQVGEVVGKSGYGVVAVDTHGTGEPVAIKKIDDVFEHVA DATRILREIKLLRLLRHPDIVQIKHIMLPPSRREFRDIYIIFELMESDLHQVIKANDDLS  
\*\*\*\*:\*. . \*\*\*\*\*:\*\*\*\*\*:\*\*\*\*\* \*\*\*\*\* . \*\*\*\*\*:\*\*\*\*\*:\*\*\*\*\*

TaMPK21-2 (3AL) PEHHQFFFYQLLRGMKYMHAANVFHRDLKPKNILANADCKLKICDFGLSRVSNFNDTPSAI FWTDYVATRWRAPELCGSFFSKYTPAIDIWSIGCIFAEMLTGRPLFPGKNVVHQDLDMT  
TaMPK21-2 (3B) PEHHQFFFYQLLRGMKYIHAANVFHRDLKPKNILANADCKLKICDFGLARVSFNDTPSAI FWTDYVATRWRAPELCGSFFSKYTPAIDIWSIGCIFAEMLTGRPLFPGKNVVHQDLDMT  
AK330685.1 PEHHQFFFYQLLRGMKYIHAANVFHRDLKPKNILANADCKLKICDFGLARVSFNDTPSAI FWTDYVATRWRAPELCGSFFSKYTPAIDIWSIGCIFAEMLTGRPLFPGKNVVHQDLDMT  
**TaMPK21-2 (clone)** **PEHHQFFFYQLLRGMKYIHAANVFHRDLKPKNILANADCKLKICDFGLARVSFNDTPSAI FWTDYVATRWRAPELCGSFFSKYTPAIDIWSIGCIFAEMLTGRPLFPGKNVVHQDLDMT**  
TaMPK21-2 (3DL) PENHQFFFYQLLRGMKYIHAANVFHRDLKPKNILANADCKLKICDFGLARVSFNDTPSAI FWTDYVATRWRAPELCGSFFSKYTPAIDIWSIGCIFAEMLTGRPLFPGKNVVHQDLDMT  
\*\*:. \*\*\*\*\*:\*\*\*\*\*:\*\*\*\*\* \*\*\*\*\* \*\*\*\*\*:\*\*\*\*\*:\*\*\*\*\*

TaMPK21-2 (3AL) DLLGTPSEESISRIRNEKARRYLGNMKKKHP IPFSQKFPGVDPMALHLLERLLAFDPADR PTAAEALADPYFTGLANSELEPTTQPISRLEFEFERRKLAREDLRELIYREILEYHPQML  
TaMPK21-2 (3B) DLLGTPSAESISRIRNEKARRYLGNMKKKHP IPFSQKFPGVDPMALHLLERLLAFDPADR PTAAEALADPYFTGLANSELEPTTQPISRLEFEFERRKLAREDLRELIYREILEYHPQML  
AK330685.1 DLLGTPSAESISRIRNEKARRYLGNMKKKHP IPFSQKFPGVDPMALHLLERLLAFDPADR PTAAEALADPYFTGLANSELEPTTQPISRLEFEFERRKLAREDLRELIYREILEYHPQML  
**TaMPK21-2 (clone)** **DLLGTPSAESISRIRNEKARRYLGNMKKKHP IPFSQKFPGVDPMALHLLERLLAFDPTDR PTAAEALADPYFTGLANSELEPTTQPISRLEFEFERRKLAREDLRELIYREILEYHPQML**  
TaMPK21-2 (3DL) DLLGTPSAESISRIRNEKARRYLGNMKKKHP IPFSQKFPGVDPMALHLLERLLAFDPTDR PTAAEALADPYFTGLANSELEPTTQPISRLEFEFERRKLAREDLRELIYREILEYHPQML  
\*\*\*\*\* \*\*\*\*\*:\*\*\*\*\*:\*\*\*\*\* \*\*\*\*\* \*\*\*\*\*:\*\*\*\*\*:\*\*\*\*\* . \*\*\*:\*\*\*\*\*:\*\*\*\*\*

TaMPK21-2 (3AL) HDYLRGGDQANFLYPSGVDRFKSQFVHLEEIGAKGEKTSPLRQHASLPRERVIGSSDEP EKPNADYCIKLVHDELPGHTSVTDGLNKPLLNRNFKSESIGASKCIVVKEKREKDEES  
TaMPK21-2 (3B) HEYLRGGDQANFLYPSGVDRFKRQFVHLEEIGAKGEKTSPLRQHASLPRERVIGSSDEP EKPNADYCIKLVHGEVPGYTSVTDGLNKPLLNRNFKSESIGASKCIVVKEKREKDEES  
AK330685.1 HEYLRGGDQANFLYPSGVDRFKRQFVHLEEIGAKGEKTSPLRQHASLPRERVIGSSDEP EKPNADYCIKLVHGEVPGYTSVTDGLNKPLLNRNFKSESIGASKCIVVKEKREKDEES  
**TaMPK21-2 (clone)** **HEYLRGGDQANFLYPSGVDRFKRQFVHLEEIGAKGEKTSPLRQHASLPRERVIGSSDEP EKPNADYCIKLVHGEVPGYTSVTDGLNKPLLNRNFKSESIGASKCIVVKEKREKDEES**  
TaMPK21-2 (3DL) HEYLRGGDQANFLYPSGVDRFKRQFVHLEEIGAKGEKTSPLRQHASLPRERVIGSSDEP EKPNADYCIKLVHGEVPGHTSVTDGLNKPLLNRNFKSESIGASKCIVVKEKREKDEES  
\*:\*\*\*\*\*:\*\*\*\*\* \*\*\*\*\* \*\*\*\*\*:\*\*\*\*\*:\*\*\*\*\* . \*\*\*:\*\*\*\*\*:\*\*\*\*\*

TaMPK21-2 (3AL) MSEYMHEASD  
TaMPK21-2 (3B) MSEYMHEASD  
AK330685.1 MSEYMHEASD  
**TaMPK21-2 (clone)** **MSEYMHEASD**  
TaMPK21-2 (3DL) MSDYMHEA--  
\*\*:\*\*\*\*\*

|                    |        |        |        |        |        |
|--------------------|--------|--------|--------|--------|--------|
| 1: TaMPK21-2_3AL   | 100.00 | 95.71  | 95.71  | 95.10  | 95.08  |
| 2: TaMPK21-2_3B    | 95.71  | 100.00 | 100.00 | 98.78  | 98.36  |
| 3: AK330685.1      | 95.71  | 100.00 | 100.00 | 98.78  | 98.36  |
| 4: TaMPK21-2_clone | 95.10  | 98.78  | 98.78  | 100.00 | 99.18  |
| 5: TaMPK21-2_3DL   | 95.08  | 98.36  | 98.36  | 99.18  | 100.00 |

TaMPK21-2(clone) protein sequences used for Y2H interactions (blue font) did not match a nucleotide identifier from Additional File 3. Sequence was aligned with Ensembl sequences encoding TaMPK21-2 using Clustal Omega (<http://www.ebi.ac.uk/Tools/msa/clustalo/>). Percent identity of aligned sequences are also provided.

TaMPK24 ( 6BS) MEFFTEYGEASQYQIEEIIGQGSFGVVAADVDTQTGERVAIKKIHDMEFHADPTRILRE IKLLRLLRHPNIVGVKHILLPPARREFRDIYVVFELMESDLQKVIQVVENLTAGHHRIFL  
TaMPK24 ( U) MEFFTEYGEASQYQIEEIIGKGSFGVVAADVDTQTGERVAIKKIHDMEFHASNGTRILRE IKLLRLLRHPNIVETKHILLPPARREFRDIYVVFELMESDLQKVIQANENLTAGHHRFFL  
TaMPK24 ( 6DS) MEFFTEYGEASQYQIEEIIGRGSFGVVAADVDTQTGERVAIKKIHDMEFHASDTRILWE IKLLRLLRHPNIVEIKHILLPPARREFRDIYVVFELMESDLQKVMQVVENLTAGHHRIFL  
**TaMPK24 (clone)** **MEFFTEYGEASQYQIEEIIGKGSFGVVAADVDTQTGERVAIKKIHDMEFHASNGTRILRE IKLLRLLRHPNIVETKHILLPPARREFRDIYVVFELMESDLQKVIQANENLTAGHHRFFL**  
\*\*\*\*\*:\*\*\*\*\* \* \*\*\*\*\* \* \*\*\*\*\* \* \*\*\*\*\* \* \*\*\*\*\* \* \*\*\*\*\* \* \*\*\*\*\* \* \*\*\*\*\* \* \*\*\*\*\* \* \*\*\*\*\* \* \*\*\*\*\* \* \*\*\*\*\* \* \*\*\*\*\* \*

TaMPK24 ( 6BS) YQLLHALKYIHAANVFHRDLKPSNILANSNCKLKICDFGLARALRDDAPLAFWTDYVAT RWYRAPELCSFFSKYTPAIDIWSIGCIFAEVLTGKPLFPGMNVTHQLDLITNVLGTPSY  
TaMPK24 ( U) YQLLHALKYIHAANVFHRDLKPSNILVNSNCKLKICDFGLARASRDDPPLAIFWTDYVAT RWYRAPELCSFFSKXXXXXXXXXXXXXXXXXXXXXXXXXXXXXVXKHQLDLITDVLGTPSY  
TaMPK24 ( 6DS) YQLLHALKYIHAANVFHRDLKPSNILVNSNCKLKICDFGLARASRDDPPLAIFWTDYVAT RWYRAPELCSFFSKYTPAIDIWSIGCIFAEVLTGKPLFPGTNVKHQLDLITDVLGTSPH  
**TaMPK24 (clone)** **YQLLHALKYIHAANVFHRDLKPSNILVNSNCKLKICDFGLARASRDDPPLAIFWTDYVAT RWYRAPELCSFFSKYTPAIDIWSIGCIFAEVLTGKPLFPGTNVKHQLDLITDVLGTSPH**  
\*\*\*\*\* \* \*\*\*\*\*:\*\*\*\*\* \*

TaMPK24 ( 6BS) ETLSQIRNEKARRYLTGMKRKHP IPFPSIFCNADPQAVRLLERLLAFDPKDRPTAEELA DPYFEGFPNLEHEPSPHPFSKLEFEFERWKLTGDKGVRDLIYREIILEYHPQMLQDYIRAGG  
TaMPK24 ( U) ETLSQIRNEKARIYLTGMKRKHP IPFPSMFCNADPQAVRLLERLLAFDPKDRPTAEELA DPYFEGFPNLEHEPSPHPFSKLEFEFERWKLTGDKGIRDLIYREIILEYHPQMLQDYIGAGG  
TaMPK24 ( 6DS) ETLSQIRNEKARRYLTGMKRKHP IPFPSMFCNADPQAVRLLERLLAFDPKDRPTAEELA DPYFEGFPNLEHEPSPHPFSKLEFEFERWKLTGDKGIRDLIYREIILEYHPQMLQDYIRAGG  
**TaMPK24 (clone)** **ETLSQIRNEKARRYLTGMKRKHP IPFPSMFCNADPQAVRLLERLLAFDPKDRPTAEELA DPYFEGFPNLEHEPSPHPFSKLEFEFERWKLTGDKGIRDLIYREIILEYHPQMLQDYIGAGG**  
\*\*\*\*\* \*\*\*\*\* \* \*\*\*\*\*:\*\*\*\*\* \* \*\*\*\*\* \* \*\*\*\*\* \* \*\*\*\*\* \* \*\*\*\*\* \* \*\*\*\*\* \* \*\*\*\*\* \* \*\*\*\*\* \*

TaMPK24 ( 6BS) QTSFVYPSGVDMRLQFVHLEENHLRGERGTPLRRRHASLPRERVCAPKGSNDQCNNER R-TASSAAQTIRSQQEGLTHAYVYQNGTIPDFCSGYLQNGSTSASSCVIEENEGPKE  
TaMPK24 ( U) QTSFVYPSGVDMRLQFVHLEENHLRGERGTPLRRRHASLPRERVCAPKGSNDQCNNER RRTASSAAQTIRSQQEGLTHAYVYQNGTIPNFCSGYLLQNGSTSASSCVIDEHEGLEE  
TaMPK24 ( 6DS) QTSFVYPSGVDDMRLQFVHLEENHLRGERGTPLRRRHASLPRERVCAPKGSNDQCNNER RRTASSAAQTIRSQQEGLTHAYVYQNGTIPNFCSGYLLQNGSTSASSCVIDDHEGLKE  
**TaMPK24 (clone)** **QTSFVYPSGVDMRLQFVHLEENHLRGERGTPLRRRHASLPRERVCAPKGSNDQCNNER RRTASSAAQTIRSQQEGLTHAYVYQNGTIPNFCSGYLLQNGSTSASSCVIDEHEGLEE**  
\*\*\*\*\* \* \*\*\*\*\*:\*\*\*\*\* \* \*\*\*\*\* \* \*\*\*\*\* \* \*\*\*\*\* \* \*\*\*\*\* \* \*\*\*\*\* \* \*\*\*\*\* \* \*\*\*\*\* \* \*\*\*\*\* \*

TaMPK24 ( 6BS) NGVSA-EKVAYELSERLARI  
TaMPK24 ( U) NGVSEEEKVAYELSQCARI  
TaMPK24 ( 6DS) NGVSEEEKVAYELSQCARI  
**TaMPK24 (clone)** **NGLPGS-----**  
\*\*:

1: TaMPK24\_6BS 100.00 88.55 93.98 93.80  
2: TaMPK24\_U 88.55 100.00 91.80 93.00  
3: TaMPK24\_6DS 93.98 91.80 100.00 96.50  
**4: TaMPK24\_clone 93.80 93.00 96.50 100.00**

TaMPK24(clone) protein sequences used for Y2H interactions (blue font) did not match a nucleotide identifier from Additional File 3. Sequence was aligned with Ensembl sequences encoding TaMPK24 using Clustal Omega (<http://www.ebi.ac.uk/Tools/msa/clustalo/>). Percent identity of aligned sequences are also provided.
