# Supplementary material for: Analysis of MAPK and MAPKK gene families in wheat and related Triticeae species
Source: PubMed Central journal article supplement (PMC5838963; doi:10.1186/s12864-018-4545-9), 2018-03-05
Supplement: 12864_2018_4545_MOESM12_ESM.pdf [file 12864_2018_4545_MOESM12_ESM.pdf]

**Additional File 12. qRT-PCR primer sequences.** Forward (F) and reverse (R) primers used to amplify wheat MPKs and MKKs. Housekeeping genes, wheat elongation factor 1-alpha (*TEF1*) accession M90077 and a hexose transporter (*Contig5*) accession CK155621 are shown in blue font.

| Primer Name | Primer Sequence 5'-3'  | Primer Name      | Primer Sequence 5'-3'       |
|-------------|------------------------|------------------|-----------------------------|
| TaMPK3-F    | GGAGATCAAGCTCCTCAGGC   | TaMKK1-F         | GCGAGGCTCCTCCTATCAAG        |
| TaMPK3-R    | ACTGGCAGTGTCTTCCGAG    | TaMKK1-R         | CCATCTGCTTGCGTATGCTT        |
| TaMPK4-F    | TCGAGCCTGGGATTTCTTCG   | TaMKK3-2-F       | GCAAGCAGCGTTGTTCCAGAG       |
| TaMPK4-R    | GTCAACAGTGATGCGTCTGC   | TaMKK3-2-R       | TTGTCCAGAATCGGGCATGT        |
| TaMPK6-F    | CAGCTTATCTCCGAGGAAAACG | TaMKK3-3-F       | AGCCGTTGCGAAAAGATTGG        |
| TaMPK6-R    | TTGTGCCGCACTAGTTGGA    | TaMKK3-3-R       | GCTTGCTGAGAATGTCGGGA        |
| TaMPK7-F    | GGAAACCACGGGAAGCACTA   | TaMKK4-F         | GACATCAAGCCGTCCAACCT        |
| TaMPK7-R    | CTTGATGGCGACCTTCTCGT   | TaMKK4-R         | CGTTGTAGTTGCCGTCGTTG        |
| TaMPK11-F   | AGTAAAGCTGCTTCGCCACA   | TaMKK5-F         | CGCATCAACACCGACATCAA        |
| TaMPK11-R   | TCCTCGGAGCACTTGGTAGA   | TaMKK5-R         | GGAGTAGCAGATGGCGACC         |
| TaMPK14-F   | GTCGTCACCCGCTGGTATAG   | TaMKK6-F         | CAGCTTATCTCCGAGGAAAACG      |
| TaMPK14-R   | CAGGTCAGACTCGCTCATGG   | TaMKK6-R         | TTGTGCCGCACTAGTTGGA         |
| TaMPK16-F   | TTCGGATAATCGGCCACAGG   | TaMKK10-1/3a-F   | CTCAAGGTCCAGCACTACGG        |
| TaMPK16-R   | ACAGCAGCACCTTAGGAAC    | TaMKK10-1/3a-R   | CCACCAGCTCGAGGAGTAGA        |
| TaMPK17-F   | GCAGTGAGCCCTCAAAGTC    | TaMKK10-1/3b-F   | CCAGGGCCCTATGATCCGTA        |
| TaMPK17-R   | CATCGACGGCTCCTTCTGTT   | TaMKK10-1/3b-R   | TTGCCGAAGAAGATAGCGCA        |
| TaMPK20-1-F | ATAAGCCTTCGCTGACGAG    | TaMKK10-4-F      | GAGAAAGGAGGCTACCGCAG        |
| TaMPK20-1-R | TTCGTAAGGCAGAACTGGACC  | TaMKK10-4-R      | AAGTCGATCAGGCGGAACTC        |
| TaMPK20-2-F | GCTATGGGGTTGTGTGCTCT   | TaMKK10-5-F      | GATTATTCACCGCGGCCATC        |
| TaMPK20-2-R | CCTTTCTGGAGGGAGGCAAC   | TaMKK10-5-R      | TCCATCAGCTCGAGGAGCAA        |
| TaMPK20-3-F | GCACCTGAACCTTGTGGGTC   | <i>TEF1-F</i>    | <i>GGTGATGCTGGCATAGTGAA</i> |
| TaMPK20-3-R | CCTTGTCATTCCGCACCTGA   | <i>TEF1-R</i>    | <i>GATGACACCAACAGCCACAG</i> |
| TaMPK20-4-F | AAGACCGCATGCAGTACCAA   | <i>Contig5-F</i> | <i>CTGCAGTGCGTCCATATTTT</i> |
| TaMPK20-4-R | GTTTGGCTGCAAACCAGTCC   | <i>Contig5-R</i> | <i>AACAAGAACGATGCCGAGTT</i> |
| TaMPK20-5-F | TCTATCAGATGCTCCGTGCG   |                  |                             |
| TaMPK20-5-R | GTGGCAACATAGTCCGTCCA   |                  |                             |
| TaMPK21-1-F | CGGCAAGAAGACCTCGGAAT   |                  |                             |
| TaMPK21-1-R | GGTGGCATCGGAGACATGAT   |                  |                             |
| TaMPK21-2-F | GCAACAAGGTGGTATCGTGC   |                  |                             |
| TaMPK21-2-R | AGATTCTGCCGAAGGAGTGC   |                  |                             |
| TaMPK24-F   | CTCCGCCACCCAAACATAGT   |                  |                             |
| TaMPK24-R   | CCTGCGGTGAGGTTCTCATT   |                  |                             |
